# Supplementary material for: Transcriptome Analysis Reveals the Molecular Response to Salinity Challenge in Larvae of the Giant Freshwater Prawn Macrobrachium rosenbergii
Source: Front Physiol. 2022 Apr 29;13:885035. doi: 10.3389/fphys.2022.885035 (PMC9099292; doi:10.3389/fphys.2022.885035)
Supplement: Supplementary file 1 [file Table2.XLSX]

## Sheet: Sheet1
Table S2 Identification of differentially expressed genes between S10 VS S13.
GeneID	S10-1_rpkm	S10-2_rpkm	S10-3_rpkm	S13-1_rpkm	S13-2_rpkm	S13-3_rpkm	log2 Ratio(T2/T1)	Pvalue	FDR	significant
Unigene0003775	0	0	0	2.1534	85.9295	46.8438	15.4569	9.63e-13	6.91e-09	up
Unigene0002406	0	0	0	0.227	59.1738	33.6643	14.921	1.67e-10	2.79e-07	up
Unigene0039841	0	0	0	6.9608	54.5456	14.4975	14.6288	1.43e-16	1.03e-11	up
Unigene0055537	0	0	0	1.243	39.3564	7.8588	13.9795	4.88e-09	2.93e-06	up
Unigene0027815	0	0	0	0	27.2235	20.2206	13.949	1.11e-06	0.000107088	up
Unigene0007462	0	0	0	3.6308	36.6498	6.9537	13.9426	3.1e-10	4.4e-07	up
Unigene0011492	0	0	0	0	30.6074	13.5312	13.8448	1.68e-07	3.27e-05	up
Unigene0039973	0	0	0	1.8951	36.3195	5.6712	13.8365	3.5e-09	2.33e-06	up
Unigene0014474	0	0	0	0	27.794	15.4445	13.8151	8.56e-07	8.94e-05	up
Unigene0041836	0	0	0	2.8269	30.7685	9.0704	13.7958	1.86e-12	1.03e-08	up
Unigene0044091	0	0	0	1.8792	33.6445	6.6064	13.7776	1.77e-11	5.99e-08	up
Unigene0007753	0	0	0	1.4595	33.4426	6.9879	13.7694	2.62e-08	9.64e-06	up
Unigene0041838	0	0	0	3.0085	23.9432	14.601	13.7577	2.81e-13	2.86e-09	up
Unigene0031027	0	0	0	1.5134	23.2029	15.3075	13.7036	1.54e-13	2.2e-09	up
Unigene0039792	0	0	0	0	21.5405	16.2802	13.6219	1.09e-06	0.000105752	up
Unigene0034679	0	0	0	0	20.0018	15.4961	13.5305	1.2e-06	0.000113038	up
Unigene0051594	0	0	0	0.1953	24.0085	10.2884	13.489	3.34e-07	4.81e-05	up
Unigene0031396	0	0	0	1.2189	21.6679	11.3889	13.4799	2.12e-11	6.63e-08	up
Unigene0022630	0	0	0	0.7766	26.0456	6.8944	13.4562	4.56e-08	1.36e-05	up
Unigene0025980	0	0	0	2.0327	21.6512	10.0027	13.4549	2.7e-14	6.16e-10	up
Unigene0071452	0	0	0	0.5557	25.3504	1.9955	13.1831	2.05e-07	3.7e-05	up
Unigene0031060	0	0	0	0.6204	23.09	2.8467	13.1118	1.61e-08	6.87e-06	up
Unigene0028416	0	0	0	0	14.9628	10.651	13.0597	7.98e-07	8.47e-05	up
Unigene0032528	0	0	0	0.5096	22.4765	2.324	13.0425	5.87e-09	3.29e-06	up
Unigene0057979	0	0	0	0	17.9323	7.2988	13.038	8.17e-06	0.000428979	up
Unigene0045250	0	0	0	0	21.6366	0	12.8162	0.00047373	0.00885381	up
Unigene0042150	0	0	0	0.6077	14.8633	5.9049	12.7987	2.6e-10	4.03e-07	up
Unigene0041032	0	0	0	0.477	15.5015	4.8102	12.7585	4.16e-09	2.65e-06	up
Unigene0022147	0	0	0	0.255	16.3587	4.0184	12.7476	2.64e-07	4.25e-05	up
Unigene0043256	0	0	0	0	11.0621	8.5227	12.6725	7.72e-06	0.000410473	up
Unigene0046459	0	0	0	0	12.582	6.9621	12.6695	6.26e-06	0.000356936	up
Unigene0008979	0	0	0	0.6586	13.1153	5.3606	12.6389	1.41e-10	2.53e-07	up
Unigene0027814	0	0	0	0	11.6546	6.5703	12.5687	2.66e-05	0.00104491	up
Unigene0056406	0	0	0	1.6707	16.2413	0	12.5437	4.84e-05	0.00160333	up
Unigene0037189	0	0	0	0	12.1498	5.7321	12.5412	2.4e-06	0.00017867	up
Unigene0005530	0	0	0	0.1537	14.2818	2.5761	12.4693	3.93e-06	0.000255105	up
Unigene0041837	0	0	0	0	12.4609	4.3908	12.4556	1.45e-05	0.000665998	up
Unigene0048776	0	0	0	6.503	9.2759	0.9675	12.4466	4.61e-07	6.07e-05	up
Unigene0007234	0	0	0	0	16.503	0	12.4255	0.00127518	0.0189574	up
Unigene0024783	0	0	0	1.0546	13.3568	1.9356	12.4118	2.01e-06	0.000161045	up
Unigene0003449	0	0	0	0.2369	12.7316	2.8829	12.3674	5.8e-07	6.93e-05	up
Unigene0042570	0	0	0	0	14.2099	1.4821	12.3528	2.48e-05	0.000989099	up
Unigene0036091	0	0	0	0.0834	10.4966	4.4271	12.2884	3.17e-07	4.67e-05	up
Unigene0037178	0	0	0	0.6503	10.6004	3.2759	12.2414	4.44e-09	2.75e-06	up
Unigene0054670	0	0	0	0	11.7194	2.728	12.2336	8.42e-05	0.00241794	up
Unigene0032625	0	0	0	0.823	11.1678	2.3455	12.2224	6.12e-06	0.000351646	up
Unigene0031562	0	0	0	0.8913	11.2541	2.1337	12.2167	2.25e-07	3.88e-05	up
Unigene0023499	0	0	0	1.253	10.58	2.0665	12.1778	4.24e-07	5.67e-05	up
Unigene0053376	0	0	0	0.944	12.0943	0.8475	12.1764	2.28e-05	0.000934539	up
Unigene0066564	0	0	0	2.4689	9.8453	1.548	12.1739	2.65e-07	4.25e-05	up
Unigene0045857	0	0	0	0.5291	10.4092	2.6492	12.145	1.05e-14	3.77e-10	up
Unigene0002970	0	0	0	1.2448	9.854	2.4835	12.1445	2.21e-09	1.79e-06	up
Unigene0017698	0	0	0	0.9468	10.3807	2.1872	12.1373	2.08e-08	8.19e-06	up
Unigene0000893	0	0	0	0.3461	8.9815	3.9457	12.1113	8.57e-08	2.04e-05	up
Unigene0038133	0	0	0	0.2328	8.8598	3.9638	12.0875	4.94e-08	1.45e-05	up
Unigene0052864	0	0	0	0.7425	10.5955	1.6295	12.0777	4.17e-06	0.00026573	up
Unigene0058011	0	0	0	0.6951	9.2189	3.0046	12.0722	7.83e-08	1.94e-05	up
Unigene0067123	0	0	0	0.5318	8.9303	3.3949	12.0653	1.03e-08	4.89e-06	up
Unigene0046716	0	0	0	0	12.6051	0.2375	12.0637	0.00011851	0.00311253	up
Unigene0071314	0	0	0	0.6901	9.6107	2.5174	12.0609	3.62e-06	0.000241476	up
Unigene0035247	0	0	0	0.2423	9.9945	2.1593	12.0126	1.78e-07	3.37e-05	up
Unigene0009081	0	0	0	1.9635	9.5438	0.8705	12.0105	7.38e-06	0.000398409	up
Unigene0020750	0	0	0	0.4025	9.5354	2.3633	12.0015	4.9e-09	2.93e-06	up
Unigene0009743	0	0	0	0	11.385	0.8811	11.9974	0.000785736	0.0131178	up
Unigene0041292	0	0	0	0.0737	9.9418	2.2334	11.9954	1.64e-05	0.000735798	up
Unigene0041090	0	0	0	0.2204	11.1127	0.7916	11.9807	0.000104811	0.00285182	up
Unigene0028227	0	0	0	0.9726	8.7307	2.3991	11.978	7.11e-09	3.78e-06	up
Unigene0034146	0	0	0	1.1628	8.526	2.4125	11.9779	5.2e-06	0.000311305	up
Unigene0044968	0	0	0	0.4363	10.1205	1.4065	11.9614	5.27e-10	6.52e-07	up
Unigene0065505	0	0	0	0.2009	9.4584	2.2445	11.9542	2.9e-05	0.00111299	up
Unigene0034751	0	0	0	1.3508	8.6827	1.7709	11.9421	2.11e-06	0.000165364	up
Unigene0007891	0	0	0	0.1126	10.6926	0.7186	11.9074	0.000218913	0.00487262	up
Unigene0018451	0	0	0	1.7012	8.1831	1.5427	11.8952	1.43e-09	1.29e-06	up
Unigene0003520	0	0	0	1.2956	7.977	2.0679	11.8842	2.26e-07	3.88e-05	up
Unigene0003514	0	0	0	0.0851	11.0268	0.2037	11.8811	2.28e-05	0.000934404	up
Unigene0032285	0	0	0	1.7833	8.1431	1.3662	11.8781	2.7e-07	4.27e-05	up
Unigene0028360	0	0	0	0.7799	6.6938	3.7343	11.8673	5.15e-07	6.45e-05	up
Unigene0002459	0	0	0	1.4452	8.0856	1.6476	11.8635	2.55e-08	9.49e-06	up
Unigene0012196	0	0	0	0.208	9.7049	1.1203	11.8446	8.75e-08	2.05e-05	up
Unigene0051181	0	0	0	2.5364	7.8774	0.6133	11.8438	1.47e-06	0.000129088	up
Unigene0039680	0	0	0	0.8793	7.217	2.7366	11.8182	8.19e-09	4.26e-06	up
Unigene0040494	0	0	0	0.3527	8.993	1.4636	11.815	9.91e-08	2.27e-05	up
Unigene0038677	0	0	0	0.5473	7.5246	2.5331	11.7875	2.2e-07	3.84e-05	up
Unigene0014230	0	0	0	0.4155	8.7936	1.2599	11.7689	1.32e-05	0.000620217	up
Unigene0030671	0	0	0	0.5273	7.645	2.1881	11.7538	1.77e-05	0.000780188	up
Unigene0037566	0	0	0	0.7778	7.4381	2.1282	11.7516	6.8e-09	3.7e-06	up
Unigene0001861	0	0	0	0.5457	8.1093	1.5968	11.7386	1.18e-05	0.000568852	up
Unigene0006132	0	0	0	0.9501	6.5855	2.6538	11.7298	6.74e-09	3.69e-06	up
Unigene0024794	0	0	0	0	10.166	0	11.7265	0.00125747	0.0187524	up
Unigene0064760	0	0	0	2.034	7.139	0.9837	11.7252	2.07e-07	3.7e-05	up
Unigene0068504	0	0	0	0.4617	6.9251	2.7634	11.7243	2.91e-05	0.00111418	up
Unigene0007480	0	0	0	0.2539	6.0306	3.8504	11.7221	7.38e-05	0.00219334	up
Unigene0068300	0	0	0	1.0318	7.9907	1.0171	11.7085	7.43e-07	8.12e-05	up
Unigene0058277	0	0	0	0	6.852	3.1752	11.7067	0.000138617	0.00348265	up
Unigene0006501	0	0	0	0.3624	8.4544	1.1567	11.6989	9.99e-06	0.000502186	up
Unigene0008073	0	0	0	0.8016	8.082	1.0235	11.6893	6.55e-06	0.000369371	up
Unigene0039404	0	0	0	1.4785	7.9713	0.4164	11.6833	1.67e-05	0.000741642	up
Unigene0008848	0	0	0	1.5422	7.3889	0.8204	11.6664	5.39e-05	0.0017471	up
Unigene0024569	0	0	0	1.0045	6.7799	1.9239	11.66	7.34e-06	0.00039702	up
Unigene0009960	0	0	0	1.7845	6.5337	1.3809	11.6587	4.55e-08	1.36e-05	up
Unigene0024737	0	0	0	0.1615	7.5379	1.9015	11.644	7.81e-07	8.37e-05	up
Unigene0065619	0	0	0	0.3871	8.2791	0.9268	11.6428	0.000205233	0.00465175	up
Unigene0046211	0	0	0	0	9.5645	0	11.6385	0.00109905	0.017008	up
Unigene0065175	0	0	0	0.8493	5.9269	2.5416	11.6008	1.05e-05	0.000522565	up
Unigene0007542	0	0	0	2.67	5.9327	0.7102	11.6001	9.12e-05	0.00255911	up
Unigene0062095	0	0	0	0.3104	6.273	2.7251	11.5994	7.32e-06	0.00039702	up
Unigene0040327	0	0	0	1.1498	6.248	1.7552	11.5751	4.97e-08	1.46e-05	up
Unigene0069583	0	0	0	0.0329	7.9295	1.1825	11.5738	4.57e-06	0.000283155	up
Unigene0047581	0	0	0	0.1106	6.4512	2.5596	11.5701	0.000141161	0.00352313	up
Unigene0009183	0	0	0	0.2775	7.4911	1.3286	11.5662	3.57e-06	0.00023891	up
Unigene0041204	0	0	0	0.287	6.7441	2.0613	11.5655	2.14e-06	0.000165801	up
Unigene0034065	0	0	0	0.058	8.092	0.9022	11.5591	2.13e-06	0.000165615	up
Unigene0016504	0	0	0	0	8.9259	0	11.5388	0.00411511	0.0465918	up
Unigene0039363	0	0	0	1.8831	4.7072	2.2541	11.5256	1.92e-05	0.000817801	up
Unigene0021980	0	0	0	0.3905	7.0657	1.3801	11.5243	2.12e-06	0.000165615	up
Unigene0001520	0	0	0	0.3498	6.1571	2.3028	11.5199	2.68e-07	4.26e-05	up
Unigene0005548	0	0	0	0.9447	6.9274	0.9047	11.5145	2.22e-05	0.000915538	up
Unigene0043016	0	0	0	0.1804	7.2287	1.3529	11.5121	1.34e-08	5.93e-06	up
Unigene0027263	0	0	0	0.2555	4.364	4.1284	11.5098	3.02e-06	0.000210864	up
Unigene0031540	0	0	0	0.1436	7.181	1.3755	11.5019	0.000596119	0.0105664	up
Unigene0010609	0	0	0	2.424	4.3282	1.9344	11.4996	6.7e-06	0.000374316	up
Unigene0020880	0	0	0	0.7021	4.2621	3.7217	11.4995	6.37e-08	1.69e-05	up
Unigene0029308	0	0	0	1.4143	6.3506	0.8778	11.4923	4.61e-06	0.000285094	up
Unigene0041218	0	0	0	0.2995	7.829	0.5078	11.4912	1.95e-06	0.00015808	up
Unigene0043703	0	0	0	0	6.6369	1.9629	11.4851	0.000694067	0.0119143	up
Unigene0055614	0	0	0	8.2642	0.1824	0.0873	11.474	0.000109442	0.0029381	up
Unigene0008651	0	0	0	1.3556	6.4007	0.7212	11.4645	5.58e-05	0.00178715	up
Unigene0001570	0	0	0	0.1972	5.5036	2.7534	11.4605	6.24e-05	0.00195107	up
Unigene0006880	0	0	0	1.1819	5.956	1.3025	11.4581	2.94e-07	4.45e-05	up
Unigene0050578	0	0	0	0.7903	6.0363	1.5766	11.4518	9.54e-05	0.00265533	up
Unigene0048813	0	0	0	0.368	6.44	1.5419	11.4426	3.8e-05	0.00134649	up
Unigene0006306	0	0	0	0.3968	6.3645	1.5832	11.4416	5e-05	0.00164412	up
Unigene0009770	0	0	0	0.082	7.9965	0.2618	11.4409	0.000365639	0.00727881	up
Unigene0034288	0	0	0	0.0958	6.7023	1.5283	11.4385	7.06e-06	0.000387749	up
Unigene0038082	0	0	0	0.7282	5.8747	1.7169	11.4374	9.32e-09	4.61e-06	up
Unigene0007323	0	0	0	1.3848	4.1717	2.7626	11.4372	2.36e-08	8.93e-06	up
Unigene0026490	0	0	0	1.1844	5.971	1.1342	11.4321	6.43e-07	7.47e-05	up
Unigene0005282	0	0	0	1.1501	5.9417	1.1931	11.4313	4.17e-05	0.00143534	up
Unigene0069526	0	0	0	0.3287	5.9919	1.9183	11.4233	2.52e-09	1.92e-06	up
Unigene0027002	0	0	0	2.098	5.7004	0.4367	11.4226	2.31e-05	0.000941563	up
Unigene0053892	0	0	0	0	7.0465	1.1736	11.42	0.00119904	0.018099	up
Unigene0031701	0	0	0	0.4409	7.3472	0.3518	11.4058	5.64e-05	0.00180603	up
Unigene0037018	0	0	0	0.6215	6.1743	1.3352	11.4043	4.32e-07	5.75e-05	up
Unigene0000203	0	0	0	0.2598	5.9179	1.9353	11.4011	7.56e-07	8.17e-05	up
Unigene0057270	0	0	0	0.6754	6.3512	1.0779	11.3995	3.96e-05	0.00137963	up
Unigene0017885	0	0	0	1.4736	6.037	0.588	11.3985	2.23e-06	0.000170133	up
Unigene0002626	0	0	0	0.7838	5.7145	1.5115	11.3826	1.82e-06	0.000149766	up
Unigene0062806	0	0	0	1.6219	5.9851	0.3698	11.3766	0.000137217	0.00346199	up
Unigene0005936	0	0	0	0.3912	6.4728	1.0926	11.373	5.81e-08	1.61e-05	up
Unigene0059879	0	0	0	0.9631	5.4505	1.5051	11.3661	3.12e-08	1.1e-05	up
Unigene0059947	0	0	0	0.8048	6.4821	0.5708	11.3549	4.93e-05	0.00162488	up
Unigene0020185	0	0	0	1.5227	6.0513	0.2804	11.3543	0.000207267	0.00467865	up
Unigene0031945	0	0	0	0.1543	5.9135	1.7852	11.3541	1.19e-06	0.000112627	up
Unigene0028843	0	0	0	1.3907	5.5923	0.8685	11.3538	1.11e-06	0.000107088	up
Unigene0029921	0	0	0	0.3947	5.9196	1.5298	11.3524	2.74e-06	0.000197139	up
Unigene0060916	0	0	0	0.3968	5.2074	2.2165	11.3481	4.4e-05	0.00149118	up
Unigene0001486	0	0	0	0.1912	6.4532	1.1445	11.3422	0.000143929	0.00356913	up
Unigene0011301	0	0	0	1.9459	5.4218	0.3882	11.3361	3.29e-06	0.000225511	up
Unigene0034352	0	0	0	1.4374	5.6893	0.5735	11.3257	0.000125023	0.00323566	up
Unigene0035613	0	0	0	0.9009	5.3872	1.3955	11.3226	4.19e-07	5.63e-05	up
Unigene0026762	0	0	0	1.3833	4.8532	1.3944	11.3127	1.76e-06	0.000147173	up
Unigene0033973	0	0	0	0.086	6.8096	0.6865	11.3034	0.000268135	0.00571827	up
Unigene0009089	0	0	0	1.6811	4.7791	1.1048	11.3002	1.58e-05	0.000713612	up
Unigene0062952	0	0	0	1.409	4.3508	1.7196	11.2837	3.23e-06	0.000222049	up
Unigene0003721	0	0	0	0.9828	4.9952	1.4901	11.2816	2.17e-05	0.000901896	up
Unigene0017257	0	0	0	0.707	5.8909	0.8463	11.2769	1.17e-05	0.000566699	up
Unigene0025837	0	0	0	0.8503	5.1168	1.4324	11.2682	2.33e-05	0.000949461	up
Unigene0002177	0	0	0	0.12	4.75	2.49	11.2605	1.44e-05	0.000664593	up
Unigene0010111	0	0	0	0.3906	5.2368	1.7284	11.2597	1.38e-07	2.86e-05	up
Unigene0001475	0	0	0	0.3703	5.4223	1.5621	11.2595	2.41e-06	0.00017867	up
Unigene0037570	0	0	0	2.5477	4.4753	0.3297	11.2591	8.31e-06	0.000433717	up
Unigene0058152	0	0	0	0.2834	6.4944	0.5654	11.2572	0.00109307	0.0169375	up
Unigene0068725	0	0	0	2.1108	4.1941	1.0366	11.2569	3.97e-06	0.000256716	up
Unigene0035536	0	0	0	0	7.1037	0.2171	11.2528	0.00167287	0.0232342	up
Unigene0064619	0	0	0	1.4973	4.8409	0.9559	11.2476	9.1e-07	9.34e-05	up
Unigene0069795	0	0	0	0.1773	3.8419	3.2549	11.2436	6.36e-05	0.00197827	up
Unigene0042363	0	0	0	2.1224	4.3827	0.7364	11.2371	1.73e-05	0.000764595	up
Unigene0003199	0	0	0	0.1053	5.0618	2.0456	11.2314	1.4e-06	0.000124859	up
Unigene0005207	0	0	0	0.8984	5.8223	0.4779	11.2285	0.000117095	0.00308778	up
Unigene0003867	0	0	0	1.6311	4.9659	0.6007	11.2284	3.01e-06	0.000210344	up
Unigene0001841	0	0	0	0.1793	6.7246	0.2862	11.2268	0.000431221	0.00827703	up
Unigene0038657	0	0	0	0	5.9204	1.2645	11.2258	0.000103733	0.00282891	up
Unigene0001058	0	0	0	1.1566	5.5149	0.5128	11.2257	7.71e-06	0.000410205	up
Unigene0040746	0	0	0	0	6.8163	0.3548	11.223	0.00128431	0.0190616	up
Unigene0046305	0	0	0	0.286	6.2551	0.6276	11.2225	5.86e-05	0.00185828	up
Unigene0039101	0	0	0	0	7.1646	0	11.2217	0.00247057	0.0313682	up
Unigene0039252	0	0	0	1.1682	4.6552	1.3375	11.221	2.18e-07	3.83e-05	up
Unigene0032068	0	0	0	1.2276	4.4571	1.4695	11.2196	8.89e-06	0.000458804	up
Unigene0069975	0	0	0	0.3527	4.6043	2.1578	11.2116	0.000159354	0.00384102	up
Unigene0031890	0	0	0	1.2731	5.0213	0.8128	11.2101	1.77e-05	0.000778811	up
Unigene0032626	0	0	0	0.2351	4.8002	2.064	11.2085	0.000252453	0.00546665	up
Unigene0018433	0	0	0	0.0901	5.0274	1.9762	11.2074	6.37e-06	0.000360969	up
Unigene0025747	0	0	0	0.4105	5.2444	1.4194	11.2034	0.000407735	0.00793617	up
Unigene0017172	0	0	0	0.7072	5.1067	1.254	11.2021	1.4e-05	0.000646485	up
Unigene0050077	0	0	0	0.4214	5.9688	0.6725	11.201	0.000768277	0.0129083	up
Unigene0022488	0	0	0	0.8369	4.6823	1.5266	11.1976	1.29e-06	0.000118643	up
Unigene0000590	0	0	0	0.344	4.1763	2.5096	11.1943	1.06e-06	0.000103804	up
Unigene0042384	0	0	0	1.8446	4.6112	0.552	11.1898	1.16e-05	0.0005636	up
Unigene0034919	0	0	0	0.9937	5.474	0.5287	11.1874	3.91e-06	0.000255079	up
Unigene0037573	0	0	0	0.3543	5.3136	1.3005	11.1816	2.06e-05	0.000865108	up
Unigene0002874	0	0	0	0.2159	5.5329	1.2063	11.1789	1.02e-05	0.000507563	up
Unigene0005050	0	0	0	0.4275	5.0763	1.4499	11.1786	0.000126214	0.00326001	up
Unigene0016593	0	0	0	0	6.9508	0	11.178	0.00387423	0.0443966	up
Unigene0043189	0	0	0	0.1249	5.8778	0.9465	11.1777	1.76e-06	0.000147173	up
Unigene0070198	0	0	0	0.2035	6.6973	0	11.1676	0.00268389	0.0333594	up
Unigene0001019	0	0	0	1.4238	4.6061	0.8689	11.1672	1.36e-05	0.000635282	up
Unigene0061575	0	0	0	0.2641	5.8974	0.7165	11.1628	1.38e-05	0.000642273	up
Unigene0060379	0	0	0	0.4394	4.7592	1.6654	11.1599	0.000125237	0.00323592	up
Unigene0053964	0	0	0	0	6.854	0	11.1578	0.00238044	0.0304629	up
Unigene0063301	0	0	0	0.4865	5.9791	0.3882	11.1577	0.000641529	0.0111922	up
Unigene0035445	0	0	0	0.2251	4.5021	2.1259	11.1576	5.72e-07	6.87e-05	up
Unigene0008948	0	0	0	0.46	5.6542	0.7342	11.1566	0.000326908	0.00665451	up
Unigene0026801	0	0	0	1.2327	4.2371	1.3526	11.1511	0.00028008	0.00591052	up
Unigene0069763	0	0	0	0.5335	5.8531	0.4257	11.149	0.000145345	0.00359137	up
Unigene0008808	0	0	0	0.7989	5.148	0.85	11.1457	2.1e-06	0.000165215	up
Unigene0014272	0	0	0	0.851	5.1056	0.8149	11.1403	3.48e-05	0.00126299	up
Unigene0007917	0	0	0	0.9789	4.4278	1.3391	11.1348	0.000235718	0.00517449	up
Unigene0003194	0	0	0	0	6.7433	0	11.1343	0.00369347	0.0427621	up
Unigene0067064	0	0	0	0.6428	5.0675	1.0259	11.1328	1.43e-06	0.000127082	up
Unigene0033186	0	0	0	0.9141	5.47	0.3316	11.1284	8.59e-05	0.00245489	up
Unigene0004945	0	0	0	0.3508	5.5531	0.8047	11.1268	3.01e-06	0.000210504	up
Unigene0061426	0	0	0	0.4527	4.7148	1.5352	11.1256	3.47e-06	0.000234473	up
Unigene0021525	0	0	0	0.5261	5.1877	0.9797	11.1236	6.19e-05	0.00194129	up
Unigene0018071	0	0	0	0.709	4.5901	1.3928	11.1232	1.3e-06	0.000119375	up
Unigene0037087	0	0	0	0	4.5967	2.0929	11.1227	0.000564249	0.0101264	up
Unigene0018878	0	0	0	0.7002	4.9594	1.0244	11.1215	0.000180776	0.00422546	up
Unigene0030331	0	0	0	0.2357	4.1246	2.3199	11.1207	3.87e-05	0.00135792	up
Unigene0013604	0	0	0	0	5.1281	1.5509	11.1205	0.00115883	0.0176292	up
Unigene0018383	0	0	0	1.489	5.0757	0.108	11.1191	6.44e-05	0.00199708	up
Unigene0032229	0	0	0	0.9998	4.4257	1.2466	11.119	2.14e-06	0.000165801	up
Unigene0033629	0	0	0	0	6.6642	0	11.1173	0.0030745	0.0369852	up
Unigene0018867	0	0	0	0.482	4.3605	1.8133	11.1154	8.64e-06	0.000448168	up
Unigene0005907	0	0	0	0	5.3539	1.301	11.1152	0.000892148	0.0144574	up
Unigene0011333	0	0	0	0.9264	4.6828	1.0349	11.1129	3.2e-06	0.000220654	up
Unigene0069999	0	0	0	0.3082	5.7137	0.6148	11.1113	9.67e-05	0.00267891	up
Unigene0067077	0	0	0	1.1085	4.8702	0.6433	11.1081	9.01e-05	0.0025351	up
Unigene0031722	0	0	0	0.4914	4.8724	1.2548	11.1073	1.72e-06	0.000145009	up
Unigene0000169	0	0	0	0.5589	5.0913	0.9514	11.1036	3.38e-07	4.85e-05	up
Unigene0009530	0	0	0	0.9216	4.6928	0.9806	11.1022	7.26e-05	0.00216869	up
Unigene0068683	0	0	0	0.9678	5.0535	0.5663	11.1006	1.1e-05	0.000539308	up
Unigene0067000	0	0	0	0.1433	3.6421	2.8019	11.1005	4.02e-05	0.00139546	up
Unigene0029868	0	0	0	0.2879	3.8685	2.4125	11.0965	2.5e-07	4.11e-05	up
Unigene0034694	0	0	0	0.0578	4.9142	1.5688	11.0903	5.2e-05	0.00170201	up
Unigene0025199	0	0	0	1.7082	4.0327	0.7952	11.0893	0.000276307	0.00586294	up
Unigene0030279	0	0	0	0.3023	4.7862	1.4475	11.0892	3.88e-05	0.00135845	up
Unigene0031417	0	0	0	0	4.6903	1.8409	11.0882	0.000697969	0.0119698	up
Unigene0053570	0	0	0	0.6224	4.5812	1.3245	11.0875	9.34e-05	0.00261137	up
Unigene0029298	0	0	0	1.2669	4.6918	0.5617	11.0858	1.31e-05	0.000615362	up
Unigene0059458	0	0	0	0	4.2247	2.2869	11.0838	0.00110213	0.0170483	up
Unigene0056519	0	0	0	0.2725	5.903	0.3262	11.0816	0.00175359	0.0240437	up
Unigene0068709	0	0	0	0.222	5.549	0.7086	11.0767	0.000576808	0.0102824	up
Unigene0030899	0	0	0	0.7235	4.5967	1.1547	11.0757	4.46e-05	0.00150426	up
Unigene0052378	0	0	0	0.0759	5.1255	1.2726	11.0755	0.000163548	0.00391712	up
Unigene0009943	0	0	0	0.3919	5.6601	0.417	11.0744	0.00106386	0.0166076	up
Unigene0018747	0	0	0	1.1543	4.7748	0.5264	11.0714	5.56e-07	6.74e-05	up
Unigene0021204	0	0	0	0.2784	5.5104	0.6666	11.0713	6.53e-05	0.00201496	up
Unigene0033631	0	0	0	0.538	4.8417	1.0734	11.0708	3.54e-06	0.000237764	up
Unigene0021520	0	0	0	1.0912	5.042	0.3166	11.0701	0.000197776	0.0045256	up
Unigene0071970	0	0	0	0	6.4381	0	11.0675	0.0014237	0.0205362	up
Unigene0004473	0	0	0	1.0678	3.8826	1.4718	11.0639	2.86e-05	0.00109832	up
Unigene0026229	0	0	0	0	6.4179	0	11.0629	0.00092341	0.0148634	up
Unigene0029734	0	0	0	0.4878	3.4551	2.4747	11.0629	5.2e-08	1.51e-05	up
Unigene0027221	0	0	0	0.7413	4.7596	0.9047	11.0602	6.63e-07	7.61e-05	up
Unigene0034569	0	0	0	0.553	4.7002	1.1474	11.059	0.000174959	0.00412305	up
Unigene0009102	0	0	0	1.984	3.5673	0.8333	11.0554	4.95e-05	0.00162986	up
Unigene0071085	0	0	0	0.716	4.5244	1.1428	11.0551	3.93e-06	0.000255105	up
Unigene0009063	0	0	0	0.2197	4.7592	1.4024	11.0547	0.000342898	0.00691623	up
Unigene0062596	0	0	0	1.3852	4.7129	0.2763	11.0531	0.000373344	0.00739123	up
Unigene0027136	0	0	0	0.4204	5.3426	0.5871	11.0476	0.000352896	0.00708209	up
Unigene0011077	0	0	0	0.6407	5.29	0.4183	11.0474	1.88e-05	0.000809983	up
Unigene0019695	0	0	0	1.0158	4.6552	0.6586	11.0429	8.42e-06	0.000438358	up
Unigene0001863	0	0	0	1.3066	3.9067	1.104	11.0401	8.02e-06	0.000422885	up
Unigene0068100	0	0	0	1.5767	4.7295	0	11.0376	0.0012903	0.0191306	up
Unigene0027161	0	0	0	1.4299	3.2765	1.5975	11.0371	2.38e-06	0.00017717	up
Unigene0017571	0	0	0	0.6827	4.0474	1.5714	11.0365	3.79e-09	2.43e-06	up
Unigene0055505	0	0	0	0.7599	4.0645	1.4671	11.0342	1.67e-09	1.44e-06	up
Unigene0048552	0	0	0	0	5.5851	0.7064	11.0342	0.000425938	0.0082077	up
Unigene0003139	0	0	0	0.8163	4.3076	1.158	11.032	4.15e-05	0.00143067	up
Unigene0036035	0	0	0	0.5141	4.4976	1.2649	11.0308	6.98e-07	7.86e-05	up
Unigene0037976	0	0	0	0	6.2645	0	11.028	0.00206369	0.027279	up
Unigene0001065	0	0	0	0.2487	5.3107	0.6947	11.0256	1.18e-06	0.000112105	up
Unigene0030988	0	0	0	1.4661	3.5054	1.2717	11.0231	1.5e-06	0.000130892	up
Unigene0024057	0	0	0	0.7425	5.4911	0	11.0209	0.00134283	0.0197263	up
Unigene0024747	0	0	0	2.3322	3.7786	0.1034	11.0164	0.000989401	0.0156726	up
Unigene0056133	0	0	0	1.5227	4.6849	0	11.0149	0.00194532	0.0260313	up
Unigene0000426	0	0	0	0.8697	4.7103	0.6246	11.0142	6.89e-05	0.00209119	up
Unigene0055682	0	0	0	1.6091	3.6567	0.9339	11.013	0.000330117	0.00670553	up
Unigene0017441	0	0	0	0.5842	4.0568	1.5541	11.0119	7.06e-05	0.00212396	up
Unigene0018600	0	0	0	0.6046	4.3664	1.2063	11.0078	0.000109778	0.0029381	up
Unigene0063608	0	0	0	1.4299	4.2098	0.5325	11.0066	8.01e-05	0.00232485	up
Unigene0007245	0	0	0	0.2995	4.9906	0.8762	11.0052	0.000280259	0.00591187	up
Unigene0001949	0	0	0	0.2729	5.4567	0.4355	11.0049	0.000366074	0.00728345	up
Unigene0029916	0	0	0	0.5989	4.8908	0.6691	11.0035	0.000438072	0.00835922	up
Unigene0010996	0	0	0	0.312	5.0366	0.8091	11.0032	2.27e-06	0.000172534	up
Unigene0041089	0	0	0	0.2499	5.2067	0.6981	11.0025	0.000943286	0.0151007	up
Unigene0025278	0	0	0	0.3041	4.611	1.2132	10.9963	1.77e-05	0.000779879	up
Unigene0022435	0	0	0	0.6194	4.5804	0.9268	10.9959	3.64e-05	0.00130303	up
Unigene0015454	0	0	0	0.1867	4.7455	1.1921	10.9954	0.000243592	0.00531501	up
Unigene0070804	0	0	0	0	4.8203	1.3021	10.9949	0.00385735	0.0442597	up
Unigene0001794	0	0	0	1.3839	4.3243	0.4141	10.9949	7.12e-05	0.00213152	up
Unigene0006599	0	0	0	0.1386	4.1581	1.8252	10.9948	5.87e-05	0.00185828	up
Unigene0015076	0	0	0	0.6259	4.992	0.4995	10.9937	0.000148928	0.00365598	up
Unigene0048807	0	0	0	0.9491	4.3058	0.8416	10.9888	0.000122666	0.00319064	up
Unigene0035569	0	0	0	0.3334	4.0564	1.7029	10.9879	1.81e-05	0.000790298	up
Unigene0068366	0	0	0	0.0818	4.6356	1.371	10.9869	0.000239089	0.00523408	up
Unigene0055404	0	0	0	0.0788	5.2506	0.7543	10.9858	0.000326077	0.00664604	up
Unigene0021929	0	0	0	1.1376	4.3783	0.562	10.9844	3.93e-06	0.000255105	up
Unigene0023035	0	0	0	0.1662	4.9161	0.9947	10.9842	0.000192552	0.00444032	up
Unigene0015490	0	0	0	0.7603	4.5931	0.7079	10.9804	1.28e-05	0.000606637	up
Unigene0058390	0	0	0	2.123	3.4537	0.484	10.9803	9.46e-05	0.00263816	up
Unigene0008674	0	0	0	0	5.3281	0.729	10.9794	0.00252906	0.0318973	up
Unigene0026114	0	0	0	0.4785	3.8545	1.7185	10.9781	3.01e-05	0.00113876	up
Unigene0027959	0	0	0	0.8294	3.9581	1.2636	10.978	1.34e-05	0.000625886	up
Unigene0071763	0	0	0	0.4163	5.5502	0.0831	10.9777	0.00135758	0.0198535	up
Unigene0027751	0	0	0	0.4859	4.7232	0.8401	10.9776	6.95e-05	0.00210348	up
Unigene0069280	0	0	0	0.663	3.6602	1.7196	10.976	2.31e-05	0.00094157	up
Unigene0067872	0	0	0	0.4114	3.6562	1.9696	10.9747	1.39e-05	0.000642645	up
Unigene0019022	0	0	0	0.1759	5.7882	0.0702	10.974	0.00134166	0.019713	up
Unigene0067065	0	0	0	0	5.0747	0.9573	10.9735	0.00118658	0.0179525	up
Unigene0053322	0	0	0	0.4513	4.1994	1.3806	10.9733	3.05e-05	0.00114914	up
Unigene0054675	0	0	0	1.0593	4.1779	0.789	10.9721	9.45e-08	2.2e-05	up
Unigene0016908	0	0	0	1.0158	3.4461	1.5633	10.9718	2.09e-08	8.2e-06	up
Unigene0003445	0	0	0	1.0556	3.3298	1.6246	10.9682	6.71e-06	0.000374471	up
Unigene0057177	0	0	0	0	6.0079	0	10.9677	0.00212919	0.0279449	up
Unigene0011531	0	0	0	0	5.2067	0.7978	10.9669	0.000211056	0.00473845	up
Unigene0022590	0	0	0	0.1575	4.2005	1.6343	10.9639	0.000109832	0.0029381	up
Unigene0060633	0	0	0	0	1.373	4.6022	10.9598	0.000129639	0.003321	up
Unigene0005295	0	0	0	0.4247	2.9192	2.6263	10.9586	0.000131912	0.00335528	up
Unigene0014469	0	0	0	0.1666	5.0679	0.7313	10.9575	0.000265719	0.00567518	up
Unigene0020694	0	0	0	0.3033	4.8014	0.8605	10.9574	9.95e-07	9.95e-05	up
Unigene0021516	0	0	0	0.6328	4.6573	0.6733	10.957	0.000258673	0.00556081	up
Unigene0007036	0	0	0	2.1892	3.1162	0.6551	10.9563	3.88e-05	0.00135792	up
Unigene0019894	0	0	0	0.4535	3.9675	1.538	10.9559	0.000238379	0.00522014	up
Unigene0005731	0	0	0	0.1053	3.8329	2.0175	10.9551	2.34e-06	0.000175565	up
Unigene0066796	0	0	0	0.147	4.1634	1.6418	10.9542	0.00156456	0.0220713	up
Unigene0065734	0	0	0	1.2035	4.1367	0.6003	10.9514	2.54e-05	0.00100964	up
Unigene0052017	0	0	0	0.5065	3.7283	1.6843	10.9462	4.15e-05	0.00143099	up
Unigene0054980	0	0	0	0.2948	4.6677	0.9411	10.9424	0.00028369	0.00595798	up
Unigene0040013	0	0	0	2.6331	2.6816	0.5837	10.9411	0.000483078	0.00898638	up
Unigene0037546	0	0	0	0.1735	4.4083	1.315	10.9408	0.000198004	0.00452793	up
Unigene0003583	0	0	0	0	5.6391	0.2572	10.9406	0.00178331	0.0243582	up
Unigene0068831	0	0	0	0.8087	3.8749	1.2101	10.94	8.95e-05	0.00252178	up
Unigene0030228	0	0	0	0.5824	4.5297	0.7747	10.9383	0.000166136	0.00396588	up
Unigene0005244	0	0	0	0.3802	4.6723	0.8343	10.9383	0.000217302	0.00484125	up
Unigene0036969	0	0	0	0.5454	4.8174	0.5223	10.9379	0.000433168	0.00830759	up
Unigene0018471	0	0	0	0.1386	4.8511	0.8849	10.9353	0.00191128	0.0256806	up
Unigene0022139	0	0	0	1.2618	3.7628	0.8479	10.9348	6.71e-06	0.000374471	up
Unigene0025840	0	0	0	0.2953	4.8225	0.754	10.9346	6.32e-07	7.4e-05	up
Unigene0045788	0	0	0	0.1649	5.7022	0	10.9335	0.00240266	0.0307035	up
Unigene0071255	0	0	0	0.3436	4.9393	0.5827	10.9331	6.59e-06	0.000370264	up
Unigene0033024	0	0	0	0	4.9095	0.9404	10.9292	0.000660792	0.0114665	up
Unigene0043382	0	0	0	0	5.576	0.2739	10.9292	0.00205807	0.0272355	up
Unigene0003263	0	0	0	0.3597	4.758	0.7176	10.9256	5.87e-06	0.000341504	up
Unigene0033579	0	0	0	0	4.8198	1.0133	10.9251	0.00421024	0.0474519	up
Unigene0027615	0	0	0	0.7896	3.0266	2.0164	10.925	0.000573821	0.0102419	up
Unigene0020334	0	0	0	0	3.2444	2.5805	10.9231	0.000281069	0.00591506	up
Unigene0005153	0	0	0	0.1176	3.6246	2.064	10.9184	3.36e-05	0.00122911	up
Unigene0070994	0	0	0	0.3702	4.5497	0.8862	10.9184	0.000191508	0.00442303	up
Unigene0011654	0	0	0	0.5371	4.2069	1.0287	10.9101	5.42e-06	0.000320848	up
Unigene0067194	0	0	0	0	5.6981	0.0737	10.9098	0.000840595	0.0138184	up
Unigene0008872	0	0	0	0.5183	4.4263	0.8271	10.9098	0.000655693	0.0113972	up
Unigene0010654	0	0	0	0	5.1438	0.6252	10.9091	6.98e-05	0.00210899	up
Unigene0005847	0	0	0	1.01	3.5467	1.209	10.9083	9.57e-06	0.000485195	up
Unigene0029541	0	0	0	0.9268	4.8267	0	10.9053	0.0027678	0.034154	up
Unigene0025543	0	0	0	0.6908	4.0552	1.0022	10.9039	7.23e-08	1.85e-05	up
Unigene0035874	0	0	0	0.574	4.0656	1.0994	10.9016	6.78e-06	0.000376498	up
Unigene0070576	0	0	0	1.1149	3.9894	0.628	10.8999	1.3e-05	0.000613804	up
Unigene0010451	0	0	0	0.6255	3.6049	1.4974	10.8988	1.88e-06	0.00015317	up
Unigene0023868	0	0	0	0.5989	3.9925	1.1351	10.8985	2.83e-05	0.00109401	up
Unigene0009499	0	0	0	0.1541	5.2001	0.3689	10.8976	0.000385044	0.00757896	up
Unigene0037380	0	0	0	0.3726	3.9737	1.3677	10.8953	4.3e-05	0.00146726	up
Unigene0058064	0	0	0	0.276	3.565	1.8723	10.8951	0.000850957	0.0139505	up
Unigene0059578	0	0	0	0	2.1338	3.5762	10.8943	0.000154851	0.0037615	up
Unigene0056096	0	0	0	0	5.6452	0.0607	10.8933	0.00311826	0.0373614	up
Unigene0005285	0	0	0	1.0503	4.2787	0.3725	10.8922	0.000508868	0.00932425	up
Unigene0051733	0	0	0	0.5618	4.9155	0.2242	10.8922	0.00223203	0.0290346	up
Unigene0033502	0	0	0	0.7281	3.5186	1.4525	10.8916	1.39e-05	0.000644551	up
Unigene0031716	0	0	0	0.1878	4.3823	1.1242	10.8903	0.000316638	0.0065128	up
Unigene0008224	0	0	0	0.3734	4.8232	0.4967	10.8901	5.5e-05	0.00177021	up
Unigene0060942	0	0	0	0.3353	3.2597	2.0961	10.8895	6.62e-06	0.000370768	up
Unigene0035389	0	0	0	0.4548	3.4105	1.8146	10.8867	7.7e-05	0.00225654	up
Unigene0066413	0	0	0	1.1721	3.3368	1.1691	10.8862	5.44e-05	0.0017577	up
Unigene0033580	0	0	0	1.8907	3.1508	0.6353	10.8859	8.32e-05	0.00239868	up
Unigene0057559	0	0	0	0.8113	4.0562	0.8093	10.8859	0.000154098	0.00375211	up
Unigene0065571	0	0	0	0.9098	3.7906	0.9681	10.8838	0.000110485	0.0029481	up
Unigene0016889	0	0	0	0	4.8791	0.787	10.8832	0.000465997	0.00874141	up
Unigene0024846	0	0	0	0	4.2846	1.3678	10.8797	0.000459705	0.00866289	up
Unigene0017921	0	0	0	0.3159	4.6715	0.6616	10.8788	4.24e-06	0.000268593	up
Unigene0035028	0	0	0	0.048	3.9156	1.6836	10.8784	3.76e-05	0.00133408	up
Unigene0061363	0	0	0	0.0798	5.0508	0.5092	10.8765	3.28e-05	0.00121143	up
Unigene0066671	0	0	0	0.6066	3.9591	1.0487	10.87	0.000168315	0.00400141	up
Unigene0072001	0	0	0	3.0666	2.348	0.1984	10.8696	0.000118778	0.00311841	up
Unigene0030192	0	0	0	0.8984	3.9925	0.7169	10.8683	0.000964917	0.0153529	up
Unigene0021853	0	0	0	0.4824	4.4217	0.693	10.8655	0.000249244	0.00542004	up
Unigene0044460	0	0	0	0	0	5.5954	10.8651	0.00119589	0.0180591	up
Unigene0005492	0	0	0	1.0351	3.6417	0.9178	10.8649	0.000206874	0.00467419	up
Unigene0043385	0	0	0	0.193	3.859	1.5399	10.8642	0.000292037	0.00610472	up
Unigene0009070	0	0	0	0.481	5.0095	0.096	10.8628	0.00224044	0.0291071	up
Unigene0059968	0	0	0	0	4.1731	1.4106	10.862	0.000584712	0.0103898	up
Unigene0006233	0	0	0	0.0977	4.3948	1.0912	10.862	0.000635247	0.0111037	up
Unigene0064207	0	0	0	0	4.5399	1.0397	10.861	0.00288569	0.035196	up
Unigene0029847	0	0	0	0.3038	3.9232	1.3332	10.856	0.00148673	0.0212279	up
Unigene0034393	0	0	0	0	5.5206	0.0335	10.8544	0.000230081	0.00507245	up
Unigene0025629	0	0	0	0.8002	3.0377	1.7029	10.8509	3.87e-05	0.00135792	up
Unigene0001850	0	0	0	0.9288	3.7331	0.872	10.8491	3.4e-06	0.000231164	up
Unigene0059102	0	0	0	0.1533	2.6833	2.6922	10.8478	0.00176239	0.0241406	up
Unigene0069965	0	0	0	0.6683	3.5267	1.3332	10.8476	0.000200887	0.00458073	up
Unigene0034289	0	0	0	0.156	4.0292	1.3381	10.8464	4.55e-06	0.000283037	up
Unigene0007819	0	0	0	2.5322	2.4114	0.5774	10.8458	5.68e-05	0.00181219	up
Unigene0024690	0	0	0	0.3185	3.6712	1.525	10.8441	7.88e-06	0.000417624	up
Unigene0055310	0	0	0	1.1723	3.9825	0.3598	10.8441	0.000162912	0.00390581	up
Unigene0054991	0	0	0	0.9784	4.348	0.1735	10.8402	0.000792417	0.0131987	up
Unigene0055919	0	0	0	0.5623	3.8333	1.1014	10.8395	3.66e-06	0.000243829	up
Unigene0031735	0	0	0	0.3968	4.5461	0.5541	10.8395	0.000435311	0.00832646	up
Unigene0017415	0	0	0	0.4917	3.9152	1.09	10.8394	7.34e-06	0.00039702	up
Unigene0020759	0	0	0	0.0603	4.4251	1.0113	10.8394	0.000136773	0.00345444	up
Unigene0071050	0	0	0	0	3.2433	2.2493	10.8383	0.000370685	0.00735886	up
Unigene0006421	0	0	0	1.2273	3.6723	0.5787	10.8346	5.31e-06	0.000316712	up
Unigene0061530	0	0	0	0	5.4715	0	10.8328	0.00147526	0.0211019	up
Unigene0015854	0	0	0	0	4.9941	0.4724	10.8314	0.0011903	0.0179898	up
Unigene0051329	0	0	0	2.7745	1.9719	0.7163	10.8304	2.57e-05	0.00101723	up
Unigene0003095	0	0	0	0.3557	4.7418	0.3548	10.8277	0.000444434	0.00845143	up
Unigene0008831	0	0	0	0.1265	4.2152	1.1101	10.8276	0.00150493	0.0214291	up
Unigene0059768	0	0	0	0.6323	4.1098	0.7064	10.8267	0.000685166	0.0117869	up
Unigene0052901	0	0	0	4.9378	0.5038	0	10.8249	0.00303023	0.036586	up
Unigene0008410	0	0	0	0.0995	5.1408	0.1985	10.8241	0.000173107	0.00408745	up
Unigene0021604	0	0	0	0.0608	4.2563	1.1161	10.8226	0.000135106	0.00341715	up
Unigene0072292	0	0	0	0.944	3.4415	1.0359	10.8195	0.000249853	0.00543	up
Unigene0067521	0	0	0	0.755	4.1176	0.5477	10.8192	5.41e-07	6.64e-05	up
Unigene0001403	0	0	0	0.4516	4.032	0.9268	10.8166	2.9e-05	0.00111299	up
Unigene0061484	0	0	0	1.0523	3.6533	0.6998	10.8152	7.49e-05	0.00221263	up
Unigene0003146	0	0	0	0.8376	3.6988	0.8689	10.8152	5.79e-05	0.00183749	up
Unigene0027505	0	0	0	0.716	4.2426	0.4444	10.8146	0.000120234	0.0031454	up
Unigene0003528	0	0	0	0.0726	5.1448	0.1739	10.8115	0.000894132	0.014477	up
Unigene0006512	0	0	0	0.0577	3.703	1.612	10.8065	8.69e-05	0.00247363	up
Unigene0007714	0	0	0	0.4191	4.1901	0.7524	10.8035	0.000425007	0.00820395	up
Unigene0003999	0	0	0	1.2538	3.514	0.5912	10.8028	6.18e-06	0.000354643	up
Unigene0031830	0	0	0	0.4191	4.1028	0.836	10.8025	1.14e-05	0.000555554	up
Unigene0015677	0	0	0	0.5308	3.8923	0.9319	10.8017	7.46e-06	0.000401666	up
Unigene0055202	0	0	0	0.8353	4.3503	0.1667	10.801	0.000815629	0.0135132	up
Unigene0037671	0	0	0	0.6648	4.1545	0.5305	10.8003	0.000131523	0.0033513	up
Unigene0071435	0	0	0	1.4382	3.2528	0.6558	10.7995	0.000151944	0.00371352	up
Unigene0001362	0	0	0	0.2868	4.0631	0.9919	10.7981	9.6e-06	0.000485968	up
Unigene0006866	0	0	0	1.1138	3.109	1.111	10.796	2.05e-06	0.000162315	up
Unigene0019182	0	0	0	1.4299	3.2169	0.6846	10.7953	0.000654583	0.0113835	up
Unigene0071878	0	0	0	0.7297	2.9389	1.6499	10.7918	0.000259036	0.00556475	up
Unigene0026796	0	0	0	0.746	3.823	0.7442	10.7904	5.52e-07	6.74e-05	up
Unigene0020004	0	0	0	1.0323	3.7095	0.5663	10.789	1.91e-05	0.000817282	up
Unigene0026275	0	0	0	0.1583	3.6278	1.5161	10.7874	0.000171641	0.00406085	up
Unigene0020990	0	0	0	0	4.4955	0.801	10.7859	0.00424707	0.0477403	up
Unigene0016986	0	0	0	0.6194	3.8707	0.8032	10.785	6.49e-05	0.00200819	up
Unigene0026893	0	0	0	0	4.2128	1.0725	10.7828	0.00051081	0.00934728	up
Unigene0058801	0	0	0	0.2826	4.4738	0.5262	10.7821	0.00051794	0.00944886	up
Unigene0020828	0	0	0	0.2529	4.3205	0.7064	10.7813	0.00139826	0.0202832	up
Unigene0024825	0	0	0	0.1272	4.1345	1.0153	10.7805	0.000108115	0.00291196	up
Unigene0071450	0	0	0	1.0581	3.2328	0.9851	10.7803	5.36e-05	0.00173948	up
Unigene0040052	0	0	0	0.3931	4.0126	0.8627	10.7782	0.000326888	0.00665451	up
Unigene0044275	0	0	0	0.1889	3.5687	1.5078	10.7774	4.85e-05	0.00160558	up
Unigene0053746	0	0	0	0.1824	4.7884	0.2912	10.7764	0.000961466	0.0153227	up
Unigene0019788	0	0	0	0.4884	3.7437	1.0133	10.7719	0.00022705	0.0050255	up
Unigene0064962	0	0	0	1.8029	2.4143	1.0276	10.7717	3.76e-06	0.000247865	up
Unigene0061147	0	0	0	0.5269	3.4023	1.3139	10.7712	1.83e-05	0.00079662	up
Unigene0040728	0	0	0	0	5.2413	0	10.7707	0.00188194	0.0253913	up
Unigene0001736	0	0	0	0.0673	4.1468	1.0197	10.7687	0.000224502	0.00498003	up
Unigene0005474	0	0	0	0.7838	3.5103	0.9382	10.7683	0.000148631	0.00364994	up
Unigene0001980	0	0	0	0.2288	3.765	1.2323	10.7666	2.91e-05	0.00111418	up
Unigene0045930	0	0	0	0.3999	3.7488	1.0771	10.7665	7.19e-06	0.000392058	up
Unigene0029083	0	0	0	0.6164	4.2371	0.3689	10.7655	0.000158274	0.00382141	up
Unigene0066654	0	0	0	1.1308	3.6344	0.4512	10.7639	8.59e-05	0.00245513	up
Unigene0026336	0	0	0	0	3.8945	1.321	10.7636	0.00172975	0.0237941	up
Unigene0052319	0	0	0	0	4.8504	0.3629	10.763	0.00271837	0.0336713	up
Unigene0057382	0	0	0	0.0872	4.2872	0.8351	10.762	0.000622562	0.0109272	up
Unigene0009676	0	0	0	0.7838	3.4831	0.9382	10.7607	0.000559794	0.0100565	up
Unigene0016682	0	0	0	1.4059	3.2677	0.5314	10.7607	3.49e-05	0.00126449	up
Unigene0030832	0	0	0	0.234	3.8343	1.1203	10.7562	0.000147553	0.00363467	up
Unigene0015623	0	0	0	0.3935	3.2243	1.5701	10.756	2.42e-05	0.000973079	up
Unigene0066785	0	0	0	0.1856	3.8154	1.1851	10.7555	5.95e-05	0.00188073	up
Unigene0023600	0	0	0	1.1355	3.1826	0.865	10.7546	2.05e-06	0.000162282	up
Unigene0002295	0	0	0	0	3.9732	1.1959	10.7507	0.000613564	0.0108111	up
Unigene0065035	0	0	0	1.612	2.1697	1.3853	10.7501	0.000187533	0.00435224	up
Unigene0052103	0	0	0	0.7618	3.5267	0.8782	10.7501	7.98e-05	0.0023208	up
Unigene0031038	0	0	0	0.4199	4.4783	0.2681	10.75	0.000428319	0.00823837	up
Unigene0071803	0	0	0	0.8514	3.3443	0.9705	10.7499	0.000396406	0.00776007	up
Unigene0053171	0	0	0	0.6333	3.9576	0.5685	10.748	0.000115891	0.00306842	up
Unigene0001532	0	0	0	1.073	3.7254	0.3568	10.7469	0.000208908	0.00470723	up
Unigene0019179	0	0	0	0.6641	3.3201	1.1659	10.7454	0.000638612	0.0111554	up
Unigene0026542	0	0	0	0.2602	4.1193	0.7613	10.7428	0.000317445	0.0065238	up
Unigene0022124	0	0	0	0.9376	2.9017	1.2826	10.7375	0.000434244	0.00831465	up
Unigene0018773	0	0	0	0.1936	4.4083	0.5149	10.7361	0.000160317	0.00385905	up
Unigene0065223	0	0	0	1.9664	2.9259	0.2242	10.736	0.00144928	0.0208173	up
Unigene0072207	0	0	0	0.7425	3.5576	0.8147	10.7355	0.000146713	0.00362018	up
Unigene0034570	0	0	0	0.8737	4.0039	0.2324	10.7341	0.00250983	0.0317202	up
Unigene0008972	0	0	0	0.6286	3.1426	1.3376	10.7338	0.000201033	0.0045826	up
Unigene0007186	0	0	0	0.5668	3.8573	0.6785	10.7321	0.000254507	0.00549952	up
Unigene0060868	0	0	0	0.7806	3.9025	0.4153	10.7309	0.00117138	0.0177899	up
Unigene0017297	0	0	0	2.3709	2.195	0.5255	10.7289	0.000572122	0.0102243	up
Unigene0025591	0	0	0	0.4773	3.5797	1.0285	10.7272	4.65e-06	0.000286575	up
Unigene0066928	0	0	0	0.3413	2.4649	2.2698	10.7245	0.000407833	0.00793617	up
Unigene0010215	0	0	0	0.6349	3.174	1.2666	10.7244	0.000225659	0.00500262	up
Unigene0059868	0	0	0	2.3807	1.3225	1.3721	10.7243	0.000303413	0.0062937	up
Unigene0013939	0	0	0	0.7456	3.7279	0.595	10.7224	0.000393306	0.00771097	up
Unigene0043028	0	0	0	0.0998	4.4083	0.5576	10.7216	0.0013444	0.0197434	up
Unigene0058650	0	0	0	1.9291	2.9957	0.14	10.7213	0.000331425	0.0067226	up
Unigene0053643	0	0	0	0.368	3.2967	1.3951	10.7199	0.00018414	0.00429292	up
Unigene0034106	0	0	0	0.1809	2.7128	2.1651	10.7196	0.000264139	0.00564984	up
Unigene0026661	0	0	0	0	4.8356	0.2232	10.7196	0.001824	0.0247258	up
Unigene0021312	0	0	0	0.3619	3.7478	0.9489	10.7196	1.33e-05	0.000622674	up
Unigene0005502	0	0	0	2.4418	1.7692	0.8472	10.7194	0.000130346	0.00333078	up
Unigene0026799	0	0	0	1.4764	3.3831	0.1964	10.7188	0.0011245	0.017265	up
Unigene0045633	0	0	0	0.0472	4.4607	0.5458	10.7182	6.64e-06	0.000371739	up
Unigene0009799	0	0	0	1.5642	2.6067	0.8811	10.7177	6.53e-05	0.00201541	up
Unigene0032850	0	0	0	0.475	3.6278	0.9476	10.7172	9.54e-05	0.00265533	up
Unigene0015759	0	0	0	0.8613	3.742	0.4418	10.7157	3.16e-05	0.00117627	up
Unigene0063404	0	0	0	0.4455	3.4339	1.1555	10.7128	0.000446703	0.00848111	up
Unigene0055703	0	0	0	1.2116	3.4325	0.3867	10.7116	0.000729283	0.0123885	up
Unigene0023819	0	0	0	0.5247	4.0805	0.4187	10.7096	0.000323064	0.00659463	up
Unigene0039424	0	0	0	0	5.0238	0	10.7096	0.00363199	0.0422203	up
Unigene0016490	0	0	0	1.1685	2.9209	0.9324	10.709	0.000107663	0.00290684	up
Unigene0006811	0	0	0	0.4544	3.8674	0.6993	10.7088	7.84e-07	8.37e-05	up
Unigene0052031	0	0	0	0	3.3581	1.6623	10.7086	0.000147099	0.00362597	up
Unigene0026268	0	0	0	0.404	3.5106	1.1054	10.7085	1.76e-05	0.000776594	up
Unigene0031039	0	0	0	1.2304	3.6907	0.0982	10.7083	0.00198507	0.0264252	up
Unigene0037069	0	0	0	0.0942	4.3953	0.5262	10.7073	0.00117977	0.0178871	up
Unigene0067397	0	0	0	0.6665	3.7488	0.5984	10.7067	0.000144933	0.00358735	up
Unigene0013412	0	0	0	0.3514	4.0017	0.6543	10.7049	0.0010164	0.015977	up
Unigene0024986	0	0	0	0.7333	4.1901	0.0836	10.7048	0.00158548	0.0223138	up
Unigene0026628	0	0	0	1.1836	3.0485	0.7728	10.7042	0.000212465	0.00476469	up
Unigene0035074	0	0	0	1.0728	3.5232	0.4029	10.7024	3.65e-07	5.11e-05	up
Unigene0028444	0	0	0	0.4884	2.9502	1.5588	10.702	0.000489313	0.00906247	up
Unigene0066083	0	0	0	0.7806	3.9025	0.3115	10.7012	0.00152936	0.0216813	up
Unigene0056440	0	0	0	0.7149	4.0509	0.2282	10.701	0.00277827	0.0342596	up
Unigene0070672	0	0	0	1.168	3.5496	0.2741	10.7004	7.66e-05	0.00224896	up
Unigene0042763	0	0	0	0.6545	3.6357	0.6964	10.6989	0.000444564	0.00845166	up
Unigene0029357	0	0	0	0.6184	4.0362	0.329	10.698	2.73e-05	0.00106348	up
Unigene0025580	0	0	0	1.7693	3.122	0.0831	10.6953	0.0010114	0.0159176	up
Unigene0062904	0	0	0	0.711	2.7931	1.4591	10.6921	2.1e-06	0.000165325	up
Unigene0055826	0	0	0	0.3413	3.8869	0.7263	10.6896	0.000922874	0.0148634	up
Unigene0060840	0	0	0	1.1889	2.6252	1.1385	10.689	3.75e-06	0.000247793	up
Unigene0018692	0	0	0	0.5754	3.9555	0.4209	10.6888	1.47e-05	0.000674244	up
Unigene0057301	0	0	0	2.5808	2.3655	0	10.6872	0.00390241	0.0446554	up
Unigene0030848	0	0	0	0.8793	3.0773	0.9824	10.685	8.17e-05	0.00236328	up
Unigene0031633	0	0	0	0.2957	3.6964	0.944	10.6842	0.000474245	0.00885647	up
Unigene0060374	0	0	0	1.309	3.1813	0.4352	10.6811	0.000411946	0.00799453	up
Unigene0049903	0	0	0	0.5204	4.2638	0.1384	10.6802	0.00078714	0.0131322	up
Unigene0064292	0	0	0	0.2713	3.3157	1.3351	10.6801	6.59e-06	0.000370264	up
Unigene0054779	0	0	0	0.3038	4.3029	0.303	10.6765	0.000377603	0.00745025	up
Unigene0069932	0	0	0	1.2697	3.2702	0.3685	10.6761	0.00064615	0.0112641	up
Unigene0072177	0	0	0	0.481	3.5496	0.8773	10.6759	5.28e-05	0.00172132	up
Unigene0039552	0	0	0	0.2602	4.3361	0.3115	10.6759	0.00305726	0.0368148	up
Unigene0015148	0	0	0	1.928	2.8114	0.1648	10.6748	9.98e-05	0.0027457	up
Unigene0062208	0	0	0	0.2801	3.5785	1.0431	10.6741	0.000364669	0.00726345	up
Unigene0055585	0	0	0	0.3883	4.1252	0.3873	10.6738	0.000716209	0.0122271	up
Unigene0062262	0	0	0	0.0965	4.3413	0.462	10.6735	0.00147325	0.0210773	up
Unigene0052346	0	0	0	0.3824	2.8681	1.6481	10.6732	6.83e-05	0.00208129	up
Unigene0061491	0	0	0	0.2448	3.5357	1.107	10.6699	0.000211104	0.00473845	up
Unigene0063993	0	0	0	0.4462	3.8772	0.5595	10.6686	6.56e-05	0.00201982	up
Unigene0063735	0	0	0	0.2109	2.812	1.8515	10.666	0.000559989	0.0100575	up
Unigene0000604	0	0	0	0.3871	3.7417	0.7414	10.6648	0.000153354	0.00373908	up
Unigene0066705	0	0	0	0.6104	3.9675	0.2923	10.6648	0.00152631	0.0216508	up
Unigene0064449	0	0	0	0	4.8689	0	10.6644	0.00165303	0.0230298	up
Unigene0068183	0	0	0	0.8493	2.7423	1.2708	10.6625	0.000185377	0.00431332	up
Unigene0059978	0	0	0	0	4.8552	0	10.6604	0.00286062	0.0349929	up
Unigene0017864	0	0	0	1.2209	2.9841	0.6495	10.6601	6.46e-05	0.00200298	up
Unigene0052140	0	0	0	1.1411	3.6304	0.0828	10.6601	0.00129934	0.019225	up
Unigene0054631	0	0	0	0.9282	3.3256	0.5925	10.6577	0.000194894	0.00447819	up
Unigene0071092	0	0	0	0.2228	3.5267	1.0962	10.6575	3.72e-06	0.000246261	up
Unigene0067253	0	0	0	0.1941	3.6399	1.0071	10.6562	0.00061409	0.0108155	up
Unigene0015950	0	0	0	0.5074	3.4766	0.8549	10.6555	1.78e-05	0.000781252	up
Unigene0067422	0	0	0	1.536	3.093	0.2043	10.6538	0.00146105	0.0209402	up
Unigene0023046	0	0	0	1.1999	3.5449	0.087	10.6534	0.00151962	0.0216004	up
Unigene0026099	0	0	0	0.2262	3.2042	1.3839	10.6481	0.000137855	0.00347565	up
Unigene0060078	0	0	0	1.2116	2.7258	0.8702	10.6461	0.000388008	0.00762268	up
Unigene0057093	0	0	0	0.2405	3.5066	1.0555	10.6446	0.00116544	0.0177073	up
Unigene0066733	0	0	0	0	3.7136	1.0887	10.6445	0.0019208	0.0257704	up
Unigene0016229	0	0	0	1.239	2.9007	0.6592	10.6435	9.43e-06	0.000479306	up
Unigene0028583	0	0	0	1.2547	3.2932	0.2503	10.6433	5.67e-05	0.00181085	up
Unigene0019130	0	0	0	0.264	3.8493	0.6846	10.6432	0.000120418	0.00314879	up
Unigene0040762	0	0	0	0	3.2414	1.5522	10.6419	0.000987699	0.0156526	up
Unigene0058086	0	0	0	0.7711	2.8913	1.1281	10.641	0.000579783	0.0103176	up
Unigene0033462	0	0	0	0.2022	4.1556	0.4303	10.6403	0.00025195	0.00546233	up
Unigene0040118	0	0	0	0.2768	3.9214	0.5891	10.64	0.000597198	0.0105799	up
Unigene0055220	0	0	0	1.423	3.101	0.262	10.6396	0.000661321	0.0114729	up
Unigene0028995	0	0	0	0	3.9412	0.8388	10.6378	0.00330811	0.0391526	up
Unigene0035018	0	0	0	0.5842	3.6511	0.5439	10.6376	0.000431114	0.00827703	up
Unigene0066345	0	0	0	1.2256	3.0637	0.489	10.6373	0.000672601	0.0116152	up
Unigene0035321	0	0	0	0.3112	3.7168	0.745	10.6357	0.00072042	0.0122728	up
Unigene0006645	0	0	0	0.5454	3.1813	1.0446	10.6352	0.000409354	0.00796145	up
Unigene0023617	0	0	0	0	4.5252	0.2442	10.6346	0.00255991	0.032192	up
Unigene0055317	0	0	0	0.9566	3.116	0.694	10.6338	0.00012347	0.00320759	up
Unigene0057839	0	0	0	0.3767	3.6237	0.7651	10.6334	1.65e-06	0.000139959	up
Unigene0001398	0	0	0	0.5807	3.9514	0.2317	10.6329	0.000856431	0.0140336	up
Unigene0013769	0	0	0	0.1764	3.6001	0.9851	10.6323	0.000458467	0.00864728	up
Unigene0025940	0	0	0	0.6424	3.3899	0.7262	10.6313	1.18e-05	0.000570248	up
Unigene0072167	0	0	0	0	4.0265	0.7313	10.6311	0.00181957	0.0246844	up
Unigene0025937	0	0	0	0.4232	3.8793	0.4503	10.6296	0.000156081	0.00378757	up
Unigene0035634	0	0	0	0	3.5952	1.1477	10.6266	0.00270783	0.0335812	up
Unigene0025631	0	0	0	0.7742	3.2256	0.7414	10.6261	0.00171187	0.0235978	up
Unigene0059326	0	0	0	0.5204	3.1798	1.0382	10.6252	0.000154996	0.00376251	up
Unigene0030836	0	0	0	0.2216	3.2774	1.2378	10.6247	3.44e-05	0.00125186	up
Unigene0072281	0	0	0	0.2079	3.7538	0.7743	10.6245	0.000172121	0.00406953	up
Unigene0007123	0	0	0	0.9012	3.7547	0.0799	10.6244	0.00144583	0.0207748	up
Unigene0066268	0	0	0	0	2.9504	1.7846	10.6242	0.000478375	0.00891737	up
Unigene0055643	0	0	0	0.3023	3.9465	0.4825	10.6231	0.000922933	0.0148634	up
Unigene0016024	0	0	0	0.2015	4.3664	0.1608	10.6223	0.00227151	0.0293955	up
Unigene0019400	0	0	0	0.8745	3.6433	0.2093	10.6218	0.000448262	0.00849727	up
Unigene0002121	0	0	0	0.4535	4.0305	0.2413	10.6212	0.000358268	0.00716203	up
Unigene0030807	0	0	0	0.9336	3.2674	0.5215	10.6204	0.000247115	0.00537793	up
Unigene0068644	0	0	0	0.6119	3.3142	0.7935	10.6195	8.75e-05	0.00248203	up
Unigene0032154	0	0	0	0.5089	3.3924	0.8122	10.6176	3.97e-05	0.00138147	up
Unigene0070239	0	0	0	0.6062	3.444	0.6597	10.6165	1.85e-05	0.00080377	up
Unigene0052730	0	0	0	0.4785	3.6552	0.5728	10.6155	0.000201437	0.00458598	up
Unigene0019911	0	0	0	0.3943	3.3679	0.944	10.6154	0.000404605	0.00789261	up
Unigene0060599	0	0	0	0	4.3929	0.31	10.6144	0.000964041	0.0153454	up
Unigene0069684	0	0	0	0.2159	2.0692	2.4125	10.6127	0.000664335	0.0115109	up
Unigene0064151	0	0	0	0	2.9928	1.7042	10.6126	0.0019698	0.0262756	up
Unigene0053531	0	0	0	1.0711	3.002	0.6216	10.6119	0.000231422	0.00509364	up
Unigene0022049	0	0	0	0.8579	2.9786	0.8558	10.6111	3.63e-05	0.00130303	up
Unigene0063014	0	0	0	0.1901	4.1972	0.3034	10.6106	0.00135738	0.0198535	up
Unigene0068104	0	0	0	0.3435	4.2366	0.1097	10.6103	0.000543804	0.0098283	up
Unigene0017214	0	0	0	0	3.9768	0.7086	10.609	0.00424689	0.0477403	up
Unigene0026333	0	0	0	0.156	3.9643	0.5602	10.6075	0.000489314	0.00906247	up
Unigene0055185	0	0	0	0.4564	3.5267	0.6954	10.6069	4.93e-06	0.0003	up
Unigene0037373	0	0	0	1.9017	1.9502	0.8171	10.6039	0.000818507	0.013539	up
Unigene0040978	0	0	0	1.8505	2.0757	0.7384	10.6026	2.08e-05	0.000873698	up
Unigene0054001	0	0	0	0	4.1893	0.472	10.6016	0.0038476	0.044176	up
Unigene0055903	0	0	0	0.8487	3.2532	0.5418	10.5961	1.92e-05	0.000817801	up
Unigene0072005	0	0	0	0.992	3.1226	0.5277	10.5957	0.000512995	0.00938247	up
Unigene0008373	0	0	0	3.3981	1.2431	0	10.5953	0.00160329	0.0224808	up
Unigene0062240	0	0	0	0.1483	2.5956	1.8939	10.5943	0.000178872	0.00419597	up
Unigene0056625	0	0	0	1.9727	1.9427	0.7156	10.5921	9.05e-05	0.00254405	up
Unigene0053522	0	0	0	0.1519	4.1131	0.3636	10.5914	0.000632851	0.0110726	up
Unigene0007787	0	0	0	0.5449	2.7245	1.359	10.5913	3.2e-05	0.00118705	up
Unigene0029249	0	0	0	1.2647	3.1614	0.2018	10.5912	0.00167595	0.0232589	up
Unigene0055911	0	0	0	0.5569	3.2483	0.8147	10.5887	0.000268928	0.00573179	up
Unigene0063764	0	0	0	0.6075	3.1639	0.8484	10.5887	0.00195589	0.0261435	up
Unigene0022326	0	0	0	0.9959	3.3192	0.298	10.5866	0.00134706	0.0197641	up
Unigene0019068	0	0	0	0.4251	2.7159	1.4701	10.5859	0.00132001	0.0194707	up
Unigene0051658	0	0	0	0.4899	3.1022	1.0164	10.5851	7.06e-06	0.000387749	up
Unigene0024811	0	0	0	0.7903	3.2925	0.5255	10.5851	0.00133774	0.0196716	up
Unigene0024605	0	0	0	1.3226	2.7552	0.5277	10.5842	0.000441776	0.00841201	up
Unigene0068720	0	0	0	0.4278	3.4221	0.7511	10.5828	0.000264746	0.005658	up
Unigene0009322	0	0	0	0.5326	3.7279	0.34	10.5826	0.00106392	0.0166076	up
Unigene0009979	0	0	0	0.6078	3.8831	0.1078	10.582	0.000357016	0.00714282	up
Unigene0052189	0	0	0	0	4.0548	0.5377	10.5801	0.0017455	0.0239602	up
Unigene0070166	0	0	0	0.149	3.7254	0.7136	10.5787	0.00446744	0.0496443	up
Unigene0030484	0	0	0	0.46	3.7567	0.3671	10.5774	0.000634604	0.0110978	up
Unigene0052272	0	0	0	0	2.794	1.7839	10.5755	0.00310607	0.0372464	up
Unigene0021482	0	0	0	3.6855	0.7925	0.0949	10.5739	0.00278701	0.0343379	up
Unigene0014892	0	0	0	0.6636	2.6727	1.2357	10.5736	0.000364469	0.00726157	up
Unigene0020821	0	0	0	0.0737	3.498	0.9991	10.5733	0.000455016	0.00859801	up
Unigene0005744	0	0	0	0.6015	3.007	0.9599	10.5725	3.75e-05	0.00133124	up
Unigene0027650	0	0	0	0.3926	3.4581	0.7161	10.572	3.58e-05	0.00129096	up
Unigene0070163	0	0	0	0.1483	3.708	0.7102	10.5719	0.00446788	0.0496443	up
Unigene0014448	0	0	0	0	4.5662	0	10.5718	0.00282593	0.0346687	up
Unigene0069096	0	0	0	0.4114	3.7704	0.383	10.5714	0.000184578	0.00429894	up
Unigene0021020	0	0	0	0.3557	3.8527	0.3548	10.5709	0.000685478	0.0117894	up
Unigene0053101	0	0	0	0.992	3.3063	0.2639	10.5706	0.000287591	0.00602633	up
Unigene0006453	0	0	0	0.9282	2.9905	0.6419	10.57	2.39e-05	0.000964568	up
Unigene0054582	0	0	0	1.6205	2.9389	0	10.5697	0.00220656	0.0287711	up
Unigene0034661	0	0	0	0.2138	3.9185	0.4265	10.5695	0.00174593	0.0239615	up
Unigene0015363	0	0	0	0.2306	3.6505	0.6747	10.5685	0.000317396	0.0065238	up
Unigene0015753	0	0	0	1.2448	3.1118	0.1987	10.5684	0.00167562	0.0232589	up
Unigene0063869	0	0	0	0.4078	3.1151	1.0306	10.5678	6.49e-05	0.00200727	up
Unigene0020940	0	0	0	0.2826	3.218	1.0523	10.5676	0.000439689	0.00837894	up
Unigene0010245	0	0	0	0	4.5506	0	10.5669	0.00393767	0.0449371	up
Unigene0064718	0	0	0	0.839	3.2626	0.4464	10.5661	0.00180506	0.0245664	up
Unigene0005265	0	0	0	0.4401	3.6214	0.4829	10.5649	4.64e-05	0.00155524	up
Unigene0043126	0	0	0	0.7417	3.09	0.7102	10.5641	0.00171154	0.0235978	up
Unigene0055279	0	0	0	0.512	3.4129	0.6129	10.5628	6.33e-05	0.00197286	up
Unigene0031551	0	0	0	0.5789	2.5727	1.3859	10.5627	0.000205047	0.004649	up
Unigene0023380	0	0	0	0.2442	3.1876	1.1042	10.5622	0.000267016	0.00569779	up
Unigene0065696	0	0	0	0.5021	3.7188	0.3116	10.5611	7.08e-05	0.00212502	up
Unigene0016321	0	0	0	0	3.1118	1.4156	10.5595	0.00207427	0.0273843	up
Unigene0001892	0	0	0	0.686	3.6895	0.1493	10.5587	0.000189932	0.00440223	up
Unigene0005643	0	0	0	0.179	3.6791	0.6666	10.5586	0.000129703	0.00332145	up
Unigene0031479	0	0	0	0.3607	3.1059	1.0555	10.5578	0.00104859	0.016411	up
Unigene0021476	0	0	0	0.6046	3.1908	0.7238	10.5569	0.000419826	0.00811722	up
Unigene0064189	0	0	0	0.5868	3.2268	0.7023	10.5558	2.85e-05	0.00109705	up
Unigene0015426	0	0	0	1.18	3.1465	0.1883	10.5555	0.0014872	0.0212303	up
Unigene0043384	0	0	0	0.4471	3.3528	0.7136	10.5551	0.000871491	0.0142254	up
Unigene0040089	0	0	0	0.3404	3.9001	0.2716	10.5546	0.000737392	0.0124967	up
Unigene0041395	0	0	0	1.4256	3.0093	0.0758	10.5542	0.00106178	0.0165814	up
Unigene0031029	0	0	0	1.1228	3.0617	0.3258	10.554	0.000571926	0.0102233	up
Unigene0029869	0	0	0	0.2243	3.9255	0.358	10.5532	0.00219827	0.028689	up
Unigene0034662	0	0	0	0.8272	3.1016	0.5776	10.5528	0.000464095	0.00871681	up
Unigene0024950	0	0	0	0.7325	3.1876	0.5846	10.5523	0.000161185	0.00387345	up
Unigene0022994	0	0	0	0.1415	3.4193	0.941	10.5513	3.82e-05	0.00135092	up
Unigene0031553	0	0	0	1.4938	2.0538	0.9536	10.5511	2.71e-05	0.00106091	up
Unigene0024326	0	0	0	0.3749	3.2282	0.8976	10.551	0.0013447	0.0197434	up
Unigene0052909	0	0	0	0.2985	3.5654	0.6353	10.5505	0.000827002	0.0136481	up
Unigene0072135	0	0	0	0.4941	3.808	0.1971	10.5505	0.00277199	0.0341998	up
Unigene0011166	0	0	0	0.826	3.1956	0.4708	10.5483	3.36e-05	0.00122911	up
Unigene0031776	0	0	0	0.7794	3.4834	0.2262	10.5472	0.000215497	0.00480995	up
Unigene0058987	0	0	0	0.8579	3.0978	0.5325	10.547	0.000332567	0.00674003	up
Unigene0070265	0	0	0	0.3082	3.852	0.3279	10.5469	0.00141542	0.0204536	up
Unigene0019245	0	0	0	0.1132	4.1019	0.2709	10.5463	0.000332967	0.00674245	up
Unigene0056178	0	0	0	2.3827	0.3843	1.7174	10.5457	9.62e-05	0.00267081	up
Unigene0071971	0	0	0	0.779	3.0831	0.6216	10.5455	0.000343241	0.00692121	up
Unigene0025349	0	0	0	0.1443	3.186	1.1514	10.5449	0.000245263	0.00534479	up
Unigene0009473	0	0	0	0.257	2.8913	1.3332	10.5448	0.0015424	0.0218145	up
Unigene0054138	0	0	0	0.3413	2.773	1.3619	10.5431	0.000210593	0.00473291	up
Unigene0066872	0	0	0	3.3146	0.956	0.2035	10.5424	0.00225549	0.0292233	up
Unigene0027135	0	0	0	1.0077	2.589	0.8712	10.5404	8.71e-05	0.00247424	up
Unigene0054097	0	0	0	1.4171	2.5978	0.4523	10.5402	0.00141416	0.0204438	up
Unigene0022506	0	0	0	0	3.9185	0.5473	10.5397	0.00375274	0.0433433	up
Unigene0052883	0	0	0	3.7034	0.4408	0.3166	10.5381	0.00301802	0.0364861	up
Unigene0005083	0	0	0	0.3052	3.1791	0.9743	10.5374	0.00308158	0.0370394	up
Unigene0006287	0	0	0	0.1639	3.5965	0.6976	10.5372	9.4e-05	0.00262489	up
Unigene0063071	0	0	0	0.6187	3.4897	0.3418	10.5347	2.25e-05	0.000927491	up
Unigene0025269	0	0	0	0.1087	4.1668	0.1735	10.5343	0.00405565	0.0460639	up
Unigene0068112	0	0	0	0.2079	3.4651	0.7743	10.5338	0.000208926	0.00470723	up
Unigene0028123	0	0	0	0.3359	3.1721	0.9382	10.5334	3.38e-05	0.00123596	up
Unigene0001429	0	0	0	0.2727	2.8177	1.3493	10.5313	2.68e-05	0.0010501	up
Unigene0059646	0	0	0	0	3.8642	0.5743	10.5309	0.00217651	0.0284568	up
Unigene0053792	0	0	0	0.5009	3.2867	0.6495	10.5304	5.75e-05	0.00182854	up
Unigene0059376	0	0	0	0	3.6403	0.7944	10.5297	0.000613029	0.0108074	up
Unigene0064240	0	0	0	0.3628	3.8542	0.2171	10.5295	0.00112112	0.0172308	up
Unigene0026892	0	0	0	0.2212	3.5943	0.6178	10.5292	0.00155954	0.0220265	up
Unigene0036992	0	0	0	0.2066	2.8839	1.3397	10.5282	4.09e-07	5.58e-05	up
Unigene0061546	0	0	0	0	2.3925	2.0367	10.5279	0.0012574	0.0187524	up
Unigene0057817	0	0	0	0.3476	3.5717	0.5085	10.5274	8.1e-05	0.00234952	up
Unigene0041553	0	0	0	0	4.2443	0.1767	10.5252	0.00312653	0.0374462	up
Unigene0011253	0	0	0	0.2326	3.5848	0.6031	10.525	0.000104599	0.00284821	up
Unigene0031404	0	0	0	0.512	2.4744	1.43	10.5237	6.62e-06	0.000370768	up
Unigene0009997	0	0	0	0	3.0756	1.3389	10.5231	0.000834839	0.013751	up
Unigene0043228	0	0	0	0.538	3.3106	0.5614	10.5216	6.26e-06	0.000356936	up
Unigene0017659	0	0	0	0.6349	2.9624	0.8106	10.5209	0.00105184	0.016444	up
Unigene0020339	0	0	0	0.7417	2.7192	0.947	10.5209	0.00148038	0.021153	up
Unigene0055227	0	0	0	0.4144	3.5911	0.3968	10.5191	1.55e-05	0.000702163	up
Unigene0014823	0	0	0	0.4862	3.3569	0.5543	10.5175	0.000130223	0.00333001	up
Unigene0008989	0	0	0	0.3702	2.6219	1.4032	10.5168	0.000284695	0.00597385	up
Unigene0062020	0	0	0	0.5952	3.7195	0.0792	10.5163	0.00208424	0.0274754	up
Unigene0064819	0	0	0	0.9186	3.0617	0.4073	10.5143	0.000574716	0.0102528	up
Unigene0043284	0	0	0	0.2235	3.5391	0.6244	10.5141	0.00165193	0.0230218	up
Unigene0048154	0	0	0	0.5236	3.5994	0.2611	10.5131	0.000195545	0.00449028	up
Unigene0001141	0	0	0	0.8299	3.1118	0.4415	10.5128	8.98e-05	0.00252976	up
Unigene0008429	0	0	0	0.9255	3.1617	0.2954	10.5126	0.000519538	0.0094732	up
Unigene0023842	0	0	0	0.5062	2.892	0.9809	10.5115	7.98e-05	0.0023208	up
Unigene0017811	0	0	0	0.7911	2.7192	0.8681	10.5112	0.000279958	0.00591052	up
Unigene0068479	0	0	0	0.8503	3.1882	0.3393	10.511	0.00252694	0.0318775	up
Unigene0023840	0	0	0	0.4511	3.4766	0.4499	10.511	6.05e-05	0.00190961	up
Unigene0058497	0	0	0	0.1918	3.0366	1.1479	10.5105	0.00068428	0.0117763	up
Unigene0063727	0	0	0	0.6445	3.0881	0.6429	10.5103	0.000171603	0.00406085	up
Unigene0033457	0	0	0	0.9843	2.358	1.0309	10.5095	1.17e-05	0.000567995	up
Unigene0056802	0	0	0	0.681	3.2299	0.4598	10.5087	2.43e-05	0.000977277	up
Unigene0025628	0	0	0	0.2405	2.3044	1.8231	10.5078	0.00114885	0.017533	up
Unigene0007047	0	0	0	1.019	3.1842	0.1626	10.5071	5.22e-05	0.00170444	up
Unigene0016307	0	0	0	0.0556	3.2426	1.0647	10.5061	0.000182919	0.00427138	up
Unigene0000711	0	0	0	0.1497	3.4934	0.7169	10.5051	0.000425947	0.0082077	up
Unigene0010203	0	0	0	0.3463	3.3664	0.6448	10.5043	0.00143403	0.0206477	up
Unigene0017534	0	0	0	0.3607	3.707	0.2879	10.5037	0.00257718	0.0323693	up
Unigene0021377	0	0	0	0.5016	3.2242	0.629	10.5034	0.000127715	0.00328996	up
Unigene0060131	0	0	0	0.4304	3.4071	0.5152	10.5027	0.0010885	0.0168911	up
Unigene0018564	0	0	0	0.1374	3.5496	0.658	10.5002	0.00419729	0.0473621	up
Unigene0007768	0	0	0	0.4999	3.6447	0.1995	10.4999	0.00312812	0.0374462	up
Unigene0063560	0	0	0	1.2547	1.9864	1.1014	10.4993	0.000472986	0.00884447	up
Unigene0071942	0	0	0	0.9371	3.1233	0.2804	10.4988	0.00134754	0.0197672	up
Unigene0017179	0	0	0	1.7593	1.8483	0.7325	10.4986	4.83e-05	0.0016004	up
Unigene0070883	0	0	0	0.2519	3.0788	1.0052	10.4972	0.000364766	0.00726345	up
Unigene0067938	0	0	0	0.0959	3.4361	0.8036	10.4971	8.12e-05	0.00235093	up
Unigene0000534	0	0	0	0.3968	3.2512	0.6861	10.4966	0.000101521	0.00278234	up
Unigene0014057	0	0	0	0.4556	2.7842	1.0908	10.4954	0.00237329	0.0303931	up
Unigene0054971	0	0	0	0.445	3.6462	0.2367	10.4945	0.000436447	0.00833486	up
Unigene0062059	0	0	0	0.4979	3.6304	0.1987	10.4942	0.00312828	0.0374462	up
Unigene0022157	0	0	0	1.2035	2.8832	0.2401	10.4941	0.00325164	0.0385924	up
Unigene0053928	0	0	0	0.4799	2.9706	0.8754	10.4938	7.77e-05	0.00227424	up
Unigene0060529	0	0	0	0.4397	3.1139	0.7719	10.4937	7.81e-06	0.00041502	up
Unigene0007600	0	0	0	0.1884	3.6104	0.5262	10.4935	0.00114338	0.0174794	up
Unigene0017258	0	0	0	0.512	3.1996	0.6129	10.4934	0.00166758	0.023192	up
Unigene0034302	0	0	0	0.8657	2.7652	0.6909	10.4925	0.00161769	0.0226417	up
Unigene0021489	0	0	0	0.6966	3.0679	0.5559	10.492	0.000520196	0.00948037	up
Unigene0020240	0	0	0	0.2736	2.7362	1.3102	10.4919	0.0019877	0.0264456	up
Unigene0070771	0	0	0	0.1473	4.1117	0.0588	10.4911	0.0019314	0.0258675	up
Unigene0065972	0	0	0	0.6212	3.0022	0.694	10.491	4.29e-05	0.00146498	up
Unigene0015049	0	0	0	0.1368	3.3063	0.8735	10.4907	0.0036298	0.0422132	up
Unigene0068573	0	0	0	0.0671	2.9638	1.2853	10.4906	0.000321132	0.00657136	up
Unigene0068665	0	0	0	0.2247	3.4174	0.6725	10.49	8.72e-05	0.00247627	up
Unigene0010222	0	0	0	0.1963	3.3812	0.7312	10.4881	0.000191651	0.00442491	up
Unigene0035541	0	0	0	0	3.3318	0.9768	10.488	0.00192055	0.0257704	up
Unigene0071943	0	0	0	0.7491	2.8869	0.6725	10.488	0.000305702	0.00632956	up
Unigene0019698	0	0	0	0	4.3048	0	10.4868	0.00144603	0.0207748	up
Unigene0032918	0	0	0	0	4.1208	0.1836	10.4866	0.00168609	0.02335	up
Unigene0006542	0	0	0	0.7382	2.3067	1.2518	10.4841	0.000156328	0.00379227	up
Unigene0072188	0	0	0	0.1671	3.0626	1.0666	10.4839	0.00048569	0.00901285	up
Unigene0015066	0	0	0	0.3907	1.8719	2.0265	10.4815	0.00033732	0.00681807	up
Unigene0054572	0	0	0	0.1739	3.6958	0.4164	10.4805	0.00104731	0.0163946	up
Unigene0051883	0	0	0	0.9754	2.8814	0.4245	10.4789	0.000313745	0.0064644	up
Unigene0026656	0	0	0	0.1898	3.5978	0.4922	10.4784	6.59e-05	0.00202414	up
Unigene0037673	0	0	0	0.6871	3.2633	0.329	10.4782	0.000164368	0.00393285	up
Unigene0015850	0	0	0	0.256	3.2849	0.7354	10.4772	4.44e-05	0.00149936	up
Unigene0037561	0	0	0	0.1483	2.3484	1.7756	10.4758	0.00349944	0.0409929	up
Unigene0023786	0	0	0	1.2248	2.6365	0.4073	10.4746	1.31e-05	0.00061559	up
Unigene0067487	0	0	0	0.249	3.3711	0.6457	10.4736	0.000140191	0.00351097	up
Unigene0030191	0	0	0	0.532	3.3986	0.3302	10.4719	9.93e-05	0.00273902	up
Unigene0024501	0	0	0	0.3871	1.5053	2.3684	10.4719	0.00125321	0.0187095	up
Unigene0041354	0	0	0	0.1383	3.5152	0.6071	10.4719	0.000387334	0.00761361	up
Unigene0070551	0	0	0	0.3911	2.7699	1.0923	10.4694	6.07e-05	0.00191198	up
Unigene0037397	0	0	0	0	3.9599	0.2917	10.4688	0.00161421	0.0226074	up
Unigene0008781	0	0	0	0.778	2.8525	0.6209	10.4688	0.00264464	0.0330086	up
Unigene0030890	0	0	0	0.5745	2.8724	0.8023	10.468	0.00192737	0.0258273	up
Unigene0016560	0	0	0	1.1854	2.8535	0.2102	10.468	0.00247995	0.0314511	up
Unigene0062758	0	0	0	0.2868	3.4258	0.5341	10.4672	0.000959772	0.0153114	up
Unigene0028060	0	0	0	1.1187	2.68	0.4464	10.4666	0.00186512	0.025207	up
Unigene0054090	0	0	0	0.6224	3.2847	0.3311	10.4643	0.00103852	0.016289	up
Unigene0017705	0	0	0	0.2926	2.194	1.751	10.4641	0.00231625	0.0298596	up
Unigene0018415	0	0	0	0.5694	3.4397	0.2272	10.4636	0.000333337	0.00674804	up
Unigene0004414	0	0	0	2.2593	1.9767	0	10.4635	0.00417393	0.0471685	up
Unigene0029744	0	0	0	0.9069	2.9149	0.4136	10.4633	0.00163446	0.0228242	up
Unigene0070341	0	0	0	0	3.7869	0.4464	10.4626	0.00192249	0.0257834	up
Unigene0066212	0	0	0	1.0988	2.645	0.4871	10.4618	0.00100343	0.0158455	up
Unigene0009260	0	0	0	0.2995	2.4953	1.4338	10.461	0.00271256	0.0336167	up
Unigene0030987	0	0	0	0.5228	3.0495	0.6556	10.4608	0.000161007	0.00387048	up
Unigene0066836	0	0	0	0.2695	3.169	0.7886	10.4605	1.73e-06	0.000145102	up
Unigene0059894	0	0	0	0.1247	2.7541	1.3437	10.4589	0.000153474	0.00374073	up
Unigene0070177	0	0	0	0.4556	3.0373	0.7272	10.4581	0.00301344	0.0364399	up
Unigene0062843	0	0	0	0.5537	2.9987	0.6627	10.4564	0.000398454	0.00778979	up
Unigene0066987	0	0	0	0.3324	2.9081	0.9726	10.4557	3.71e-05	0.00132168	up
Unigene0025626	0	0	0	0	3.7149	0.4981	10.4557	0.00357729	0.0417535	up
Unigene0060007	0	0	0	0.1037	3.1982	0.9106	10.4555	0.00177146	0.0242285	up
Unigene0058639	0	0	0	0.115	3.5458	0.5507	10.4552	0.0030933	0.0371367	up
Unigene0030349	0	0	0	0.2602	2.6016	1.3496	10.4551	0.001783	0.0243582	up
Unigene0060508	0	0	0	1.0494	2.951	0.2093	10.4545	0.00262733	0.032854	up
Unigene0022302	0	0	0	1.4279	1.4644	1.3148	10.4536	0.000250256	0.00543547	up
Unigene0024432	0	0	0	2.1729	1.7319	0.3016	10.4534	0.000439436	0.00837634	up
Unigene0068173	0	0	0	0.1873	3.121	0.8967	10.4529	0.000832739	0.0137239	up
Unigene0066803	0	0	0	0.6613	2.6634	0.8796	10.4527	0.000579535	0.0103176	up
Unigene0071087	0	0	0	0.5908	3.2671	0.3429	10.4515	5.54e-05	0.00177725	up
Unigene0030298	0	0	0	0.091	2.7284	1.3791	10.4507	0.000959113	0.0153042	up
Unigene0069688	0	0	0	0.7797	3.0626	0.3555	10.4505	0.0011958	0.0180591	up
Unigene0053801	0	0	0	1.0581	2.2923	0.8444	10.4494	0.000350465	0.00704511	up
Unigene0053091	0	0	0	1.2245	2.6686	0.3007	10.4491	0.000512886	0.00938247	up
Unigene0069809	0	0	0	0.2799	3.4312	0.4786	10.4477	1.9e-05	0.00081419	up
Unigene0039434	0	0	0	0.3734	3.3192	0.4967	10.4475	0.00228268	0.0295063	up
Unigene0057089	0	0	0	0.5618	2.6528	0.9714	10.4464	0.000299158	0.00622279	up
Unigene0038186	0	0	0	0.1684	3.6132	0.4032	10.446	5.48e-05	0.00176875	up
Unigene0056043	0	0	0	0.6984	3.1211	0.3546	10.4423	0.000105272	0.00285864	up
Unigene0005789	0	0	0	0.3691	3.5677	0.2356	10.4417	0.000546181	0.00986629	up
Unigene0063300	0	0	0	0	3.391	0.7794	10.441	0.00224236	0.0291261	up
Unigene0069634	0	0	0	0.1595	2.9906	1.0183	10.4403	0.000463031	0.00871091	up
Unigene0039301	0	0	0	0.5291	3.2118	0.4222	10.4385	0.000267348	0.00570318	up
Unigene0057381	0	0	0	0	3.2335	0.929	10.4383	0.00183404	0.0248478	up
Unigene0048648	0	0	0	0.4645	2.5805	1.1121	10.4364	0.0025236	0.031841	up
Unigene0020172	0	0	0	0	3.3437	0.8125	10.4361	0.000891938	0.0144573	up
Unigene0019983	0	0	0	0.1684	3.7184	0.2688	10.4359	0.00135736	0.0198535	up
Unigene0039628	0	0	0	0.4902	3.3701	0.2934	10.4352	0.00264937	0.0330464	up
Unigene0025312	0	0	0	0.3794	3.3194	0.4541	10.4349	0.000149312	0.00366416	up
Unigene0054740	0	0	0	0	2.4541	1.6975	10.4345	0.00169806	0.0234569	up
Unigene0016561	0	0	0	0.5141	3.3196	0.3077	10.4309	0.00300676	0.036387	up
Unigene0026337	0	0	0	1.4764	1.9991	0.6627	10.4298	0.00018388	0.00428823	up
Unigene0035992	0	0	0	0.3702	3.4701	0.2954	10.429	0.00111178	0.0171434	up
Unigene0008923	0	0	0	0	3.615	0.5193	10.4285	0.00201966	0.0267914	up
Unigene0059678	0	0	0	1.2613	2.4523	0.4194	10.428	0.000602443	0.0106524	up
Unigene0009640	0	0	0	0	3.2377	0.8934	10.4273	0.001146	0.0175118	up
Unigene0065857	0	0	0	2.0793	1.386	0.6637	10.4266	0.00118181	0.0179058	up
Unigene0028207	0	0	0	0.3691	3.5369	0.2209	10.4259	0.00134793	0.0197688	up
Unigene0032009	0	0	0	0.3272	3.2722	0.5223	10.4241	0.000493226	0.00911846	up
Unigene0064836	0	0	0	0.3642	2.9333	0.8234	10.4238	7.06e-05	0.00212396	up
Unigene0038689	0	0	0	0.7641	3.299	0.0554	10.4229	0.000716666	0.012232	up
Unigene0028518	0	0	0	0.8503	2.3616	0.9047	10.4223	0.00140342	0.0203458	up
Unigene0020491	0	0	0	0.2581	3.5482	0.3089	10.4218	0.00433228	0.0484926	up
Unigene0008865	0	0	0	0.2048	3.4982	0.4086	10.4205	0.00192443	0.0258046	up
Unigene0009671	0	0	0	0.7558	3.2538	0.1005	10.42	0.00410587	0.0465386	up
Unigene0008047	0	0	0	0.6528	3.1958	0.2605	10.4196	0.000504648	0.00928896	up
Unigene0052295	0	0	0	0	3.5111	0.5978	10.4196	0.00385991	0.0442749	up
Unigene0013513	0	0	0	1.5514	1.8893	0.6666	10.419	0.000614939	0.0108251	up
Unigene0062323	0	0	0	1.0016	2.1186	0.9837	10.4178	6.33e-05	0.0019727	up
Unigene0016890	0	0	0	1.5465	2.0346	0.5196	10.4167	0.000129316	0.00331744	up
Unigene0056471	0	0	0	0.5851	3.0472	0.4669	10.4162	0.00328025	0.0388735	up
Unigene0023898	0	0	0	0.0876	3.1375	0.8735	10.416	6.1e-05	0.00191869	up
Unigene0056548	0	0	0	1.0224	2.8803	0.1943	10.4154	3.93e-05	0.00137206	up
Unigene0032660	0	0	0	0.213	3.3728	0.51	10.415	0.00193164	0.0258675	up
Unigene0017810	0	0	0	0.7429	2.8138	0.539	10.4149	8.67e-05	0.00247244	up
Unigene0009124	0	0	0	0.5261	3.288	0.2799	10.4143	0.000758364	0.0127892	up
Unigene0067126	0	0	0	1.3755	2.3805	0.3378	10.4143	0.000760154	0.0128092	up
Unigene0022357	0	0	0	0	3.1016	0.9901	10.4135	0.00414185	0.0468503	up
Unigene0034287	0	0	0	0	2.9302	1.1599	10.413	0.000350832	0.00704904	up
Unigene0027474	0	0	0	0.3935	3.1696	0.5234	10.4117	0.00277616	0.0342394	up
Unigene0072302	0	0	0	0.9789	2.2139	0.8927	10.4113	0.00125968	0.0187736	up
Unigene0025802	0	0	0	0.6858	2.694	0.7036	10.4106	0.000463122	0.00871091	up
Unigene0016724	0	0	0	0.7576	2.8407	0.4837	10.4101	0.00018446	0.00429759	up
Unigene0071791	0	0	0	0.1405	3.0429	0.8967	10.4094	0.00446347	0.0496437	up
Unigene0001023	0	0	0	0.6718	2.9389	0.4691	10.4093	0.000333442	0.00674824	up
Unigene0057947	0	0	0	0.4738	3.2898	0.3151	10.4089	0.000505659	0.00930022	up
Unigene0068155	0	0	0	0.2363	3.1504	0.6914	10.4087	0.00046516	0.00873223	up
Unigene0042617	0	0	0	0	3.5803	0.4898	10.4059	0.00373787	0.0432063	up
Unigene0017183	0	0	0	0.5989	2.8696	0.5974	10.4044	0.00304671	0.0367154	up
Unigene0061651	0	0	0	0.4378	3.1618	0.4659	10.4043	0.000271729	0.00578032	up
Unigene0062274	0	0	0	0.5771	1.8275	1.658	10.4032	0.000589738	0.0104714	up
Unigene0024500	0	0	0	0.5232	3.0519	0.4871	10.4031	0.000473732	0.00885381	up
Unigene0008758	0	0	0	0.2212	3.1335	0.7061	10.4026	0.00181292	0.0246314	up
Unigene0016611	0	0	0	0.2623	3.1696	0.628	10.4023	0.00314491	0.0375991	up
Unigene0001671	0	0	0	0.1744	2.9793	0.9047	10.4017	0.000710334	0.0121413	up
Unigene0022965	0	0	0	0.286	2.8595	0.9128	10.4017	0.00072974	0.0123909	up
Unigene0035069	0	0	0	0.0827	3.5129	0.4618	10.4014	0.00146457	0.0209823	up
Unigene0061661	0	0	0	0.4278	3.4221	0.2048	10.4004	0.00101101	0.0159176	up
Unigene0019971	0	0	0	0.3968	2.1491	1.504	10.3987	0.000448045	0.00849727	up
Unigene0048383	0	0	0	1.4651	1.8602	0.7238	10.3984	3.88e-05	0.00135792	up
Unigene0013768	0	0	0	0.1423	3.7362	0.1704	10.3984	0.00115197	0.0175546	up
Unigene0055959	0	0	0	0.2948	3.3574	0.3921	10.3967	0.00142694	0.0205704	up
Unigene0071412	0	0	0	0.1216	3.2429	0.6794	10.3966	0.00364647	0.0423612	up
Unigene0013945	0	0	0	0.6754	3.1515	0.2156	10.3961	0.00382926	0.0440077	up
Unigene0063205	0	0	0	0	2.9682	1.0739	10.3959	0.00197386	0.0263074	up
Unigene0029174	0	0	0	0.1357	2.7128	1.1908	10.3949	0.00357285	0.0417152	up
Unigene0022399	0	0	0	1.364	2.3764	0.2969	10.3942	0.00158343	0.0223025	up
Unigene0055980	0	0	0	0.2877	3.3562	0.3826	10.3903	0.0013528	0.0198106	up
Unigene0061388	0	0	0	0.6725	3.1381	0.2147	10.3899	0.00382837	0.0440045	up
Unigene0024902	0	0	0	1.3288	2.4605	0.2356	10.3898	0.00361941	0.0421441	up
Unigene0059728	0	0	0	0.2928	2.9281	0.7945	10.3864	8.43e-05	0.0024189	up
Unigene0048974	0	0	0	0.2529	3.056	0.7064	10.3863	0.00269683	0.0334738	up
Unigene0000905	0	0	0	0.5866	2.3354	1.0923	10.386	4.39e-05	0.00148886	up
Unigene0025249	0	0	0	1.5588	1.7712	0.6785	10.3839	0.00138368	0.0201186	up
Unigene0031869	0	0	0	0.5039	2.9389	0.5629	10.3829	0.000865214	0.0141454	up
Unigene0071021	0	0	0	0	3.1167	0.8874	10.3823	0.00429336	0.0481771	up
Unigene0064784	0	0	0	0.0618	3.4478	0.4928	10.3817	0.000577705	0.0102959	up
Unigene0021428	0	0	0	0.7936	3.1173	0.0905	10.3813	0.00313416	0.0374916	up
Unigene0051659	0	0	0	0.4044	2.9483	0.6454	10.3801	0.000927138	0.0148935	up
Unigene0024129	0	0	0	0.7558	2.3931	0.8444	10.3784	0.0022533	0.0292055	up
Unigene0023012	0	0	0	1.336	2.3155	0.3412	10.3782	2.68e-05	0.00105142	up
Unigene0037804	0	0	0	0.5099	2.8681	0.6104	10.3766	0.00203607	0.0269741	up
Unigene0054098	0	0	0	0.9258	2.5348	0.5277	10.3766	0.00168933	0.0233858	up
Unigene0059824	0	0	0	0.5103	3.2318	0.2444	10.3759	0.00161613	0.0226299	up
Unigene0056700	0	0	0	1.1757	2.0572	0.7506	10.3749	0.000674071	0.011635	up
Unigene0016131	0	0	0	0.5569	3.2483	0.1778	10.3747	0.00260326	0.0326062	up
Unigene0066019	0	0	0	0.1091	3.0904	0.7834	10.3746	0.00249031	0.0315595	up
Unigene0071411	0	0	0	1.3045	1.6305	1.041	10.3721	0.000341221	0.00688821	up
Unigene0072111	0	0	0	0.4083	2.4664	1.0996	10.3715	1.79e-05	0.000784901	up
Unigene0051484	0	0	0	0.5106	3.191	0.2716	10.3711	0.00075839	0.0127892	up
Unigene0013501	0	0	0	0.4703	2.9389	0.5629	10.3707	0.000310833	0.00641915	up
Unigene0013494	0	0	0	0.0664	3.3201	0.5829	10.3697	0.000659652	0.0114522	up
Unigene0055694	0	0	0	0.512	2.8441	0.6129	10.3696	0.000376889	0.00744704	up
Unigene0068567	0	0	0	1.2697	2.4687	0.2252	10.3676	0.00333468	0.0394216	up
Unigene0043841	0	0	0	0.6478	2.591	0.7238	10.3673	0.00152114	0.0216101	up
Unigene0020212	0	0	0	0.1759	3.2238	0.5614	10.3667	0.00109453	0.016949	up
Unigene0026650	0	0	0	2.2527	1.7065	0	10.366	0.00391212	0.0447451	up
Unigene0005812	0	0	0	0.1034	3.3601	0.4951	10.3658	0.00277545	0.0342366	up
Unigene0005443	0	0	0	0.3284	3.1923	0.4367	10.3654	0.00187417	0.0253007	up
Unigene0063573	0	0	0	0.4177	3.2715	0.2666	10.3648	0.000867155	0.0141707	up
Unigene0070522	0	0	0	1.0581	2.5568	0.3378	10.3637	0.000940299	0.015071	up
Unigene0061719	0	0	0	0.2243	3.4581	0.2685	10.363	0.00337688	0.0398483	up
Unigene0021844	0	0	0	0.2323	3.1611	0.5561	10.3625	0.000567056	0.0101565	up
Unigene0020207	0	0	0	0.538	2.7646	0.644	10.3614	0.000444332	0.00845143	up
Unigene0065003	0	0	0	0.1846	3.5369	0.2209	10.3599	0.00222918	0.0290081	up
Unigene0069506	0	0	0	1.0374	2.0745	0.8278	10.3589	0.000408746	0.00795178	up
Unigene0022304	0	0	0	0.407	2.8824	0.6495	10.3586	0.000156738	0.00380093	up
Unigene0052058	0	0	0	0.6005	2.788	0.5477	10.3576	0.000387122	0.00761334	up
Unigene0045657	0	0	0	0.1749	3.1332	0.628	10.3576	0.00101184	0.0159176	up
Unigene0053467	0	0	0	0	3.1677	0.7584	10.3539	0.00402464	0.0457458	up
Unigene0060807	0	0	0	1.3277	2.2126	0.3853	10.3537	0.00125602	0.0187424	up
Unigene0065791	0	0	0	0.2847	2.728	0.9087	10.3522	0.00356682	0.0416584	up
Unigene0060015	0	0	0	0.7145	2.6365	0.5702	10.3521	0.000698595	0.0119777	up
Unigene0058200	0	0	0	0.303	2.5882	1.0278	10.3513	0.000252373	0.00546656	up
Unigene0001764	0	0	0	0.3724	3.0251	0.52	10.3508	0.000865627	0.0141489	up
Unigene0064257	0	0	0	0.8651	1.8299	1.2214	10.3503	2.99e-05	0.00113434	up
Unigene0021416	0	0	0	1.1844	1.9739	0.7562	10.3496	0.000731531	0.0124179	up
Unigene0020150	0	0	0	0.7469	2.645	0.5215	10.3492	0.000486769	0.00902698	up
Unigene0063997	0	0	0	0.1924	2.645	1.0747	10.3488	0.00100896	0.0159018	up
Unigene0003924	0	0	0	0	3.688	0.2208	10.3475	0.00313487	0.0374916	up
Unigene0072134	0	0	0	1.0822	2.8253	0	10.3471	0.00167023	0.0232155	up
Unigene0064110	0	0	0	1.7367	2.1707	0	10.347	0.00340213	0.0400738	up
Unigene0064782	0	0	0	0.8942	2.6543	0.3568	10.3463	5.13e-05	0.00168209	up
Unigene0071067	0	0	0	0.2116	3.4385	0.2533	10.3456	0.00322334	0.0383325	up
Unigene0057442	0	0	0	0.3508	2.9227	0.6298	10.3455	0.000634991	0.0111019	up
Unigene0055121	0	0	0	0.1202	3.2061	0.5757	10.345	0.0039453	0.0450099	up
Unigene0010102	0	0	0	0.5989	3.1815	0.1195	10.3443	0.000785671	0.0131178	up
Unigene0015844	0	0	0	1.1015	1.9191	0.879	10.3441	0.000324052	0.00660852	up
Unigene0015723	0	0	0	0	3.6257	0.2719	10.3434	0.000183413	0.00427875	up
Unigene0054339	0	0	0	2.326	0.7981	0.7643	10.34	0.0017345	0.0238502	up
Unigene0024899	0	0	0	0.1907	2.8595	0.8368	10.3395	0.00109826	0.0169996	up
Unigene0033623	0	0	0	0.4991	2.828	0.5576	10.3386	0.000856688	0.0140336	up
Unigene0040781	0	0	0	0.7037	2.8665	0.312	10.3377	0.000395402	0.00774676	up
Unigene0070602	0	0	0	0.5685	3.1582	0.1512	10.3361	0.0016711	0.0232171	up
Unigene0064810	0	0	0	1.2007	2.3761	0.2994	10.3355	0.000230307	0.00507587	up
Unigene0068273	0	0	0	0.0971	3.2355	0.5423	10.335	0.00227933	0.0294684	up
Unigene0023201	0	0	0	0.2267	3.4637	0.1809	10.3336	0.00117406	0.0178269	up
Unigene0017370	0	0	0	2.1534	1.3956	0.3182	10.3321	0.000277409	0.00587419	up
Unigene0064614	0	0	0	0.3174	3.0418	0.5066	10.3316	0.00054186	0.00979859	up
Unigene0020660	0	0	0	0.7887	1.9714	1.1014	10.33	0.000318076	0.00653116	up
Unigene0009932	0	0	0	1.1661	2.591	0.1034	10.3296	0.00420851	0.0474426	up
Unigene0026678	0	0	0	0.5668	2.952	0.3393	10.3287	0.00423935	0.0476902	up
Unigene0026276	0	0	0	0.1283	3.4732	0.2559	10.3285	0.000745705	0.0126256	up
Unigene0042578	0	0	0	0.3062	3.0617	0.4887	10.3282	0.00159385	0.0223965	up
Unigene0013419	0	0	0	0.5218	3.3334	0	10.3276	0.00411341	0.0465888	up
Unigene0015992	0	0	0	0.7903	2.8535	0.2102	10.3272	0.00376311	0.0434003	up
Unigene0007469	0	0	0	0.3206	2.8498	0.6823	10.3267	0.00145901	0.0209152	up
Unigene0065227	0	0	0	0.2873	2.9921	0.5731	10.3266	0.000355341	0.00711722	up
Unigene0020777	0	0	0	0.5944	2.9719	0.2846	10.326	0.00246074	0.0312655	up
Unigene0025229	0	0	0	0.3956	1.3184	2.1307	10.3237	0.000547983	0.00989386	up
Unigene0064977	0	0	0	0.6249	3.0199	0.1995	10.3235	0.00358565	0.0418337	up
Unigene0068041	0	0	0	0.5878	2.0817	1.1727	10.3228	0.00209935	0.0276493	up
Unigene0058389	0	0	0	0.4668	2.7228	0.6519	10.3225	6.67e-05	0.00204882	up
Unigene0024045	0	0	0	0.471	3.218	0.1503	10.3217	0.00196685	0.026246	up
Unigene0006702	0	0	0	0.3239	2.4291	1.0856	10.3214	0.000107701	0.00290684	up
Unigene0054832	0	0	0	0.8199	2.8305	0.1869	10.3209	0.0026318	0.0328714	up
Unigene0018334	0	0	0	0.2772	3.0031	0.5531	10.3194	0.00427789	0.0480409	up
Unigene0035072	0	0	0	0.0616	3.7713	0	10.3193	0.000777978	0.0130247	up
Unigene0037590	0	0	0	0.2772	2.8876	0.6637	10.3176	0.00385072	0.0442047	up
Unigene0072286	0	0	0	0	3.133	0.6924	10.3164	0.00213969	0.02805	up
Unigene0049372	0	0	0	0	3.0996	0.7256	10.3164	0.00302696	0.0365602	up
Unigene0016308	0	0	0	0.1632	3.3318	0.3256	10.3146	0.00135031	0.0197836	up
Unigene0055487	0	0	0	0.0923	2.768	0.9573	10.3135	0.00152669	0.0216519	up
Unigene0072262	0	0	0	0.2886	3.1259	0.403	10.3134	0.000504257	0.00928415	up
Unigene0025544	0	0	0	0.2405	2.8053	0.7676	10.3119	0.00249074	0.0315595	up
Unigene0066278	0	0	0	1.066	2.3687	0.3781	10.3117	0.00150501	0.0214291	up
Unigene0010178	0	0	0	0.0998	2.9943	0.7169	10.311	0.00222388	0.0289601	up
Unigene0064469	0	0	0	0.4005	3.0038	0.3995	10.3083	0.00138762	0.0201574	up
Unigene0001953	0	0	0	0.1519	3.2272	0.4242	10.3081	0.000948534	0.0151692	up
Unigene0064719	0	0	0	0.2116	2.9095	0.6755	10.3055	0.00191174	0.0256806	up
Unigene0017035	0	0	0	0.6659	2.7745	0.3543	10.3048	0.00169858	0.0234596	up
Unigene0068909	0	0	0	0.6876	2.1007	1.0059	10.3046	0.000826523	0.0136433	up
Unigene0029998	0	0	0	0.5961	2.4836	0.7136	10.3043	0.00317105	0.0378297	up
Unigene0052554	0	0	0	0.2068	2.8432	0.7426	10.304	0.00168285	0.0233231	up
Unigene0052952	0	0	0	0.5922	1.8752	1.3233	10.3033	0.000905891	0.0146372	up
Unigene0020830	0	0	0	0.7558	2.8339	0.201	10.3033	0.00348413	0.040852	up
Unigene0022320	0	0	0	0.0486	3.1594	0.5819	10.303	0.000268333	0.00572081	up
Unigene0016585	0	0	0	0.7411	2.1098	0.9364	10.302	3.54e-05	0.00127929	up
Unigene0035292	0	0	0	0.0912	3.0402	0.6551	10.3017	0.0018755	0.0253139	up
Unigene0021537	0	0	0	0.335	2.4426	1.0026	10.2993	0.000399666	0.00780686	up
Unigene0026217	0	0	0	0.1969	2.9116	0.6676	10.2977	7.67e-05	0.00224988	up
Unigene0018506	0	0	0	0.2048	3.2423	0.3269	10.2969	0.000611715	0.0107869	up
Unigene0030789	0	0	0	0.0928	2.8616	0.8147	10.295	0.00177123	0.0242285	up
Unigene0034225	0	0	0	0.4484	2.3162	1.0018	10.294	0.000407681	0.00793617	up
Unigene0062740	0	0	0	0.6066	2.1901	0.9681	10.2934	0.000540426	0.00978448	up
Unigene0020485	0	0	0	0.4112	3.1521	0.1969	10.2916	0.00111796	0.0172043	up
Unigene0056310	0	0	0	0.0743	2.9733	0.7119	10.2914	0.000966745	0.0153748	up
Unigene0020862	0	0	0	0.9258	2.094	0.7388	10.291	0.00152223	0.0216185	up
Unigene0065438	0	0	0	0.1693	3.3856	0.2027	10.2906	0.00210673	0.0277109	up
Unigene0016683	0	0	0	0.6128	2.6552	0.489	10.2904	0.00196495	0.0262401	up
Unigene0064436	0	0	0	0.075	3.5017	0.1797	10.2902	0.00224403	0.0291326	up
Unigene0057516	0	0	0	0.5225	2.5035	0.7297	10.2899	0.0020774	0.0274155	up
Unigene0024341	0	0	0	0.2607	2.6613	0.8322	10.2893	0.000191182	0.00441978	up
Unigene0020213	0	0	0	0.9069	1.2955	1.5509	10.289	0.000971346	0.0154377	up
Unigene0022366	0	0	0	1.4479	1.949	0.3555	10.2886	0.00109582	0.0169654	up
Unigene0068270	0	0	0	1.1337	2.4141	0.201	10.2873	0.00285693	0.0349713	up
Unigene0054702	0	0	0	0.4334	2.7082	0.6052	10.2865	0.00138201	0.0201046	up
Unigene0064463	0	0	0	1.2318	2.0528	0.4537	10.2832	0.000485051	0.00900907	up
Unigene0063179	0	0	0	0.761	2.6269	0.347	10.2819	0.00141893	0.0204879	up
Unigene0065325	0	0	0	1.0734	2.0445	0.6119	10.2799	0.00275021	0.0339895	up
Unigene0069353	0	0	0	0.2174	2.8986	0.6073	10.2774	0.00220631	0.0287711	up
Unigene0062960	0	0	0	0.3848	2.645	0.6909	10.2764	0.000904188	0.0146162	up
Unigene0032669	0	0	0	0.3931	2.6204	0.7058	10.2759	0.000961961	0.0153227	up
Unigene0071647	0	0	0	0.2167	3.0693	0.4323	10.2755	0.00270472	0.0335487	up
Unigene0023367	0	0	0	0.1953	2.1974	1.325	10.2752	0.00104102	0.0163211	up
Unigene0059813	0	0	0	0.1134	1.7948	1.8094	10.2752	0.00243355	0.0310099	up
Unigene0054975	0	0	0	0.3164	2.812	0.5891	10.2752	0.00158519	0.0223138	up
Unigene0016325	0	0	0	1.2736	2.2858	0.1564	10.2745	0.00141203	0.0204171	up
Unigene0014433	0	0	0	0.5324	2.4398	0.7435	10.2745	0.000106552	0.00288607	up
Unigene0067231	0	0	0	1.3355	1.9688	0.4099	10.2739	0.000765949	0.0128875	up
Unigene0051495	0	0	0	0.112	2.7523	0.8488	10.2734	0.000204566	0.00464249	up
Unigene0021119	0	0	0	0.3272	2.795	0.5876	10.2722	0.000601595	0.0106424	up
Unigene0071402	0	0	0	0.3386	3.0329	0.3378	10.272	0.0010024	0.0158331	up
Unigene0042390	0	0	0	0.1293	2.909	0.6707	10.2719	0.000419198	0.00811116	up
Unigene0018970	0	0	0	1.5729	1.9063	0.2282	10.2712	0.00375615	0.0433688	up
Unigene0069246	0	0	0	0.8093	2.3228	0.5741	10.2708	0.000412077	0.00799491	up
Unigene0028594	0	0	0	0.3587	2.914	0.4293	10.2691	0.00102837	0.0161377	up
Unigene0068012	0	0	0	0.1142	2.9495	0.6378	10.2689	0.00365026	0.042379	up
Unigene0015235	0	0	0	0.1001	2.7952	0.7991	10.2662	0.000145897	0.00360376	up
Unigene0070051	0	0	0	1.3272	1.6589	0.7061	10.2653	0.000613446	0.0108111	up
Unigene0017599	0	0	0	0.4574	2.2105	1.022	10.2644	0.000463674	0.00871345	up
Unigene0017608	0	0	0	0.5346	2.7285	0.4266	10.2643	0.00020572	0.00465837	up
Unigene0035990	0	0	0	0.7214	2.0038	0.9595	10.2624	0.00101356	0.0159393	up
Unigene0003389	0	0	0	0	2.8053	0.8773	10.2615	0.00177861	0.0243171	up
Unigene0031403	0	0	0	0.3895	2.5152	0.777	10.2612	0.000889801	0.0144303	up
Unigene0039802	0	0	0	0.3968	2.7277	0.5541	10.26	0.00115695	0.0176192	up
Unigene0037246	0	0	0	0.481	3.0057	0.1919	10.26	0.00401752	0.0457104	up
Unigene0049832	0	0	0	0.3473	2.7202	0.6097	10.2594	0.00027946	0.00590267	up
Unigene0025067	0	0	0	0.6977	2.4222	0.5567	10.2592	0.0014089	0.0203902	up
Unigene0054361	0	0	0	0.9405	2.547	0.1876	10.2586	0.0028197	0.0346337	up
Unigene0072270	0	0	0	0.7558	2.4141	0.5026	10.2576	0.00201811	0.0267757	up
Unigene0062704	0	0	0	0.6349	1.9397	1.0977	10.2575	0.000627272	0.0109903	up
Unigene0060077	0	0	0	0.0889	2.5191	1.0643	10.2575	0.0014222	0.0205186	up
Unigene0025888	0	0	0	0.6459	1.8454	1.1782	10.2564	0.000331059	0.00671706	up
Unigene0053098	0	0	0	1.0542	2.1472	0.4674	10.2561	0.00135442	0.0198276	up
Unigene0016172	0	0	0	0.7107	2.7634	0.189	10.2539	0.00325875	0.0386577	up
Unigene0059828	0	0	0	0.3702	2.699	0.5908	10.2527	0.000927152	0.0148935	up
Unigene0058363	0	0	0	0.9537	2.2704	0.4349	10.2523	0.00249907	0.0316203	up
Unigene0068091	0	0	0	0.3649	2.1282	1.1647	10.2518	0.000524365	0.00954666	up
Unigene0061515	0	0	0	0.481	2.5047	0.6717	10.2516	0.00195551	0.0261432	up
Unigene0069001	0	0	0	0.2921	2.3529	1.0101	10.2507	0.000941806	0.0150884	up
Unigene0019481	0	0	0	0.3042	2.5352	0.8093	10.2482	0.00125204	0.0186993	up
Unigene0070681	0	0	0	0.6349	2.7962	0.2171	10.248	0.00122786	0.0184333	up
Unigene0007916	0	0	0	0.9258	1.8735	0.8444	10.2462	0.00149853	0.0213497	up
Unigene0009048	0	0	0	1.1844	2.27	0.189	10.2461	0.00253959	0.0320026	up
Unigene0036204	0	0	0	0.1648	2.9516	0.5259	10.2457	6.57e-06	0.000369934	up
Unigene0017186	0	0	0	0.7086	2.4797	0.4523	10.245	0.00365167	0.0423874	up
Unigene0058323	0	0	0	0.5079	2.116	1.0133	10.2437	0.00163979	0.022881	up
Unigene0016981	0	0	0	0.4641	3.0936	0.0741	10.2415	0.00297406	0.0360655	up
Unigene0069168	0	0	0	0.8626	1.8688	0.8949	10.2393	0.000221038	0.0049123	up
Unigene0066070	0	0	0	0.6464	2.6929	0.2866	10.2392	0.000377442	0.00745025	up
Unigene0025637	0	0	0	0.4902	2.451	0.6846	10.2391	0.00192715	0.0258273	up
Unigene0068484	0	0	0	1.4056	1.6592	0.5608	10.239	0.0010223	0.0160626	up
Unigene0057761	0	0	0	1.6982	1.0885	0.834	10.2371	0.00136787	0.0199675	up
Unigene0058216	0	0	0	0.1262	2.787	0.705	10.2361	0.000396827	0.00776619	up
Unigene0066407	0	0	0	0.6349	2.645	0.3378	10.2359	0.00169787	0.0234569	up
Unigene0007249	0	0	0	0.7558	2.0152	0.8444	10.235	0.00260332	0.0326062	up
Unigene0057607	0	0	0	0.2995	2.121	1.1949	10.235	0.00410859	0.0465621	up
Unigene0030016	0	0	0	0.5668	2.5191	0.5277	10.2343	0.000788697	0.013152	up
Unigene0026552	0	0	0	0.7964	2.1805	0.6356	10.2338	0.00111209	0.0171434	up
Unigene0027040	0	0	0	1.4633	1.8759	0.2695	10.2323	0.00162847	0.0227716	up
Unigene0071017	0	0	0	0.5344	2.0483	1.0235	10.2313	0.000843337	0.0138572	up
Unigene0057861	0	0	0	0.5865	2.1991	0.819	10.2307	0.000165943	0.00396259	up
Unigene0015898	0	0	0	0	2.898	0.7049	10.23	0.00105612	0.0165074	up
Unigene0068700	0	0	0	0.3809	1.9044	1.3172	10.2298	0.00197402	0.0263074	up
Unigene0059264	0	0	0	0.2212	2.6727	0.7061	10.2288	0.00232693	0.0299382	up
Unigene0023514	0	0	0	0.6837	2.6043	0.3118	10.2287	0.00126231	0.0188011	up
Unigene0019092	0	0	0	0.3082	2.0544	1.2297	10.2257	0.00446759	0.0496443	up
Unigene0021745	0	0	0	0.5798	2.7779	0.2313	10.2244	0.000527916	0.00959854	up
Unigene0057484	0	0	0	0.0939	2.8954	0.5996	10.2244	0.00237236	0.0303866	up
Unigene0019996	0	0	0	0.2679	2.6785	0.6413	10.2239	0.00416052	0.0470392	up
Unigene0062521	0	0	0	0.5835	2.7228	0.2794	10.2231	0.00280408	0.0345008	up
Unigene0015767	0	0	0	0.1202	2.5047	0.9595	10.2226	0.00372083	0.0430232	up
Unigene0031425	0	0	0	0.6673	2.3829	0.5325	10.2219	0.000749849	0.0126802	up
Unigene0020981	0	0	0	0.553	2.7648	0.2648	10.2218	0.00246092	0.0312655	up
Unigene0071679	0	0	0	0.234	2.5995	0.7469	10.2209	0.00057965	0.0103176	up
Unigene0071053	0	0	0	0.481	2.9055	0.1919	10.2201	0.00429728	0.0482134	up
Unigene0072018	0	0	0	0.811	2.0272	0.7396	10.2199	0.00107305	0.0167211	up
Unigene0021915	0	0	0	0.8657	2.4046	0.307	10.2197	0.00100061	0.0158118	up
Unigene0072060	0	0	0	0.9174	2.2934	0.3661	10.2195	0.00067285	0.0116167	up
Unigene0017090	0	0	0	0.4031	2.771	0.4021	10.2192	0.0016567	0.0230702	up
Unigene0030471	0	0	0	0.4122	2.061	1.0966	10.2167	0.00258926	0.0324925	up
Unigene0051849	0	0	0	0.8541	2.3722	0.3408	10.2156	0.00397279	0.0452804	up
Unigene0066231	0	0	0	1.1244	2.2342	0.2071	10.215	0.000791611	0.0131883	up
Unigene0071355	0	0	0	0.5253	2.5012	0.539	10.2149	0.000309576	0.00639686	up
Unigene0066611	0	0	0	0.1788	2.4587	0.9276	10.2148	0.00105024	0.0164297	up
Unigene0031552	0	0	0	0.992	2.0074	0.5654	10.2146	0.0025164	0.0317836	up
Unigene0058141	0	0	0	1.0883	2.0404	0.4343	10.2139	0.000506024	0.00930043	up
Unigene0054816	0	0	0	0.354	2.2615	0.9417	10.2116	0.00190456	0.0256308	up
Unigene0027643	0	0	0	0.1051	2.2772	1.1743	10.2113	0.00244909	0.0311582	up
Unigene0068705	0	0	0	0.5814	2.3253	0.6495	10.2112	0.00152133	0.0216101	up
Unigene0020434	0	0	0	0.1856	2.6295	0.7407	10.211	0.00140009	0.0203057	up
Unigene0057160	0	0	0	0.325	2.7985	0.4323	10.211	0.00243474	0.0310196	up
Unigene0062978	0	0	0	0.8579	1.4297	1.2639	10.2093	4.69e-05	0.00156386	up
Unigene0035876	0	0	0	0.6901	2.53	0.3304	10.2088	0.00440654	0.0491094	up
Unigene0053320	0	0	0	0.4567	2.664	0.4252	10.207	0.00047392	0.00885502	up
Unigene0072287	0	0	0	0.2645	2.7185	0.5629	10.207	0.00108389	0.016846	up
Unigene0007037	0	0	0	0.1941	2.2648	1.0845	10.206	0.00129701	0.0192024	up
Unigene0066320	0	0	0	0.7636	1.9088	0.8705	10.2058	0.000774193	0.0129855	up
Unigene0052942	0	0	0	0.7667	1.9167	0.8566	10.2046	0.000157353	0.00380728	up
Unigene0015186	0	0	0	0.7667	1.9167	0.8566	10.2046	0.00280731	0.0345214	up
Unigene0019766	0	0	0	0.23	2.3	1.0096	10.2044	0.00222586	0.0289701	up
Unigene0063183	0	0	0	0.7469	2.4894	0.298	10.2022	0.00314915	0.037631	up
Unigene0014447	0	0	0	0.6462	2.6921	0.1934	10.2012	0.000901348	0.0145801	up
Unigene0053236	0	0	0	1.0142	2.1126	0.4047	10.2011	0.000940558	0.0150718	up
Unigene0009991	0	0	0	1.5237	1.7986	0.2027	10.1984	0.0030838	0.0370537	up
Unigene0070155	0	0	0	0.4052	2.3636	0.7545	10.1977	0.00318375	0.0379246	up
Unigene0020028	0	0	0	0	2.945	0.5745	10.1962	0.00214141	0.0280643	up
Unigene0056013	0	0	0	0.3476	2.7995	0.3698	10.1951	0.00340211	0.0400738	up
Unigene0065839	0	0	0	0.156	2.8595	0.4979	10.1937	0.00109442	0.016949	up
Unigene0016019	0	0	0	0.7333	2.4442	0.3344	10.1931	0.00152517	0.0216433	up
Unigene0009249	0	0	0	0.2396	2.6949	0.5735	10.1915	0.00363041	0.0422132	up
Unigene0027807	0	0	0	1.3902	1.9307	0.1849	10.1906	0.00258504	0.0324509	up
Unigene0057671	0	0	0	1.105	1.7578	0.6413	10.1899	0.000582751	0.0103575	up
Unigene0017026	0	0	0	0.429	1.8765	1.1981	10.1897	0.00100616	0.0158786	up
Unigene0068678	0	0	0	0.758	2.2897	0.4537	10.1888	0.000823384	0.0136072	up
Unigene0069160	0	0	0	0.4057	2.3661	0.7284	10.1883	0.00114771	0.0175269	up
Unigene0060444	0	0	0	0.8727	2.0906	0.5223	10.1822	0.0011577	0.0176196	up
Unigene0017016	0	0	0	0.512	2.645	0.3269	10.1815	0.00191196	0.0256806	up
Unigene0044110	0	0	0	0.8818	2.2858	0.3127	10.18	0.00112926	0.0173151	up
Unigene0062994	0	0	0	1.0051	1.5354	0.9357	10.1783	0.000196744	0.0045106	up
Unigene0061523	0	0	0	0.2243	2.8039	0.4475	10.1781	0.00349813	0.0409894	up
Unigene0014457	0	0	0	1.6338	1.6531	0.1863	10.1771	0.00254626	0.0320574	up
Unigene0019331	0	0	0	0.3033	2.4428	0.7261	10.1767	0.00142859	0.0205859	up
Unigene0028050	0	0	0	0.0698	3.4007	0	10.176	0.00120869	0.0182134	up
Unigene0029978	0	0	0	0.0934	2.3338	1.0431	10.1759	0.00189645	0.0255487	up
Unigene0000447	0	0	0	0.3386	2.116	1.0133	10.1749	0.000509016	0.00932425	up
Unigene0065051	0	0	0	0.5092	2.6874	0.2709	10.1747	0.00103879	0.0162896	up
Unigene0010046	0	0	0	1.7314	1.042	0.6909	10.1734	0.000492521	0.00911012	up
Unigene0017924	0	0	0	0.5789	2.653	0.231	10.1728	0.00181581	0.0246519	up
Unigene0009030	0	0	0	0.1262	2.5766	0.7554	10.1708	0.000435961	0.00833002	up
Unigene0013547	0	0	0	0.3239	2.2267	0.9047	10.1696	0.000475503	0.00887535	up
Unigene0060746	0	0	0	0.379	3.0003	0.0756	10.1695	0.00388283	0.0444668	up
Unigene0014786	0	0	0	0.5628	2.5325	0.3593	10.1693	0.00231112	0.0298257	up
Unigene0052505	0	0	0	0.9619	2.3155	0.1706	10.1666	0.00247972	0.0314511	up
Unigene0053834	0	0	0	1.4056	1.8544	0.1869	10.1661	0.00282214	0.0346423	up
Unigene0001174	0	0	0	0.0945	2.5978	0.7539	10.1658	0.002353	0.0301947	up
Unigene0063947	0	0	0	0.2098	2.5634	0.6695	10.1644	0.000469652	0.00879586	up
Unigene0072103	0	0	0	0.5789	2.0903	0.7699	10.1629	0.000706093	0.0120774	up
Unigene0027520	0	0	0	0.249	2.5931	0.596	10.1624	0.0038514	0.0442055	up
Unigene0016563	0	0	0	0.4087	2.1569	0.8697	10.1613	0.0032276	0.0383642	up
Unigene0069986	0	0	0	0.1034	2.5847	0.7426	10.1593	0.00321067	0.0382135	up
Unigene0061878	0	0	0	1.3413	1.4901	0.5946	10.1573	0.00303634	0.0366181	up
Unigene0071018	0	0	0	0.5745	2.1543	0.6877	10.1533	0.00374507	0.0432687	up
Unigene0028676	0	0	0	0.3295	2.5169	0.5697	10.1532	0.000122186	0.00318202	up
Unigene0038327	0	0	0	0.0778	2.5931	0.745	10.1531	0.00135824	0.0198592	up
Unigene0015718	0	0	0	0.1972	1.5607	1.652	10.1506	0.0013381	0.0196729	up
Unigene0007398	0	0	0	0.3794	2.4237	0.6055	10.15	0.00325089	0.0385899	up
Unigene0020971	0	0	0	0.3476	2.3168	0.7396	10.1481	0.00235478	0.0302099	up
Unigene0030149	0	0	0	1.2869	1.4297	0.6846	10.1469	0.00241361	0.0308051	up
Unigene0014462	0	0	0	0.7456	2.3965	0.255	10.1451	0.00216059	0.0282795	up
Unigene0055573	0	0	0	0.2015	2.3091	0.8846	10.1443	8.79e-05	0.00248972	up
Unigene0052055	0	0	0	0.5103	2.7216	0.1629	10.1441	0.00315916	0.0377332	up
Unigene0059470	0	0	0	0.6058	1.9181	0.8702	10.1439	0.00159356	0.0223965	up
Unigene0070673	0	0	0	0.62	2.3764	0.3958	10.143	0.00310168	0.0372136	up
Unigene0071613	0	0	0	0.0925	2.9303	0.3693	10.143	0.00340394	0.040082	up
Unigene0059379	0	0	0	0.2041	2.1262	1.0589	10.1418	0.00178548	0.0243778	up
Unigene0017883	0	0	0	0.6085	2.5352	0.2428	10.1406	0.00206402	0.027279	up
Unigene0031258	0	0	0	0.3341	2.7842	0.2666	10.1399	0.00401907	0.0457149	up
Unigene0024034	0	0	0	0	2.4934	0.8896	10.1391	0.00136345	0.019911	up
Unigene0055813	0	0	0	0.2461	2.1529	0.9818	10.1382	0.00317678	0.0378603	up
Unigene0034845	0	0	0	0.2623	2.7689	0.3489	10.1379	0.00169633	0.0234506	up
Unigene0065048	0	0	0	0.1556	2.7876	0.4346	10.1369	0.00133309	0.0196233	up
Unigene0035151	0	0	0	0.1835	2.6756	0.5125	10.1343	0.00197236	0.0262997	up
Unigene0024823	0	0	0	0.5745	1.0772	1.7193	10.134	0.00284274	0.0348273	up
Unigene0060692	0	0	0	0.1348	2.7517	0.484	10.1338	0.000797032	0.0132663	up
Unigene0051763	0	0	0	0.7309	1.3051	1.3332	10.1332	0.000683467	0.0117661	up
Unigene0030655	0	0	0	0.1749	2.7689	0.4187	10.1304	0.00193215	0.0258695	up
Unigene0006695	0	0	0	0.4191	2.2696	0.6688	10.1282	0.00154063	0.0218023	up
Unigene0056668	0	0	0	0.8353	1.7401	0.7777	10.1263	0.00232554	0.0299297	up
Unigene0069019	0	0	0	0.7594	1.139	1.4544	10.1262	0.0026551	0.0330989	up
Unigene0027015	0	0	0	0.89	2.163	0.2959	10.1245	0.000411939	0.00799453	up
Unigene0066700	0	0	0	0.1189	2.2785	0.9487	10.1233	0.00434948	0.0486207	up
Unigene0037017	0	0	0	0.4696	2.4259	0.4497	10.1229	0.00123601	0.0185286	up
Unigene0057335	0	0	0	0.3968	2.3144	0.6333	10.1226	0.00384105	0.044122	up
Unigene0057562	0	0	0	0.9851	2.0066	0.3494	10.1211	0.00160242	0.0224781	up
Unigene0026605	0	0	0	0.3908	2.1791	0.7676	10.1196	1.88e-06	0.000153226	up
Unigene0070373	0	0	0	3.0277	0.1577	0.151	10.1191	0.000431878	0.00828507	up
Unigene0026482	0	0	0	0.4177	2.0012	0.9166	10.1187	0.00123961	0.0185438	up
Unigene0032845	0	0	0.1134	0.2152	70.9669	54.7413	10.1169	9.88e-09	4.76e-06	up
Unigene0020871	0	0	0	0.513	2.458	0.3582	10.116	0.000291921	0.00610407	up
Unigene0029665	0	0	0	0.5589	2.1421	0.6244	10.1143	0.00163406	0.0228232	up
Unigene0020595	0	0	0	0.2095	2.1823	0.9196	10.1083	0.00207817	0.0274156	up
Unigene0031871	0	0	0	0.4214	1.8726	1.0088	10.1045	0.00357349	0.0417159	up
Unigene0029334	0	0	0	0.4105	1.2541	1.6378	10.1043	0.00296337	0.0359613	up
Unigene0062292	0	0	0	0.184	2.53	0.5874	10.1039	0.00191192	0.0256806	up
Unigene0016792	0	0	0	0.2022	2.6113	0.484	10.1022	0.00276481	0.0341288	up
Unigene0014507	0	0	0	0.1102	2.5715	0.6157	10.1022	0.00441725	0.0491829	up
Unigene0062181	0	0	0	0.7214	1.9036	0.6717	10.1018	0.0018255	0.0247415	up
Unigene0023445	0	0	0	0.7262	1.9881	0.5795	10.1006	0.00111174	0.0171434	up
Unigene0056212	0	0	0	1.2024	1.603	0.4798	10.0968	0.0017937	0.0244581	up
Unigene0068537	0	0	0	0.7447	2.0943	0.4457	10.0966	0.000857552	0.0140393	up
Unigene0055767	0	0	0	0.3143	2.6188	0.3511	10.0964	0.000420209	0.00812197	up
Unigene0019945	0	0	0	0.3438	2.4827	0.4572	10.0961	0.00316085	0.0377394	up
Unigene0014839	0	0	0	1.4651	1.526	0.2923	10.096	0.00255782	0.0321767	up
Unigene0069916	0	0	0	0.6404	1.9819	0.657	10.0942	0.000675232	0.0116523	up
Unigene0056594	0	0	0	1.0863	1.7097	0.4816	10.0935	0.00185818	0.0251355	up
Unigene0067937	0	0	0	0.2879	2.759	0.2298	10.0931	0.00105859	0.0165388	up
Unigene0020152	0	0	0	0.5326	2.574	0.17	10.093	0.00358591	0.0418337	up
Unigene0035068	0	0	0	0.3797	2.5311	0.3636	10.0921	0.000777438	0.0130217	up
Unigene0057183	0	0	0	0.1936	1.6128	1.4674	10.0918	0.00146437	0.0209823	up
Unigene0071755	0	0	0	0.9998	1.8744	0.3989	10.0915	0.000506258	0.00930108	up
Unigene0016069	0	0	0	0.5608	1.6356	1.0741	10.0903	4.24e-05	0.00145252	up
Unigene0041825	0	0	0	0	3.2628	0	10.0869	0.00338125	0.0398693	up
Unigene0065787	0	0	0	0.2843	2.4476	0.5293	10.0862	0.00169769	0.0234569	up
Unigene0064717	0	0	0	0.2243	1.9627	1.0741	10.0862	0.00249834	0.0316203	up
Unigene0024959	0	0	0	1.2606	1.8143	0.1829	10.0847	0.00312845	0.0374462	up
Unigene0013491	0	0	0	0.2284	2.6165	0.41	10.0834	0.00032092	0.00657075	up
Unigene0014702	0	0	0	0	3.1267	0.1214	10.0804	0.00273084	0.0337908	up
Unigene0062110	0	0	0	0.2235	1.7695	1.2487	10.0776	0.00235675	0.0302245	up
Unigene0059204	0	0	0	0.0792	2.9023	0.2527	10.0742	0.00291735	0.0355292	up
Unigene0072132	0	0	0	0.8449	1.8103	0.5779	10.0737	0.00182056	0.0246884	up
Unigene0026100	0	0	0	0.3968	1.4878	1.3457	10.0725	0.000948965	0.0151727	up
Unigene0072115	0	0	0	0.3527	2.5715	0.2815	10.0615	0.00181516	0.0246519	up
Unigene0031263	0	0	0	0.4567	2.4737	0.2734	10.0606	0.00393678	0.0449371	up
Unigene0019774	0	0	0	0.2259	2.165	0.8113	10.0599	0.00310678	0.037248	up
Unigene0059162	0	0	0	0.0856	2.6379	0.4779	10.0595	0.00271445	0.0336344	up
Unigene0058530	0	0	0	0.1632	2.5158	0.521	10.0589	0.00151974	0.0216004	up
Unigene0021503	0	0	0	0.4584	2.1007	0.6401	10.0585	0.00223418	0.0290468	up
Unigene0057024	0	0	0	0.8638	2.2492	0.0862	10.0585	0.00440312	0.0490941	up
Unigene0020224	0	0	0	0.1423	2.2536	0.7952	10.0549	0.000752864	0.0127162	up
Unigene0061836	0	0	0	1.0839	1.6128	0.4943	10.0548	0.000299809	0.00623451	up
Unigene0058456	0	0	0	0.2044	2.4974	0.4892	10.0548	0.000681254	0.0117392	up
Unigene0068775	0	0	0	0.2055	2.6536	0.3279	10.053	0.00396478	0.0452026	up
Unigene0033741	0	0	0	0.4409	2.4797	0.2639	10.0519	0.00366739	0.0425286	up
Unigene0017395	0	0	0	1.024	1.6117	0.5448	10.0501	0.00146627	0.0209984	up
Unigene0057210	0	0	0	0.4388	1.3408	1.4008	10.05	0.00400101	0.0455731	up
Unigene0000693	0	0	0	0.7701	2.0675	0.3414	10.0494	0.000826123	0.0136399	up
Unigene0055471	0	0	0	0.5897	1.8834	0.7058	10.0493	0.000943411	0.0151007	up
Unigene0059746	0	0	0	0.4218	1.4939	1.2624	10.049	0.00126866	0.0188793	up
Unigene0061777	0	0	0	0.9367	1.9079	0.3322	10.0484	0.00160238	0.0224781	up
Unigene0057456	0	0	0	0.6754	2.5012	0	10.0483	0.00380538	0.0438174	up
Unigene0017839	0	0	0	0.1901	2.4549	0.5309	10.048	0.00236164	0.0302758	up
Unigene0062990	0	0	0	0.9455	1.6883	0.539	10.0466	0.00297433	0.0360655	up
Unigene0016013	0	0	0	0.6812	2.0434	0.4349	10.0405	0.00419314	0.0473484	up
Unigene0067537	0	0	0	0.2228	2.1346	0.7999	10.0395	0.00310724	0.037248	up
Unigene0060268	0	0	0	0.8481	2.0191	0.2901	10.0395	0.00335866	0.0396594	up
Unigene0016205	0	0	0	0.7454	1.9152	0.4957	10.0391	0.000140684	0.00351611	up
Unigene0065847	0	0	0	0.4738	2.6055	0.0756	10.0384	0.00418622	0.0472851	up
Unigene0021095	0	0	0	0	2.6728	0.48	10.0375	0.00317441	0.037848	up
Unigene0072301	0	0	0	0.3621	2.2126	0.5779	10.0374	0.00350916	0.0410719	up
Unigene0071893	0	0	0	0.3413	2.062	0.749	10.0372	0.000885176	0.0143801	up
Unigene0039528	0	0	0	0.2276	2.4649	0.454	10.0346	0.00427867	0.0480422	up
Unigene0018992	0	0	0	0.8002	1.7782	0.5676	10.0343	0.000607397	0.0107213	up
Unigene0021602	0	0	0	0.236	1.7699	1.13	10.0297	0.00320613	0.0381658	up
Unigene0003461	0	0	0	0.2667	2.3894	0.479	10.0293	0.000541887	0.00979859	up
Unigene0045701	0	0	0	0.4159	1.5015	1.2168	10.0289	0.00362333	0.0421538	up
Unigene0020954	0	0	0	0.184	1.9933	0.9545	10.0278	0.00165913	0.0230924	up
Unigene0068867	0	0	0	0.8465	2.116	0.1689	10.0276	0.00300598	0.0363864	up
Unigene0015491	0	0	0	0.5099	1.8058	0.8139	10.0268	0.00286874	0.0350617	up
Unigene0027369	0	0	0	1.3135	1.4593	0.3494	10.0234	0.00188305	0.0253974	up
Unigene0055750	0	0	0	0.4738	2.27	0.3781	10.0232	0.0038427	0.0441339	up
Unigene0032670	0	0	0	0.7242	2.0114	0.3853	10.0228	0.00296083	0.0359368	up
Unigene0059387	0	0	0	0.2417	2.551	0.3215	10.0197	0.00169662	0.0234506	up
Unigene0024195	0	0	0	0.4319	2.1592	0.517	10.0169	0.00231441	0.0298472	up
Unigene0017579	0	0	0	0.7969	1.7707	0.5299	10.0119	0.00321366	0.0382427	up
Unigene0060393	0	0	0	0.5204	1.9512	0.6229	10.0105	0.00374443	0.0432682	up
Unigene0067208	0	0	0	0.3553	2.1713	0.5671	10.0102	0.00350874	0.0410719	up
Unigene0017535	0	0	0	1.1286	1.1756	0.7881	10.0095	0.00284758	0.0348747	up
Unigene0009382	0	0	0	0	2.3705	0.7169	10.0072	0.0037198	0.0430182	up
Unigene0029696	0	0	0	0.2243	2.0562	0.8056	10.0066	0.00334739	0.0395328	up
Unigene0054255	0	0	0	0.4348	1.9566	0.694	10.0063	0.00082511	0.0136286	up
Unigene0069906	0	0	0	0.4714	2.4224	0.1881	10.0046	0.00144266	0.0207428	up
Unigene0025068	0	0	0	0.0882	2.5715	0.4222	10.0046	0.00345946	0.0406159	up
Unigene0013771	0	0	0	0.1947	2.1095	0.777	10.0043	0.00218795	0.0285803	up
Unigene0061352	0	0	0	0.7265	1.8161	0.5352	10.0027	7.8e-05	0.00228018	up
Unigene0067570	0	0	0	0.1941	2.184	0.6972	10.0015	0.002324	0.029927	up
Unigene0039889	0	0	0	0.1055	2.5044	0.4629	10.0004	0.00045532	0.00860148	up
Unigene0037545	0	0	0	0.5771	1.8034	0.6909	9.99972	0.00426895	0.0479556	up
Unigene0062972	0	0	0	0	2.1814	0.8879	9.99873	0.00237403	0.0303971	up
Unigene0056040	0	0	0	0.742	1.9236	0.3948	9.99454	0.000700138	0.0119898	up
Unigene0065133	0	0	0	0.4348	2.174	0.4338	9.98613	0.00282234	0.0346423	up
Unigene0066032	0	0	0	0.2351	2.6777	0.1251	9.9839	0.00290298	0.0353722	up
Unigene0071297	0	0	0	0.8956	1.5754	0.5559	9.97866	0.00110704	0.0171059	up
Unigene0068711	0	0	0	0.0889	2.1486	0.7805	9.97441	0.0027207	0.0336828	up
Unigene0058308	0	0	0	0	1.7942	1.2194	9.97231	0.00269548	0.0334738	up
Unigene0049471	0	0	0	0.2259	1.8826	0.9015	9.97059	0.00345444	0.0405702	up
Unigene0021417	0	0	0	1.0581	1.7633	0.1876	9.97011	0.00433064	0.0484893	up
Unigene0059258	0	0	0	0.1809	1.9593	0.866	9.96876	0.00172069	0.0236966	up
Unigene0026524	0	0	0	0.3848	2.0038	0.6141	9.96708	0.00166226	0.023127	up
Unigene0025973	0	0	0	0.093	2.8657	0.0371	9.96376	0.00151773	0.0215879	up
Unigene0019502	0	0	0	0.4703	1.9593	0.5629	9.96217	0.00317263	0.0378423	up
Unigene0057693	0	0	0	1.07	1.6346	0.2846	9.96058	0.00112407	0.017265	up
Unigene0057080	0	0	0	0.1031	1.9752	0.9047	9.95759	0.00385968	0.0442749	up
Unigene0020169	0	0	0	0.6242	1.7089	0.6404	9.95298	0.000777084	0.0130193	up
Unigene0024054	0	0	0	0.3458	2.0745	0.5519	9.95235	0.000505778	0.00930022	up
Unigene0031764	0	0	0	1.2054	1.3392	0.4275	9.9523	0.00349379	0.0409452	up
Unigene0066740	0	0	0	0.3102	2.4124	0.2475	9.95133	0.00429113	0.0481607	up
Unigene0064140	0	0	0	0.3112	2.161	0.4967	9.95075	0.0028094	0.0345248	up
Unigene0071449	0	0	0	0.4087	1.3622	1.1959	9.94973	0.00402156	0.0457201	up
Unigene0058710	0	0	0	0.2801	1.7115	0.9685	9.94647	0.00142447	0.020543	up
Unigene0068456	0	0	0	0	2.3829	0.5705	9.9432	0.00402509	0.0457458	up
Unigene0021666	0	0	0	0.0865	0.6486	2.2087	9.9385	0.00292122	0.0355703	up
Unigene0036000	0	0	0	0.9069	1.6194	0.4136	9.93659	0.00383502	0.0440668	up
Unigene0065814	0	0	0	0.5141	1.4992	0.923	9.93482	0.00318274	0.0379188	up
Unigene0018880	0	0	0	0.7269	1.8172	0.3867	9.93212	0.00352997	0.0412817	up
Unigene0025110	0	0	0	0.5099	1.9121	0.5087	9.93207	0.00409838	0.0464757	up
Unigene0060286	0	0	0	0.553	1.8432	0.5296	9.92965	0.00251903	0.031804	up
Unigene0017551	0	0	0	0.4899	1.796	0.6255	9.92253	0.00148061	0.021153	up
Unigene0072092	0	0	0	1.335	0.8652	0.7102	9.92204	0.00420799	0.0474426	up
Unigene0055484	0	0	0	0.5218	2.1015	0.2776	9.91732	0.00168279	0.0233231	up
Unigene0070671	0	0	0	0.1415	2.3385	0.414	9.91389	8.99e-06	0.000463326	up
Unigene0056905	0	0	0	0.081	2.2267	0.5816	9.91154	0.00263129	0.0328714	up
Unigene0071636	0	0	0	0.7715	1.9287	0.1759	9.90494	0.00437411	0.0488313	up
Unigene0021494	0	0	0	0	1.7213	1.1539	9.90448	0.00290749	0.0354174	up
Unigene0060364	0	0	0	0.4828	1.9108	0.4816	9.90448	0.00423748	0.0476766	up
Unigene0019806	0	0	0	0.1819	1.8947	0.7984	9.90438	0.00207789	0.0274156	up
Unigene0026864	0	0	0	0.4458	1.7832	0.6404	9.90157	0.00119023	0.0179898	up
Unigene0060706	0	0	0	0.7456	1.9527	0.17	9.90102	0.00401983	0.0457149	up
Unigene0041157	0	0	0	0.0962	1.8435	0.9211	9.89724	0.00344374	0.0404644	up
Unigene0036620	0	0	0	0.0882	2.2776	0.4926	9.89603	0.00365036	0.042379	up
Unigene0059592	0	0	0	0.3956	2.2248	0.2367	9.89537	0.00366675	0.042528	up
Unigene0001885	0	0	0	0.3848	2.0038	0.4606	9.89138	0.0021503	0.0281653	up
Unigene0021187	0	0	0	0.3272	1.9997	0.5223	9.89138	0.00350917	0.0410719	up
Unigene0017628	0	0	0	0.6876	1.1459	1.0059	9.88641	0.00190565	0.0256389	up
Unigene0023995	0	0	0	0.3164	1.8454	0.6733	9.88422	0.00270985	0.0336006	up
Unigene0056023	0	0	0	0.1301	2.3848	0.3115	9.87979	0.00147249	0.0210748	up
Unigene0061694	0	0	0	0.9476	1.5002	0.3781	9.87953	0.00137505	0.0200478	up
Unigene0059690	0	0	0	0.4163	1.9079	0.4983	9.8778	0.00268822	0.0334016	up
Unigene0021580	0	0	0	0.1575	1.969	0.6914	9.87544	0.00157705	0.0222301	up
Unigene0062398	0	0	0	0.1721	2.1504	0.4805	9.86779	0.00251978	0.031804	up
Unigene0007016	0	0	0	0.3479	1.9566	0.4858	9.86124	0.00169617	0.0234506	up
Unigene0023156	0	0	0	0.6926	1.5389	0.5527	9.85808	0.002602	0.0326062	up
Unigene0025698	0	0	0	0.3768	1.8052	0.6013	9.85762	0.00175266	0.0240366	up
Unigene0052692	0	0	0	0.708	1.4749	0.565	9.83915	0.00280236	0.0344871	up
Unigene0030557	0	0	0	0.2822	2.2336	0.2252	9.83552	0.00163191	0.0228064	up
Unigene0053754	0	0	0	0.3042	2.1126	0.3237	9.83526	0.00418448	0.047273	up
Unigene0034769	0	0	0	0.5922	1.4804	0.6616	9.83194	0.00280768	0.0345214	up
Unigene0032381	0	0	0	0.9672	1.6852	0.0702	9.82581	0.00365536	0.0424233	up
Unigene0022828	0	0	0	0.553	1.1981	0.9709	9.82549	0.00211048	0.0277449	up
Unigene0025108	0	0	0	0.6104	1.526	0.5683	9.81629	0.00198709	0.0264424	up
Unigene0022585	0	0	0	0.5545	1.0395	1.1062	9.81389	0.00431263	0.0483403	up
Unigene0014893	0	0	0	0.2015	1.9313	0.5629	9.81148	0.00381093	0.0438742	up
Unigene0055462	0	0	0	0.1966	1.3102	1.1764	9.80478	0.00278481	0.0343226	up
Unigene0057983	0	0	0	0.1693	1.9044	0.608	9.80397	0.00232439	0.029927	up
Unigene0070882	0	0	0	0.2995	1.5804	0.7966	9.80117	0.0023796	0.0304576	up
Unigene0007364	0	0	0	0.5793	1.3515	0.7396	9.79788	0.00258393	0.0324426	up
Unigene0058926	0	0	0	0.7382	1.5378	0.3927	9.79696	0.00449091	0.0498214	up
Unigene0015002	0	0	0	0.4556	1.8351	0.3636	9.78915	0.00115771	0.0176196	up
Unigene0037767	0	0	0	0	2.6432	0	9.78311	0.00250635	0.0316901	up
Unigene0022071	0	0	0	0.9201	1.4375	0.2753	9.77747	0.00449124	0.0498214	up
Unigene0070164	0	0	0	0.2795	2.096	0.223	9.7585	0.000173281	0.00408888	up
Unigene0031439	0	0	0	0.4685	1.6592	0.4674	9.75661	0.00442956	0.0493123	up
Unigene0054028	0	0	0	0.1764	2.0572	0.3518	9.75121	0.00402151	0.0457201	up
Unigene0008119	0	0	0	0	2.0935	0.4627	9.73482	0.00213993	0.02805	up
Unigene0055162	0	0	0	0.2346	1.6938	0.6239	9.73262	0.00153714	0.0217615	up
Unigene0047540	0	0	0	0.46	1.6292	0.4589	9.73024	0.00443064	0.0493167	up
Unigene0046004	0	0.0208	0	0.7969	13.4279	3.427	9.72902	5.87e-11	1.4e-07	up
Unigene0027341	0	0	0	0.0645	1.9354	0.5149	9.71127	0.0019786	0.0263636	up
Unigene0024655	0	0	0	0.9976	1.3603	0.1448	9.70431	0.00342026	0.0402082	up
Unigene0051606	0	0	0	0.7936	0.9092	0.7916	9.69951	0.00154133	0.0218058	up
Unigene0008153	0	0	0	0.4177	1.4791	0.5833	9.69122	0.00338029	0.0398689	up
Unigene0054725	0	0	0	0.0874	1.6759	0.6978	9.68013	0.00435028	0.0486207	up
Unigene0015762	0	0	0	0.8192	1.2798	0.3269	9.65934	0.00334255	0.0394919	up
Unigene0006791	0	0	0	0.4487	1.215	0.7161	9.63166	0.00361956	0.0421441	up
Unigene0033278	0	0	0	0.4139	1.3	0.6098	9.59725	1.2e-05	0.00057903	up
Unigene0018280	0	0	0	0.3976	1.6014	0.3173	9.59264	0.0011576	0.0176196	up
Unigene0018166	0	0	0	0.4458	1.6346	0.2135	9.57862	0.00440559	0.0491064	up
Unigene0057968	0	0	0	0.2082	1.8212	0.2492	9.56897	0.000873606	0.0142469	up
Unigene0043124	0	0	0	0.2778	1.3891	0.6097	9.5677	0.00115634	0.0176138	up
Unigene0024843	0	0	0	0.1607	1.741	0.3206	9.53288	0.00427718	0.0480405	up
Unigene0003976	0	0	0	0.5652	1.0203	0.6013	9.50964	0.00231949	0.0298907	up
Unigene0016636	0	0	0	0.286	1.5489	0.3423	9.5033	0.00200311	0.0266111	up
Unigene0004868	0	0	0	0.1406	1.8454	0.1683	9.48804	0.000383779	0.00755614	up
Unigene0019807	0	0	0	0	1.9125	0.2338	9.48267	0.00440427	0.0490993	up
Unigene0019760	0	0	0	0.184	0.9967	0.9545	9.47519	0.00418318	0.0472657	up
Unigene0022597	0	0	0	0	1.7488	0.2791	9.40081	0.00351301	0.0411034	up
Unigene0042838	0	0	0	0.0703	1.2595	0.6452	9.36267	0.000295307	0.00616052	up
Unigene0038070	0	0	0	0	1.9734	0	9.36151	0.00328001	0.0388735	up
Unigene0036066	0.3776	0	0	7.8018	185.647	42.9634	9.29023	1.05e-10	1.98e-07	up
Unigene0064457	0	0	0	0.0609	1.3707	0.4376	9.28324	0.00365993	0.0424627	up
Unigene0038751	0	0	0.3156	8.6845	158.326	29.2744	9.28064	2.61e-11	7.48e-08	up
Unigene0004514	0	0	0	0.7954	0.5423	0.5193	9.2738	0.00163502	0.0228277	up
Unigene0039888	0	0	0	0.4092	1.3639	0.0467	9.2446	0.00434423	0.0485959	up
Unigene0027687	0	0	0	1.5193	0.1809	0.0866	9.2182	0.00399746	0.045547	up
Unigene0041209	0.0846	0	0	3.2424	35.8227	11.1803	9.21412	4.59e-13	3.66e-09	up
Unigene0047293	0.0937	0	0.0934	1.9064	90.876	14.9653	9.16963	2.96e-10	4.33e-07	up
Unigene0029838	0	0	0	0.2886	1.0099	0.4145	9.15735	0.00136025	0.0198805	up
Unigene0030000	0	0	0	0.4239	1.0598	0.2114	9.14219	0.00134883	0.0197699	up
Unigene0028701	0	0	0.115	2.8362	48.9008	9.2272	9.05018	6.68e-11	1.5e-07	up
Unigene0014233	0	0	0	0.0434	0	1.4891	8.99671	0.00245789	0.0312481	up
Unigene0027869	0	0.025	0	0.5574	9.0673	2.2874	8.89628	5.82e-09	3.29e-06	up
Unigene0005318	0	0.0814	0	2.2488	29.7653	6.7642	8.89601	3.59e-09	2.34e-06	up
Unigene0024598	0	0.069	0	0.5865	22.9682	8.161	8.84439	3.35e-09	2.29e-06	up
Unigene0035670	0	0.0715	0	0.5322	21.2868	10.3752	8.81464	3.5e-09	2.33e-06	up
Unigene0012968	0	0	0	0	1.3052	0.0368	8.80521	0.00395987	0.0451618	up
Unigene0057840	0	0.0304	0	0.888	9.4849	3.0794	8.78957	1.71e-11	5.99e-08	up
Unigene0020227	0	0	0.3924	8.378	131.785	24.217	8.71049	1.66e-10	2.79e-07	up
Unigene0033569	0	0.1446	0	0.1537	39.451	19.5045	8.67517	4.46e-07	5.89e-05	up
Unigene0029649	0.0174	0	0	0.1651	5.6394	1.0407	8.61986	1.27e-07	2.69e-05	up
Unigene0031187	0.1305	0	0.0651	0	48.5776	26.7605	8.58933	2.01e-06	0.000161045	up
Unigene0045908	0	0.0408	0	0.7372	9.8826	4.7237	8.55484	1.57e-10	2.74e-07	up
Unigene0049847	0	0.0513	0	0.341	12.526	6.1069	8.53084	2.12e-09	1.75e-06	up
Unigene0041171	0	0.0726	0.0813	2.1985	40.8482	13.5428	8.5224	7.99e-12	3.37e-08	up
Unigene0004798	0	0.0802	0	1.0226	17.6452	10.5745	8.51024	6.64e-10	7.93e-07	up
Unigene0010729	0	0.0364	0	0.8516	10.451	1.8535	8.49758	4.12e-08	1.28e-05	up
Unigene0035194	0	0	0.5499	7.7401	162.831	25.4007	8.47726	3.37e-09	2.29e-06	up
Unigene0045945	0	0	0.0345	0.3759	8.2129	3.574	8.46166	1.11e-09	1.11e-06	up
Unigene0047582	0.2257	0.2009	0.5403	5.3831	264.43	60.1064	8.41453	2.92e-11	8.07e-08	up
Unigene0000937	0	0	0.309	0	62.8571	38.7867	8.3617	1.86e-05	0.00080677	up
Unigene0036982	0	0.0282	0	0.5837	6.6219	2.0303	8.35541	4.48e-10	5.85e-07	up
Unigene0061696	0	0.2986	0	0	96.4546	0	8.33549	0.00157252	0.0221749	up
Unigene0008534	0.2126	0.2839	1.0604	18.6636	333.916	142.393	8.31253	3.18e-13	2.86e-09	up
Unigene0041621	0	0.0293	0	0.1245	7.2349	1.8874	8.30191	1.51e-06	0.000131604	up
Unigene0037245	0	0.0226	0	0.2042	5.3541	1.5047	8.28781	1.74e-08	7.27e-06	up
Unigene0034329	0	0.0886	0	0	18.5229	8.5315	8.25434	1.29e-05	0.000612657	up
Unigene0045465	0.1846	0	0.3069	2.388	99.7338	47.1534	8.24657	1.12e-09	1.11e-06	up
Unigene0047400	0.0676	0	0.0674	0.384	35.6489	4.7752	8.23975	8.01e-08	1.98e-05	up
Unigene0022754	0	0.1061	0.1188	1.5787	60.417	5.6692	8.23298	1.21e-08	5.56e-06	up
Unigene0048758	0	0.0429	0.0962	2.2136	32.0786	7.1204	8.2178	2.38e-11	7.12e-08	up
Unigene0001260	0	0	0.1951	0.9255	36.0893	20.1616	8.19506	3.01e-08	1.07e-05	up
Unigene0050079	0.1011	0.0277	0.0775	1.6114	45.2361	13.5993	8.19478	2.27e-12	1.16e-08	up
Unigene0002114	0.0506	0	0	0.0239	13.0056	1.7193	8.18724	7.38e-06	0.000398409	up
Unigene0048770	0	0.0449	0	0.4538	8.7271	3.8311	8.17891	7.05e-10	7.93e-07	up
Unigene0030268	0.2263	0.1007	0	1.4988	74.8452	17.514	8.16505	5.63e-09	3.23e-06	up
Unigene0003418	0	0.0566	0	0.9619	12.173	2.9745	8.15288	1.42e-07	2.91e-05	up
Unigene0048216	0.2156	0.4222	0.215	9.5271	172.996	54.2929	8.11735	3.43e-14	6.16e-10	up
Unigene0010364	0	0.0902	0	0.959	15.1429	8.9157	8.1156	4.29e-09	2.7e-06	up
Unigene0022555	0	0.0258	0	0.7414	5.3312	1.0299	8.10481	6.83e-08	1.78e-05	up
Unigene0041375	0	0	0.3358	3.2261	66.2413	22.6297	8.09941	5.1e-09	3e-06	up
Unigene0003968	0	0.4113	0.0922	4.11	107.913	25.4708	8.09316	9.89e-10	1.01e-06	up
Unigene0032066	0	0	0.1784	2.1162	36.5364	8.9166	8.05877	8.6e-09	4.44e-06	up
Unigene0011387	0.2668	0.1187	0.0665	2.7767	97.3342	19.5902	8.0489	4.82e-10	6.11e-07	up
Unigene0035870	0.0653	0	0	0.7102	12.1187	4.3862	8.04238	4.95e-09	2.94e-06	up
Unigene0057921	0.028	0	0	0	7.1254	0	7.9914	0.00185398	0.0250895	up
Unigene0007833	0.0751	0.1003	0.2997	1.6352	98.9582	18.0978	7.96477	1.97e-09	1.65e-06	up
Unigene0015871	0.1539	0	0	0	21.9002	16.2097	7.95203	1.52e-05	0.0006917	up
Unigene0029344	0.034	0	0	0.2573	6.2976	1.835	7.94698	3.38e-08	1.17e-05	up
Unigene0022572	0	0.9817	0	11.1319	151.671	79.3251	7.94627	3.74e-09	2.42e-06	up
Unigene0034226	0	0.0262	0	0.584	3.6842	2.0971	7.92452	2.92e-10	4.33e-07	up
Unigene0048759	0	0	0.1486	0.7519	29.7588	4.9688	7.89941	1.5e-07	3.04e-05	up
Unigene0036444	0	0.1636	0	2.8699	27.3559	8.8139	7.89863	1.79e-10	2.92e-07	up
Unigene0037140	0.0978	0.0871	0	2.2674	31.4625	10.0808	7.88839	7.42e-11	1.61e-07	up
Unigene0047399	0	0.0543	0	0.808	9.9548	1.8423	7.85884	8.28e-07	8.73e-05	up
Unigene0023622	0	0.2428	0	2.9679	45.1587	8.1348	7.85623	5.93e-08	1.62e-05	up
Unigene0008964	0	0.0788	0.1765	2.0939	36.1159	20.2517	7.83915	9.66e-11	1.88e-07	up
Unigene0046031	0	0.1543	0	2.5017	21.0849	11.4711	7.82785	9.7e-11	1.88e-07	up
Unigene0039089	0.0497	0.0221	0.1239	1.4814	31.0739	11.8963	7.82745	3.45e-11	9.17e-08	up
Unigene0040910	0	0	0.0391	0.0742	7.2305	1.5092	7.81647	1.1e-05	0.000539932	up
Unigene0007907	0.1557	0	0	0.8838	23.9339	9.58	7.7874	7.29e-08	1.86e-05	up
Unigene0012925	0	0.0656	0	0.4186	11.1032	2.9507	7.7854	1.95e-07	3.59e-05	up
Unigene0012877	0	0	0.0531	1.1598	7.4791	3.0381	7.78074	4.34e-10	5.77e-07	up
Unigene0066880	0	0.0393	0	0.3346	7.1962	1.0847	7.77626	2.8e-07	4.31e-05	up
Unigene0004135	0.258	0	0	0.9767	50.7638	3.7023	7.74749	2.83e-06	0.000201288	up
Unigene0026307	0	0	0.306	1.742	52.9002	8.8042	7.69586	1.48e-07	3e-05	up
Unigene0029068	0	0.1048	0	0.2228	14.0603	7.4216	7.69422	1.21e-06	0.000113402	up
Unigene0005192	0	0.0248	0	0.1055	4.0202	0.9468	7.67621	8.62e-06	0.000447522	up
Unigene0047999	0.0547	0.3897	0.6003	5.1783	154.386	53.3073	7.67075	3.12e-10	4.4e-07	up
Unigene0016443	0	0.0504	0	0.4282	8.1625	1.4524	7.63857	4.66e-06	0.00028669	up
Unigene0060927	0.0533	0	0	0	10.6094	0	7.63699	0.00226066	0.0292797	up
Unigene0069384	0	0.2156	0	0.3438	35.4259	7.133	7.63657	5.42e-06	0.000320848	up
Unigene0048318	0	0.5784	0.162	3.0744	114.862	28.9807	7.63249	3.17e-08	1.12e-05	up
Unigene0042644	0	0.0764	0	0.6901	11.6184	2.721	7.62001	1.96e-08	7.94e-06	up
Unigene0000689	0	0	0.3098	0.147	37.8383	22.1649	7.60109	5.93e-06	0.000343845	up
Unigene0047743	0	0.0233	0.0521	0.5938	10.6481	3.2182	7.5833	8.07e-10	8.78e-07	up
Unigene0030604	0	0.0616	0	0.3272	9.4348	1.9847	7.57511	9.24e-06	0.000473403	up
Unigene0045499	1.3531	2.8606	3.2048	57.6713	1039.33	316.407	7.57384	2.65e-13	2.86e-09	up
Unigene0006704	0	0.0356	0	0.1515	5.7603	0.8615	7.57184	2.03e-06	0.000161776	up
Unigene0038614	0	0.0864	0.6778	3.721	106.489	34.606	7.56606	3.38e-08	1.17e-05	up
Unigene0042134	0.0118	0.0844	0.0945	0.6053	23.891	11.4581	7.55872	7.97e-10	8.78e-07	up
Unigene0002551	0	0.0549	0	0.4085	7.2932	2.5843	7.54966	1.59e-07	3.13e-05	up
Unigene0048668	0	0	0.0738	1.8199	11.4899	0.5027	7.54814	4.44e-07	5.89e-05	up
Unigene0030027	0	0.0664	0	0.9876	9.2281	2.0265	7.52646	5.85e-08	1.61e-05	up
Unigene0048511	0	0	0.2003	2.471	24.6287	9.4803	7.51275	1.43e-08	6.22e-06	up
Unigene0037809	0.4268	0	0.1703	1.1308	91.3302	16.1785	7.50736	2.5e-07	4.11e-05	up
Unigene0046471	0.1953	0.4346	0.2922	6.515	124.088	36.3192	7.50004	3.88e-12	1.86e-08	up
Unigene0042399	0	0	0.1711	0.6495	23.203	6.9969	7.49426	6.51e-07	7.53e-05	up
Unigene0038110	0	0.051	0.0571	0.7584	12.5029	6.0735	7.48269	1.29e-09	1.22e-06	up
Unigene0043627	0.1546	0.0688	0.6937	2.9988	128.746	31.7808	7.47822	8.99e-09	4.55e-06	up
Unigene0016191	0.0723	0	0	0.9578	10.4318	1.4194	7.46895	2.83e-06	0.000201288	up
Unigene0036208	2.9169	0	0.3117	12.717	497.459	57.192	7.45723	1.3e-06	0.000119375	up
Unigene0046717	0.4295	1.1088	1.7134	20.8506	468.854	76.7723	7.44468	6.12e-11	1.42e-07	up
Unigene0041484	0	0.1926	0	3.0719	23.0372	7.0274	7.42667	2.96e-08	1.06e-05	up
Unigene0048197	0.2551	0.1135	0	1.9311	41.6362	19.0707	7.40884	2.06e-08	8.17e-06	up
Unigene0000504	0	0.0665	0.298	2.4744	45.0358	14.2171	7.40385	2.62e-09	1.96e-06	up
Unigene0033211	0	0	0.0735	0.6628	9.1267	2.6445	7.40233	1e-07	2.27e-05	up
Unigene0036998	0.5774	0.257	0.1152	5.928	113.813	39.0215	7.38533	1.84e-11	5.99e-08	up
Unigene0005821	0	0.0322	0	0.3421	3.6483	1.3648	7.37774	2.52e-06	0.000184773	up
Unigene0040201	0	0.1382	0.0774	1.69	25.5929	8.3265	7.36776	6.84e-10	7.93e-07	up
Unigene0037285	0	0.0442	0	0.5643	5.7211	1.0133	7.36745	5.27e-06	0.000314376	up
Unigene0011522	0.2087	0.0929	0	1.9747	38.1325	9.6913	7.36732	4.83e-09	2.93e-06	up
Unigene0032886	0	0.0631	0	1.0738	7.8847	1.446	7.36535	3.04e-06	0.00021154	up
Unigene0048210	0.4443	0.6592	0	7.4979	141.68	32.3771	7.36218	8.78e-09	4.5e-06	up
Unigene0024795	0	0.0376	0	0.6788	4.791	0.701	7.35858	4.09e-06	0.000261585	up
Unigene0057920	0	0.0524	0	0.4455	6.3573	1.6665	7.33653	3.43e-07	4.88e-05	up
Unigene0019046	0	0.1423	0	0.479	16.597	5.8348	7.33095	2.73e-07	4.27e-05	up
Unigene0008339	0	0.0567	0	0.3313	6.2737	2.5235	7.33089	4.69e-07	6.11e-05	up
Unigene0029907	0	0	0.389	4.6138	45.5956	12.3711	7.3298	1.17e-08	5.44e-06	up
Unigene0001701	0.1026	0	0	0.0971	8.0887	8.2888	7.32707	3.12e-05	0.00116522	up
Unigene0038003	0	0.0668	0	0.8522	7.9291	1.9268	7.32464	3.83e-06	0.000251058	up
Unigene0001364	0	0.0455	0	0.6291	5.282	1.2357	7.29529	3.86e-06	0.000252533	up
Unigene0012766	0	0.0482	0	0.0512	6.6392	0.8178	7.28329	3.13e-05	0.00116829	up
Unigene0045133	0.0928	0.2478	0.8329	3.6441	131.848	46.7034	7.27853	3.24e-09	2.26e-06	up
Unigene0045943	0	0.047	0	0.1	5.6232	1.5558	7.27494	4.77e-05	0.00158279	up
Unigene0032004	0	0.1657	0	0.6164	18.2693	6.7456	7.27319	3.14e-07	4.64e-05	up
Unigene0013161	0	0.0363	0	0.3862	4.0222	1.171	7.264	5.12e-06	0.000308646	up
Unigene0007564	0	0	0.054	0.2564	5.7686	2.2508	7.2598	7.6e-06	0.000406144	up
Unigene0040270	0	0	0.0862	0.3682	8.5213	4.2763	7.25489	5.32e-07	6.61e-05	up
Unigene0037567	0	0.1724	0	1.2826	19.9998	5.0443	7.25462	8.46e-08	2.02e-05	up
Unigene0004102	0.1096	0	0.1093	0.8299	27.4441	5.1325	7.25371	1.94e-07	3.57e-05	up
Unigene0049571	0.4399	0.5385	0.0731	2.3244	101.565	55.5073	7.24403	2.35e-09	1.83e-06	up
Unigene0005680	0	0	0.088	0.7518	9.3271	3.2331	7.24101	1.41e-07	2.91e-05	up
Unigene0067974	0	0	0.15	0.1423	14.2332	8.2355	7.23592	7.33e-06	0.00039702	up
Unigene0045498	0.1137	0	0	0	16.5873	0.5152	7.23283	0.000441006	0.00839958	up
Unigene0047112	0	0.0811	0	0.7543	8.9963	2.4076	7.22801	3.64e-08	1.22e-05	up
Unigene0015462	0	0.1884	0	2.203	20.359	5.4338	7.21527	2.11e-07	3.73e-05	up
Unigene0010052	0	0	0.4754	0.1128	43.1282	27.401	7.21524	2.6e-05	0.00102331	up
Unigene0009897	0.0097	0.1299	0.0291	3.1536	17.8878	3.9825	7.2127	1.67e-11	5.99e-08	up
Unigene0001221	0	0	0.1111	1.4764	12.0827	2.7772	7.20008	9.89e-08	2.27e-05	up
Unigene0005055	0	0.0594	0	0.6311	6.8886	1.2086	7.19909	1.23e-05	0.000590648	up
Unigene0061614	0.3643	0.054	0	1.3789	47.1314	12.3791	7.18551	1.73e-07	3.31e-05	up
Unigene0055804	0	0.0789	0	0	10.4473	1.0373	7.18546	0.000262153	0.0056174	up
Unigene0039052	0	0	0.1977	0.844	21.2538	6.6602	7.18451	3.99e-07	5.48e-05	up
Unigene0019328	0	0.0585	0	2.054	5.1863	1.2417	7.17982	1.24e-06	0.000115715	up
Unigene0062896	0	0.075	0	0.7178	9.0714	1.0183	7.17093	2.07e-06	0.0001636	up
Unigene0039702	0.1009	0	0	0.5251	10.6596	3.3521	7.17064	7.09e-07	7.92e-05	up
Unigene0044296	0	0.124	0.6253	3.7248	76.6036	26.6728	7.15787	3.45e-08	1.19e-05	up
Unigene0001459	0.1991	0	0	0	20.642	7.7422	7.15545	9e-05	0.00253351	up
Unigene0045439	0.0554	0.0986	0	0.5242	17.0801	4.2672	7.14998	5.62e-08	1.57e-05	up
Unigene0006526	0	0	0.553	2.9732	60.6239	14.9336	7.14983	2.25e-07	3.88e-05	up
Unigene0070613	0	0.0418	0	0.578	4.6677	0.6741	7.1459	1.27e-05	0.000602164	up
Unigene0043107	0.0655	0.0466	0.1306	1.4874	26.5327	6.2809	7.14293	5.57e-11	1.38e-07	up
Unigene0017693	0	0	0.0422	0.4409	4.2414	1.2794	7.14234	3.68e-06	0.000244135	up
Unigene0029450	0	0	0.0483	0.4581	5.1526	1.2063	7.14097	6.06e-06	0.000349358	up
Unigene0044050	0.0178	0.0635	0	1.6374	7.7641	2.0408	7.13691	1.44e-11	5.75e-08	up
Unigene0056005	0	0.0591	0	0.6286	6.7042	0.9531	7.13136	1.98e-05	0.00083882	up
Unigene0008657	0.6021	0.2297	0.1716	2.8894	107.801	28.4814	7.11583	1.7e-09	1.46e-06	up
Unigene0004674	1.6174	3.2186	2.4428	36.9161	717.058	244.511	7.0999	1.43e-12	9.34e-09	up
Unigene0001226	0.6869	0.6115	0.6851	12.0256	227.85	31.9018	7.09823	2.19e-10	3.5e-07	up
Unigene0061210	0.1245	0	0	3.4747	10.5997	2.9608	7.09623	9.41e-09	4.61e-06	up
Unigene0032535	0	0	0.2402	0.3419	27.5898	4.8662	7.09322	9.61e-06	0.000486053	up
Unigene0009006	0	0.0542	0	0.8065	5.3764	1.1953	7.08883	7.42e-06	0.000399885	up
Unigene0037130	0	0.0774	0	1.8914	6.7838	1.8211	7.08333	1.36e-09	1.27e-06	up
Unigene0070845	0	0.047	0	0.5989	4.1172	1.633	7.07775	4.81e-06	0.000294398	up
Unigene0012303	0	0.0453	0	0.1606	4.0559	1.8845	7.07339	8.07e-07	8.56e-05	up
Unigene0001793	0	0.1031	0	1.6073	10.1661	2.0405	7.06593	5.58e-08	1.57e-05	up
Unigene0005405	0	0.0692	0	0.4414	7.3864	1.4089	7.06046	2.49e-06	0.00018289	up
Unigene0019671	0	0.0456	0	0.9693	3.7555	1.3149	7.0493	2.38e-06	0.00017717	up
Unigene0027534	0.1617	0.7915	0	4.054	75.2712	45.9625	7.03825	1.18e-08	5.45e-06	up
Unigene0048282	0	0	0.149	0.2828	19.0276	0.2257	7.03469	0.000180889	0.00422674	up
Unigene0028795	0.144	0	0	2.1117	12.7142	3.9682	7.02807	6.61e-08	1.74e-05	up
Unigene0041678	0.0687	0	0	0.5523	7.5533	0.8297	7.02306	2.5e-06	0.000183527	up
Unigene0041848	0	0.0795	0	0.6763	7.6779	1.9563	7.01894	9.59e-07	9.7e-05	up
Unigene0035635	0	0.0814	0	0.346	7.5675	2.6229	7.01614	3.63e-05	0.00130303	up
Unigene0042322	0	0.3472	0.0778	3.1374	45.8878	5.9499	7.01517	4.05e-08	1.27e-05	up
Unigene0004988	0	0.0716	0	1.5605	5.9307	1.7616	7.01379	5.86e-08	1.61e-05	up
Unigene0027975	0	0.0811	0	1.8977	7.1156	1.4455	7.0108	5.66e-06	0.000331363	up
Unigene0023689	0	0.0504	0	1.0724	4.5573	0.8558	7.00765	7.33e-06	0.00039702	up
Unigene0042568	1.5974	3.0732	9.1472	75.0915	1262.41	419.075	6.9901	7.78e-11	1.64e-07	up
Unigene0019397	0	0.1389	0	0.1476	12.3024	5.1841	6.98818	2.11e-05	0.000882951	up
Unigene0021587	0	0	0.0655	0.1242	6.7031	1.4872	6.98799	1.11e-05	0.000542753	up
Unigene0017277	0	0	0.6988	5.3872	66.3669	16.8655	6.9866	1.09e-07	2.4e-05	up
Unigene0034824	0	0	0.1064	1.7663	9.924	1.772	6.98328	2.14e-07	3.79e-05	up
Unigene0002905	0.0619	0.0551	0.1236	1.2017	24.252	4.9353	6.98077	3.07e-09	2.2e-06	up
Unigene0006888	0.1331	0.237	0.7965	4.2828	112.833	27.8443	6.9572	1.22e-08	5.59e-06	up
Unigene0046710	0.1298	0	0	3.6839	10.181	2.2538	6.9563	3.78e-08	1.24e-05	up
Unigene0032035	0	0.1033	0	2.6361	8.6031	1.5777	6.95506	1.87e-07	3.47e-05	up
Unigene0070638	0	0.2148	0.1203	1.1418	32.0636	7.8819	6.93796	9.95e-08	2.27e-05	up
Unigene0002581	0	0.0926	0	0.4429	6.2742	4.6342	6.93763	1.48e-06	0.000129803	up
Unigene0006323	0	0.0607	0	0.5807	5.8061	1.0297	6.9329	3.18e-05	0.00118131	up
Unigene0006955	0	0.0535	0	0.5684	4.7359	1.2246	6.93116	7.42e-07	8.12e-05	up
Unigene0029762	0.0493	0	0	1.027	4.7066	0.2608	6.92588	3.06e-05	0.00114946	up
Unigene0022941	0	0.0509	0	1.6764	4.4159	0.0863	6.92347	0.0001252	0.00323592	up
Unigene0030219	0	0.0782	0	0.4155	5.4008	3.6472	6.91906	1.29e-06	0.000119015	up
Unigene0035869	0	0.2367	0	1.2161	23.9693	3.4467	6.91843	1.14e-06	0.000109281	up
Unigene0072020	0.1145	0	0	0.975	11.555	1.2968	6.91598	2.93e-06	0.000207015	up
Unigene0043245	0.029	0.4522	0.2461	3.5163	57.3638	26.6685	6.91139	8.82e-10	9.31e-07	up
Unigene0060109	0	0.1033	0	1.5377	8.3286	2.5419	6.90831	9.33e-06	0.00047664	up
Unigene0029396	0	0.0757	0	0.4023	6.7718	1.9103	6.90695	4.66e-07	6.09e-05	up
Unigene0032341	0	0.0881	0	1.9196	6.9441	1.6066	6.89295	1.94e-07	3.57e-05	up
Unigene0011865	0.5519	1.0877	0	5.1103	128.925	59.6818	6.88446	1.35e-07	2.84e-05	up
Unigene0067138	0	0.0684	0	0.8727	6.1505	1.0446	6.88204	1.32e-06	0.000120296	up
Unigene0013600	0	0.0735	0	0.6255	6.4171	1.6222	6.88128	1.54e-06	0.000132893	up
Unigene0061555	0	0.0479	0	0.6104	3.8997	1.0961	6.87085	1.5e-05	0.000685208	up
Unigene0037781	0	0.053	0	0.8457	4.1343	1.1698	6.8584	1.1e-05	0.000539116	up
Unigene0050065	0	0.0205	0	0	2.3386	0.0347	6.85513	0.00306726	0.0369228	up
Unigene0026617	0.1058	0	0	1.4019	8.6776	2.1576	6.85378	2.71e-07	4.27e-05	up
Unigene0043825	0.2995	0.0889	0.0498	1.2282	42.1942	7.1998	6.85204	8.57e-08	2.04e-05	up
Unigene0008235	0.282	0.2667	0.4687	3.4578	91.9221	21.7645	6.84726	8.67e-11	1.78e-07	up
Unigene0013130	0	0.0517	0	0.7963	3.9584	1.1833	6.84367	3.08e-07	4.6e-05	up
Unigene0039242	0	0	0.113	1.8767	11.0804	0	6.84128	0.000283995	0.00596091	up
Unigene0017662	0	0.0772	0	0.9433	6.1512	1.7018	6.83215	6.71e-07	7.67e-05	up
Unigene0011840	0	0.0639	0	1.8353	4.9842	0.4339	6.8267	1.81e-06	0.000149586	up
Unigene0037616	0	0	0.1567	0.0743	15.2382	2.4323	6.82325	6.73e-05	0.00206138	up
Unigene0044905	0	0.1502	0	1.1579	12.4432	3.3775	6.82069	2.25e-07	3.88e-05	up
Unigene0030045	0	0.0661	0	0.1406	5.8876	1.4307	6.81817	2.17e-05	0.000901237	up
Unigene0065310	0	0.0494	0	0.9444	3.3227	1.298	6.81575	6.37e-06	0.000360969	up
Unigene0001693	0	0.0441	0	0.9378	2.8521	1.1599	6.81045	5.43e-06	0.00032119	up
Unigene0039482	0.0472	0.042	0	0.2234	7.9481	1.8361	6.80984	7.88e-07	8.4e-05	up
Unigene0063828	0	0.0739	0	0.4714	6.9399	0.8151	6.79854	0.000117438	0.00309455	up
Unigene0045731	0.9584	0.5214	0.3717	6.2479	174.864	23.8838	6.79076	3.1e-09	2.21e-06	up
Unigene0004757	0.3259	0.0484	0.1084	1.388	41.2279	10.7478	6.78859	1.25e-08	5.64e-06	up
Unigene0003567	0.1406	0	0	2.7285	9.8148	2.9739	6.78613	8.28e-08	2.01e-05	up
Unigene0011619	0	0.0956	0	0.5591	7.0096	2.9611	6.78325	2.66e-07	4.25e-05	up
Unigene0003236	0	0.1551	0	0.5771	14.2556	2.2042	6.77932	4.03e-06	0.000259476	up
Unigene0023428	0	0.0654	0	1.495	5.0409	0.6381	6.77734	1.28e-06	0.000118586	up
Unigene0062677	0	0	0.0743	6.2076	1.9397	0	6.77682	0.000582118	0.0103489	up
Unigene0026600	0	0	0.0634	0.3911	5.0644	1.4887	6.77518	1.75e-06	0.000146747	up
Unigene0050831	0.218	0.3603	0.0621	1.5616	61.1494	6.9363	6.76495	4.1e-08	1.28e-05	up
Unigene0040787	0.0629	0	0	1.3102	4.8632	0.6654	6.76454	1.48e-05	0.000677244	up
Unigene0053580	0.067	0	0	0.3802	6.4937	0.4045	6.76332	0.000154219	0.00375379	up
Unigene0033742	0	0.0722	0	0.3838	4.7015	2.6955	6.75178	2.48e-06	0.000182451	up
Unigene0065702	0	0.7343	0	3.5126	62.5479	12.8733	6.74813	1.06e-06	0.000103692	up
Unigene0041893	0.1514	0.1348	0	0.5732	25.853	4.2314	6.74308	2.42e-06	0.00017884	up
Unigene0041220	0.0653	0.0291	0	0.3709	6.3357	3.3791	6.73931	3.09e-07	4.62e-05	up
Unigene0018847	0.0501	0	0	0.949	2.8862	1.5146	6.73853	2.82e-06	0.000200979	up
Unigene0035467	0	0.1219	0.0683	1.7491	14.2507	4.2133	6.73163	3.22e-09	2.26e-06	up
Unigene0051541	0	0.1123	0	2.2674	8.5515	1.0475	6.72338	4.02e-05	0.00139455	up
Unigene0026747	0	0.0481	0	0.4089	4.1741	0.4895	6.72052	0.000105217	0.00285864	up
Unigene0039047	0	0.0816	0	0.4337	6.4318	1.6265	6.70139	6.88e-06	0.000380149	up
Unigene0054777	0	0.0372	0	0.4354	2.7374	0.6949	6.70003	3.32e-05	0.00121922	up
Unigene0001026	0	0.047	0	0.5499	3.4573	0.8776	6.69949	3.32e-05	0.00121922	up
Unigene0066512	0	0	0.0655	0.1244	5.803	0.8684	6.697	3.49e-05	0.00126449	up
Unigene0039750	0.0248	0.0442	0	0.7289	5.1529	1.2759	6.69676	8.62e-08	2.04e-05	up
Unigene0031059	0.0731	0	0	0.2766	5.5897	1.7108	6.69563	6.4e-05	0.00198872	up
Unigene0010597	0.1103	0.1963	0.1466	1.7394	37.6533	7.5508	6.69463	5.54e-10	6.74e-07	up
Unigene0068835	0.3414	1.0637	0.7661	14.5389	134.404	75.4782	6.69157	1.71e-12	1.02e-08	up
Unigene0038044	0.2157	0.192	0.1076	1.1228	39.3349	12.5842	6.68558	1.86e-08	7.62e-06	up
Unigene0037137	0	0.1689	0	1.4368	12.7574	3.1171	6.6794	3.31e-07	4.79e-05	up
Unigene0030693	0.1568	0.1116	0	1.068	20.2454	6.1316	6.67601	3.62e-08	1.22e-05	up
Unigene0058192	0	0.0461	0	0.2939	3.7553	0.6646	6.67598	0.000109933	0.0029381	up
Unigene0043593	0	0.0653	0	0.903	4.6881	1.0809	6.67489	1.28e-06	0.000118385	up
Unigene0043656	0	0	0.8275	3.5893	62.9942	17.902	6.6738	2.7e-06	0.000194915	up
Unigene0028597	0.0988	0.5277	0.9854	7.4332	127.069	29.7335	6.67087	2.9e-09	2.13e-06	up
Unigene0043948	0.0858	1.3373	0.214	7.0067	118.171	40.436	6.66053	2.33e-08	8.84e-06	up
Unigene0037128	0	0.193	0	0.7592	13.2849	5.4363	6.65728	8.24e-07	8.72e-05	up
Unigene0027203	0	0	0.2111	2.0027	14.1846	5.1142	6.65688	7.02e-07	7.87e-05	up
Unigene0040174	0.1359	0	0	0.7716	9.8228	3.0959	6.65446	4.14e-07	5.62e-05	up
Unigene0024770	0	0.0476	0	0.3038	3.8388	0.6464	6.65262	0.000120244	0.0031454	up
Unigene0064833	0	0.0886	0	2.449	5.1801	1.2778	6.65147	1.51e-05	0.000689367	up
Unigene0044332	0.0435	0	0.781	3.1702	71.254	8.2466	6.64771	4.29e-06	0.00027121	up
Unigene0038773	0.7966	0.0788	0.6179	2.4289	127.958	19.3159	6.64746	2.45e-07	4.11e-05	up
Unigene0013022	0	0.071	0	1.0191	4.6862	1.3554	6.63585	8.73e-07	9.09e-05	up
Unigene0002209	0	0	0.0587	1.0581	3.5267	1.2443	6.63377	7.57e-06	0.000405328	up
Unigene0066052	0	0.7676	0.86	11.2611	103.489	46.6252	6.63153	9.01e-10	9.37e-07	up
Unigene0058816	0	0	0.074	6.461	0.7607	0.1121	6.63089	0.000395863	0.00775155	up
Unigene0003476	0	0.1298	0	0.6997	9.7063	2.4458	6.62954	1.4e-06	0.000124859	up
Unigene0048553	0.0553	0.0492	0	0.314	8.8312	1.1903	6.62796	2.1e-06	0.000165215	up
Unigene0023645	0	0.0579	0	0.3076	5.0235	0.3927	6.62727	0.00030434	0.00630682	up
Unigene0040238	0	0.2156	0	2.6739	15.1507	3.4141	6.62219	7.43e-08	1.88e-05	up
Unigene0006548	0.2898	0	0.1445	0.4114	34.9621	7.1125	6.61215	5.6e-06	0.000328782	up
Unigene0026420	0	0.055	0	0.76	3.7995	0.7931	6.60466	4.43e-05	0.0014977	up
Unigene0026523	0	0.0629	0	0.7693	4.5431	0.7741	6.59641	3.68e-06	0.000244409	up
Unigene0053948	0.1846	0.1096	0.1228	0	40.2818	0	6.59394	0.00224272	0.0291261	up
Unigene0035853	0	0.0581	0	0.247	4.5027	0.8624	6.59386	1.89e-05	0.000812697	up
Unigene0061252	0	0.058	0	0.4315	3.8776	1.2789	6.59014	3.46e-06	0.000234267	up
Unigene0013014	0	0.0679	0	0.3611	4.9951	1.1815	6.58923	1.02e-05	0.000507689	up
Unigene0008521	0	0.0832	0	0.84	5.71	1.4465	6.58664	2.78e-06	0.000199358	up
Unigene0044896	0.226	0	0	0.5134	17.574	3.6017	6.5845	8.52e-06	0.000443228	up
Unigene0002187	0.0333	0.0594	0.0166	0.0947	8.5319	1.813	6.57763	1.47e-06	0.000129088	up
Unigene0001702	0.275	0.4895	1.2797	15.0043	117.146	62.4977	6.57319	7.11e-12	3.19e-08	up
Unigene0072219	0	0.0786	0	1.6707	4.8724	0.9333	6.57167	3.67e-05	0.00130897	up
Unigene0029513	0	0.0782	0	0.0554	6.6933	0.6852	6.57081	0.000128417	0.00329792	up
Unigene0026980	0	0	1.0026	1.6022	65.3742	28.208	6.56891	2.21e-05	0.000913436	up
Unigene0002503	0.0655	0	0	0.372	5.476	0.3463	6.5633	0.000252634	0.00546769	up
Unigene0036081	0	0.0874	0	0.8366	6.7771	0.6305	6.5596	1.66e-05	0.000741021	up
Unigene0056274	0	0.1665	0	3.8942	11.2585	0.5179	6.55639	6.12e-06	0.000351646	up
Unigene0028419	0	0.0656	0	0.6977	4.418	1.0578	6.55625	6.35e-05	0.00197654	up
Unigene0016995	0	0.0733	0	0.4674	5.8417	0.5595	6.55006	2.84e-05	0.0010969	up
Unigene0044920	0.3583	0.1595	0.5583	2.8395	78.7499	18.9731	6.54614	2.55e-09	1.93e-06	up
Unigene0058012	0	0.0571	0	0.3035	4.3493	0.6781	6.54474	0.000206246	0.00466542	up
Unigene0057053	0	0.0566	0	0.8417	3.9575	0.4798	6.54332	9.92e-05	0.00273743	up
Unigene0007709	0.7185	0.9594	0.4478	9.1363	145.351	43.4735	6.54114	4.16e-11	1.07e-07	up
Unigene0008125	0.0904	0	0	1.5401	5.5609	1.2973	6.53763	1.91e-05	0.000815354	up
Unigene0042543	0.0531	0.1181	0	0.6529	12.2834	2.966	6.53741	1.79e-07	3.37e-05	up
Unigene0032163	0	0.0579	0	0.6767	4.3058	0.3927	6.53661	0.000169822	0.00403243	up
Unigene0047537	0	0.5296	0	2.2252	39.6751	7.0602	6.53057	1.13e-05	0.000552213	up
Unigene0008539	0	0.085	0	6.9989	0.6772	0.1441	6.5236	0.000140336	0.00351232	up
Unigene0028812	0	0.0591	0	1.3829	3.0378	1.0032	6.52003	2.03e-05	0.000853369	up
Unigene0042525	0.064	0.171	0.0639	1.01	17.6811	8.7044	6.51813	2.64e-10	4.03e-07	up
Unigene0027222	0	0.0658	0	1.5382	3.3208	1.1717	6.51809	1.87e-05	0.000809328	up
Unigene0068521	0	0.0557	0	1.0068	3.7997	0.2836	6.51387	0.00015992	0.00385208	up
Unigene0030514	1.8507	5.3543	1.2305	15.1054	526.995	228.098	6.51261	5.93e-09	3.3e-06	up
Unigene0067595	0	0.0757	0	0.4426	5.4643	0.9953	6.51062	1.5e-05	0.000687848	up
Unigene0049371	0.0545	0.0485	0.0906	0.7482	13.7517	3.1501	6.51045	7.06e-10	7.93e-07	up
Unigene0030717	0	0.0598	0	0.7634	3.6044	1.066	6.50567	4.76e-05	0.00158196	up
Unigene0003271	0	0.3916	0	28.2393	3.411	3.8205	6.50111	1.47e-06	0.000129088	up
Unigene0001467	0	0.0897	0	0.8579	5.8778	1.3693	6.49756	8.62e-05	0.00246228	up
Unigene0027251	0.2388	0.1063	0.2381	1.3556	40.0516	10.9979	6.48957	3.28e-08	1.15e-05	up
Unigene0004820	0	0.1478	0	11.2359	1.2439	0.6897	6.47741	4.48e-05	0.00151067	up
Unigene0035136	0.0972	0	0	0	6.5934	2.0559	6.47548	0.00104677	0.0163898	up
Unigene0058966	0	0.0404	0	0.3007	2.5054	0.7884	6.47529	9.71e-05	0.00269002	up
Unigene0037340	0	0.1297	0	1.3786	8.0987	2.0353	6.47189	3.31e-07	4.79e-05	up
Unigene0069386	0	0.0714	0	1.2136	4.1713	0.9382	6.46856	1.93e-06	0.000157054	up
Unigene0004027	0	0.2574	0	1.0262	17.6144	4.1491	6.46823	4.22e-06	0.000267939	up
Unigene0039293	0	0.2254	0	1.3272	12.5185	6.0165	6.46139	4.96e-07	6.32e-05	up
Unigene0056633	0	0.0966	0	2.4655	5.3071	0.7378	6.46106	7.47e-05	0.00220867	up
Unigene0006990	0	0.0533	0	0.5668	3.4952	0.6333	6.46094	0.000113822	0.00302556	up
Unigene0038222	0.0818	0.0364	0	1.8194	7.1931	1.3901	6.45957	1.18e-07	2.56e-05	up
Unigene0060636	0	0.0637	0	0.3388	3.6979	1.568	6.4592	7.59e-06	0.000405964	up
Unigene0048047	0.3024	0.1514	0.0754	1.1267	35.9274	9.4475	6.45732	1.3e-08	5.84e-06	up
Unigene0058028	0.1513	0.0898	0.2515	1.4082	31.6804	10.1516	6.45581	2.22e-09	1.79e-06	up
Unigene0007767	0	0.1112	0	0.4729	6.9696	2.3114	6.45475	2.34e-06	0.000175544	up
Unigene0006198	0	0.073	0	0.8537	4.8503	0.6813	6.45071	8.96e-06	0.000462307	up
Unigene0004762	0.0254	0.0453	0	0.5295	4.8729	0.7682	6.44756	1.3e-06	0.000119375	up
Unigene0033895	0	0	0.0843	0.8396	5.6964	0.7976	6.44285	6.49e-06	0.000366442	up
Unigene0067858	0	0.0902	0	0	5.9133	1.9132	6.4391	0.00154148	0.0218058	up
Unigene0036207	0.1358	0	0.1354	2.0562	19.3824	2.0511	6.43653	8.24e-06	0.000431483	up
Unigene0031863	0	0	0.1317	0.1875	7.8621	3.3409	6.43443	3.73e-05	0.00132596	up
Unigene0044387	0.1364	0.1821	0	0.5162	20.8321	6.1784	6.43339	8.98e-07	9.27e-05	up
Unigene0024656	0	0.0518	0	0.9903	2.888	0.5707	6.42439	6.52e-05	0.0020141	up
Unigene0037690	0	0.1007	0	0.7494	5.7093	2.1786	6.42244	4.85e-06	0.000296379	up
Unigene0005176	0.0757	0	0	0.2866	5.3139	0.8577	6.4147	0.000232458	0.00511387	up
Unigene0035616	0.3633	0	0	0.9741	23.3945	6.5843	6.41277	5.7e-06	0.000333852	up
Unigene0019673	0	0.0899	0	0.3824	6.0548	1.2208	6.4125	0.000300222	0.00624131	up
Unigene0007005	0	0.0645	0	0.617	3.7133	1.1489	6.40852	8.82e-05	0.00249641	up
Unigene0033782	0.0535	0.1428	0	0.4047	11.2334	5.0057	6.40578	4.83e-07	6.23e-05	up
Unigene0039334	0	0.0413	0.0463	1.3171	5.1217	0.981	6.40431	1.4e-06	0.000125122	up
Unigene0046643	0.0525	0.0935	0.1047	0.2484	19.02	1.9425	6.4027	2.12e-06	0.000165615	up
Unigene0043982	0.9015	0.0845	0.1893	3.1429	78.0034	17.2697	6.38779	1.21e-07	2.59e-05	up
Unigene0065479	0	0.074	0	1.1014	3.9331	1.1614	6.38764	1.98e-06	0.000159741	up
Unigene0057998	0	0.0829	0	0.5731	4.7022	1.6536	6.38511	7.13e-06	0.000390543	up
Unigene0009930	0.0594	0.0529	0	0.6748	5.9975	2.67	6.37835	9.73e-08	2.25e-05	up
Unigene0021767	0	0.0574	0	0.6104	3.8149	0.341	6.37568	0.0002952	0.00616009	up
Unigene0034199	0	0.0447	0.0501	0.5231	5.6665	1.6508	6.3699	2.77e-07	4.31e-05	up
Unigene0048196	0.126	1.0658	0.0419	4.5717	77.5615	19.8748	6.36955	3.37e-07	4.85e-05	up
Unigene0018563	0	0.0538	0	0.0572	3.4314	0.9585	6.36911	0.000758091	0.0127892	up
Unigene0038066	0.0952	0	0	0.7204	5.3651	1.7606	6.36487	3.47e-06	0.000234473	up
Unigene0035747	0	0.1491	0	0.8718	8.6186	2.783	6.36311	1.44e-06	0.000127863	up
Unigene0027481	0	0.0834	0	0.1329	5.5558	1.1667	6.36105	2.96e-05	0.00112615	up
Unigene0041098	0.1273	0	0	0.6023	8.4319	1.3939	6.3561	2.11e-05	0.0008816	up
Unigene0037021	0	0.0934	0	1.2906	5.1287	1.2279	6.35537	2.77e-07	4.31e-05	up
Unigene0002321	0.0571	0	0	0	4.2807	0.3884	6.35351	0.00244185	0.0310937	up
Unigene0017849	0.0697	0	0	0.7919	4.2342	0.6583	6.34971	5.76e-06	0.000336455	up
Unigene0008423	0.0591	0.2105	0	1.5382	17.8276	2.6112	6.34903	2.42e-07	4.06e-05	up
Unigene0019644	0.1861	0.1657	0.0464	1.8051	23.662	6.9916	6.34897	8.81e-10	9.31e-07	up
Unigene0032133	0	0.1295	0	0.4131	8.4342	1.7034	6.34824	5.11e-05	0.00167709	up
Unigene0038968	0	0	0.0824	0.43	4.4952	1.7782	6.3461	6.37e-06	0.000360969	up
Unigene0036486	0.1665	0.778	0	1.7329	51.325	23.7284	6.34515	1.34e-06	0.000121817	up
Unigene0048193	0.1242	0.3318	0	1.7635	21.7968	13.51	6.34509	5.43e-08	1.54e-05	up
Unigene0021485	0	0.0727	0	0.6573	4.4459	0.8022	6.34394	1.28e-05	0.00060563	up
Unigene0012779	0	0.0625	0	0.7313	4.0714	0.2652	6.34139	4.16e-05	0.00143099	up
Unigene0024515	0.6024	0.1341	0.0751	1.6388	49.4269	14.6415	6.33914	1.07e-07	2.36e-05	up
Unigene0005626	0	0	0.1097	0.3643	6.8076	1.7026	6.33803	2.34e-05	0.000950806	up
Unigene0000881	1.3813	1.9907	0.656	7.9981	195.808	121.739	6.33665	7.03e-10	7.93e-07	up
Unigene0061045	0.0656	0	0	0.6827	3.1285	1.4857	6.33531	1.11e-06	0.000107088	up
Unigene0024653	0	0.0858	0	0.6385	5.4724	0.8007	6.3319	0.000280604	0.00591412	up
Unigene0008238	0	0.075	0	0.6381	4.0539	1.3366	6.32879	0.000118309	0.00310952	up
Unigene0039469	0.451	0	0	1.9206	26.2278	8.0038	6.32481	2.13e-06	0.000165715	up
Unigene0047954	0.5007	0.0891	0	4.264	36.4774	6.2761	6.31683	3.99e-07	5.48e-05	up
Unigene0014560	0.1303	0.116	0	3.0202	13.1994	3.3939	6.31529	4.07e-08	1.27e-05	up
Unigene0027418	0	0	0.1349	2.5599	7.4657	0.715	6.31504	8.22e-06	0.000431216	up
Unigene0058611	0	0.1074	0	1.0277	5.2329	2.278	6.31293	3.69e-06	0.000244496	up
Unigene0005320	0	0.0889	0	0.4724	4.4083	2.1863	6.31277	0.000165209	0.00395032	up
Unigene0048381	0	0.0821	0	0.3493	5.1299	1.0453	6.31234	3.79e-05	0.00134433	up
Unigene0044389	0.0315	0.14	0.2823	1.384	29.2402	5.4035	6.31091	4.26e-08	1.31e-05	up
Unigene0001007	0.0917	0	0	1.3877	5.0588	0.8305	6.31028	7.78e-05	0.00227681	up
Unigene0048675	0	0.0985	0.0662	0.7015	9.5	2.8656	6.30995	3.82e-08	1.25e-05	up
Unigene0033725	0	0.1557	0	0.2483	8.1385	3.9632	6.3096	1.59e-05	0.000717881	up
Unigene0044099	0	0.3057	0	0.2708	18.506	5.4034	6.30557	3.95e-05	0.00137701	up
Unigene0069743	0	0.1788	0	2.5661	10.0574	1.5168	6.30532	9.94e-06	0.000500283	up
Unigene0043704	0.857	0.3269	1.0989	6.8352	155.998	17.5655	6.30424	5.95e-08	1.62e-05	up
Unigene0025291	0	0.0658	0	0.839	3.9034	0.4464	6.30117	0.000244662	0.00533332	up
Unigene0029158	0.128	0.171	0.3192	0.4846	39.7761	8.339	6.29673	4.67e-07	6.09e-05	up
Unigene0010153	0	0.0977	0	1.2469	4.935	1.4925	6.29555	3.79e-06	0.000249614	up
Unigene0003663	0	0.5005	0	1.596	26.4131	11.2859	6.29483	3.66e-06	0.000243811	up
Unigene0015347	0	0.1239	0	1.3171	7.2436	1.1562	6.29325	1.44e-05	0.000662592	up
Unigene0030115	0	0.1405	0	0.4855	6.8615	3.6358	6.28853	1.89e-06	0.000153572	up
Unigene0043337	0	0.0713	0	4.3183	1.01	0.2418	6.28766	0.000474045	0.00885504	up
Unigene0013466	0.0243	0.0866	0	0.322	6.6317	1.7071	6.28717	2.04e-06	0.000162126	up
Unigene0008344	0.0394	0.0701	0.0393	1.7325	7.7146	2.1704	6.28678	3.42e-10	4.63e-07	up
Unigene0014669	0	0.0492	0	0.1046	3.3989	0.3339	6.28533	0.00112455	0.017265	up
Unigene0041755	0	0.1106	0	1.5284	6.3676	0.7036	6.28085	1.89e-05	0.000811612	up
Unigene0061169	0	0	0.062	0.2057	3.5267	1.0555	6.27098	2.34e-05	0.000950535	up
Unigene0048625	0.1609	0	0.0802	4.4151	13.8276	0.3645	6.27009	1.11e-05	0.000543962	up
Unigene0063939	0.0818	0	0	0.2323	4.9029	1.1739	6.26919	0.000323096	0.00659463	up
Unigene0048499	0.4962	6.0579	0.7777	15.3886	353.7	193.882	6.26275	1.76e-07	3.34e-05	up
Unigene0038049	0	0.0758	0.1698	15.6299	3.2223	0	6.26228	0.000303444	0.0062937	up
Unigene0043277	0.4662	0.4565	0.3255	3.8604	73.1007	18.6244	6.25887	3.4e-10	4.63e-07	up
Unigene0006112	0.0465	0.0828	0	0.3962	7.7681	1.7303	6.25785	3.9e-07	5.38e-05	up
Unigene0027041	0	0.1697	0	1.5331	10.2193	1.2234	6.25669	3.16e-05	0.00117503	up
Unigene0050090	0	0.137	0	1.3105	7.4012	1.743	6.25383	1.08e-05	0.000531525	up
Unigene0029587	0	0.124	0	1.4833	6.0975	1.8676	6.25166	3.37e-07	4.85e-05	up
Unigene0039166	0.0731	0.0651	0	0.7953	8.2116	1.5177	6.25086	8.66e-07	9.02e-05	up
Unigene0032406	0	0	0.1904	0.3614	11.8197	2.3072	6.24971	2.43e-05	0.000977277	up
Unigene0016707	0	0.0834	0	0.4433	3.8419	2.052	6.24765	1.26e-05	0.000600915	up
Unigene0038162	0.105	0	0	0.2981	5.8778	1.7839	6.24427	3.04e-05	0.00114695	up
Unigene0004026	0	0	0.2948	0.9789	16.8954	4.4637	6.24362	2.84e-05	0.0010969	up
Unigene0031743	0	0.1618	0	1.7205	9.0317	1.4416	6.23579	1.78e-05	0.000781133	up
Unigene0009149	0	0.1693	0	0.9601	10.4	1.3887	6.23464	5.96e-06	0.000344822	up
Unigene0020620	0	0.0578	0	0.2456	3.0185	1.0779	6.23115	0.000322839	0.00659441	up
Unigene0019758	0	0.0555	0	0	2.8023	1.3654	6.23062	0.00210829	0.0277263	up
Unigene0021815	0	0.0868	0	0.8766	4.5365	1.1046	6.23052	1.04e-05	0.000518288	up
Unigene0022823	0	0	0.0688	1.1104	3.3743	0.6776	6.22946	7.66e-05	0.0022493	up
Unigene0003761	0	0.1572	0.1761	1.1695	14.8956	8.9326	6.22883	5.63e-07	6.78e-05	up
Unigene0001571	0.1252	0.0371	0	0.5922	9.4911	2.0794	6.22766	6.92e-07	7.82e-05	up
Unigene0001683	0	0.0609	0	0.4535	2.9689	1.1373	6.22635	0.000171383	0.00406085	up
Unigene0039170	0	0.1282	0	1.7711	7.1517	0.6523	6.22282	0.000358376	0.00716203	up
Unigene0026428	0	0.1162	0	1.7292	5.7634	1.1828	6.22225	7.89e-06	0.000417624	up
Unigene0028596	0.0657	0.0585	0	0.4353	5.9325	2.9028	6.22193	6.99e-07	7.86e-05	up
Unigene0007770	0.1563	0.0927	0.1039	1.2076	18.1947	6.9228	6.22104	1.58e-09	1.38e-06	up
Unigene0064355	0	0.0418	0	0.3552	2.4046	0.3543	6.21917	0.000337135	0.00681723	up
Unigene0015808	0	0.0828	0	0.7925	4.659	0.7027	6.2158	2.37e-05	0.00096112	up
Unigene0035968	0.0784	0	0	0.3708	3.1827	2.249	6.20968	7.34e-06	0.00039702	up
Unigene0041286	0	0.2118	0	0.3377	13.7878	1.5271	6.20756	0.000266427	0.0056886	up
Unigene0009234	0.1636	0	0	2.2453	7.806	2.0389	6.20752	2.75e-06	0.000197978	up
Unigene0038158	0.1865	0.1245	0	0.3088	18.9139	3.6615	6.20129	5.18e-06	0.000310929	up
Unigene0042370	0	0.0656	0	0.4884	3.8367	0.5011	6.20105	0.000441975	0.00841358	up
Unigene0002265	0.3338	0.1114	0.2913	0.7502	46.7647	6.6636	6.20089	3.79e-07	5.28e-05	up
Unigene0034565	0.7233	2.2939	0.1803	6.5454	185.15	42.5033	6.19465	2e-07	3.64e-05	up
Unigene0046712	0	0.1224	0.0686	0.9757	10.4608	2.5176	6.19097	2.67e-07	4.25e-05	up
Unigene0043666	0.7519	1.0784	2.0831	6.0877	237.985	40.8518	6.18601	3.68e-08	1.22e-05	up
Unigene0046422	0.1978	0.2289	0.0789	1.488	27.2455	7.9907	6.18259	1.12e-09	1.11e-06	up
Unigene0044436	0	0.1881	0	0.4499	9.622	3.5903	6.18255	1.36e-05	0.000635975	up
Unigene0043849	0.1336	0.0595	0	1.2014	11.8551	0.9588	6.18151	1.14e-05	0.000555778	up
Unigene0019178	0	0.0794	0	1.3508	3.7283	0.6737	6.17898	0.000177652	0.00417173	up
Unigene0022827	0.0405	0.036	0	1.3019	3.3182	0.9167	6.17745	1.54e-06	0.000132893	up
Unigene0029628	0.1068	0.2377	0.0533	2.4262	19.7954	6.5345	6.17568	4.85e-10	6.11e-07	up
Unigene0049751	0.3554	1.3385	0.7634	4.8895	120.653	52.0045	6.17498	2.84e-09	2.1e-06	up
Unigene0060877	0.2282	0.1016	0	1.7275	18.2631	3.748	6.1695	5.57e-07	6.74e-05	up
Unigene0000599	0	0.0818	0	0.3479	4.5654	0.9716	6.16877	0.000536625	0.00973093	up
Unigene0009542	0	0.1009	0	0.5362	5.0041	1.7116	6.16736	2.44e-05	0.000978644	up
Unigene0031334	0.2463	1.7178	0.2866	13.4044	106.156	41.64	6.16234	1.25e-09	1.2e-06	up
Unigene0039253	0	0	0.097	0.5214	4.3445	2.0803	6.1621	2.28e-06	0.000173029	up
Unigene0065422	0.0625	0.0557	0	0.7692	5.9654	1.7234	6.16101	3.46e-07	4.91e-05	up
Unigene0008034	0	0.0922	0	0.3429	5.6737	0.5473	6.15364	0.000154393	0.00375677	up
Unigene0066632	0.259	0	0	1.4707	14.5016	2.4451	6.15197	2.82e-05	0.00109137	up
Unigene0053880	2.7571	0.409	0.6874	9.349	233.703	30.4496	6.14923	2.64e-07	4.25e-05	up
Unigene0055017	0	0.1086	0	0.7503	5.4343	1.4738	6.13995	2.28e-05	0.000934056	up
Unigene0046114	0	0.2075	0.186	1.125	18.7853	7.8335	6.13966	1.1e-07	2.4e-05	up
Unigene0071872	0	0.0846	0	0.8093	4.6456	0.5023	6.13783	0.0004952	0.00913848	up
Unigene0019713	0	0.058	0	0.4931	2.3112	1.2789	6.1375	0.000148405	0.00364938	up
Unigene0063729	0	0.0665	0	0.3181	2.8276	1.5233	6.13362	2.17e-05	0.000901237	up
Unigene0050629	0.0449	1.009	0.1791	4.0144	57.4575	24.933	6.13087	1.59e-07	3.13e-05	up
Unigene0033342	0	0.1595	0	0.6219	8.0551	2.4587	6.12549	4.57e-06	0.000283155	up
Unigene0012714	0	0.1342	0	1.6763	6.1519	1.5085	6.12046	8.97e-07	9.27e-05	up
Unigene0043315	0	0.2148	0	0.4567	12.6542	1.8224	6.1194	0.000205033	0.004649	up
Unigene0044363	0	0.1348	0	0.2866	5.702	3.3451	6.11356	1.46e-05	0.000668612	up
Unigene0057930	0	0.0889	0	0.5668	5.2218	0.3518	6.11001	5.68e-05	0.0018131	up
Unigene0010277	0	0	0.1372	1.4976	6.565	1.403	6.10834	1.76e-06	0.000147173	up
Unigene0040541	0	0.0976	0	0.5965	4.3867	1.7384	6.10578	2.15e-06	0.00016597	up
Unigene0070441	0	0.2784	0	1.9238	13.6875	3.5428	6.10435	3.2e-06	0.000220755	up
Unigene0045742	2.1097	1.2207	1.1572	6.6381	252.44	49.2685	6.10247	2.26e-08	8.68e-06	up
Unigene0049803	0.0634	0.0753	0.0843	0.9601	10.9667	3.3679	6.09984	4.33e-09	2.7e-06	up
Unigene0045484	0	0.1249	0	0.6936	5.3982	2.4731	6.09959	1.04e-06	0.000102786	up
Unigene0068251	0	0.0773	0	0.4517	3.8324	1.0159	6.09938	3.44e-05	0.00125117	up
Unigene0024477	0	0.1367	0	1.2349	7.0211	1.1014	6.09702	3.62e-05	0.00130016	up
Unigene0055432	0	0.0766	0	0.7325	3.6623	0.8444	6.09586	0.000283864	0.0059599	up
Unigene0048209	0.1879	0	0	0.3557	11.558	0.9224	6.0941	0.00025548	0.00551059	up
Unigene0047684	0.0857	0.1907	0.0641	1.7235	16.3296	5.186	6.09276	1.39e-10	2.53e-07	up
Unigene0049456	0.3541	0.1146	0.0321	1.5232	27.0847	5.567	6.09256	8.81e-08	2.06e-05	up
Unigene0037816	0	0.1238	0	0.702	5.9042	1.8381	6.09189	2.02e-06	0.000161776	up
Unigene0027902	0	0.1026	0	1.4181	4.0902	1.4798	6.0898	0.000145165	0.00359062	up
Unigene0024624	0.1052	0.1872	0.035	0.7961	18.0618	3.4278	6.08892	8.11e-08	1.99e-05	up
Unigene0034194	0	0.8344	0.4006	4.055	55.5663	24.4212	6.08854	3.23e-07	4.75e-05	up
Unigene0061467	0.2366	0.5793	0	3.3871	39.0454	12.8667	6.08272	1.74e-07	3.31e-05	up
Unigene0040668	0	0	0.0561	0.4261	2.4409	0.935	6.08261	0.000142048	0.00354034	up
Unigene0012687	0.025	0.0891	0	0.3553	5.6947	1.6635	6.07901	6.58e-07	7.58e-05	up
Unigene0040814	0	0.0359	0.0402	0.0572	4.4507	0.6241	6.07548	5.65e-05	0.00180702	up
Unigene0056188	0	0.0848	0	1.4429	3.9825	0.2879	6.07412	0.000623961	0.0109464	up
Unigene0015997	0	0.0676	0	0.8618	3.1716	0.5158	6.07245	0.000346996	0.00698711	up
Unigene0036736	0	0.1037	0	0.8542	5.3038	0.8136	6.071	6.44e-06	0.000364121	up
Unigene0064646	0.1481	0.1318	0.0739	2.0321	17.6626	4.0541	6.06878	7.59e-09	4.01e-06	up
Unigene0069812	0.0627	0	0	0	3.8563	0.3314	6.06155	0.00433173	0.0484926	up
Unigene0056876	0	0.3664	0	1.6553	19.0668	3.7298	6.06038	1.33e-05	0.000623947	up
Unigene0027569	0	0	0.1012	0.7203	4.9219	1.1114	6.06038	1.87e-05	0.000806832	up
Unigene0015074	0.0491	0.0438	0	0.4884	4.2436	1.4661	6.06	6.51e-07	7.53e-05	up
Unigene0064072	0	0.1088	0	0.4626	4.577	2.2148	6.05911	3.54e-05	0.00127885	up
Unigene0001579	0	0.3156	0.0442	1.4677	18.2041	4.2832	6.05699	9.04e-07	9.31e-05	up
Unigene0005617	0.7214	0.6422	0	5.4612	70.5335	14.6177	6.05422	2.65e-07	4.25e-05	up
Unigene0043591	0.0785	0	0	0.5198	3.8051	0.8888	6.05347	2.05e-05	0.00086186	up
Unigene0061412	0.0441	0	0.044	0.1669	4.501	1.1817	6.05305	1.23e-05	0.000588206	up
Unigene0012167	0.0923	0.0411	0	0.852	6.7718	1.2029	6.04804	6.8e-07	7.72e-05	up
Unigene0001205	0	0.1084	0	0.7489	5.0884	1.2873	6.03837	3.36e-05	0.00122911	up
Unigene0019891	0	0	0.0959	0.8186	4.3957	1.0887	6.03836	0.000203376	0.004622	up
Unigene0031411	0	0	0.074	0.2809	3.6281	0.9527	6.03779	0.00042761	0.00822957	up
Unigene0009084	0	0.116	0	1.9724	5.29	0.3443	6.03507	8.14e-05	0.00235712	up
Unigene0067529	0	0.0674	0	1.0748	1.9703	1.3723	6.03431	0.00010014	0.0027529	up
Unigene0069672	0	0.0569	0	0.3628	2.9725	0.386	6.03123	0.000776343	0.0130124	up
Unigene0037125	0	0.0529	0	0.1124	2.762	0.5828	6.03019	0.00123941	0.0185438	up
Unigene0070633	0	0.0711	0	0.8314	3.2118	0.6031	6.03009	0.000372785	0.00738433	up
Unigene0028872	0.099	0	0	1.03	4.0572	1.345	6.02174	0.000134935	0.00341511	up
Unigene0027453	0.0829	0.812	0.0827	4.1984	40.6723	18.4114	6.01641	3.86e-08	1.25e-05	up
Unigene0037019	0	0.0685	0.0512	0.3398	5.2374	2.1497	6.01239	1.46e-06	0.000128547	up
Unigene0035315	0.0808	0.072	0	1.2621	6.979	1.6175	6.01167	5.13e-07	6.44e-05	up
Unigene0044484	0.0557	0.0992	0	0.4218	7.4254	2.146	6.01154	1.77e-06	0.00014721	up
Unigene0043754	0	0.231	0	2.5788	11.153	1.1269	6.00727	1.07e-05	0.000526931	up
Unigene0028677	0	0.054	0	0.4592	2.9655	0.0458	6.00604	0.00275564	0.034029	up
Unigene0038774	0	0.0614	0.0688	0.7838	5.9594	1.6158	6.00453	8.54e-07	8.92e-05	up
Unigene0011317	0	0.114	0	0.8481	5.502	0.9668	6.00413	5.3e-05	0.00172543	up
Unigene0041948	0.0884	0.0394	0.0441	0.4604	7.3928	3.1727	6.00318	1.06e-07	2.36e-05	up
Unigene0018555	0.13	0	0	0.6152	7.2789	0.4418	6.00275	0.000179941	0.00421418	up
Unigene0054232	0	0.0701	0	0.8942	2.1731	1.4271	6.00257	0.000143948	0.00356913	up
Unigene0029178	0	0	0.1282	0.973	6.0805	1.1647	6.00235	2.58e-05	0.0010173	up
Unigene0006331	0	0.0688	0	0.1463	4.1443	0.1167	6.00134	0.00401512	0.0456975	up
Unigene0053256	0	0.0656	0	0.5581	3.081	0.5567	5.99911	0.000531828	0.0096605	up
Unigene0007786	0	0.136	0	0.47	7.5615	0.6636	5.99852	6.87e-05	0.00208762	up
Unigene0032761	0	0.1012	0	0.7532	5.0659	0.644	5.99695	8.21e-05	0.00237301	up
Unigene0010619	0	0.0939	0	0.5989	4.242	1.155	5.99671	4.02e-05	0.00139449	up
Unigene0004982	0	0	0.2645	2.3839	13.5909	0.9011	5.99555	8.82e-05	0.00249641	up
Unigene0003871	0	0.3679	0	0.9777	18.5205	3.9531	5.99421	2.2e-05	0.000908769	up
Unigene0042675	0	0.3351	0	1.1082	16.4901	3.7586	5.99397	1.22e-05	0.000587194	up
Unigene0046274	0.103	0.0458	0	0.2436	7.8356	1.3997	5.99327	1.41e-05	0.000651154	up
Unigene0031565	0	0.0867	0	0.3686	3.5318	1.6177	5.992	4.53e-05	0.00152359	up
Unigene0026096	0	0.0836	0	0.1778	4.149	0.9934	5.99183	0.00127808	0.0189965	up
Unigene0037452	0.3983	0.4333	0	1.1098	46.8285	4.9292	5.99035	1.52e-05	0.0006917	up
Unigene0069446	0	0.1157	0	1.3534	4.8184	1.1782	5.98928	0.000318306	0.006534	up
Unigene0043335	0	0.0768	0	1.9585	2.6518	0.2605	5.98691	0.000610662	0.0107736	up
Unigene0005323	0	0.0691	0	0.147	3.0614	1.1727	5.98646	0.00101172	0.0159176	up
Unigene0041813	0.0673	0.1797	0	1.0188	10.0017	4.6242	5.98502	1.82e-07	3.4e-05	up
Unigene0035641	0	0.1229	0	0.5878	6.2043	0.9903	5.98466	0.000110069	0.0029381	up
Unigene0006288	0.6804	0.424	0.2714	3.9277	63.845	19.3196	5.9842	5.6e-09	3.23e-06	up
Unigene0000935	0.0775	0	0	0.4399	4.3371	0.117	5.98067	0.00178577	0.0243778	up
Unigene0038442	0.4237	0.1257	0	0.4678	29.4013	4.7996	5.97963	2.09e-05	0.000874817	up
Unigene0018832	0	0	0.1125	0.4268	4.7121	1.9584	5.97927	3.37e-05	0.00123008	up
Unigene0023268	0	0.1023	0	0.7066	5.0273	0.694	5.97347	8.67e-05	0.00247244	up
Unigene0041788	0	0.2188	0	10.1741	2.18	1.3918	5.97324	8e-06	0.000422764	up
Unigene0006026	0.1143	0	0	0.7571	4.5961	1.8125	5.97021	1.42e-05	0.000655894	up
Unigene0003348	0	0	0.0742	1.2669	2.9324	0.4493	5.96923	0.0002442	0.00532487	up
Unigene0044492	0.3031	0.4947	0	0.3824	33.3813	16.2135	5.9691	1.23e-05	0.000588528	up
Unigene0018068	0	0.0839	0	0.535	3.8635	0.8539	5.96816	0.000613693	0.0108111	up
Unigene0044173	0	0.2215	0.0993	1.0832	12.6756	6.314	5.96742	1.48e-07	3.01e-05	up
Unigene0054869	0	0.0916	0	1.2658	4.3002	0.1554	5.96488	0.00146839	0.0210202	up
Unigene0064135	0	0.0696	0	0.37	3.2677	0.7086	5.96456	0.000723775	0.012312	up
Unigene0006484	0	0.1255	0	7.1356	0.2223	0.479	5.96452	0.000660645	0.0114665	up
Unigene0033426	0	0.1016	0	0.5399	5.5779	0.2154	5.96196	0.000424247	0.00819339	up
Unigene0031996	0.1047	0	0	0.6933	4.2914	1.5412	5.96184	1.62e-05	0.000728251	up
Unigene0003214	0.0757	0	0	0.8599	3.3436	0.5146	5.96177	0.000311475	0.00642542	up
Unigene0008118	0	0.1044	0	1.2764	4.3004	0.93	5.96175	2.51e-05	0.00100029	up
Unigene0035625	0.0512	0.205	0	1.9855	11.1167	2.8597	5.96122	7.2e-08	1.85e-05	up
Unigene0007558	0.102	0	0	0	4.5825	1.7709	5.96089	0.00283022	0.0347036	up
Unigene0000349	1.3622	4.2441	1.0189	3.7061	287.796	119.97	5.95669	5.79e-07	6.93e-05	up
Unigene0032128	0	0.0861	0	0.5489	4.4211	0.365	5.95333	0.00133721	0.0196678	up
Unigene0029799	0.1483	0.4289	0	1.8941	28.2914	5.5701	5.95295	1.07e-06	0.000104351	up
Unigene0015288	0.2267	0.6053	0	6.22	39.4964	5.8193	5.95284	4.24e-07	5.67e-05	up
Unigene0024224	0	0.0858	0	0.3649	4.1803	0.7643	5.95145	0.000121899	0.00317712	up
Unigene0064816	0	0	0.0822	1.0139	2.0796	1.9916	5.95099	7.87e-05	0.00229654	up
Unigene0013448	0.1447	0	0	0.8672	5.9517	2.1307	5.95069	2.19e-06	0.000168385	up
Unigene0016695	0	0.0858	0	1.3682	3.5723	0.364	5.9501	0.00066856	0.0115649	up
Unigene0053720	0	0.0848	0	0.9018	3.9074	0.4318	5.94963	0.000771144	0.0129374	up
Unigene0034206	0	0.0944	0.0529	1.355	6.6909	1.0413	5.94701	3.65e-07	5.11e-05	up
Unigene0033268	0.0645	0.0574	0	1.1904	5.4172	0.8769	5.94014	1.03e-06	0.000102108	up
Unigene0028286	0	0.1214	0	0.6452	5.9674	0.8238	5.93676	0.000131224	0.00334725	up
Unigene0016616	0	0.1746	0	0.5569	8.43	1.7036	5.93613	0.000159276	0.00384043	up
Unigene0035373	0	0.1731	0	1.3801	7.8967	1.3216	5.9361	6.52e-05	0.00201466	up
Unigene0002692	0	0.0923	0	0.2453	4.6196	0.783	5.93524	0.000226224	0.00501116	up
Unigene0043506	0.0375	0.0835	0.0748	1.3493	8.0327	2.5785	5.93275	1.42e-09	1.29e-06	up
Unigene0002871	0	0.1932	0	0.7074	9.3745	1.7118	5.93178	1.6e-05	0.000718682	up
Unigene0018213	0	0.068	0	1.1569	2.4703	0.5193	5.93022	0.000357787	0.00715625	up
Unigene0052174	0	0.0608	0	0.2586	2.8282	0.6191	5.92961	0.000108435	0.00291946	up
Unigene0018131	0	0.0808	0	1.0309	2.756	1.1312	5.9276	1.14e-05	0.000555554	up
Unigene0037817	0.045	0.0802	0	0.5539	5.8581	1.2071	5.92731	1.27e-06	0.00011831	up
Unigene0002497	0.0487	0.13	0	0.8293	8.4264	1.6177	5.92712	8.54e-07	8.92e-05	up
Unigene0005715	2.6113	4.3807	2.0032	7.6982	399.681	139.929	5.92705	6.58e-08	1.74e-05	up
Unigene0010842	0.053	0.0825	0	1.0397	6.0645	1.1396	5.92694	9.57e-08	2.22e-05	up
Unigene0005701	0	0.1135	0	0.9052	3.9725	2.0226	5.92589	1.91e-05	0.000815494	up
Unigene0005263	0	0.245	0	1.1395	10.7699	2.9618	5.9236	5.52e-06	0.000324971	up
Unigene0035850	0	0.1318	0	0.6307	4.9046	2.4604	5.9228	4.45e-05	0.00150072	up
Unigene0056501	0	0.1151	0	0.1223	6.2176	0.6345	5.92111	0.000751333	0.012694	up
Unigene0066116	0	0.072	0	0.6119	3.3142	0.4273	5.918	0.000838369	0.0137945	up
Unigene0035509	0	0.0476	0.1067	0.81	6.2434	2.2624	5.91587	4.19e-07	5.63e-05	up
Unigene0033884	0.0779	0	0.0777	0.7374	6.9735	1.677	5.91489	3.49e-06	0.000235081	up
Unigene0061230	0	0.0584	0	0.0621	3.1574	0.2974	5.91219	0.00363733	0.0422756	up
Unigene0030440	0.0964	0	0	0.5473	4.6744	0.5823	5.91187	8.57e-05	0.00245086	up
Unigene0013773	0	0.111	0	0.885	4.5558	1.2399	5.91137	2e-06	0.000161045	up
Unigene0065399	0	0.0691	0	1.1022	2.8777	0.1759	5.9103	0.0011501	0.0175373	up
Unigene0049283	0	0.072	0	0.306	3.8241	0.1831	5.90462	0.00264836	0.0330435	up
Unigene0065104	0	0.1187	0	0.568	5.4162	1.1079	5.90082	0.000108596	0.0029216	up
Unigene0016596	0.0893	0.0398	0	1.2258	4.2264	2.2599	5.90056	5.36e-07	6.62e-05	up
Unigene0003956	0.0784	0	0	0.5192	3.2754	0.8878	5.90025	0.000361936	0.00722714	up
Unigene0047986	0.0895	0.1706	0.102	0.7074	17.1648	3.7539	5.90024	1.16e-08	5.44e-06	up
[truncated: 4,475 more rows]
