# Supplementary material for: Transcriptome Analysis Reveals the Molecular Response to Salinity Challenge in Larvae of the Giant Freshwater Prawn Macrobrachium rosenbergii
Source: Front Physiol. 2022 Apr 29;13:885035. doi: 10.3389/fphys.2022.885035 (PMC9099292; doi:10.3389/fphys.2022.885035)
Supplement: Supplementary file 2 [file Table3.XLSX]

## Sheet: Sheet1
Table S3 Identification of differentially expressed genes between S10 VS S16.
GeneID	S10-1_rpkm	S10-2_rpkm	S10-3_rpkm	S16-1_rpkm	S16-2_rpkm	S16-3_rpkm	log2 Ratio(T3/T1)	Pvalue	FDR	significant
Unigene0003775	0	0	0	41.0785	1.1475	31.3269	14.5815	3.31725e-12	3.55322e-09	up
Unigene0056406	0	0	0	0.1273	32.3867	35.8755	14.4765	4.7616e-09	1.63503e-06	up
Unigene0002406	0	0	0	24.57	2.3695	16.1753	13.8109	2.78454e-17	1.33223e-13	up
Unigene0051329	0	0	0	3.1979	15.8845	20.1556	13.675	5.07035e-14	8.4623e-11	up
Unigene0003720	0	0	0	0.7101	17.425	19.7015	13.6225	1.38975e-11	1.23132e-08	up
Unigene0045250	0	0	0	29.3071	6.2719	0	13.5338	6.36598e-07	9.02887e-05	up
Unigene0039424	0	0	0	30.7035	2.137	0	13.4182	2.18439e-06	0.000250824	up
Unigene0008420	0	0	0	0.0971	19.828	11.9656	13.3759	2.42842e-08	6.52726e-06	up
Unigene0070198	0	0	0	27.7467	3.3582	0.1537	13.347	9.96558e-07	0.000130987	up
Unigene0027815	0	0	0	17.9639	0.4713	12.4793	13.331	7.95079e-09	2.5473e-06	up
Unigene0017348	0	0	0	10.2994	17.496	1.4506	13.251	1.40762e-09	5.55052e-07	up
Unigene0037767	0	0	0	22.0103	3.2031	0	13.0369	2.56059e-07	4.4063e-05	up
Unigene0011492	0	0	0	11.4213	1.3769	10.1862	12.9034	1.35538e-14	3.13774e-11	up
Unigene0014474	0	0	0	9.4981	1.5511	11.3518	12.8663	3.39313e-11	2.45971e-08	up
Unigene0039792	0	0	0	11.1915	1.2467	9.6242	12.8443	1.23409e-10	7.56975e-08	up
Unigene0003194	0	0	0	20.0306	1.8894	0	12.835	9.08795e-06	0.00078298	up
Unigene0037275	0	0	0	20.2916	1.3361	0	12.8156	7.86631e-06	0.00069868	up
Unigene0004396	0	0	0	2.283	9.1806	9.7461	12.7875	9.68601e-10	4.08898e-07	up
Unigene0028050	0	0	0	18.9147	2.0371	0	12.7698	1.49558e-06	0.000180998	up
Unigene0034679	0	0	0	9.6276	0.1213	9.9589	12.6815	1.75929e-07	3.22084e-05	up
Unigene0020185	0	0	0	0	12.0944	7.609	12.6812	1.41456e-05	0.00108691	up
Unigene0039841	0	0	0	9.4757	0.8356	7.7935	12.5591	4.51845e-11	3.11799e-08	up
Unigene0065010	0	0	0	17.1043	0.9977	0	12.5589	4.2757e-05	0.00247827	up
Unigene0019698	0	0	0	12.416	5.4384	0	12.539	2.26453e-07	4.01275e-05	up
Unigene0024794	0	0	0	16.1152	1.682	0	12.5344	7.64484e-06	0.00068409	up
Unigene0051594	0	0	0	9.2956	0.6613	6.7136	12.44	7.79612e-08	1.65043e-05	up
Unigene0034712	0	0	0	9.628	4.037	2.3162	12.3791	5.59585e-12	5.37262e-09	up
Unigene0071970	0	0	0	12.9066	2.7381	0	12.3484	1.81606e-06	0.000213657	up
Unigene0058162	0	0	0	11.9283	3.1438	0.085	12.3027	6.04363e-07	8.69193e-05	up
Unigene0028416	0	0	0	7.725	0.5202	6.7985	12.2919	3.3097e-10	1.75944e-07	up
Unigene0007234	0	0	0	9.4026	5.5109	0	12.2794	1.57305e-05	0.00117351	up
Unigene0045788	0	0	0	0.7913	4.0473	9.9645	12.2686	4.17433e-08	1.01705e-05	up
Unigene0034393	0	0	0	14.5883	0.0355	0	12.2511	3.79939e-05	0.00227222	up
Unigene0059333	0	0	0	2.883	11.6407	0	12.2412	1.49981e-06	0.000181204	up
Unigene0050163	0	0	0	8.3106	6.1441	0	12.2343	8.24713e-05	0.00404014	up
Unigene0022630	0	0	0	8.2294	0.4929	5.3527	12.1959	3.75251e-07	5.91874e-05	up
Unigene0001019	0	0	0	0.067	10.2075	3.7326	12.1889	5.40017e-06	0.000528715	up
Unigene0005506	0	0	0	9.9735	4.0298	0	12.1885	5.07881e-05	0.00281456	up
Unigene0038181	0	0	0	0	12.0546	1.8968	12.1832	3.71513e-06	0.000388093	up
Unigene0003017	0	0	0	11.1029	2.5743	0	12.1545	2.28607e-05	0.00156101	up
Unigene0044460	0	0	0	4.153	4.9411	4.3655	12.1314	1.42125e-18	1.4571e-14	up
Unigene0021242	0	0	0	9.965	3.3645	0	12.1174	7.55886e-06	0.000678087	up
Unigene0044091	0	0	0	5.118	1.2895	6.867	12.1114	3.69517e-11	2.59988e-08	up
Unigene0006501	0	0	0	7.1872	0	5.9122	12.0923	1.02096e-05	0.000855959	up
Unigene0010245	0	0	0	10.2562	2.765	0	12.0836	5.17381e-06	0.000510032	up
Unigene0060936	0	0	0	9.8446	3.1753	0	12.0835	2.75306e-06	0.000303964	up
Unigene0046211	0	0	0	9.5579	3.3982	0	12.0764	3.76845e-06	0.00039252	up
Unigene0031027	0	0	0	7.837	0.8966	4.1153	12.0644	2.04972e-11	1.67159e-08	up
Unigene0023960	0	0	0	9.7227	3.0724	0	12.0583	2.94691e-05	0.00189505	up
Unigene0014448	0	0	0	10.1613	2.611	0	12.0558	3.21587e-06	0.000344978	up
Unigene0018528	0	0	0	0	7.1974	5.4696	12.0438	1.98669e-05	0.00141128	up
Unigene0011470	0	0	0	10.174	2.4377	0	12.0375	1.24723e-05	0.000994031	up
Unigene0072168	0	0	0	10.7588	1.7977	0	12.0312	1.66436e-05	0.00122382	up
Unigene0072225	0	0	0	8.4079	4.1464	0	12.0309	4.59976e-05	0.00260954	up
Unigene0026729	0	0	0	9.4655	3.0821	0	12.0302	1.01841e-05	0.000854825	up
Unigene0004514	0	0	0	0.2891	2.9375	9.285	12.026	5.57591e-07	8.13336e-05	up
Unigene0007462	0	0	0	6.7201	1.2291	4.4663	12.0149	1.089e-07	2.19531e-05	up
Unigene0000812	0	0	0	10.8381	1.5583	0	12.0127	3.95279e-05	0.00234443	up
Unigene0016255	0	0	0	8.3388	4.0527	0	12.0121	1.87426e-05	0.00134508	up
Unigene0070671	0	0	0	2.4519	8.9418	0.8729	11.9975	1.42298e-12	1.70202e-09	up
Unigene0038070	0	0	0	10.9369	1.277	0	11.9913	1.16231e-06	0.000146421	up
Unigene0053423	0	0	0	8.6889	1.0274	2.4756	11.9887	7.86125e-09	2.52991e-06	up
Unigene0007753	0	0	0	7.2951	0.2059	4.6852	11.988	1.29882e-05	0.00102317	up
Unigene0035347	0	0	0	11.0523	1.0113	0	11.9734	2.26171e-05	0.0015508	up
Unigene0026458	0	0	0	9.7375	2.2899	0	11.9691	7.38228e-06	0.000665574	up
Unigene0026229	0	0	0	11.6404	0.1438	0	11.9396	3.12746e-05	0.00196492	up
Unigene0039570	0	0	0	10.3671	1.3821	0	11.9353	0.000138138	0.00599011	up
Unigene0024552	0	0	0	8.6514	3.0017	0	11.9235	4.46997e-05	0.00255266	up
Unigene0040728	0	0	0	9.4178	2.1975	0	11.9188	3.40211e-06	0.000361374	up
Unigene0007094	0	0	0	8.6193	2.951	0	11.9132	4.88999e-06	0.00048606	up
Unigene0031600	0	0	0	9.8683	1.6422	0.0376	11.9104	3.86661e-06	0.000399843	up
Unigene0041838	0	0	0	6.4327	0.5716	4.3595	11.8872	2.12875e-08	5.92139e-06	up
Unigene0034405	0	0	0	7.7799	3.5628	0	11.8845	9.2532e-06	0.000794336	up
Unigene0070373	0	0	0	0.1513	7.6472	3.5376	11.8837	1.40215e-07	2.65505e-05	up
Unigene0014668	0	0	0	8.3286	2.9733	0	11.8793	3.96631e-06	0.000408387	up
Unigene0043256	0	0	0	5.8129	0.1883	5.21	11.8677	1.07135e-06	0.000138285	up
Unigene0055537	0	0	0	5.5821	0	5.4887	11.8495	4.82973e-05	0.00270156	up
Unigene0030409	0	0	0	8.7626	2.1232	0	11.8252	1.19106e-05	0.000956122	up
Unigene0004414	0	0	0	0.4517	3.7287	6.6556	11.8186	4.68746e-06	0.000468524	up
Unigene0016504	0	0	0	7.1524	3.6597	0	11.8154	6.82084e-05	0.00352669	up
Unigene0004018	0	0	0	7.8114	2.8567	0	11.7961	2.86137e-05	0.00184941	up
Unigene0008351	0	0	0	9.3618	1.2911	0	11.794	4.07235e-06	0.000415137	up
Unigene0064449	0	0	0	8.134	2.3524	0.0477	11.7778	2.48401e-07	4.2956e-05	up
Unigene0011342	0	0	0	7.3392	3.175	0	11.7751	1.28617e-05	0.00101767	up
Unigene0052020	0	0	0	7.6229	2.845	0	11.7687	5.18199e-06	0.000510138	up
Unigene0057979	0	0	0	3.3706	0.4553	6.6377	11.7681	1.22777e-06	0.000153773	up
Unigene0020750	0	0	0	5.4269	0.3407	4.5174	11.7433	2.71045e-10	1.47362e-07	up
Unigene0061530	0	0	0	7.31	2.7647	0	11.7135	2.51928e-06	0.000282057	up
Unigene0036091	0	0	0	5.4043	0.2471	4.3795	11.7072	2.05352e-08	5.75676e-06	up
Unigene0001099	0	0	0	8.6833	1.3328	0	11.7051	0.00010726	0.00494386	up
Unigene0046459	0	0	0	3.113	1.0224	5.8295	11.6977	1.83795e-08	5.29728e-06	up
Unigene0048776	0	0	0	0	4.291	5.6613	11.6959	0.000124042	0.0055499	up
Unigene0037918	0	0	0	0	9.3727	0.5782	11.6956	5.44414e-05	0.00297113	up
Unigene0037127	0	0	0	8.641	1.2759	0	11.6907	0.000116144	0.00527543	up
Unigene0000841	0	0	0	8.5034	1.3911	0	11.6874	2.31316e-05	0.00157352	up
Unigene0027741	0	0	0	6.9035	2.9851	0	11.6866	8.32447e-05	0.0040668	up
Unigene0037173	0	0	0	7.071	2.7541	0	11.6773	2.12649e-05	0.00147591	up
Unigene0021538	0	0	0	8.0482	1.772	0	11.6766	4.40032e-05	0.00252765	up
Unigene0048552	0	0	0	4.5009	0.5352	4.7763	11.6754	6.05909e-08	1.36741e-05	up
Unigene0046421	0	0	0	8.1626	1.6105	0	11.6696	0.000108882	0.00500579	up
Unigene0035682	0	0	0	6.5922	3.1541	0	11.6657	6.17568e-06	0.000587804	up
Unigene0056070	0	0	0	6.4337	3.3122	0	11.6656	3.3973e-05	0.00208921	up
Unigene0053964	0	0	0	7.1525	2.5697	0	11.6621	1.61033e-05	0.00119679	up
Unigene0025980	0	0	0	6.6922	0	3.0195	11.6605	2.73118e-06	0.000302012	up
Unigene0034978	0	0	0	6.9363	2.7526	0	11.6572	6.84169e-06	0.000631106	up
Unigene0030926	0	0	0	7.6467	1.9883	0	11.6491	2.04788e-05	0.00143014	up
Unigene0000367	0	0	0	8.1915	1.4328	0	11.6475	0.000118546	0.00535403	up
Unigene0028633	0	0	0	6.9913	2.5894	0	11.641	1.60259e-05	0.00119307	up
Unigene0039973	0	0	0	5.8352	0.1604	3.5787	11.64	1.26723e-05	0.00100602	up
Unigene0037189	0	0	0	3.3368	0.7645	5.4582	11.6378	7.74509e-10	3.49581e-07	up
Unigene0059021	0	0	0	6.8058	2.7461	0	11.6366	2.25641e-06	0.000257446	up
Unigene0012968	0	0	0	8.493	1.0138	0	11.6298	3.40396e-06	0.000361374	up
Unigene0000650	0	0	0	1.2075	3.5778	4.5616	11.6053	1.35017e-11	1.21121e-08	up
Unigene0015959	0	0	0	8.03	1.3073	0	11.6038	0.000102467	0.00477508	up
Unigene0053892	0	0	0	6.1752	0.7261	2.407	11.5993	8.92494e-06	0.00077356	up
Unigene0016536	0	0	0	5.9567	3.3019	0	11.5916	8.03544e-05	0.00395604	up
Unigene0031060	0	0	0	6.6982	0	2.5383	11.5882	1.50467e-05	0.00113667	up
Unigene0001148	0	0	0	6.856	2.3133	0	11.5776	3.09952e-05	0.00195252	up
Unigene0019959	0	0	0	7.0184	2.1469	0	11.577	4.57415e-05	0.00259911	up
Unigene0054415	0	0	0	6.2534	2.8643	0	11.5695	0.000237611	0.00889999	up
Unigene0063722	0	0	0	5.9707	3.1351	0	11.5676	1.84341e-05	0.00132826	up
Unigene0061970	0	0	0	6.4171	2.6806	0	11.5663	4.20895e-05	0.00245577	up
Unigene0029223	0	0	0	6.6182	2.4622	0	11.5636	3.45921e-05	0.0021146	up
Unigene0000240	0	0	0	2.2189	6.6991	0	11.5375	8.38892e-06	0.000731662	up
Unigene0019340	0	0	0	7.2328	1.6073	0	11.5249	0.000165345	0.00683535	up
Unigene0028955	0	0	0	7.3778	1.4414	0	11.5215	2.18212e-05	0.00150723	up
Unigene0060909	0	0	0	0.2929	3.5132	4.9799	11.516	3.23025e-05	0.00201234	up
Unigene0067194	0	0	0	5.9126	2.8547	0	11.513	1.04839e-05	0.000870815	up
Unigene0052489	0	0	0	7.4897	1.2352	0	11.506	0.000544213	0.0163209	up
Unigene0027908	0	0	0	7.2654	1.414	0	11.4984	3.16545e-05	0.0019823	up
Unigene0069222	0	0	0	3.0163	3.0146	2.6114	11.4922	1.98287e-07	3.57545e-05	up
Unigene0040746	0	0	0	3.9823	0	4.6342	11.4879	9.40339e-05	0.00449297	up
Unigene0031396	0	0	0	4.6712	0.2579	3.6829	11.4872	1.59565e-07	2.96666e-05	up
Unigene0032918	0	0	0	4.6451	0	3.9093	11.4775	2.03455e-05	0.00142678	up
Unigene0041825	0	0	0	7.1361	1.331	0	11.4627	7.65863e-06	0.00068447	up
Unigene0001181	0	0	0	7.9108	0.5472	0	11.4611	0.000155005	0.00650596	up
Unigene0069583	0	0	0	5.3987	0.3066	2.7111	11.454	5.75084e-09	1.956e-06	up
Unigene0026247	0	0	0	5.7304	2.6795	0	11.4529	9.89214e-05	0.00465216	up
Unigene0024640	0	0	0	2.0706	3.8583	2.4657	11.4503	6.81487e-10	3.17582e-07	up
Unigene0049677	0	0	0	5.6322	2.7577	0	11.4495	0.000214445	0.00823868	up
Unigene0000684	0	0	0	6.3172	2.0618	0	11.4476	7.74849e-05	0.00385353	up
Unigene0052621	0	0	0	7.1154	1.2085	0	11.4381	0.000452597	0.0143215	up
Unigene0042363	0	0	0	1.9188	2.3429	4.0427	11.4347	1.863e-07	3.38482e-05	up
Unigene0035072	0	0	0	0.197	8.0779	0	11.4296	5.03784e-05	0.00279618	up
Unigene0041836	0	0	0	4.3332	0.2492	3.6922	11.4295	5.82824e-07	8.41589e-05	up
Unigene0050549	0	0	0	0.2477	4.4557	3.5088	11.4186	0.00017536	0.0071424	up
Unigene0026061	0	0	0	5.7231	2.4847	0	11.4178	6.44327e-06	0.000606039	up
Unigene0003254	0	0	0	6.414	1.7883	0	11.4169	2.15831e-05	0.00149367	up
Unigene0064411	0	0	0	6.4288	1.7355	0	11.4102	0.000137548	0.00597534	up
Unigene0066773	0	0	0	6.1142	1.9692	0	11.3958	0.00013511	0.00589799	up
Unigene0057852	0	0	0	7.0599	0.9056	0	11.3746	3.6541e-05	0.00220185	up
Unigene0010334	0	0	0	6.1677	1.7265	0	11.3616	2.77449e-05	0.00180357	up
Unigene0021069	0	0	0	6.594	1.2793	0	11.3578	2.8439e-05	0.00184035	up
Unigene0068122	0	0	0	1.0615	4.0251	2.757	11.3523	3.38579e-06	0.000360511	up
Unigene0018017	0	0	0	1.0519	3.8591	2.9143	11.349	5.49159e-07	8.0358e-05	up
Unigene0015665	0	0	0	0.1835	1.6831	5.9509	11.3475	1.31762e-05	0.00103571	up
Unigene0030565	0	0	0	1.1311	3.0589	3.561	11.3352	3.30143e-05	0.0020425	up
Unigene0043481	0	0	0	6.2044	1.4423	0	11.3157	4.06651e-06	0.000415131	up
Unigene0039362	0	0	0	7.2712	0.2959	0	11.3006	7.67956e-05	0.00382996	up
Unigene0047581	0	0	0	3.8921	0.1872	3.4253	11.2886	5.76506e-05	0.00311079	up
Unigene0026248	0	0	0	5.0745	2.4297	0	11.2885	8.69907e-07	0.000117349	up
Unigene0048648	0	0	0	2.2291	1.8347	3.3919	11.2792	2.01997e-05	0.00142423	up
Unigene0013760	0	0	0	6.0312	1.4101	0	11.2764	0.000259116	0.0095141	up
Unigene0022774	0	0	0	6.4422	0.9595	0	11.2687	9.93301e-05	0.00466221	up
Unigene0027814	0	0	0	3.5701	0	3.8214	11.2667	0.000234191	0.00880406	up
Unigene0001954	0	0	0	5.4756	1.9096	0	11.2655	0.000141986	0.00612022	up
Unigene0010236	0	0	0	4.2047	2.2668	0.8991	11.2626	1.0145e-08	3.13821e-06	up
Unigene0016575	0	0	0	7.1167	0.2531	0	11.2624	8.25474e-05	0.004041	up
Unigene0005936	0	0	0	4.5589	0.1892	2.5961	11.2574	1.17769e-08	3.58127e-06	up
Unigene0016069	0	0	0	1.4802	3.1802	2.6688	11.2545	4.21482e-09	1.46126e-06	up
Unigene0034298	0	0	0	6.1441	1.0836	0	11.2344	6.60033e-05	0.00344996	up
Unigene0056690	0	0	0	5.3635	1.7973	0	11.2209	0.00055653	0.0165588	up
Unigene0016593	0	0	0	6.022	1.1246	0	11.2181	0.000192343	0.00761372	up
Unigene0027687	0	0	0	2.083	2.2962	2.7461	11.2138	1.62592e-09	6.17385e-07	up
Unigene0016721	0	0	0	6.1356	0.941	0	11.2039	9.10637e-05	0.0043685	up
Unigene0057870	0	0	0	4.7389	2.3283	0	11.202	0.000100031	0.00468898	up
Unigene0039101	0	0	0	0.2826	6.7787	0	11.2008	0.000288571	0.0103024	up
Unigene0052142	0	0	0	5.0774	1.9362	0	11.191	5.39733e-05	0.00295683	up
Unigene0006191	0	0	0	5.2036	1.6687	0	11.1616	0.000411995	0.013397	up
Unigene0057177	0	0	0	5.1862	1.6119	0.0685	11.1604	4.57251e-06	0.000458952	up
Unigene0010583	0	0	0	5.7679	1.0316	0	11.1463	6.81526e-05	0.00352669	up
Unigene0004070	0	0	0	2.04	2.2388	2.4263	11.1261	7.86549e-07	0.000107315	up
Unigene0065581	0	0	0	4.2853	2.4048	0	11.1228	0.000181657	0.0073222	up
Unigene0070670	0	0	0	1.3816	5.2391	0.0544	11.1196	6.82852e-05	0.00352785	up
Unigene0015150	0	0	0	0.8877	2.6302	3.1299	11.1137	4.93521e-07	7.36341e-05	up
Unigene0065000	0	0	0	4.8185	1.8265	0	11.1131	0.000314254	0.0109692	up
Unigene0034375	0	0	0	5.1499	1.4788	0	11.1095	1.15358e-05	0.000935452	up
Unigene0024975	0	0	0	0.1973	6.4032	0	11.1034	0.00107198	0.0266199	up
Unigene0068258	0	0	0	5.8501	0.7398	0	11.1011	7.29435e-05	0.00368912	up
Unigene0033629	0	0	0	5.5038	1.0494	0	11.093	0.000142231	0.00612687	up
Unigene0070884	0	0	0	5.7057	0.8141	0	11.0856	0.000406454	0.013283	up
Unigene0041032	0	0	0	3.6763	0.0734	2.7515	11.0815	2.166e-06	0.000249111	up
Unigene0022147	0	0	0	2.8548	0.7553	2.8888	11.081	2.32877e-07	4.09625e-05	up
Unigene0071619	0	0	0	0	3.9638	2.5156	11.0767	0.000482157	0.0150184	up
Unigene0034521	0	0	0	5.2195	1.242	0	11.0727	2.63477e-05	0.00174434	up
Unigene0037976	0	0	0	6.0127	0.432	0	11.0689	0.000127394	0.00567509	up
Unigene0008979	0	0	0	2.5282	0.7246	3.1588	11.0615	5.04532e-10	2.53204e-07	up
Unigene0036735	0	0	0	0	2.8023	3.5884	11.0568	0.000129097	0.00572963	up
Unigene0014680	0	0	0	6.0815	0.2592	0	11.0455	0.000253531	0.00935953	up
Unigene0008893	0	0	0	4.5613	1.7783	0	11.0452	0.000196463	0.00772992	up
Unigene0058769	0	0	0	4.9258	1.3748	0	11.0363	0.000170568	0.00701489	up
Unigene0003315	0	0	0	5.2873	0.9824	0	11.0292	8.38323e-05	0.00408717	up
Unigene0029832	0	0	0	5.9398	0.3259	0	11.0283	0.000271744	0.00984201	up
Unigene0024505	0	0	0	4.221	2.0392	0	11.027	1.75142e-05	0.00127736	up
Unigene0027067	0	0	0	5.5825	0.6095	0	11.0112	2.13898e-05	0.00148189	up
Unigene0018496	0	0	0	4.7508	1.414	0	11.0049	0.000510329	0.0155848	up
Unigene0038133	0	0	0	3.2277	0.1642	2.7553	11.0008	3.30994e-07	5.32604e-05	up
Unigene0003057	0	0	0	3.8812	1.7506	0.4807	10.9926	7.67526e-06	0.000685103	up
Unigene0003079	0	0	0	5.6336	0.3773	0	10.9684	0.00113402	0.0276628	up
Unigene0029303	0	0	0	4.2117	1.7952	0	10.9674	0.000208568	0.00809525	up
Unigene0006567	0	0	0	1.1621	1.7973	3.0394	10.9655	1.45278e-05	0.00111034	up
Unigene0013323	0	0	0	5.2097	0.7876	0	10.9651	0.00112834	0.0275637	up
Unigene0017418	0	0	0	4.0026	1.9845	0	10.9627	1.47828e-05	0.00112384	up
Unigene0056877	0	0	0	4.2493	1.7295	0	10.9607	0.00168984	0.0365632	up
Unigene0002347	0	0	0	5.249	0.6943	0	10.9521	0.00026563	0.00967773	up
Unigene0013752	0	0	0	0.5687	2.0633	3.2993	10.9492	1.54715e-07	2.88669e-05	up
Unigene0051858	0	0	0	4.4235	1.4925	0	10.9454	0.000332689	0.0114732	up
Unigene0071445	0	0	0	3.8876	1.9947	0	10.9372	0.000210983	0.00814491	up
Unigene0019242	0	0	0	4.7318	1.1428	0	10.9353	8.06967e-06	0.000713212	up
Unigene0051957	0	0	0	2.0017	1.1883	2.6744	10.9328	1.0653e-07	2.15359e-05	up
Unigene0001098	0	0	0	5.0391	0.81	0	10.929	0.000509032	0.015565	up
Unigene0009575	0	0	0	4.5224	1.3052	0	10.9237	0.00179428	0.0381536	up
Unigene0003847	0	0	0	3.1624	0	2.6549	10.9212	0.000784592	0.02128	up
Unigene0025973	0	0	0	0.2974	2.2814	3.2297	10.919	4.32072e-07	6.68277e-05	up
Unigene0018782	0	0	0	0	1.4301	4.3761	10.9184	0.00134518	0.0311615	up
Unigene0067783	0	0	0	4.1287	1.6733	0	10.9174	0.000944833	0.024338	up
Unigene0008073	0	0	0	0.6411	1.6282	3.5118	10.9122	6.04299e-06	0.000579341	up
Unigene0025774	0	0	0	0.56	3.1606	2.0275	10.9039	6.62515e-05	0.00346041	up
Unigene0057968	0	0	0	3.2462	1.1891	1.2971	10.9	6.13542e-08	1.37598e-05	up
Unigene0025734	0	0	0	1.1191	1.9947	2.559	10.8849	7.34012e-07	0.000101302	up
Unigene0029655	0	0	0	0.7316	2.2452	2.6948	10.8846	9.08157e-06	0.00078298	up
Unigene0009743	0	0	0	1.9868	0	3.6487	10.8754	0.00189119	0.0396504	up
Unigene0055070	0	0	0	4.4218	1.2102	0	10.8745	0.000783096	0.0212641	up
Unigene0031485	0	0	0	1.8069	2.1033	1.7066	10.8706	1.34483e-05	0.00105364	up
Unigene0061945	0	0	0	5.0111	0.5697	0	10.8613	0.000191153	0.00759176	up
Unigene0062247	0	0	0	5.0005	0.5699	0	10.8586	0.00136069	0.0314497	up
Unigene0015723	0	0	0	3.2494	0.355	1.9601	10.8571	3.1435e-09	1.10586e-06	up
Unigene0029831	0	0	0	5.3534	0.2044	0	10.8553	0.000134199	0.00586534	up
Unigene0071452	0	0	0	2.9998	0.3527	2.2036	10.8549	6.05448e-06	0.000579341	up
Unigene0032741	0	0	0	4.5829	0.9572	0	10.8507	0.000435374	0.0139114	up
Unigene0018434	0	0	0	0.2996	5.2304	0	10.8481	0.00181964	0.0385817	up
Unigene0065631	0	0	0	5.0127	0.5134	0	10.8471	0.00165325	0.0360509	up
Unigene0031761	0	0	0	0.6955	2.5761	2.2171	10.8373	3.62628e-05	0.00218692	up
Unigene0043482	0	0	0	4.6766	0.808	0	10.8362	0.000239564	0.00896377	up
Unigene0042150	0	0	0	3.0304	0.1815	2.2681	10.835	2.66121e-07	4.49375e-05	up
Unigene0022597	0	0	0	3.2521	1.6282	0.5945	10.8336	7.92438e-08	1.67265e-05	up
Unigene0010996	0	0	0	3.7114	0.099	1.6201	10.8219	2.20774e-06	0.0002531	up
Unigene0026049	0	0	0	0.4882	2.1527	2.7666	10.8158	4.52523e-05	0.00257542	up
Unigene0042610	0	0	0	0.9806	2.3637	2.0581	10.8144	6.93641e-07	9.68479e-05	up
Unigene0067373	0	0	0	1.5543	3.509	0.2936	10.8022	0.00039547	0.013016	up
Unigene0008081	0	0	0	0.1382	2.2916	2.9155	10.7991	1.05611e-05	0.000874197	up
Unigene0033544	0	0	0	1.6835	3.6343	0	10.7917	0.000508703	0.0155616	up
Unigene0061440	0	0	0	3.8563	1.4453	0	10.7872	0.000973252	0.0248829	up
Unigene0059521	0	0	0	0.2027	2.0913	2.9672	10.7762	1.15855e-05	0.000938422	up
Unigene0038839	0	0	0	4.2312	1.0234	0	10.7744	0.000494177	0.0152801	up
Unigene0001841	0	0	0	2.8686	0.0759	2.3029	10.7724	0.000204097	0.00796478	up
Unigene0064448	0	0	0	4.4124	0.8121	0	10.7661	0.000696866	0.0195586	up
Unigene0035361	0	0	0	3.1939	1.8199	0.1547	10.7506	0.000250219	0.00927064	up
Unigene0015585	0	0	0	1.2877	2.1415	1.7375	10.7501	3.01244e-05	0.00191829	up
Unigene0045568	0	0	0	3.5523	1.6039	0	10.7471	0.000163961	0.00678593	up
Unigene0015926	0	0	0	3.4248	1.2081	0.5134	10.7444	7.03219e-06	0.000642894	up
Unigene0005409	0	0	0	0.0891	3.205	1.8509	10.744	0.000553615	0.0164926	up
Unigene0018438	0	0	0	1.0655	1.7159	2.3627	10.7437	2.07247e-07	3.71832e-05	up
Unigene0034522	0	0	0	3.935	1.2089	0	10.7437	0.00055403	0.0164981	up
Unigene0009081	0	0	0	2.9662	0.9232	1.2359	10.7385	5.19114e-05	0.00286135	up
Unigene0028361	0	0	0	2.5387	0.7233	1.8444	10.7331	9.24074e-05	0.00442704	up
Unigene0054014	0	0	0	3.3983	1.6923	0	10.7287	0.000549195	0.0164302	up
Unigene0035541	0	0	0	2.6105	0.9669	1.4793	10.719	5.65705e-06	0.000549369	up
Unigene0037950	0	0	0	0.3028	4.6467	0.0953	10.7156	0.000205143	0.00800125	up
Unigene0018713	0	0	0	1.1502	2.1736	1.7071	10.7116	1.82214e-05	0.0013169	up
Unigene0062628	0	0	0	0.7085	0.6248	3.6802	10.7066	0.000786982	0.0213153	up
Unigene0014781	0	0	0	1.2917	1.8401	1.8769	10.7053	2.89658e-07	4.80083e-05	up
Unigene0033108	0	0	0	4.3495	0.6575	0	10.7048	0.00241348	0.0469266	up
Unigene0065505	0	0	0	1.5264	0.5101	2.9592	10.7015	6.26954e-05	0.00331325	up
Unigene0053230	0	0	0	4.7685	0.2132	0	10.6975	0.00203051	0.0417539	up
Unigene0044008	0	0	0	1.3416	1.9658	1.657	10.6924	4.22922e-07	6.58382e-05	up
Unigene0069621	0	0	0	3.1377	1.2829	0.5388	10.691	3.83707e-05	0.00228713	up
Unigene0002295	0	0	0	2.2881	0.4036	2.2639	10.6899	6.69735e-06	0.000620984	up
Unigene0038171	0	0	0	0.9142	2.2326	1.7933	10.6854	9.66545e-06	0.000821861	up
Unigene0017094	0	0	0	1.3975	1.9718	1.5398	10.6763	0.00015545	0.00651636	up
Unigene0004239	0	0	0	0.8296	3.863	0.1567	10.6586	0.000550753	0.0164483	up
Unigene0072035	0	0	0	4.2764	0.5028	0.0641	10.6568	3.43429e-05	0.00210654	up
Unigene0064205	0	0	0	3.9905	0.8446	0	10.6544	0.000150671	0.00639825	up
Unigene0015952	0	0	0	4.1603	0.6504	0	10.6471	0.000383477	0.012741	up
Unigene0071314	0	0	0	3.469	0	1.3403	10.6466	0.00125634	0.0296774	up
Unigene0026217	0	0	0	2.8339	0	1.9702	10.6451	9.42873e-05	0.00449409	up
Unigene0003583	0	0	0	2.4485	0.1364	2.1908	10.6365	0.000103149	0.00479754	up
Unigene0028360	0	0	0	3.1188	0	1.6495	10.6343	0.000532885	0.0160685	up
Unigene0041292	0	0	0	2.7095	0	2.0584	10.6342	0.000404923	0.0132451	up
Unigene0001671	0	0	0	0	1.4023	3.3594	10.6323	0.000830228	0.0220647	up
Unigene0024381	0	0	0	0.9945	0.8863	2.8674	10.6282	3.13142e-06	0.000336926	up
Unigene0062086	0	0	0	4.4342	0.3094	0	10.6268	0.000710439	0.0198078	up
Unigene0051719	0	0	0	0	1.4578	3.2527	10.6167	0.00247228	0.0475235	up
Unigene0018038	0	0	0	4.2533	0.4501	0	10.6145	8.78593e-05	0.00424659	up
Unigene0012196	0	0	0	2.8069	0.066	1.8066	10.6072	5.68367e-07	8.25697e-05	up
Unigene0017993	0	0	0	0.6987	1.4788	2.493	10.6044	4.12166e-05	0.00241663	up
Unigene0055291	0	0	0	4.1081	0.5373	0	10.5966	0.000445788	0.0141685	up
Unigene0003449	0	0	0	3.0787	0	1.5209	10.5823	0.000237416	0.00889999	up
Unigene0009167	0	0	0	3.1798	1.4111	0	10.5796	0.000323933	0.0112469	up
Unigene0019579	0	0	0	3.0258	1.5619	0	10.5786	0.00108429	0.0268568	up
Unigene0013223	0	0	0	4.5298	0.0527	0	10.577	0.00207509	0.042295	up
Unigene0022202	0	0	0	1.1717	1.4879	1.9182	10.5755	2.27443e-05	0.00155751	up
Unigene0002970	0	0	0	2.24	0	2.3171	10.5689	7.62045e-05	0.00381267	up
Unigene0057983	0	0	0	3.3849	0.7881	0.3836	10.5688	0.000106645	0.00492545	up
Unigene0005643	0	0	0	2.6246	0.303	1.6225	10.5667	8.09008e-06	0.000714136	up
Unigene0051640	0	0	0	3.9845	0.5622	0	10.5656	0.000240171	0.00897496	up
Unigene0003924	0	0	0	0.2212	0.8194	3.4999	10.5637	6.99324e-05	0.00359768	up
Unigene0065027	0	0	0	2.4007	1.3973	0.7369	10.5619	9.03241e-06	0.000780988	up
Unigene0053708	0	0	0	1.4236	1.7576	1.3445	10.559	0.000275597	0.00993894	up
Unigene0055405	0	0	0	2.3865	2.1336	0	10.5572	0.000132635	0.00582539	up
Unigene0034065	0	0	0	2.2489	0.1472	2.0802	10.5431	2.36979e-07	4.14806e-05	up
Unigene0017172	0	0	0	0	1.7955	2.6707	10.5399	0.000653628	0.018607	up
Unigene0068789	0	0	0	3.832	0.5703	0.0565	10.5375	0.000494465	0.0152824	up
Unigene0071088	0	0	0	1.154	2.0113	1.2822	10.5338	1.19782e-05	0.000960476	up
Unigene0059978	0	0	0	0.1391	4.3058	0	10.533	0.000541201	0.016251	up
Unigene0037566	0	0	0	1.7181	0.3135	2.4061	10.5306	2.62694e-07	4.47826e-05	up
Unigene0024648	0	0	0	2.5136	1.33	0.5935	10.5304	0.000963143	0.0246596	up
Unigene0027341	0	0	0	2.9928	0.273	1.1696	10.5299	2.43077e-05	0.00163646	up
Unigene0045014	0	0	0	0.8017	1.6025	2.0191	10.5259	9.50497e-05	0.00451147	up
Unigene0054943	0	0	0	3.3114	1.1066	0	10.5242	0.0006449	0.0184317	up
Unigene0070719	0	0	0	3.1332	1.2753	0	10.5211	0.00168994	0.0365632	up
Unigene0033630	0	0	0	3.357	1.0361	0	10.5161	0.00124137	0.0294021	up
Unigene0071963	0	0	0	2.3507	0.597	1.4209	10.508	0.000221269	0.00843763	up
Unigene0070944	0	0	0	1.5206	1.3992	1.4361	10.5038	8.13207e-06	0.000716961	up
Unigene0054227	0	0	0	3.4853	0.8652	0	10.502	0.000289178	0.0103096	up
Unigene0034146	0	0	0	3.0688	0.3936	0.8783	10.4987	0.000493981	0.0152801	up
Unigene0056280	0	0	0	0.4358	2.7673	1.132	10.4969	0.000811744	0.0217453	up
Unigene0015156	0	0	0	2.054	2.2605	0	10.49	0.00166026	0.036139	up
Unigene0051365	0	0	0	3.012	1.301	0	10.4895	0.000784119	0.0212753	up
Unigene0005907	0	0	0	0.9971	1.2986	1.9558	10.4688	3.89497e-05	0.00231205	up
Unigene0043016	0	0	0	2.6252	0.1221	1.4986	10.4669	1.94538e-08	5.56223e-06	up
Unigene0042350	0	0	0	3.5982	0.6346	0	10.4624	0.000647518	0.0184918	up
Unigene0025235	0	0	0	2.2299	1.5127	0.486	10.461	1.68009e-05	0.00123066	up
Unigene0020189	0	0	0	1.9797	1.4788	0.7699	10.4609	0.000541816	0.0162626	up
Unigene0008119	0	0	0	2.3957	0	1.8247	10.4582	0.000138249	0.00599129	up
Unigene0059711	0	0	0	0.558	1.3777	2.2835	10.4578	0.000240238	0.00897496	up
Unigene0034694	0	0	0	1.4798	0.1957	2.5331	10.4542	1.99534e-05	0.0014136	up
Unigene0067930	0	0	0	3.8229	0.3535	0	10.4431	0.000388685	0.0128545	up
Unigene0063028	0	0	0	1.2284	1.2999	1.6436	10.4415	0.000198695	0.00780489	up
Unigene0053339	0	0	0	3.39	0.7573	0	10.433	0.000231407	0.00872683	up
Unigene0002985	0	0	0	3.5997	0.5346	0	10.4285	0.00157991	0.0348872	up
Unigene0052201	0	0	0	0.6103	1.0979	2.4208	10.4266	2.63732e-05	0.00174442	up
Unigene0027545	0	0	0	3.1984	0.8885	0.0378	10.4251	9.90475e-05	0.00465504	up
Unigene0041837	0	0	0	3.1593	0	0.9591	10.4229	0.00077819	0.0211785	up
Unigene0062167	0	0	0	1.6748	1.3992	0.999	10.4069	0.000107405	0.00494739	up
Unigene0009873	0	0	0	2.064	0.546	1.462	10.4066	0.000479267	0.0149588	up
Unigene0016894	0	0	0	3.6749	0.3968	0	10.4065	0.000387459	0.0128258	up
Unigene0031562	0	0	0	2.3578	0	1.709	10.4047	0.000549684	0.0164307	up
Unigene0070276	0	0	0	3.726	0.3341	0	10.4023	0.00215592	0.0434123	up
Unigene0009770	0	0	0	1.3776	0.1388	2.5402	10.4011	0.000233715	0.00879539	up
Unigene0068867	0	0	0	0	1.6119	2.3977	10.3843	0.00241333	0.0469266	up
Unigene0052031	0	0	0	3.368	0.1533	0.4789	10.3809	3.18733e-05	0.00199426	up
Unigene0025083	0	0	0	0.1516	2.4861	1.3599	10.38	0.000449678	0.0142718	up
Unigene0014458	0	0	0	2.62	0.0956	1.2799	10.3792	0.00138674	0.0318466	up
Unigene0006832	0	0	0	1.0074	2.9851	0	10.3781	0.00141712	0.0322634	up
Unigene0057616	0	0	0	0.4836	1.791	1.7127	10.3762	0.0012167	0.0289435	up
Unigene0038942	0	0	0	1.1357	0.5656	2.2715	10.371	5.43852e-05	0.00297033	up
Unigene0061810	0	0	0	3.4392	0.5268	0	10.3685	0.00062156	0.0179432	up
Unigene0066663	0	0	0	1.4934	0	2.4497	10.3602	0.00196652	0.0408058	up
Unigene0003976	0	0	0	1.2807	1.5944	1.0672	10.3599	4.31811e-05	0.00249311	up
Unigene0062218	0	0	0	1.595	1.3362	1.0043	10.3574	1.97604e-05	0.00140826	up
Unigene0045281	0	0	0	0.5667	2.3987	0.9634	10.3549	0.00105787	0.0264037	up
Unigene0015694	0	0	0	1.141	1.8715	0.916	10.3548	9.88437e-06	0.000837499	up
Unigene0024847	0	0	0	1.4507	1.3049	1.1646	10.3517	3.36568e-05	0.0020751	up
Unigene0056147	0	0	0	1.5344	1.3285	1.0539	10.3505	2.78044e-05	0.0018045	up
Unigene0031243	0	0	0	2.5166	0.7476	0.6255	10.3405	6.58701e-06	0.000614725	up
Unigene0045857	0	0	0	2.1209	0.1679	1.5885	10.3359	5.28531e-13	7.09563e-10	up
Unigene0070168	0	0	0	2.1691	1.7003	0	10.3329	0.00222576	0.0443337	up
Unigene0006953	0	0	0	2.9065	0.9415	0	10.3249	0.00109403	0.0270087	up
Unigene0036607	0	0	0	1.6472	1.6406	0.5491	10.3208	0.000429715	0.0137674	up
Unigene0006695	0	0	0	2.6811	0.1773	0.9496	10.3099	0.000853825	0.0225527	up
Unigene0026051	0	0	0	1.1592	1.5948	1.0401	10.3046	1.05944e-05	0.000875944	up
Unigene0021784	0	0	0	1.6379	0.52	1.6243	10.3	0.000196157	0.00772633	up
Unigene0025084	0	0	0	0.3408	1.5025	1.931	10.297	4.52526e-05	0.00257542	up
Unigene0037878	0	0	0	1.506	0.2277	2.032	10.2937	0.000256515	0.00944055	up
Unigene0024958	0	0	0	1.6599	0.62	1.4755	10.2898	0.000421083	0.0136124	up
Unigene0068709	0	0	0	1.9528	0.3757	1.4252	10.2891	0.000438117	0.0139742	up
Unigene0029270	0	0	0	1.2264	1.3627	1.1583	10.2867	1.50398e-05	0.00113667	up
Unigene0002302	0	0	0	0.8844	2.8627	0	10.2866	0.000821143	0.0219056	up
Unigene0014233	0	0	0	1.3882	1.1752	1.18	10.2852	4.59084e-11	3.13777e-08	up
Unigene0033546	0	0	0	1.0257	2.7137	0	10.2836	0.00144192	0.0326565	up
Unigene0013552	0	0	0	1.2729	1.1973	1.269	10.2836	3.75454e-05	0.00224915	up
Unigene0055162	0	0	0	1.0005	1.0587	1.6536	10.2733	2.12521e-05	0.00147591	up
Unigene0013224	0	0	0	3.5335	0.1726	0	10.2707	0.00240572	0.04688	up
Unigene0028567	0	0	0	3.4895	0.2141	0	10.2698	0.00180371	0.0383087	up
Unigene0058277	0	0	0	1.4143	0.1497	2.1372	10.2688	0.000394278	0.0129976	up
Unigene0001980	0	0	0	2.6073	0.0968	0.9936	10.2674	0.000100915	0.00472117	up
Unigene0068780	0	0	0	1.1587	1.3377	1.1939	10.2646	0.000432933	0.0138519	up
Unigene0064116	0	0	0	0.9956	1.6681	1.0186	10.2614	0.000132849	0.00582786	up
Unigene0064457	0	0	0	1.8029	1.1344	0.7363	10.258	6.08839e-06	0.000581037	up
Unigene0072036	0	0	0	3.214	0.4586	0	10.2576	0.000406423	0.013283	up
Unigene0050947	0	0	0	0.2015	2.1322	1.3321	10.2549	0.00166182	0.036162	up
Unigene0025017	0	0	0	1.3491	0.9085	1.39	10.2478	0.000968811	0.0247782	up
Unigene0052012	0	0	0	2.5508	1.0926	0	10.2461	0.00128507	0.0301386	up
Unigene0015898	0	0	0	2.6932	0.2803	0.6672	10.245	3.70508e-05	0.00222138	up
Unigene0069189	0	0	0	2.1679	1.4489	0	10.2355	0.000965272	0.0246965	up
Unigene0006512	0	0	0	2.3079	0	1.3078	10.2351	0.000473931	0.014833	up
Unigene0057196	0	0	0	1.2942	2.1071	0.1881	10.2246	0.00178361	0.0379773	up
Unigene0054422	0	0	0	0.8679	1.2629	1.4345	10.2148	0.00067415	0.0190713	up
Unigene0069795	0	0	0	1.8438	1.0506	0.6698	10.2144	9.47067e-05	0.00449816	up
Unigene0045389	0	0	0	0.4574	1.6942	1.4041	10.211	0.0014048	0.0321069	up
Unigene0071570	0	0	0	0.4078	2.2658	0.8666	10.2047	0.00131176	0.0305848	up
Unigene0052843	0	0	0	1.5189	0.6889	1.3321	10.2045	0.000802062	0.0215539	up
Unigene0011105	0	0	0	1.2103	1.0567	1.2574	10.1982	6.3375e-08	1.39088e-05	up
Unigene0000893	0	0	0	1.8981	0.1674	1.4566	10.1973	2.01539e-05	0.00142359	up
Unigene0045569	0	0	0	2.6345	0.8871	0	10.1971	0.00149298	0.0335669	up
Unigene0010654	0	0	0	2.055	0.1856	1.2781	10.1959	9.25321e-07	0.000123876	up
Unigene0054130	0	0	0	1.4985	0.8395	1.1656	10.1897	0.000263401	0.00961998	up
Unigene0060095	0	0	0	1.7765	0.4245	1.299	10.1882	4.96318e-05	0.00276114	up
Unigene0025881	0	0	0	0.5959	1.7658	1.1257	10.183	0.0016339	0.0357822	up
Unigene0063299	0	0	0	0.4501	2.0959	0.9353	10.1804	0.000694215	0.0195071	up
Unigene0024506	0	0	0	2.0873	1.3869	0	10.1775	0.000631784	0.0181726	up
Unigene0025889	0	0	0	0.7052	1.4925	1.2655	10.1729	8.31958e-05	0.0040668	up
Unigene0064436	0	0	0	2.0406	0	1.4171	10.1706	0.00127439	0.0299468	up
Unigene0006739	0	0	0	0.1763	1.7724	1.4986	10.1663	0.00116592	0.028116	up
Unigene0033744	0	0	0	0.4582	1.1638	1.8178	10.1631	0.000592816	0.0173084	up
Unigene0071129	0	0	0	1.7462	0.7818	0.888	10.1531	8.10379e-05	0.00398195	up
Unigene0052879	0	0	0	0.7578	1.4034	1.2525	10.1522	0.000441083	0.01405	up
Unigene0020334	0	0	0	2.0584	0	1.3459	10.1482	0.00090582	0.023596	up
Unigene0070164	0	0	0	2.3311	0.0338	1.0254	10.1422	5.95079e-05	0.00317756	up
Unigene0058621	0	0	0	0.7407	0.9264	1.7172	10.1397	8.24736e-05	0.00404014	up
Unigene0002695	0	0	0	2.9325	0.4433	0	10.1361	0.000816441	0.0218304	up
Unigene0046716	0	0	0	0.357	0	2.9971	10.1267	0.000805938	0.0216301	up
Unigene0022304	0	0	0	2.0071	0	1.3321	10.1203	0.00102009	0.0257411	up
Unigene0031242	0	0	0	1.4262	0.7546	1.145	10.1145	0.000102585	0.0047775	up
Unigene0036992	0	0	0	1.7352	0.2623	1.3266	10.1138	1.03893e-07	2.10967e-05	up
Unigene0065701	0	0	0	2.0499	1.1681	0.0745	10.1	0.00176863	0.0378549	up
Unigene0066841	0	0	0	1.0951	0.9482	1.2224	10.0882	0.000616112	0.0178218	up
Unigene0059868	0	0	0	0.8462	2.0149	0.3996	10.086	0.00211412	0.0428132	up
Unigene0001429	0	0	0	1.265	0.0462	1.9363	10.0802	0.000199469	0.00781817	up
Unigene0064159	0	0	0	0.4128	1.7473	1.0721	10.0733	0.00151364	0.0338683	up
Unigene0067714	0	0	0	0.6142	1.7333	0.8701	10.0668	0.00117214	0.0282028	up
Unigene0052592	0	0	0	2.5439	0.6593	0	10.0603	0.00142056	0.0323132	up
Unigene0009979	0	0	0	2.4307	0	0.7652	10.057	0.00144894	0.0327749	up
Unigene0058308	0	0	0	1.5554	0.1176	1.5215	10.0564	0.000272212	0.00985153	up
Unigene0018144	0	0	0	0.9723	1.6005	0.6122	10.0521	0.00150186	0.0336621	up
Unigene0032528	0	0	0	1.281	0.2465	1.6498	10.0486	2.22313e-06	0.000254052	up
Unigene0032285	0	0	0	1.141	0.3622	1.6703	10.0469	8.80497e-05	0.00425234	up
Unigene0044275	0	0	0	1.8637	0.1599	1.1418	10.0432	0.000137964	0.00598616	up
Unigene0068824	0	0	0	2.2318	0.492	0.4391	10.0421	0.0018125	0.0384498	up
Unigene0015100	0	0	0	0.4637	1.5948	1.0948	10.0377	0.00246655	0.0475206	up
Unigene0009183	0	0	0	2.1304	0	1.006	10.0299	0.000721623	0.0200729	up
Unigene0053503	0	0	0	1.9874	0.5427	0.6055	10.0296	0.000194083	0.0076657	up
Unigene0017007	0	0	0	1.1684	1.4613	0.5016	10.0276	0.00161754	0.0355216	up
Unigene0008314	0	0	0	1.669	0.4648	0.9956	10.0267	0.000722504	0.020074	up
Unigene0023624	0	0	0	0.8566	1.2361	1.0297	10.0235	0.000210618	0.00813519	up
Unigene0071089	0	0	0	0.5574	1.5551	1.005	10.0212	2.74292e-05	0.00179279	up
Unigene0030006	0	0	0	0.767	0.974	1.3763	10.0211	0.00022963	0.0086735	up
Unigene0035613	0	0	0	1.8224	0.3588	0.9207	10.014	2.13923e-05	0.00148189	up
Unigene0064797	0	0	0	0.3951	1.6726	1.0263	10.0103	0.00151402	0.0338683	up
Unigene0015704	0	0	0	1.5867	0.5597	0.9366	10.0052	0.000147172	0.00628482	up
Unigene0019568	0	0	0	2.1363	0.9463	0	10.005	0.0011385	0.027736	up
Unigene0051929	0	0	0	0.8688	1.0215	1.1852	10.0016	0.000734585	0.0203075	up
Unigene0066674	0	0	0	1.1107	1.5112	0.4496	9.99977	0.00049753	0.0153375	up
Unigene0044968	0	0	0	1.8423	0.1477	1.0809	9.99948	4.13112e-08	1.01186e-05	up
Unigene0000365	0	0	0	1.2589	1.1101	0.6936	9.99558	0.00122823	0.0291486	up
Unigene0053952	0	0	0	1.3566	0.5127	1.1897	9.99388	0.00107625	0.0266911	up
Unigene0003263	0	0	0	1.8339	0	1.2226	9.9927	0.000341184	0.0116931	up
Unigene0064637	0	0	0	1.0757	1.366	0.6096	9.99025	0.00160461	0.0352968	up
Unigene0051181	0	0	0	1.5367	0.5854	0.9289	9.9901	9.91555e-05	0.00465706	up
Unigene0024783	0	0	0	2.2772	0.4463	0.3186	9.98589	0.00182944	0.03871	up
Unigene0066732	0	0	0	1.1734	1.3546	0.5037	9.98095	0.00183152	0.0387389	up
Unigene0051034	0	0	0	1.4507	0.8955	0.6851	9.98076	0.00257744	0.0487926	up
Unigene0037397	0	0	0	1.3156	0.1547	1.5187	9.96048	0.000136349	0.00593764	up
Unigene0031188	0	0	0	0.8585	1.4276	0.695	9.95667	9.4431e-05	0.00449409	up
Unigene0057921	0.028	0	0	20.3054	7.5062	0	9.95604	4.25587e-07	6.59669e-05	up
Unigene0057691	0	0	0	1.3403	1.3349	0.2979	9.95279	0.000735886	0.0203302	up
Unigene0065268	0	0	0	0.7772	1.2793	0.8971	9.9433	0.000506081	0.0155012	up
Unigene0015854	0	0	0	1.7753	0	1.1737	9.94105	0.00206354	0.0420835	up
Unigene0058749	0	0	0	0.7412	0.9805	1.2251	9.93997	0.000791016	0.0213816	up
Unigene0053019	0	0	0	0.6192	1.1467	1.1696	9.93443	0.000338541	0.0116248	up
Unigene0061363	0	0	0	1.6266	0.0675	1.235	9.93128	4.22406e-05	0.00245766	up
Unigene0072134	0	0	0	1.904	0.5495	0.4359	9.91159	0.000208546	0.00809525	up
Unigene0026661	0	0	0	1.398	0	1.4788	9.90529	0.00174406	0.0374295	up
Unigene0029083	0	0	0	1.6637	0.3912	0.8148	9.90172	0.000226525	0.00859238	up
Unigene0017257	0	0	0	1.4701	0	1.3884	9.89608	0.0018616	0.039214	up
Unigene0001058	0	0	0	1.3876	0	1.4561	9.88859	0.00140725	0.0321326	up
Unigene0022549	0	0	0	0.5495	1.0467	1.2456	9.88763	0.00227269	0.0449935	up
Unigene0071009	0	0	0	1.1445	1.101	0.5896	9.88422	0.00179075	0.0380897	up
Unigene0053768	0	0	0	0.9403	0.995	0.888	9.8782	0.00146479	0.0330781	up
Unigene0052327	0	0	0	0.6945	1.1432	0.9474	9.85855	0.000409424	0.0133558	up
Unigene0055643	0	0	0	1.4507	0.3411	0.9895	9.85658	0.000959161	0.0246103	up
Unigene0045015	0	0	0	0.4901	0.6224	1.6664	9.85534	0.00237077	0.0464105	up
Unigene0057693	0	0	0	1.4975	0.1509	1.0776	9.82761	0.00123858	0.0293456	up
Unigene0009960	0	0	0	1.73	0.3661	0.6127	9.81848	5.7798e-05	0.0031164	up
Unigene0003721	0	0	0	1.6505	0.1663	0.8908	9.81784	0.0018425	0.0389253	up
Unigene0028227	0	0	0	2.0154	0	0.6679	9.80483	0.000644493	0.0184317	up
Unigene0043189	0	0	0	1.5976	0	1.0845	9.80418	0.000147578	0.00629673	up
Unigene0054434	0	0	0	1.1445	0.4404	1.0809	9.79539	0.00252699	0.0481045	up
Unigene0033502	0	0	0	1.281	0.0616	1.3198	9.79355	0.0010497	0.0262301	up
Unigene0032154	0	0	0	1.7298	0.1077	0.8169	9.78921	0.000449836	0.0142718	up
Unigene0037573	0	0	0	1.1333	0	1.4986	9.77693	0.00255565	0.0484567	up
Unigene0029921	0	0	0	1.2626	0	1.3628	9.77336	0.00117138	0.0282004	up
Unigene0067058	0	0	0	0.7933	1.0794	0.7493	9.77149	0.00260635	0.0491841	up
Unigene0055126	0	0	0	0.6045	0.1599	1.8554	9.77028	0.00225443	0.0447309	up
Unigene0001736	0	0	0	1.6136	0.3415	0.6604	9.76791	0.000226033	0.00857824	up
Unigene0035247	0	0	0	1.292	0.0684	1.2507	9.76548	7.25312e-05	0.00367715	up
Unigene0031172	0	0	0	1.2632	0	1.347	9.76498	0.000876303	0.0229857	up
Unigene0029734	0	0	0	1.8114	0.0295	0.7633	9.76166	9.70499e-05	0.00459122	up
Unigene0056324	0	0	0	1.4153	0.9361	0.2506	9.76044	0.002586	0.0489287	up
Unigene0031890	0	0	0	1.4934	0.1437	0.9616	9.75861	0.00126568	0.0298497	up
Unigene0044727	0	0	0	0.7003	1.297	0.5788	9.74601	0.00141688	0.0322634	up
Unigene0052784	0	0	0	0.7277	0.8556	0.9927	9.74595	0.000734324	0.0203075	up
Unigene0071104	0	0	0	1.0155	0.6838	0.8719	9.74326	0.00132391	0.0307664	up
Unigene0040494	0	0	0	1.0437	0.1791	1.3321	9.73409	9.22424e-06	0.000792798	up
Unigene0015702	0	0	0	1.2218	0.3592	0.9616	9.72713	0.000583157	0.0171029	up
Unigene0067521	0	0	0	1.2899	0.0581	1.1924	9.72588	4.06734e-05	0.00239456	up
Unigene0024197	0	0	0	1.0741	0.7233	0.7378	9.72292	0.00188792	0.039605	up
Unigene0019807	0	0	0	1.6013	0	0.9222	9.71625	0.000892108	0.0233235	up
Unigene0070115	0	0	0	1.1808	0.6248	0.7169	9.71568	0.00108086	0.0267848	up
Unigene0001570	0	0	0	1.5768	0.3337	0.5957	9.70632	0.00176995	0.0378718	up
Unigene0030333	0	0	0	1.5403	0.1207	0.8082	9.68487	0.000849546	0.0224562	up
Unigene0015950	0	0	0	1.0371	0.1909	1.2351	9.6813	0.000152573	0.00644473	up
Unigene0040118	0	0	0	1.107	0.2343	1.1152	9.67743	0.00132529	0.0307801	up
Unigene0028983	0	0	0	0.273	1.0833	1.0957	9.67478	0.000855081	0.0225688	up
Unigene0015235	0	0	0	1.6417	0	0.7942	9.66528	0.00116507	0.0281146	up
Unigene0030298	0	0	0	1.1639	0.3079	0.9618	9.66391	0.0010342	0.0260057	up
Unigene0020172	0	0	0	1.437	0	0.9953	9.66314	0.00191267	0.0400073	up
Unigene0045633	0	0	0	1.3391	0.1996	0.8907	9.66142	6.06688e-07	8.70792e-05	up
Unigene0025203	0	0	0	1.0155	0.9979	0.411	9.65845	0.000787078	0.0213153	up
Unigene0026457	0	0	0	0.6809	0.7205	1.0105	9.65099	0.00220667	0.0440878	up
Unigene0041218	0	0	0	1.5268	0	0.8765	9.64584	0.000450215	0.0142776	up
Unigene0017698	0	0	0	0.8768	0.1687	1.3551	9.64422	0.000110017	0.00504826	up
Unigene0024034	0	0	0	1.0324	0.3476	1.0194	9.6435	9.64767e-05	0.00456711	up
Unigene0057381	0	0	0	1.3035	0.2627	0.8207	9.63596	0.000687965	0.0193618	up
Unigene0038677	0	0	0	1.0505	0.0926	1.2402	9.63378	0.000321786	0.0111832	up
Unigene0028071	0	0	0	2.0416	0	0.3353	9.6299	0.00263862	0.0495455	up
Unigene0023819	0	0	0	0.7693	0.148	1.4532	9.62601	0.00204846	0.041919	up
Unigene0060979	0	0	0	0.6631	0.7017	0.9841	9.61281	0.00220598	0.0440878	up
Unigene0002459	0	0	0	1.4861	0.2621	0.5848	9.60301	0.000122726	0.00552199	up
Unigene0027650	0	0	0	1.5699	0	0.7625	9.60264	0.0019333	0.0402978	up
Unigene0063661	0	0	0	1.0505	0.1235	1.1575	9.60208	0.000991877	0.0252422	up
Unigene0027263	0	0	0	1.1238	0	1.2061	9.60109	0.00255469	0.0484519	up
Unigene0018280	0	0	0	1.802	0.2243	0.3003	9.59904	0.000954544	0.0245182	up
Unigene0028843	0	0	0	1.4507	0	0.8677	9.59395	0.00229248	0.0452481	up
Unigene0006132	0	0	0	1.2089	0.2924	0.8155	9.59296	2.58075e-05	0.00171174	up
Unigene0072167	0	0	0	0.9995	0.4231	0.881	9.58471	0.000622517	0.0179636	up
Unigene0023499	0	0	0	0.8685	0.8484	0.5679	9.57289	0.0004931	0.0152797	up
Unigene0003095	0	0	0	0.9956	0.602	0.6716	9.56301	0.000802729	0.0215601	up
Unigene0038186	0	0	0	1.4141	0.2138	0.636	9.55963	5.104e-05	0.00282307	up
Unigene0037178	0	0	0	1.1702	0.344	0.7368	9.55139	1.62695e-05	0.00120495	up
Unigene0033631	0	0	0	1.2909	0.0911	0.8534	9.54135	0.000427457	0.0137368	up
Unigene0010111	0	0	0	1.2495	0.1803	0.8046	9.54071	2.03082e-05	0.00142678	up
Unigene0026276	0	0	0	1.5386	0.1085	0.5813	9.53683	0.000975977	0.0249373	up
Unigene0043384	0	0	0	0.7151	0.6622	0.8443	9.53242	0.00209238	0.0424905	up
Unigene0056394	0	0	0	0.5642	1.1194	0.5328	9.52904	0.000996085	0.0253134	up
Unigene0017737	0	0	0	0.7906	0.8366	0.5808	9.52356	0.00216557	0.0435823	up
Unigene0035074	0	0	0	1.5394	0.1068	0.5482	9.51465	3.55766e-05	0.00216505	up
Unigene0040327	0	0	0	1.2394	0.0846	0.8685	9.5134	0.000331928	0.0114635	up
Unigene0023247	0	0	0	1.0646	0.3467	0.7735	9.50832	0.00231105	0.045527	up
Unigene0067123	0	0	0	0.7852	0.277	1.1123	9.50151	2.72052e-05	0.00178465	up
Unigene0070930	0	0	0	1.1994	0.2115	0.7552	9.49592	0.00159066	0.0350492	up
Unigene0011301	0	0	0	1.1186	0.3088	0.7349	9.49339	0.000237605	0.00889999	up
Unigene0034287	0	0	0	1.275	0	0.8854	9.49212	0.00127421	0.0299468	up
Unigene0069713	0	0	0	1.4638	0	0.6912	9.48851	0.0026215	0.0493792	up
Unigene0026762	0	0	0	1.3975	0.3081	0.4399	9.48214	0.000922655	0.023939	up
Unigene0035445	0	0	0	1.0503	0.3176	0.7652	9.47377	1.38673e-05	0.00107011	up
Unigene0056548	0	0	0	1.3239	0	0.809	9.47364	0.00149648	0.0336243	up
Unigene0015724	0	0	0	0.617	0.9328	0.5828	9.47344	0.0022825	0.0451506	up
Unigene0071255	0	0	0	1.5115	0	0.6165	9.47032	0.00116133	0.0280525	up
Unigene0031945	0	0	0	1.419	0.0653	0.6409	9.46842	0.000172922	0.00706715	up
Unigene0002874	0	0	0	1.4248	0.0457	0.6524	9.46686	0.000945874	0.0243478	up
Unigene0033907	0	0	0	1.4203	0.2505	0.4471	9.46346	0.00123704	0.0293286	up
Unigene0008808	0	0	0	0.8945	0	1.2069	9.45217	0.00203829	0.0418421	up
Unigene0019630	0	0	0	0.4664	1.1282	0.5035	9.44991	0.00111875	0.0274866	up
Unigene0003199	0	0	0	0.9548	0.2377	0.9018	9.44729	1.38978e-05	0.00107131	up
Unigene0030832	0	0	0	0.7485	0.264	1.0604	9.43247	0.00106693	0.0265588	up
Unigene0030191	0	0	0	0.7091	0.1001	1.2502	9.42305	0.000822575	0.0219127	up
Unigene0068300	0	0	0	1.0194	0.2055	0.8252	9.41652	0.000428031	0.013738	up
Unigene0034288	0	0	0	1.7231	0	0.3255	9.41546	0.00247266	0.0475235	up
Unigene0059387	0	0	0	1.1598	0.1364	0.7303	9.39981	0.00245339	0.0473434	up
Unigene0037018	0	0	0	1.2999	0	0.7222	9.39668	0.00173913	0.0373348	up
Unigene0000169	0	0	0	0.8641	0.1261	1.0131	9.3832	6.68468e-05	0.00347884	up
Unigene0020694	0	0	0	0.9433	0.1426	0.9163	9.38241	3.19992e-05	0.00199783	up
Unigene0024843	0	0	0	1.3497	0.2721	0.3642	9.37069	0.00219744	0.0440016	up
Unigene0063071	0	0	0	0.609	0	1.366	9.36267	0.00197591	0.0409127	up
Unigene0015829	0	0	0	0.7034	0.5414	0.7247	9.35865	0.000767813	0.020963	up
Unigene0069526	0	0	0	1.2817	0.0174	0.6673	9.35638	3.48761e-05	0.00212833	up
Unigene0039252	0	0	0	1.0155	0.2579	0.6905	9.35454	0.000169908	0.00699575	up
Unigene0062972	0	0	0	1.2563	0.1108	0.5932	9.3519	0.0015454	0.0343579	up
Unigene0020871	0	0	0	1.1283	0.1628	0.6297	9.32253	0.0010476	0.0261867	up
Unigene0057839	0	0	0	1.3693	0.1739	0.3621	9.31084	7.17946e-05	0.0036497	up
Unigene0018433	0	0	0	0.4681	0.0762	1.3604	9.31039	0.000517855	0.0157476	up
Unigene0002626	0	0	0	1.1492	0.1106	0.6414	9.30773	0.00161152	0.0354218	up
Unigene0014702	0	0	0	1.095	0	0.8043	9.30629	0.00240577	0.04688	up
Unigene0003520	0	0	0	1.0362	0.3655	0.4893	9.29997	0.00100174	0.025388	up
Unigene0031716	0	0	0	0.7511	0.4769	0.6384	9.28108	0.00221983	0.044277	up
Unigene0038082	0	0	0	0.9265	0.1121	0.8251	9.27899	5.49635e-05	0.00299507	up
Unigene0018451	0	0	0	1.175	0.1309	0.5549	9.27674	0.000128529	0.00570792	up
Unigene0007323	0	0	0	1.0649	0.2254	0.5632	9.27107	0.00035312	0.0119877	up
Unigene0039680	0	0	0	0.7032	0.0744	1.0627	9.26076	0.000394057	0.0129963	up
Unigene0072111	0	0	0	0.6939	0.0864	1.0408	9.24563	0.000721995	0.020074	up
Unigene0011166	0	0	0	0.9438	0.1997	0.6685	9.2384	0.000664894	0.0188604	up
Unigene0056802	0	0	0	1.0054	0.0887	0.7122	9.23386	0.000847322	0.0224056	up
Unigene0032845	0	0	0.1134	37.6503	1.5482	28.8538	9.22908	4.53539e-12	4.58432e-09	up
Unigene0006811	0	0	0	1.0902	0.1648	0.5394	9.22432	4.17472e-05	0.00243977	up
Unigene0021929	0	0	0	0.9531	0.1834	0.6547	9.22175	0.000491554	0.0152515	up
Unigene0069809	0	0	0	1.215	0	0.5738	9.21981	0.00150109	0.0336621	up
Unigene0005731	0	0	0	1.2357	0.0594	0.4774	9.20661	0.000259549	0.00952289	up
Unigene0040069	0.0677	0	0.0338	0.0769	37.2484	22.5012	9.20316	2.26655e-08	6.13817e-06	up
Unigene0023840	0	0	0	0.7215	0.6203	0.4259	9.2027	0.000262078	0.00958142	up
Unigene0055573	0	0	0	1.0477	0.1706	0.5328	9.18908	0.000455018	0.0143791	up
Unigene0017921	0	0	0	0.6947	0.2005	0.835	9.17176	9.03434e-05	0.00434266	up
Unigene0017415	0	0	0	1.1798	0.0462	0.4952	9.16424	0.00208168	0.0423867	up
Unigene0071092	0	0	0	0.4454	0.22	1.0376	9.1489	8.61962e-05	0.00417688	up
Unigene0016229	0	0	0	0.9438	0.2996	0.4457	9.13708	0.000684513	0.0192959	up
Unigene0033457	0	0	0	0.6396	0.2083	0.8364	9.13297	0.000937019	0.0242154	up
Unigene0030836	0	0	0	0.3544	0.1875	1.1298	9.12214	0.000994901	0.0252923	up
Unigene0050065	0	0.0205	0	10.4402	0.9759	0	9.12123	8.83288e-06	0.000766506	up
Unigene0021980	0	0	0	0.58	0.2833	0.8006	9.11539	0.000497805	0.0153394	up
Unigene0001520	0	0	0	0.6994	0	0.9578	9.10957	0.00236952	0.0463987	up
Unigene0028676	0	0	0	1.0102	0.093	0.5393	9.09672	0.00147945	0.0333252	up
Unigene0026796	0	0	0	0.716	0.1894	0.7326	9.09276	8.90436e-05	0.004292	up
Unigene0001065	0	0	0	0.9946	0	0.6341	9.08454	0.000861844	0.0226942	up
Unigene0026605	0	0	0	1.0338	0	0.5903	9.08046	0.000791395	0.0213838	up
Unigene0011531	0	0	0	0.9195	0.0846	0.6041	9.06627	0.0010385	0.0260627	up
Unigene0067938	0	0	0	0.6136	0.0812	0.9055	9.05916	0.000934795	0.024184	up
Unigene0010451	0	0	0	0.9171	0.3529	0.315	9.0453	0.000531912	0.0160526	up
Unigene0000590	0	0	0	0.786	0.1663	0.631	9.04376	0.000524886	0.0159075	up
Unigene0025840	0	0	0	1.1808	0	0.4015	9.04284	0.00095425	0.0245182	up
Unigene0064760	0	0	0	0.493	0.1043	0.9777	9.03617	0.00233864	0.0459192	up
Unigene0055185	0	0	0	0.9956	0.1405	0.4388	9.03608	0.000366099	0.0122659	up
Unigene0000203	0	0	0	0.8312	0.11	0.6215	9.02486	0.000483546	0.0150421	up
Unigene0047293	0.0937	0	0.0934	52.7596	3.2269	41.0558	9.01866	5.26642e-15	1.39981e-11	up
Unigene0043228	0	0	0	0.5958	0.0701	0.844	8.97527	0.000652868	0.0185973	up
Unigene0025591	0	0	0	0.5345	0.3232	0.649	8.97221	0.000288976	0.0103075	up
Unigene0036035	0	0	0	0.6167	0.145	0.7442	8.97145	0.000386809	0.012822	up
Unigene0059879	0	0	0	0.8987	0	0.6062	8.97049	0.00243571	0.0471417	up
Unigene0029868	0	0	0	0.8635	0	0.6253	8.95497	0.00177747	0.0379537	up
Unigene0064292	0	0	0	0.8679	0.0383	0.5806	8.95303	0.00152814	0.0340586	up
Unigene0034289	0	0	0	0.7485	0	0.7364	8.95119	0.00231635	0.0455563	up
Unigene0067000	0	0	0	0.6877	0.3639	0.433	8.9509	0.00208455	0.0424059	up
Unigene0023898	0	0	0	1.0505	0.0371	0.3969	8.9508	0.00167017	0.036289	up
Unigene0036204	0	0	0	0.8565	0.0465	0.5808	8.95012	0.000156446	0.00654282	up
Unigene0031830	0	0	0	0.8379	0.1773	0.4352	8.91727	0.00105984	0.0264189	up
Unigene0022488	0	0	0	0.8606	0.2024	0.3612	8.89097	0.00194213	0.0404348	up
Unigene0025543	0	0	0	1.2304	0	0.1897	8.88681	0.00238678	0.0466348	up
Unigene0033462	0	0	0	0.2695	0.5704	0.56	8.86615	0.0022447	0.0445747	up
Unigene0031404	0	0	0	0.5323	0.26	0.5801	8.83752	0.000702313	0.0196576	up
Unigene0055505	0	0	0	0.8626	0.0415	0.4629	8.83184	0.000151215	0.00641205	up
Unigene0027418	0	0	0.1349	7.524	35.7484	17.4511	8.81422	5.77469e-17	2.4378e-13	up
Unigene0002260	0	0.0139	0.0155	11.4324	1.2098	0	8.74822	5.51051e-06	0.000537183	up
Unigene0027221	0	0	0	0.8369	0.1476	0.1976	8.62217	0.00186591	0.0392925	up
Unigene0047400	0.0676	0	0.0674	31.0172	1.2187	20.279	8.60362	1.57359e-12	1.82146e-09	up
Unigene0017571	0	0	0	0.6719	0.0889	0.3966	8.59171	0.000169873	0.00699575	up
Unigene0039242	0	0	0.113	0.0858	20.376	22.276	8.56305	1.37597e-07	2.61952e-05	up
Unigene0022994	0	0	0	0.3018	0.1996	0.4988	8.38111	0.00205598	0.0420439	up
Unigene0060927	0.0533	0	0	11.8164	5.2707	0	8.32456	4.01095e-06	0.000412393	up
Unigene0061696	0	0.2986	0	50.6894	37.4325	0	8.20514	5.3927e-06	0.000528705	up
Unigene0045303	0	0	0	0.2627	0.3128	0.2481	8.10084	0.00208195	0.0423867	up
Unigene0002114	0.0506	0	0	7.6965	0.4863	5.3524	8.06336	5.168e-10	2.55784e-07	up
Unigene0066836	0	0	0	0.4072	0.0507	0.3167	8.01235	0.00209687	0.0425577	up
Unigene0068213	0	0	0.3264	18.5759	37.0874	26.4333	7.97454	7.52113e-16	2.34679e-12	up
Unigene0048282	0	0	0.149	0	23.5746	13.4571	7.9573	6.85106e-06	0.00063116	up
Unigene0043825	0.2995	0.0889	0.0498	49.3385	1.1194	54.9833	7.91063	1.95395e-10	1.11797e-07	up
Unigene0032312	0	0	0.0423	3.1493	3.6047	3.3082	7.89407	1.54564e-12	1.81843e-09	up
Unigene0024186	0	0	0.0706	10.8189	4.4776	0	7.75932	1.16859e-05	0.000942857	up
Unigene0051330	0.0601	0	0.1199	2.3886	16.827	19.6801	7.75547	1.6381e-14	3.49648e-11	up
Unigene0047582	0.2257	0.2009	0.5403	111.423	5.5683	89.3575	7.7375	6.40001e-14	1.04387e-10	up
Unigene0000937	0	0	0.309	34.2402	3.2884	25.2507	7.66654	2.75475e-11	2.05935e-08	up
Unigene0030268	0.2263	0.1007	0	38.4872	2.084	25.7158	7.66329	1.76053e-11	1.4799e-08	up
Unigene0048668	0	0	0.0738	0.084	6.8126	7.9836	7.65556	4.69604e-07	7.08017e-05	up
Unigene0064433	0	0.0591	0.0662	7.6839	8.8489	8.3718	7.63488	1.98073e-20	4.14654e-16	up
Unigene0029271	0.0451	0	0	2.4926	2.963	3.2733	7.59653	1.50408e-14	3.37319e-11	up
Unigene0031187	0.1305	0	0.0651	20.3491	2.143	14.8807	7.57794	1.58164e-11	1.35128e-08	up
Unigene0033569	0	0.1446	0	14.261	0.5854	12.482	7.56219	4.8948e-08	1.13316e-05	up
Unigene0034329	0	0.0886	0	7.8346	0.4783	8.111	7.53427	2.07002e-08	5.78043e-06	up
Unigene0046004	0	0.0208	0	2.1067	0.1873	1.4714	7.50008	2.57258e-07	4.4063e-05	up
Unigene0005318	0	0.0814	0	8.5085	1.0248	4.9653	7.47667	1.22565e-07	2.41649e-05	up
Unigene0038751	0	0	0.3156	32.4523	4.0552	18.0959	7.43475	1.96939e-11	1.62455e-08	up
Unigene0029649	0.0174	0	0	1.8218	0.0559	1.0598	7.39936	1.93961e-06	0.000226707	up
Unigene0055804	0	0.0789	0	5.6006	0.2839	7.19	7.37251	1.2743e-07	2.48509e-05	up
Unigene0007833	0.0751	0.1003	0.2997	43.5815	1.775	33.2941	7.37108	1.55012e-11	1.34031e-08	up
Unigene0052480	0.0571	0	0	7.2658	2.174	0	7.36912	3.05614e-05	0.0019324	up
Unigene0049847	0	0.0513	0	4.7785	0.0693	3.5136	7.34864	3.16043e-07	5.12942e-05	up
Unigene0037245	0	0.0226	0	1.9019	0.122	1.6239	7.33456	3.95062e-08	9.77657e-06	up
Unigene0029269	0.0543	0	0	2.9988	3.1952	2.4831	7.32012	5.33908e-13	7.09563e-10	up
Unigene0028701	0	0	0.115	9.0294	1.0155	7.7864	7.27663	8.10618e-09	2.58555e-06	up
Unigene0047399	0	0.0543	0	4.9851	0.1465	3.0952	7.24324	7.70325e-06	0.000686747	up
Unigene0064956	0	0.0989	0	11.4326	3.5139	0	7.23962	4.9811e-05	0.00276897	up
Unigene0015871	0.1539	0	0	12.6935	1.4172	8.9089	7.22473	8.99126e-09	2.81776e-06	up
Unigene0035670	0	0.0715	0	5.0774	1.0939	4.4796	7.21882	6.07121e-10	2.9211e-07	up
Unigene0070372	0	0.1004	0.0562	0.1707	18.8736	4.2716	7.21809	9.1862e-07	0.000123226	up
Unigene0006032	0.0599	0	0	0.0453	5.3731	3.4039	7.20246	3.03022e-06	0.000328004	up
Unigene0057840	0	0.0304	0	2.6988	0.082	1.4635	7.12531	7.11334e-07	9.85513e-05	up
Unigene0036066	0.3776	0	0	30.293	2.117	20.2434	7.12352	3.43495e-09	1.2025e-06	up
Unigene0024598	0	0.069	0	4.4266	0.1241	5.0668	7.12292	1.32925e-06	0.000164632	up
Unigene0043627	0.1546	0.0688	0.6937	75.2837	4.7974	42.8715	7.06681	3.45657e-11	2.48064e-08	up
Unigene0005805	0	0.1567	0	0.2665	14.3847	5.601	7.01393	3.35119e-06	0.000357889	up
Unigene0040201	0	0.1382	0.0774	20.862	0	6.9378	7.01057	2.6657e-05	0.00175995	up
Unigene0044353	0	0.0835	0	7.0658	3.3065	0	6.95674	7.13317e-05	0.00364096	up
Unigene0045465	0.1846	0	0.3069	37.079	2.169	21.7554	6.95555	3.9198e-10	2.05334e-07	up
Unigene0045945	0	0	0.0345	1.974	0.1937	2.1113	6.95453	1.50473e-07	2.81953e-05	up
Unigene0001260	0	0	0.1951	13.2486	0.4699	10.1361	6.93391	7.0761e-07	9.82251e-05	up
Unigene0067088	0.0445	0	0	1.9217	1.6055	1.9105	6.93305	4.45341e-11	3.10295e-08	up
Unigene0055287	0.0187	0.0333	0.0373	3.0266	3.5322	4.221	6.91545	1.57115e-17	9.39628e-14	up
Unigene0027869	0	0.025	0	1.5283	0.0899	1.3833	6.90761	1.16699e-05	0.000942857	up
Unigene0051038	0	0	0.0556	0.9699	2.8115	2.7482	6.87577	1.32015e-07	2.5537e-05	up
Unigene0030604	0	0.0616	0	4.6063	0	2.4719	6.84431	0.000260885	0.0095475	up
Unigene0000689	0	0	0.3098	20.1568	0.995	14.1532	6.83239	1.22913e-07	2.41671e-05	up
Unigene0037809	0.4268	0	0.1703	41.5365	1.2305	25.0753	6.82807	2.23476e-08	6.07499e-06	up
Unigene0029344	0.034	0	0	2.3149	0.245	1.2997	6.82677	1.37608e-07	2.61952e-05	up
Unigene0053948	0.1846	0.1096	0.1228	31.4426	15.7742	0.088	6.8258	8.95049e-07	0.000120289	up
Unigene0001037	0	0	0.0848	0.3861	9.1935	0	6.81976	0.000422378	0.0136235	up
Unigene0006704	0	0.0356	0	2.06	0.0962	1.8598	6.81774	1.43855e-06	0.000175278	up
Unigene0032567	0	0	0.0862	7.4591	2.2157	0	6.8104	9.72041e-05	0.00459246	up
Unigene0041209	0.0846	0	0	5.3143	0.0678	4.0516	6.80102	7.30153e-06	0.000663293	up
Unigene0004135	0.258	0	0	19.8214	0.8266	7.9309	6.79144	2.28989e-06	0.000259615	up
Unigene0041171	0	0.0726	0.0813	9.871	0.7182	6.0598	6.7573	7.50259e-09	2.44741e-06	up
Unigene0010364	0	0.0902	0	8.2067	0	1.4488	6.74208	0.000212321	0.00817205	up
Unigene0005192	0	0.0248	0	1.6447	0.0893	0.7568	6.65013	3.58001e-05	0.00217179	up
Unigene0045439	0.0554	0.0986	0	9.5385	0.6877	4.8509	6.61328	3.61212e-09	1.25839e-06	up
Unigene0012925	0	0.0656	0	3.5709	0.059	2.7666	6.60744	1.75493e-05	0.00127862	up
Unigene0030567	0	0.0659	0	0.3923	5.9306	0	6.58416	0.000593494	0.0173211	up
Unigene0036208	2.9169	0	0.3117	188.747	12.1812	108.418	6.58217	1.6767e-07	3.08539e-05	up
Unigene0009730	0.0858	0	0	1.0389	3.9852	3.1888	6.58077	1.35149e-06	0.000166938	up
Unigene0003922	0	0	0.6977	0.2647	44.8505	21.6519	6.58039	7.02337e-05	0.00360543	up
Unigene0004798	0	0.0802	0	4.1914	0.2164	3.2506	6.5773	3.09562e-06	0.000334579	up
Unigene0067604	0	0	0.0871	5.289	3.0084	0	6.57384	0.000346501	0.0118358	up
Unigene0045908	0	0.0408	0	2.5491	0.2202	1.0482	6.54792	1.14311e-06	0.000145197	up
Unigene0053291	0	0.1187	0	6.4098	2.8842	1.7637	6.54159	4.56573e-08	1.09221e-05	up
Unigene0019631	0.0382	0	0	1.0975	1.1309	1.3093	6.5331	2.95271e-07	4.88259e-05	up
Unigene0048770	0	0.0449	0	2.9322	0.0202	1.1998	6.53102	1.97084e-05	0.00140596	up
Unigene0050831	0.218	0.3603	0.0621	33.0691	1.4547	24.6077	6.52881	2.24422e-10	1.24852e-07	up
Unigene0044616	0	0	0.1214	3.11	4.7295	3.3289	6.52351	7.76325e-12	7.14279e-09	up
Unigene0055127	0	0	0.0836	4.8235	1.6791	1.019	6.49139	4.82919e-06	0.000480682	up
Unigene0039903	0	0.0976	0.328	9.292	10.8867	17.9437	6.485	5.1804e-12	5.16357e-09	up
Unigene0020227	0	0	0.3924	19.5056	1.9696	13.6409	6.48366	6.23072e-08	1.38319e-05	up
Unigene0008964	0	0.0788	0.1765	12.3921	1.2405	9.11	6.47706	1.81067e-09	6.73289e-07	up
Unigene0036982	0	0.0282	0	1.1012	0.1773	1.1305	6.4166	6.13553e-07	8.75473e-05	up
Unigene0039047	0	0.0816	0	4.3352	0.2202	2.3257	6.39793	6.7431e-06	0.00062442	up
Unigene0006062	0.0878	0.0782	0.1752	7.0446	13.2921	8.4108	6.39668	2.93117e-16	9.56175e-13	up
Unigene0047112	0	0.0811	0	3.964	0.2553	2.5719	6.38782	4.35703e-07	6.72444e-05	up
Unigene0035194	0	0	0.5499	26.2912	2.0609	17.6708	6.38704	1.38251e-07	2.62479e-05	up
Unigene0016733	0	0.0475	0	1.8162	1.9647	0.1525	6.37171	7.35311e-05	0.00371099	up
Unigene0040662	0.1268	0.2258	1.2016	0.096	94.2577	34.3113	6.3713	1.91287e-05	0.00136732	up
Unigene0048553	0.0553	0.0492	0	5.0648	0.3987	3.1825	6.37046	6.16027e-08	1.37725e-05	up
Unigene0008534	0.2126	0.2839	1.0604	73.2241	3.2358	51.4121	6.35988	1.23229e-09	4.9964e-07	up
Unigene0004757	0.3259	0.0484	0.1084	24.7087	0.8266	14.0174	6.35651	7.47818e-09	2.44741e-06	up
Unigene0050079	0.1011	0.0277	0.0775	9.0037	0.7535	6.953	6.33984	4.36925e-12	4.5444e-09	up
Unigene0018749	0	0.091	0	5.6889	1.5562	0	6.315	0.000389701	0.0128763	up
Unigene0036998	0.5774	0.257	0.1152	47.8683	0.763	26.8659	6.31296	3.85076e-08	9.69661e-06	up
Unigene0048758	0	0.0429	0.0962	6.1688	0.3863	4.2404	6.27816	4.88899e-08	1.13316e-05	up
Unigene0048817	0.1542	0.3432	0.3076	16.5745	23.3452	22.4889	6.27661	1.98396e-18	1.77976e-14	up
Unigene0039089	0.0497	0.0221	0.1239	7.5597	0.6965	6.909	6.27598	8.17379e-10	3.57683e-07	up
Unigene0009617	1.1791	0.3149	1.0583	38.1029	87.8203	71.4257	6.27281	2.31114e-20	4.14654e-16	up
Unigene0010678	0	0	0.089	0.8777	2.2507	3.7305	6.26803	4.25298e-07	6.59669e-05	up
Unigene0046031	0	0.1543	0	6.642	0.6595	4.5848	6.26742	1.48905e-07	2.79746e-05	up
Unigene0010729	0	0.0364	0	1.7647	0.0655	0.9649	6.26282	0.000221977	0.00846012	up
Unigene0003119	0	0	0.1571	0.1192	7.778	4.1275	6.25817	1.29567e-05	0.00102182	up
Unigene0004102	0.1096	0	0.1093	11.2416	0.9658	4.5055	6.25455	6.73972e-08	1.45688e-05	up
Unigene0003968	0	0.4113	0.0922	25.5968	0.7401	11.4271	6.22888	1.39979e-06	0.000171722	up
Unigene0043337	0	0.0713	0	1.6359	0.5129	3.1474	6.21491	4.2786e-05	0.00247827	up
Unigene0048216	0.2156	0.4222	0.215	34.1322	1.5712	27.398	6.20932	1.07266e-10	6.69393e-08	up
Unigene0040695	0	0.1593	0.0595	3.8588	7.4268	4.8167	6.20151	3.70773e-13	5.43039e-10	up
Unigene0048907	0	0.1357	0	2.6541	3.175	4.1052	6.19393	3.03704e-09	1.07367e-06	up
Unigene0010052	0	0	0.4754	19.8858	2.0519	12.7339	6.18847	1.94644e-07	3.51859e-05	up
Unigene0033836	0	0.0989	0	1.387	3.7363	2.0643	6.1834	2.25016e-07	3.99716e-05	up
Unigene0007564	0	0	0.054	1.8046	0.4774	1.5881	6.16327	1.31282e-05	0.00103307	up
Unigene0048174	0.3638	0.3886	1.2337	32.9315	59.5877	49.6446	6.16147	3.45171e-20	4.95432e-16	up
Unigene0032004	0	0.1657	0	7.4999	0.2236	4.0904	6.15577	7.76514e-06	0.000690549	up
Unigene0066880	0	0.0393	0	1.455	0.1416	1.2004	6.15321	6.54202e-06	0.000612589	up
Unigene0042134	0.0118	0.0844	0.0945	6.5798	0.4933	6.3414	6.13634	7.94426e-10	3.53754e-07	up
Unigene0007907	0.1557	0	0	5.419	0.1247	5.2293	6.11251	4.47023e-05	0.00255266	up
Unigene0001226	0.6869	0.6115	0.6851	84.1324	3.5759	48.6907	6.10364	6.9703e-10	3.2273e-07	up
Unigene0070638	0	0.2148	0.1203	13.4241	1.208	8.3661	6.10079	3.71956e-08	9.48142e-06	up
Unigene0011387	0.2668	0.1187	0.0665	14.4852	1.9228	14.4911	6.0951	1.02247e-09	4.26621e-07	up
Unigene0037616	0	0	0.1567	7.2237	0.5033	2.8638	6.07866	2.01599e-06	0.000234489	up
Unigene0019292	0	0.0995	0	1.8617	2.0149	2.7574	6.05904	1.63122e-07	3.01653e-05	up
Unigene0015085	0.1498	0.6332	1.4188	2.38	79.8768	64.4118	6.05773	4.09677e-08	1.00688e-05	up
Unigene0001459	0.1991	0	0	7.9099	0.3189	4.9804	6.05191	2.27788e-05	0.00155838	up
Unigene0046457	0	0	0.0841	1.8498	2.2613	1.4157	6.03819	2.28986e-07	4.04764e-05	up
Unigene0016443	0	0.0504	0	1.6696	0.2265	1.4152	6.03783	0.000126127	0.00562562	up
Unigene0031059	0.0731	0	0	2.5995	0	2.194	6.03506	0.00112834	0.0275637	up
Unigene0022572	0	0.9817	0	41.8017	1.5457	20.4955	6.0231	8.39057e-06	0.000731662	up
Unigene0023622	0	0.2428	0	10.0103	0.2184	5.4582	6.01365	9.87156e-05	0.00464552	up
Unigene0037140	0.0978	0.0871	0	7.6235	0.4699	3.8447	6.01268	9.90283e-07	0.000130401	up
Unigene0046643	0.0525	0.0935	0.1047	8.1246	0.7147	7.0355	5.98463	7.8594e-10	3.52524e-07	up
Unigene0026307	0	0	0.306	10.9907	0.4095	7.968	5.98401	2.41614e-05	0.00162967	up
Unigene0002265	0.3338	0.1114	0.2913	27.3289	1.086	18.1767	5.98324	1.50118e-09	5.8871e-07	up
Unigene0064355	0	0.0418	0	1.0297	0.1879	1.4084	5.97322	0.000158615	0.00660659	up
Unigene0034549	0	0.7319	0	8.3379	23.9682	13.5165	5.96827	7.76884e-09	2.51143e-06	up
Unigene0029513	0	0.0782	0	2.8799	0.211	1.7784	5.9604	6.26721e-06	0.000594146	up
Unigene0035870	0.0653	0	0	2.3955	0	1.656	5.95523	0.000429366	0.0137663	up
Unigene0036444	0	0.1636	0	5.4252	0.0736	4.6312	5.95232	5.78471e-05	0.00311671	up
Unigene0038773	0.7966	0.0788	0.6179	55.4964	2.9417	33.9729	5.95149	6.71649e-09	2.23156e-06	up
Unigene0002905	0.0619	0.0551	0.1236	9.2125	0.9178	4.605	5.9365	1.78804e-09	6.71835e-07	up
Unigene0071150	0	0.0811	0	1.6557	1.7521	1.4986	5.91882	2.96702e-05	0.00189947	up
Unigene0061614	0.3643	0.054	0	15.8525	0.5349	8.788	5.91133	1.72469e-06	0.000204586	up
Unigene0040910	0	0	0.0391	2.0167	0	0.3361	5.91107	0.00264917	0.0497047	up
Unigene0001701	0.1026	0	0	2.2514	0.1643	3.7396	5.90673	0.000362397	0.0121816	up
Unigene0040814	0	0.0359	0.0402	2.1359	0.4844	1.9309	5.90221	3.70751e-08	9.48142e-06	up
Unigene0049571	0.4399	0.5385	0.0731	32.143	3.2591	27.4361	5.90112	1.41928e-10	8.41788e-08	up
Unigene0035853	0	0.0581	0	2.3461	0.0523	1.0729	5.90079	0.000146498	0.00626556	up
Unigene0042270	0	0.7089	1.8365	3.8796	99.0913	48.9148	5.89895	1.74093e-06	0.000206171	up
Unigene0063939	0.0818	0	0	3.1579	0.7863	0.9357	5.89861	7.29974e-05	0.00368925	up
Unigene0032406	0	0	0.1904	6.9128	0.3059	4.1175	5.89576	6.54705e-06	0.000612589	up
Unigene0050099	0	0.0942	0	1.5216	2.034	2.0422	5.89299	3.53783e-05	0.00215714	up
Unigene0044802	0	0	0.2032	2.2612	3.9156	5.8244	5.88413	1.24398e-07	2.43857e-05	up
Unigene0051507	0.0902	0.0401	0	2.3715	2.7804	2.4815	5.87242	1.51474e-11	1.3257e-08	up
Unigene0033096	0.0917	0	0	4.3699	0.4404	0.5241	5.86226	0.000457287	0.014428	up
Unigene0042636	0.059	0.2099	0.0588	5.0417	7.9558	6.047	5.86085	7.06747e-15	1.81144e-11	up
Unigene0048625	0.1609	0	0.0802	2.6178	1.9328	9.4299	5.85764	6.32641e-07	8.99052e-05	up
Unigene0033405	0.0764	0	0	3.0071	1.4075	0	5.85257	0.0019369	0.0403558	up
Unigene0004008	0	0.0618	0.1384	3.2292	2.2781	6.0005	5.84503	3.28896e-10	1.75944e-07	up
Unigene0070613	0	0.0418	0	1.3867	0.0753	0.9403	5.84477	0.000643441	0.0184239	up
Unigene0040661	0	0.5869	0.4932	0.6238	46.1399	15.0225	5.83805	6.27544e-06	0.000594146	up
Unigene0027534	0.1617	0.7915	0	33.5843	1.1005	19.6439	5.83279	1.97515e-06	0.000230111	up
Unigene0001026	0	0.047	0	1.1194	0.3385	1.2083	5.82598	0.000128097	0.00569578	up
Unigene0069622	0	0	0.1076	3.755	1.7709	0.5397	5.8169	1.85489e-05	0.00133518	up
Unigene0015365	0	0.093	0	1.0677	1.5692	2.577	5.80899	4.63153e-08	1.09967e-05	up
Unigene0047976	0	0.5013	0	15.2642	0.9585	11.8753	5.80865	9.70862e-06	0.000824554	up
Unigene0050557	0.7245	0.3225	0.3613	0.7676	31.7976	45.831	5.79876	1.84957e-07	3.3775e-05	up
Unigene0006888	0.1331	0.237	0.7965	44.528	1.3859	18.9343	5.79668	5.40604e-07	7.93822e-05	up
Unigene0016191	0.0723	0	0	1.6414	0.4632	1.912	5.79584	8.56629e-05	0.00415384	up
Unigene0040787	0.0629	0	0	1.7623	0.504	1.2146	5.79026	6.53859e-05	0.0034289	up
Unigene0047743	0	0.0233	0.0521	2.325	0.1885	1.6446	5.78522	3.38887e-07	5.40399e-05	up
Unigene0012766	0	0.0482	0	1.7212	0.1951	0.7354	5.78174	2.72674e-05	0.0017871	up
Unigene0041375	0	0	0.3358	11.3716	1.6517	5.3851	5.77662	6.3954e-07	9.0527e-05	up
Unigene0048759	0	0	0.1486	4.679	0.3778	3.0881	5.77639	2.70425e-06	0.000299495	up
Unigene0043870	0	0.161	0.1803	1.0949	7.0965	10.4698	5.77286	9.49514e-07	0.000125957	up
Unigene0043666	0.7519	1.0784	2.0831	121.181	6.156	86.6222	5.77277	3.89579e-10	2.05334e-07	up
Unigene0034226	0	0.0262	0	0.8562	0.0706	0.5041	5.77121	4.33837e-05	0.00250279	up
Unigene0043871	0	0.0817	0.3204	0.8509	6.6337	14.3502	5.76293	4.09566e-07	6.43171e-05	up
Unigene0037452	0.3983	0.4333	0	26.3583	1.8253	16.8915	5.7603	1.73879e-07	3.19146e-05	up
Unigene0037567	0	0.1724	0	4.6158	0.7753	3.9097	5.75352	1.13253e-06	0.000144364	up
Unigene0016634	0.3036	0	0	3.3313	7.5977	5.3704	5.7465	5.15093e-08	1.18862e-05	up
Unigene0038110	0	0.051	0.0571	4.1156	0.0917	1.5957	5.74636	2.67158e-05	0.00176059	up
Unigene0044050	0.0178	0.0635	0	2.3693	0.3286	1.6448	5.73919	2.69147e-08	7.12752e-06	up
Unigene0038158	0.1865	0.1245	0	10.0384	0.3921	6.1651	5.73774	6.43782e-07	9.09482e-05	up
Unigene0001221	0	0	0.1111	2.8255	0.6248	2.4694	5.73559	1.27843e-05	0.00101267	up
Unigene0015462	0	0.1884	0	8.489	0.1695	1.3615	5.73294	0.000475965	0.0148772	up
Unigene0063828	0	0.0739	0	1.8852	0.532	1.4837	5.72209	0.000182388	0.00733828	up
Unigene0026600	0	0	0.0634	1.6604	0.3565	1.3182	5.7171	1.42279e-05	0.0010909	up
Unigene0035804	0	0	0.1756	1.6658	1.9744	5.538	5.70785	1.06312e-05	0.000876963	up
Unigene0005821	0	0.0322	0	0.8207	0.2316	0.6201	5.69872	0.000184526	0.00741056	up
Unigene0053915	0	0.1009	0	1.3723	2.9044	0.891	5.67852	0.000202492	0.00790996	up
Unigene0042697	0	0.0792	0	2.4731	0.0712	1.5095	5.67763	5.35546e-05	0.00293838	up
Unigene0070707	0	0	0.076	0.7501	0.7938	2.3432	5.67655	0.000129973	0.00575779	up
Unigene0042399	0	0	0.1711	5.7137	0.8245	2.2076	5.67568	3.87905e-05	0.0023045	up
Unigene0061892	0	0.0788	0	0.9378	1.6304	1.4551	5.67404	0.000104735	0.00485556	up
Unigene0036207	0.1358	0	0.1354	9.867	1.1964	2.7181	5.66723	3.82698e-05	0.00228381	up
Unigene0058169	0	0	0.127	0	5.6076	0.819	5.66116	0.00168049	0.0364421	up
Unigene0066891	0	0.0876	0	2.0846	0.8666	1.4766	5.65952	0.000148224	0.00632053	up
Unigene0004674	1.6174	3.2186	2.4428	195.216	13.1276	152.589	5.63189	2.28001e-11	1.7981e-08	up
Unigene0045943	0	0.047	0	0.7996	0.1692	1.3593	5.63035	0.000582916	0.0171028	up
Unigene0028795	0.144	0	0	2.615	1.3836	3.0872	5.62079	5.99717e-06	0.000576162	up
Unigene0047999	0.0547	0.3897	0.6003	28.783	2.1913	20.3786	5.61929	1.44585e-08	4.32344e-06	up
Unigene0005209	0.8657	4.7777	5.1368	121.006	227.611	181.02	5.61855	1.31679e-15	3.93754e-12	up
Unigene0022754	0	0.1061	0.1188	6.6737	0.2863	4.0459	5.61285	1.50315e-05	0.00113667	up
Unigene0043315	0	0.2148	0	6.7577	0	3.7087	5.60663	0.00136675	0.0315389	up
Unigene0039192	0.4799	0.0854	0.1436	20.6655	0.5189	13.3092	5.6046	3.07198e-07	5.03341e-05	up
Unigene0019397	0	0.1389	0	4.0737	0	2.6765	5.60281	0.00131072	0.0305802	up
Unigene0011865	0.5519	1.0877	0	42.9282	1.2312	35.05	5.59426	6.46144e-06	0.000606953	up
Unigene0040694	0	0.1148	0	1.0741	2.8932	1.5677	5.59139	0.000241113	0.0089936	up
Unigene0064580	0	0.1645	0	2.238	3.9595	1.6843	5.58237	2.63717e-07	4.47826e-05	up
Unigene0001364	0	0.0455	0	0.7353	0.4095	1.0234	5.57449	0.000216998	0.00831411	up
Unigene0052769	0	0.3861	0	14.0066	2.2581	2.1187	5.57329	6.50129e-06	0.000609898	up
Unigene0038442	0.4237	0.1257	0	16.0339	0.0848	9.9947	5.57079	6.32203e-05	0.00333363	up
Unigene0039482	0.0472	0.042	0	2.1617	0.0756	1.9742	5.56115	3.00188e-05	0.00191524	up
Unigene0029068	0	0.1048	0	2.0488	0.2357	2.6501	5.55722	0.000100431	0.00470387	up
Unigene0033243	0.3679	0	0	1.6708	6.7778	8.8544	5.55556	8.18936e-07	0.000111521	up
Unigene0056792	0	0.1039	0.0582	1.8544	3.1304	2.6271	5.5533	3.64085e-07	5.76797e-05	up
Unigene0002329	0	0	0.0753	2.3157	0.7563	0.432	5.54021	5.95851e-05	0.00317932	up
Unigene0067974	0	0	0.15	4.4399	0	2.5267	5.53742	0.00117817	0.0282523	up
Unigene0050548	0	0.2791	0.5471	0.1779	24.9824	13.165	5.53566	4.02295e-05	0.00237232	up
Unigene0048909	0	0	0.272	4.0248	3.0579	5.4582	5.52689	8.32441e-06	0.00073033	up
Unigene0048318	0	0.5784	0.162	19.4859	1.4961	13.1207	5.52544	5.35212e-07	7.88707e-05	up
Unigene0041220	0.0653	0.0291	0	2.2248	0.1046	2.0078	5.52183	6.00687e-05	0.00319799	up
Unigene0061555	0	0.0479	0	1.2612	0.0861	0.8453	5.51647	0.00143718	0.0325983	up
Unigene0045025	0	0.1475	0	1.2537	2.587	2.9009	5.5143	1.03946e-05	0.000865404	up
Unigene0016215	0.1412	0.2515	0.1409	0.4276	8.6535	15.2444	5.51057	1.80929e-06	0.000213211	up
Unigene0035439	0	0	0.1451	1.9825	2.3893	2.2365	5.50916	6.64864e-06	0.000618388	up
Unigene0003424	0	0	0.0774	2.4094	0.2488	0.8325	5.49504	0.000739976	0.0203991	up
Unigene0049102	0	0	0.681	0.2584	13.1935	17.205	5.49241	0.000147212	0.00628482	up
Unigene0015678	0	0	0.1461	0.7206	2.1117	3.717	5.48631	5.33082e-05	0.00293158	up
Unigene0032812	0.1138	0.3292	0.1703	16.2356	0.8659	10.3718	5.48529	1.45295e-08	4.32667e-06	up
Unigene0032066	0	0	0.1784	4.0619	0.8597	3.0691	5.48513	4.73748e-05	0.00266241	up
Unigene0033211	0	0	0.0735	1.4786	0.1771	1.6336	5.48389	6.24766e-05	0.0033046	up
Unigene0012303	0	0.0453	0	1.2848	0.0544	0.6795	5.47777	0.000114025	0.00519455	up
Unigene0043593	0	0.0653	0	1.9443	0.0882	0.8657	5.47193	0.000311784	0.0108992	up
Unigene0016464	0	0	0.0937	0.7111	1.2793	2.1492	5.4653	0.000217219	0.00831411	up
Unigene0007868	0	0.1313	0.1471	1.9528	5.7274	4.5846	5.46122	2.31125e-07	4.07541e-05	up
Unigene0048210	0.4443	0.6592	0	26.3678	3.588	17.9431	5.43983	3.68092e-08	9.46827e-06	up
Unigene0060139	0	0.1061	0	0.8568	0.6681	3.0663	5.43537	6.66445e-05	0.00347501	up
Unigene0069770	0.102	0	0	1.2346	0.9799	2.1864	5.43116	0.000189507	0.00755985	up
Unigene0005580	0	0.2589	0.8702	0.587	17.9362	30.1447	5.42973	2.04858e-05	0.00143014	up
Unigene0068509	0	1.731	3.2969	55.4099	77.1701	83.8852	5.42804	9.64999e-10	4.08898e-07	up
Unigene0012877	0	0	0.0531	1.3107	0.128	0.838	5.42209	8.40404e-05	0.00409175	up
Unigene0043982	0.9015	0.0845	0.1893	30.881	0.76	18.517	5.41538	2.36215e-06	0.000266963	up
Unigene0062896	0	0.075	0	1.9774	0.3375	0.8735	5.4098	7.55104e-05	0.00379222	up
Unigene0033725	0	0.1557	0	3.2437	0.2102	3.1574	5.40809	5.40547e-05	0.00295903	up
Unigene0010063	0	0	0.1017	0.926	1.3474	2.0406	5.40663	2.0348e-05	0.00142678	up
Unigene0044862	0	0	2.1547	0.3442	33.4225	57.6264	5.40653	0.00072553	0.020127	up
Unigene0029158	0.128	0.171	0.3192	15.6489	0.6665	9.8837	5.4053	6.24465e-08	1.38319e-05	up
Unigene0046471	0.1953	0.4346	0.2922	20.0657	1.9553	16.8573	5.3979	1.3737e-09	5.44668e-07	up
Unigene0031863	0	0	0.1317	2.7486	0.5288	2.2656	5.39534	8.42015e-05	0.00409404	up
Unigene0037440	0	0.3205	0	1.862	6.3439	5.2758	5.39453	6.77209e-07	9.4738e-05	up
Unigene0049835	0.1452	0.1293	3.5482	1.6485	75.2466	83.401	5.39	5.51341e-05	0.00299981	up
Unigene0002784	0	0.0478	0.1606	4.001	0.3009	4.431	5.38903	3.00899e-06	0.000326902	up
Unigene0045499	1.3531	2.8606	3.2048	181.123	14.2229	113.237	5.37838	9.97613e-11	6.28024e-08	up
Unigene0048777	0.2005	0	2.1992	0.354	53.838	45.4706	5.37613	0.000298853	0.0105549	up
Unigene0046877	0	0	0.3766	8.6687	0.3528	6.5004	5.36513	7.70689e-05	0.00383825	up
Unigene0043948	0.0858	1.3373	0.214	38.0724	0.9282	28.3798	5.36311	5.37464e-06	0.000527656	up
Unigene0011859	0.3162	0.1126	0.3153	5.4794	12.6604	12.4292	5.36043	1.83587e-14	3.6845e-11	up
Unigene0026641	0	0.4152	0.5039	7.266	16.6859	13.7528	5.35838	8.14944e-11	5.2219e-08	up
Unigene0002779	0	0.2138	0	1.6965	2.7571	4.2918	5.35419	4.38939e-06	0.000443988	up
Unigene0045133	0.0928	0.2478	0.8329	27.7396	1.8208	18.4388	5.35412	9.49021e-08	1.96275e-05	up
Unigene0008823	0	0	0.1234	0.1874	2.2801	2.5658	5.35009	0.0014983	0.0336338	up
Unigene0002551	0	0.0549	0	1.3534	0.0494	0.8154	5.33644	0.000573854	0.01692	up
Unigene0018847	0.0501	0	0	0.8348	0.0402	1.1469	5.33476	0.00231362	0.0455401	up
Unigene0048441	0.1621	0	0	0.4906	2.3361	3.7066	5.33286	0.000855148	0.0225688	up
Unigene0070706	0	0	0.0993	0.7533	1.435	1.7787	5.32011	0.000308478	0.0108097	up
Unigene0043245	0.029	0.4522	0.2461	20.2569	0.093	8.6218	5.31595	3.98702e-05	0.00235306	up
Unigene0006505	0	0	0.5751	0.2182	14.7799	7.9008	5.31532	0.000275008	0.00992268	up
Unigene0000504	0	0.0665	0.298	9.5555	0.4787	4.459	5.31331	8.23272e-06	0.000724369	up
Unigene0041678	0.0687	0	0	1.689	0	1.0307	5.30699	0.00188222	0.0395239	up
Unigene0002112	0	0.1176	2.0415	0.7496	33.2116	51.2582	5.30268	0.000179998	0.00728198	up
Unigene0046717	0.4295	1.1088	1.7134	72.1304	7.4989	48.1385	5.29619	2.16091e-10	1.21156e-07	up
Unigene0030045	0	0.0661	0	1.6868	0.0298	0.8762	5.29372	0.0011496	0.0278913	up
Unigene0016875	0	0.0756	0	0.707	1.1562	1.0926	5.28902	0.00052676	0.0159374	up
Unigene0002321	0.0571	0	0	1.384	0.2746	0.5719	5.28773	0.000763968	0.0208885	up
Unigene0039469	0.451	0	0	11.6055	0	6.0044	5.28712	0.00186912	0.0393373	up
Unigene0021761	0.0576	1.1021	0.201	11.6366	19.6475	21.7544	5.28462	5.31825e-10	2.59639e-07	up
Unigene0035440	0	0	0.1033	1.097	1.0779	1.8501	5.28408	0.000294256	0.0104491	up
Unigene0032535	0	0	0.2402	5.2871	0.4823	3.5298	5.2748	4.83594e-05	0.00270293	up
Unigene0042322	0	0.3472	0.0778	7.6456	0.9996	7.8065	5.27463	9.46933e-07	0.000125847	up
Unigene0044296	0	0.124	0.6253	15.8702	0.9485	12.1504	5.27283	5.15423e-06	0.000508802	up
Unigene0044896	0.226	0	0	5.6967	0.181	2.8598	5.27283	0.00013079	0.00577971	up
Unigene0039750	0.0248	0.0442	0	1.5796	0.199	0.888	5.27226	1.77395e-05	0.00129048	up
Unigene0049456	0.3541	0.1146	0.0321	12.791	0.1289	6.397	5.26949	1.43753e-05	0.00109985	up
Unigene0009897	0.0097	0.1299	0.0291	3.3211	0.4598	2.7159	5.2672	2.47829e-08	6.63646e-06	up
Unigene0030514	1.8507	5.3543	1.2305	168.78	10.0051	146.067	5.26717	1.69057e-08	4.93193e-06	up
Unigene0061210	0.1245	0	0	2.7789	0.0997	1.9128	5.26623	0.000458552	0.0144536	up
Unigene0042644	0	0.0764	0	1.7531	0.0344	1.1498	5.26477	0.000337811	0.0116053	up
Unigene0046187	0.1529	0.953	0.3051	11.3046	23.15	19.4951	5.25683	7.48181e-13	9.41999e-10	up
Unigene0024624	0.1052	0.1872	0.035	6.6054	0.6036	5.299	5.25565	2.22838e-08	6.07499e-06	up
Unigene0011425	0	0	0.1365	1.4507	1.919	1.8105	5.24603	3.12948e-05	0.00196492	up
Unigene0027213	0	0.2042	0.6862	4.9038	12.5831	16.2717	5.24466	9.07661e-09	2.83214e-06	up
Unigene0038044	0.2157	0.192	0.1076	8.9793	0.3455	10.1768	5.24204	2.08455e-06	0.00024168	up
Unigene0011619	0	0.0956	0	2.2562	0.086	1.267	5.23852	0.000180005	0.00728198	up
Unigene0007694	0	0	0.1182	0.1794	1.8986	2.3723	5.2346	0.00205313	0.0420025	up
Unigene0021016	0	0.1214	0	1.032	1.9112	1.6082	5.22847	3.44978e-05	0.00211223	up
Unigene0069384	0	0.2156	0	4.8574	0.194	3.0296	5.2281	0.000782131	0.0212535	up
Unigene0045498	0.1137	0	0	1.1188	0	3.1292	5.22348	0.00263631	0.0495282	up
Unigene0048511	0	0	0.2003	5.0166	0.1609	2.2972	5.22178	0.000598661	0.0174082	up
Unigene0041080	0.1784	0	0	0.6752	2.6437	3.316	5.21689	1.36628e-05	0.00105971	up
Unigene0040270	0	0	0.0862	2.2246	0.2077	0.7725	5.2164	0.000228362	0.00863923	up
Unigene0008339	0	0.0567	0	0.9394	0.051	1.1147	5.2144	0.000741276	0.0204138	up
Unigene0000601	0	0.2495	0	2.6165	2.1702	4.4748	5.21413	7.58734e-06	0.000679792	up
Unigene0053127	0	0.1687	0	0.502	1.1384	4.6058	5.21045	0.000403914	0.0132277	up
Unigene0057920	0	0.0524	0	0.8908	0.1414	0.9044	5.20782	0.000224166	0.00852543	up
Unigene0068487	0	0	0.0808	1.2264	0.6489	1.1004	5.20273	0.000435633	0.0139135	up
Unigene0049091	0.7871	0.1236	0.1847	23.1795	1.4276	15.6042	5.19807	1.19789e-07	2.37586e-05	up
Unigene0044905	0	0.1502	0	2.7463	0.1352	2.6239	5.19589	0.000178707	0.00725399	up
Unigene0056623	0.1415	0	0	2.678	1.587	0.9105	5.19282	0.00061851	0.0178767	up
Unigene0046710	0.1298	0	0	2.9954	0.3118	1.4377	5.19202	0.000190952	0.00758801	up
Unigene0014930	0.1694	0.4524	0	15.7066	6.8521	0	5.18109	0.000802196	0.0215539	up
Unigene0038614	0	0.0864	0.6778	13.9978	1.3996	12.2488	5.17699	4.91679e-06	0.000487374	up
Unigene0020073	0	0.0976	0	0.4978	1.1413	1.8806	5.17243	0.00140471	0.0321069	up
Unigene0045742	2.1097	1.2207	1.1572	99.7119	2.7457	59.1888	5.17075	7.48026e-08	1.59296e-05	up
Unigene0048902	0.129	0	0	1.7576	1.9632	0.9222	5.16961	0.000547298	0.0163861	up
Unigene0003717	0.0905	0.4836	0	3.2547	8.6651	8.6395	5.16235	4.6852e-08	1.10242e-05	up
Unigene0040749	0.0622	0.2767	0.062	8.282	0.747	5.2887	5.15841	2.15089e-07	3.8494e-05	up
Unigene0017662	0	0.0772	0	1.5088	0.2083	1.0223	5.14912	0.000288427	0.0103024	up
Unigene0041345	0.2185	1.1672	3.596	31.8372	59.5941	84.6619	5.14356	3.2798e-10	1.75944e-07	up
Unigene0000881	1.3813	1.9907	0.656	85.0465	5.6365	51.0572	5.13704	2.30051e-09	8.3383e-07	up
Unigene0052174	0	0.0608	0	1.2668	0.1641	0.7081	5.13672	0.000315893	0.0110157	up
Unigene0011066	0	0.0804	0.0901	0.1538	1.374	4.4695	5.13647	2.86304e-05	0.00184941	up
Unigene0019046	0	0.1423	0	2.9642	0	2.0378	5.1355	0.00191631	0.0400717	up
Unigene0028677	0	0.054	0	0.8722	0.1457	0.8672	5.12554	0.00249885	0.0477076	up
Unigene0008657	0.6021	0.2297	0.1716	20.8629	1.4122	12.6648	5.12191	6.23499e-08	1.38319e-05	up
Unigene0044891	0	0.0462	0.1036	1.5327	1.4556	2.227	5.12164	4.59723e-06	0.000460789	up
Unigene0011522	0.2087	0.0929	0	6.7909	0.0836	3.6171	5.12045	0.000182104	0.00733382	up
Unigene0064150	0.0511	0	0.1529	2.3976	2.5986	2.1001	5.12043	1.14501e-08	3.49671e-06	up
Unigene0035869	0	0.2367	0	2.8841	0	5.3212	5.11542	0.00208525	0.0424059	up
Unigene0046082	0.2784	0	0	1.1587	3.7901	4.676	5.11153	0.00020735	0.00806105	up
Unigene0005073	0	0.2038	0	2.556	1.0086	3.4779	5.11086	1.1127e-05	0.000906624	up
Unigene0036486	0.1665	0.778	0	18.5836	0.1333	13.6842	5.10035	0.000234787	0.00881725	up
Unigene0018850	0.1042	0	0	1.7345	1.1681	0.6702	5.09963	0.00081535	0.0218136	up
Unigene0004988	0	0.0716	0	1.0654	0.3221	1.0637	5.09738	0.000148416	0.00632122	up
Unigene0034840	0	0.0367	0.2671	2.4639	3.5232	4.3742	5.09194	9.20175e-08	1.9119e-05	up
Unigene0046814	0.5638	0.5437	1.3119	15.3602	41.1636	25.8241	5.08901	1.05566e-14	2.61244e-11	up
Unigene0028255	0	0.0645	0	0.7676	0.2321	1.1911	5.08601	0.00228878	0.0452114	up
Unigene0052660	0	0.1194	0	1.0155	1.5045	1.5345	5.08565	0.00102341	0.0257887	up
Unigene0068271	0	0	0.172	1.3052	0.8978	3.6366	5.08539	0.000112133	0.00511918	up
Unigene0013600	0	0.0735	0	1.657	0.0993	0.7382	5.08486	0.000896924	0.0234153	up
Unigene0059645	0	0.152	0	2.2609	0.2734	2.6235	5.08461	0.000540059	0.0162303	up
Unigene0025625	0	0	0.1698	1.6753	1.7047	2.3734	5.08251	7.61007e-05	0.00381267	up
Unigene0039052	0	0	0.1977	3.1124	0.0794	3.5063	5.08237	0.000626287	0.0180434	up
Unigene0015931	0.1185	0	0	0.8074	1.424	1.7792	5.08086	0.000737339	0.0203523	up
Unigene0015387	0	0	0.083	1.8899	0.2	0.714	5.07818	0.00255472	0.0484519	up
Unigene0013130	0	0.0517	0	0.9663	0.2789	0.4978	5.07526	0.000159089	0.00662023	up
Unigene0044221	0.4805	0.1069	0.2995	16.8641	0.5291	12.4071	5.07041	8.61056e-07	0.000116593	up
Unigene0046613	0.3102	0.0789	0.0442	1.9116	8.1271	4.5135	5.06973	2.82617e-09	1.01412e-06	up
Unigene0036651	0.3993	3.8214	7.7661	104.306	143.722	152.569	5.06263	5.44456e-10	2.6401e-07	up
Unigene0029763	0.7504	0.4676	0	0.3408	32.9958	7.3487	5.06192	0.000132433	0.00582539	up
Unigene0024656	0	0.0518	0	0.616	0.1862	0.9142	5.05029	0.00250429	0.0477531	up
Unigene0049283	0	0.072	0	0.6117	0.8416	0.9244	5.04543	0.00117547	0.0282324	up
Unigene0008235	0.282	0.2667	0.4687	18.0821	1.388	14.0965	5.04407	5.31346e-10	2.59639e-07	up
Unigene0042525	0.064	0.171	0.0639	5.2987	0.7266	3.8296	5.04311	1.1771e-09	4.82718e-07	up
Unigene0051523	0	0.0922	0	0.9403	0.9121	1.1841	5.0415	0.00112401	0.0275497	up
Unigene0023673	0	0	0.127	3.1794	0.8666	0.1365	5.04147	0.00103541	0.0260196	up
Unigene0048197	0.2551	0.1135	0	7.4327	0.5108	4.1937	5.04124	0.00021299	0.00819156	up
Unigene0004027	0	0.2574	0	6.7298	0.1158	1.6019	5.03644	0.000960867	0.0246277	up
Unigene0014854	0	0	0.1733	1.8415	0.9744	2.8574	5.03284	0.000189227	0.00755285	up
Unigene0061412	0.0441	0	0.044	1.8348	0	1.0397	5.02803	0.0012531	0.0296309	up
Unigene0055863	0.0646	0.0575	0	2.5436	0.2588	1.1781	5.02681	4.61186e-05	0.00261433	up
Unigene0022247	0	0.0982	0	1.0856	1.3256	0.7887	5.02616	0.0013914	0.0319231	up
Unigene0013672	0	0.1523	0	0.2591	1.028	3.67	5.02451	0.00112526	0.0275587	up
Unigene0006526	0	0	0.553	10.4206	1.6282	5.9447	5.02405	2.38425e-05	0.00161575	up
Unigene0041848	0	0.0795	0	1.1832	0.3577	1.0217	5.01051	0.000198913	0.0078092	up
Unigene0029762	0.0493	0	0	0.896	0.1975	0.4936	5.00866	0.00167498	0.0363602	up
Unigene0036047	0.3524	2.8229	6.0442	55.9475	116.266	123.966	5.00564	7.43977e-10	3.37926e-07	up
Unigene0038066	0.0952	0	0	1.5844	0.0762	1.3944	5.00407	0.000877086	0.0229978	up
Unigene0062294	0.0609	0	0.0608	2.3519	0	1.5244	4.99328	0.00132823	0.0308187	up
Unigene0006955	0	0.0535	0	0.8409	0.1684	0.6869	4.98662	0.000348625	0.011897	up
Unigene0046813	0.0333	4.6008	4.8219	64.6032	128.265	106.896	4.98646	1.11327e-06	0.000142415	up
Unigene0043107	0.0655	0.0466	0.1306	3.8264	0.2518	3.5952	4.98262	2.73994e-07	4.58493e-05	up
Unigene0027481	0	0.0834	0	0.8681	0.0375	1.7234	4.97832	0.000737262	0.0203523	up
Unigene0040174	0.1359	0	0	2.4513	0.0363	1.7809	4.97311	0.000749537	0.0206097	up
Unigene0025058	0.0785	0.0698	0	0.8314	1.6653	2.1593	4.9725	4.38164e-06	0.000443988	up
Unigene0033837	0	0.0701	0.1571	1.2515	3.7839	2.0825	4.96942	3.01557e-05	0.00191857	up
Unigene0069278	0	0.1271	0	1.0263	1.2004	1.7345	4.9619	0.000131571	0.00580007	up
Unigene0028241	0.244	0	0	4.3389	1.1723	2.0925	4.96175	3.02792e-05	0.00192303	up
Unigene0035977	0	0	0.1225	0.2325	1.8698	1.7127	4.96083	0.000426969	0.0137368	up
Unigene0025274	0	0	0.0876	0.2658	1.2659	1.1926	4.95881	0.00212167	0.0428869	up
Unigene0060592	0	0	0.1005	1.0673	1.6942	0.36	4.95697	0.00217947	0.0437883	up
Unigene0050559	1.0887	0.848	2.5786	2.0598	44.576	93.574	4.95662	1.09672e-06	0.000140553	up
Unigene0061633	0.0975	0.0434	0	1.4391	1.4838	1.4289	4.94887	1.09396e-05	0.000897246	up
Unigene0013109	0.1615	0.0411	0	4.1381	0.037	2.0778	4.94782	0.000281049	0.0101074	up
Unigene0006288	0.6804	0.424	0.2714	21.01	2.3977	18.9677	4.94488	1.92165e-08	5.51638e-06	up
Unigene0003103	0	0.0671	0.0752	2.1108	1.0263	1.2393	4.94274	6.81891e-05	0.00352669	up
Unigene0007786	0	0.136	0	1.9084	0.0612	2.1847	4.93293	0.000726124	0.0201356	up
Unigene0011053	0	0.1616	1.3581	0.3435	14.3598	31.6667	4.93133	0.000353765	0.011988	up
Unigene0042762	0.0809	0.072	0	2.5305	0.1296	2.0045	4.93109	1.34808e-05	0.00105503	up
Unigene0008154	0.2635	0.3284	0.184	7.4984	11.0374	5.0478	4.92577	4.46566e-14	7.81665e-11	up
Unigene0028458	0	0.1239	0	0.632	1.3377	1.7908	4.92368	0.00253405	0.0481618	up
Unigene0008074	0.4897	0	0	1.606	4.4449	8.8091	4.92339	2.98002e-05	0.00190609	up
Unigene0006112	0.0465	0.0828	0	2.1743	0.0932	1.6545	4.9228	2.46058e-05	0.00165035	up
Unigene0014753	0.119	0	0	1.8455	0.5716	1.1904	4.92197	0.000356888	0.0120586	up
Unigene0041568	0	0.2663	1.2359	5.6595	20.3288	19.5482	4.92187	6.52323e-07	9.19737e-05	up
Unigene0010597	0.1103	0.1963	0.1466	8.2212	0.5594	4.9399	4.92004	4.64216e-08	1.09967e-05	up
Unigene0053879	0	0	0.0932	0.8486	0.898	1.0686	4.91676	0.000980148	0.0250147	up
Unigene0044892	0	0.136	0	0.4048	1.4075	2.2939	4.91613	0.000543886	0.016318	up
Unigene0062384	0	0.1219	0	0.4145	2.1383	1.1255	4.91527	0.000500973	0.0153974	up
Unigene0028848	0	0.0338	0	0.2301	0.3958	0.394	4.91526	0.000171455	0.00703123	up
Unigene0024515	0.6024	0.1341	0.0751	14.1609	0.392	9.9299	4.91486	1.11424e-05	0.000906624	up
Unigene0012779	0	0.0625	0	1.1431	0.2813	0.4519	4.90789	0.000437427	0.0139584	up
Unigene0062116	0	0.1144	0	0.8754	1.544	1.0105	4.90601	0.00224027	0.0445238	up
Unigene0013182	0.085	0.1514	0	1.4801	2.6219	2.9781	4.90447	6.14314e-07	8.75473e-05	up
Unigene0039702	0.1009	0	0	1.7943	0.0808	1.1177	4.8905	0.00127494	0.0299499	up
Unigene0003476	0	0.1298	0	2.199	0.3169	1.325	4.88708	5.48185e-05	0.00298944	up
Unigene0010728	0.2047	0.1823	0	5.7592	0.3826	5.293	4.88495	1.05381e-05	0.000873296	up
Unigene0032035	0	0.1033	0	1.5373	0.1859	1.3275	4.88423	0.000943019	0.0243251	up
Unigene0056409	0	0	0.1424	1.6204	1.2575	1.3264	4.88384	0.00114158	0.0277707	up
Unigene0005680	0	0	0.088	1.3362	0.2121	1.0411	4.87897	0.000410497	0.0133786	up
Unigene0014439	0	0.3121	0.1166	3.096	3.4167	6.0987	4.87862	2.76945e-07	4.61143e-05	up
Unigene0040541	0	0.0976	0	1.7215	0.2195	0.9207	4.87385	0.000141951	0.00612022	up
Unigene0044389	0.0315	0.14	0.2823	7.8791	0.6298	4.7887	4.87297	3.13069e-07	5.1063e-05	up
Unigene0011811	0	0.0676	0.2273	2.0701	3.2555	3.3128	4.87247	1.35048e-07	2.59141e-05	up
Unigene0038741	0	0.1345	0	1.2579	1.8152	0.864	4.87146	0.00248874	0.0476656	up
Unigene0065702	0	0.7343	0	12.1733	0.6606	8.6475	4.87057	0.000258927	0.0095141	up
Unigene0042568	1.5974	3.0732	9.1472	229.575	21.253	152.15	4.8661	2.13875e-08	5.92625e-06	up
Unigene0029907	0	0	0.389	8.4869	0.6248	2.2304	4.86577	0.000434834	0.0139065	up
Unigene0065663	0	0	0.1079	1.3103	0.52	1.3149	4.86538	0.00188615	0.0395794	up
Unigene0048193	0.1242	0.3318	0	6.7699	0.199	6.2163	4.85374	0.000154165	0.00649284	up
Unigene0043325	0.2025	2.3432	1.7501	28.2986	38.6225	57.1929	4.8526	1.31016e-10	7.95246e-08	up
Unigene0022364	0.3297	2.4945	0	41.6672	3.6965	35.7006	4.84315	2.95294e-05	0.00189537	up
Unigene0051331	1.004	0.4206	0.5301	7.1066	22.9397	26.0034	4.84169	1.77342e-11	1.4799e-08	up
Unigene0011085	0	0.1497	0	2.3542	0.1347	1.8028	4.8414	0.00200252	0.0413323	up
Unigene0062739	0	0	0.1072	0.8951	0.9472	1.2296	4.84075	0.00134195	0.0311068	up
Unigene0005876	0	0.1207	0.1803	1.3686	3.4396	3.7808	4.83465	7.5254e-07	0.000103263	up
Unigene0049093	0.0466	0.1245	0.093	4.4282	0.1494	2.9492	4.83288	8.48556e-06	0.000738151	up
Unigene0009774	0.4205	0.0832	0	8.097	0	6.2447	4.83151	0.00172467	0.0370902	up
Unigene0060940	0	0	0.2095	3.869	1.2339	0.8009	4.81662	0.000288454	0.0103024	up
Unigene0015695	0	0	0.1134	1.2048	1.0928	0.8941	4.81483	0.00152656	0.0340371	up
Unigene0067469	0	0	0.138	0.3664	2.3265	1.1865	4.81309	0.000520895	0.0158066	up
Unigene0016970	0	0.0999	0.1119	2.2925	2.6955	0.9623	4.81219	0.000173191	0.0070741	up
Unigene0011946	0.2652	0.177	0.1322	0.6021	11.8665	3.6487	4.81041	1.64124e-06	0.000196584	up
Unigene0048499	0.4962	6.0579	0.7777	120.175	2.7365	82.2782	4.80665	2.78096e-05	0.0018045	up
Unigene0033201	0	0.1092	1.2232	3.0632	21.1191	12.931	4.79984	1.66829e-05	0.00122465	up
Unigene0048293	0.8124	0.2109	0.3038	23.7731	0.5422	12.6418	4.7995	2.50078e-06	0.000280424	up
Unigene0066632	0.259	0	0	4.0188	0.2075	2.9624	4.79471	0.0015914	0.0350547	up
Unigene0013022	0	0.071	0	1.1471	0.1917	0.6272	4.7913	0.000889611	0.0232667	up
Unigene0003597	0	1.6475	0.1154	9.1043	21.2145	18.4376	4.78957	2.15614e-06	0.000248761	up
Unigene0028756	0	0	0.1312	0.896	0.8955	1.8335	4.78814	0.000466106	0.0146504	up
Unigene0051035	0.6695	1.0037	1.1245	8.2935	39.7338	28.9892	4.78285	1.94285e-12	2.18593e-09	up
Unigene0004762	0.0254	0.0453	0	1.2896	0.1629	0.4908	4.78065	0.000179774	0.00728083	up
Unigene0029396	0	0.0757	0	1.3514	0.1703	0.547	4.77229	0.000241997	0.00901255	up
Unigene0032341	0	0.0881	0	1.1233	0.3962	0.8841	4.76991	0.000462215	0.0145425	up
Unigene0039293	0	0.2254	0	3.8773	0.2184	2.0468	4.76827	0.000332633	0.0114732	up
Unigene0030032	0	0	0.1467	0.7794	1.5318	1.6826	4.76682	0.00222505	0.0443318	up
Unigene0036597	0	0.2733	0.1531	5.1704	2.2132	4.2248	4.76682	2.2171e-06	0.000253768	up
Unigene0035616	0.3633	0	0	5.5448	0.1455	4.1982	4.76652	0.000830319	0.0220647	up
Unigene0072049	0	0.1089	0.244	2.2035	4.5462	2.8332	4.76313	4.79552e-08	1.12469e-05	up
Unigene0046274	0.103	0.0458	0	1.7145	0.1649	2.153	4.76019	7.02196e-05	0.00360543	up
Unigene0045368	0.3377	0.8016	3.1433	26.2389	46.3384	43.368	4.75881	4.07404e-10	2.10343e-07	up
Unigene0033380	0.3696	0.1645	0	6.3642	0.5921	7.3318	4.74156	7.25804e-05	0.00367715	up
Unigene0070764	0	0	0.1968	1.2694	2.3705	1.622	4.74078	0.00047941	0.0149588	up
Unigene0063622	0	0	0.1707	3.4648	0.8224	0.2447	4.73058	0.00079747	0.0214671	up
Unigene0052161	0	0.103	0	1.7946	0.2779	0.6614	4.73024	0.00128	0.0300492	up
Unigene0012167	0.0923	0.0411	0	1.9569	0.1479	1.4357	4.73012	7.98906e-05	0.00394446	up
Unigene0066061	0.1122	0	0	0.7642	1.1681	1.0425	4.72865	0.00214049	0.0431623	up
Unigene0004041	0	0.1692	0.1264	4.9384	0.1522	2.7396	4.72733	0.000101991	0.00475599	up
Unigene0005579	0	0.5332	1.7922	0.2267	31.7828	29.5432	4.72627	0.000526616	0.0159374	up
Unigene0051046	0.0589	0.1048	0	2.154	0.2987	1.88	4.72614	9.82702e-06	0.000833624	up
Unigene0010635	0	0.3211	0	2.3203	1.661	4.5118	4.7252	6.3598e-05	0.00334862	up
Unigene0027686	0	0.069	0.1545	1.0553	1.3029	3.544	4.72291	0.000143695	0.00616771	up
Unigene0001793	0	0.1031	0	1.6944	0.2782	0.745	4.72022	0.000399711	0.0131224	up
Unigene0071948	0	0.1923	0	1.717	1.8602	1.4672	4.71325	3.03519e-05	0.00192354	up
Unigene0063207	0	0	0.1864	2.3336	1.2722	1.269	4.70887	0.000611373	0.0177093	up
Unigene0025775	0	0.3052	0.4828	3.8928	9.1113	7.5118	4.7024	7.11817e-08	1.52036e-05	up
Unigene0044484	0.0557	0.0992	0	2.2351	0.0446	1.7525	4.70216	0.000510941	0.0155902	up
Unigene0048292	5.2965	4.3032	6.0788	250.244	15.419	140.828	4.69636	5.12101e-09	1.75007e-06	up
Unigene0030219	0	0.0782	0	0.9969	0.211	0.816	4.69383	0.00104387	0.0261395	up
Unigene0027657	0.1985	0	0	2.1782	1.1128	1.8444	4.69327	4.64182e-05	0.00262717	up
Unigene0048621	0	0.1063	0.4762	0.4969	6.1666	8.3195	4.68492	8.98445e-05	0.00432447	up
Unigene0017999	0.208	0.2778	0.4149	14.5237	1.7494	6.8772	4.68384	1.2173e-07	2.40663e-05	up
Unigene0002497	0.0487	0.13	0	2.6161	0.234	1.74	4.68291	4.9488e-05	0.00275567	up
Unigene0005386	0.2259	4.1221	1.239	63.8522	8.7742	70.6397	4.68048	9.44396e-07	0.000125743	up
Unigene0046901	0	0	0.2373	0.7202	3.0486	2.2957	4.6756	0.000571673	0.0168904	up
Unigene0022077	0.1179	0.2099	0.4704	0.4462	5.9963	13.9059	4.67202	2.06079e-05	0.00143587	up
Unigene0049619	4.2967	1.9795	3.1575	139.743	7.9993	92.487	4.67044	2.40434e-08	6.48684e-06	up
Unigene0046815	3.4558	13.4126	16.2675	181.127	354.602	304.654	4.66458	4.34129e-13	6.23114e-10	up
Unigene0044312	0.047	0.4188	0.0938	6.4803	0.5275	7.1629	4.66237	1.6355e-05	0.00120754	up
Unigene0002871	0	0.1932	0	2.6829	0.1545	2.0512	4.66125	0.0005381	0.0161985	up
Unigene0005715	2.6113	4.3807	2.0032	109.453	14.398	103.59	4.66019	9.16212e-10	3.91763e-07	up
Unigene0033782	0.0535	0.1428	0	3.4996	0.1713	1.2801	4.65659	0.00015498	0.00650596	up
Unigene0050648	0.8962	0.3419	2.9368	1.1628	40.2982	63.6034	4.65339	3.5704e-05	0.00216779	up
Unigene0007889	0.6159	0.7797	0.1638	20.2599	2.6087	16.3467	4.65235	7.72691e-09	2.50918e-06	up
Unigene0003567	0.1406	0	0	1.8096	0.1126	1.6085	4.65029	0.00219843	0.044009	up
Unigene0012687	0.025	0.0891	0	1.7146	0.1604	0.9662	4.63813	4.09499e-05	0.00240492	up
Unigene0036951	1.1101	0.7304	1.6366	1.7533	47.5461	37.1559	4.636	5.40895e-07	7.93822e-05	up
Unigene0061284	0	0.4715	0	2.4051	5.5852	3.7228	4.63472	3.08815e-05	0.0019492	up
Unigene0010196	0	0.504	0	7.4983	0.4534	4.5526	4.63286	0.000887825	0.0232369	up
Unigene0068835	0.3414	1.0637	0.7661	34.9475	0.957	17.9371	4.63216	6.99352e-06	0.000641812	up
Unigene0008646	0.1002	0.0446	0	2.1701	0.0903	1.3246	4.62984	9.45585e-05	0.00449409	up
Unigene0008521	0	0.0832	0	1.1315	0.2245	0.7013	4.62802	0.00129347	0.0302764	up
Unigene0000217	0.0904	0	0.1803	3.4214	1.8103	1.4541	4.62633	3.72566e-06	0.000388628	up
Unigene0037915	0.3591	0.2131	0	8.5605	0	5.5612	4.62525	0.00221553	0.0442035	up
Unigene0000802	0	0.2983	0	4.7618	0.4174	2.1822	4.62514	0.000353924	0.011988	up
Unigene0066052	0	0.7676	0.86	25.3218	0.8288	13.9918	4.62431	7.28289e-05	0.00368592	up
Unigene0000349	1.3622	4.2441	1.0189	79.3828	11.5235	72.2965	4.62256	1.20618e-08	3.65242e-06	up
Unigene0027251	0.2388	0.1063	0.2381	8.4473	0.9561	4.949	4.62116	2.92049e-06	0.0003195	up
Unigene0041363	1.099	3.587	4.8276	48.4373	103.941	81.4886	4.61955	4.42842e-13	6.23157e-10	up
Unigene0044920	0.3583	0.1595	0.5583	14.2696	1.4706	10.6761	4.61754	2.87027e-08	7.54535e-06	up
Unigene0044332	0.0435	0	0.781	11.0636	0.6969	8.3345	4.60717	0.000211358	0.00815063	up
Unigene0002187	0.0333	0.0594	0.0166	1.6025	0.1068	0.9534	4.60652	4.81144e-05	0.00269343	up
Unigene0003284	0.2786	0.2232	0.1389	9.2987	0.8479	5.4367	4.60421	1.54861e-07	2.88669e-05	up
Unigene0045016	0	0.1826	0	0.6211	1.3967	2.4197	4.60299	0.00113856	0.027736	up
Unigene0056869	0.312	0	0	4.428	2.1242	1.0037	4.59799	0.000229	0.00865423	up
Unigene0045907	5.5179	4.7174	25.9351	10.2954	365.615	496.686	4.59243	1.36176e-05	0.00105881	up
Unigene0008147	0	0	0.0465	0.0353	0.4854	0.5998	4.59077	0.00264762	0.0496885	up
Unigene0032041	0.2196	0.0977	0	4.7782	0	2.8255	4.58278	0.00247924	0.0475837	up
Unigene0041576	0	0	0.3727	2.2629	2.9934	3.6734	4.58252	7.42452e-05	0.00374306	up
Unigene0001417	0.2015	0	0	1.6772	1.7749	1.3681	4.58024	0.000786471	0.0213149	up
Unigene0001702	0.275	0.4895	1.2797	34.6124	1.3213	12.7747	4.57456	1.02871e-05	0.000860451	up
Unigene0049751	0.3554	1.3385	0.7634	30.0217	3.2186	25.2864	4.57395	1.98076e-08	5.61862e-06	up
Unigene0010183	0	0.8472	0.2664	5.598	9.2538	11.6126	4.57075	1.97352e-06	0.000230111	up
Unigene0048283	0	0	0.4978	0.3778	5.597	5.7802	4.56156	0.000902202	0.0235189	up
Unigene0052810	0	0.2118	0.0791	2.6707	2.0959	2.0973	4.56043	1.59058e-06	0.000190886	up
Unigene0017849	0.0697	0	0	0.8973	0.1676	0.5733	4.55481	0.0010994	0.0270884	up
Unigene0059064	0	0.1838	0	1.5623	1.4879	1.2542	4.5496	0.000651225	0.0185681	up
Unigene0027821	0.1609	0	0.1605	3.9572	1.6106	1.955	4.54883	3.76281e-05	0.00225223	up
Unigene0062141	1.177	0.1048	0.9391	31.6224	2.6394	17.4991	4.54265	4.70102e-06	0.000469226	up
Unigene0032097	0	0.0703	0.2364	1.4353	3.2909	2.4005	4.53833	3.11714e-06	0.000336398	up
Unigene0070370	0	0.2631	0	1.1184	3.0771	1.9013	4.53437	0.00105627	0.026376	up
Unigene0048381	0	0.0821	0	1.0127	0.2956	0.5937	4.53399	0.00126385	0.0298217	up
Unigene0034565	0.7233	2.2939	0.1803	40.5098	3.8017	29.6967	4.53267	1.64354e-06	0.000196584	up
Unigene0053535	0.189	0	0.1885	0.7151	2.9514	5.0656	4.53178	0.000178829	0.00725485	up
Unigene0034194	0	0.8344	0.4006	20.0917	0.2145	8.2317	4.5303	0.000484198	0.0150559	up
Unigene0043277	0.4662	0.4565	0.3255	16.1778	1.6989	10.9638	4.53018	6.0297e-09	2.02209e-06	up
Unigene0045731	0.9584	0.5214	0.3717	21.1559	2.388	19.0675	4.52447	6.45714e-08	1.40735e-05	up
Unigene0046114	0	0.2075	0.186	4.9045	0.1307	4.0156	4.52361	0.000170259	0.00700621	up
Unigene0026523	0	0.0629	0	0.6955	0.1699	0.5811	4.52336	0.00164805	0.0359714	up
Unigene0041893	0.1514	0.1348	0	2.9227	0.7277	2.9227	4.52148	0.000136025	0.00593126	up
Unigene0006828	0	0	0.2356	0.6257	1.9865	2.7861	4.51809	0.00103864	0.0260627	up
Unigene0006521	0.1149	0	0.3437	1.565	4.5082	4.4341	4.51801	7.42708e-05	0.00374306	up
Unigene0050588	0.0672	0.9472	0.067	13.7573	0.3588	10.6476	4.51725	0.000131711	0.00580007	up
Unigene0048047	0.3024	0.1514	0.0754	6.6221	0.6811	4.7819	4.51327	3.14991e-07	5.126e-05	up
Unigene0000383	0	0	0.5043	1.7222	3.1051	6.6871	4.51301	0.00012395	0.00554924	up
Unigene0046845	0.3578	0.7166	0.0892	15.1984	1.0746	10.1983	4.50776	3.84594e-06	0.00039828	up
Unigene0070718	0	0	0.1945	0.738	1.3537	2.3234	4.5046	0.000491447	0.0152515	up
Unigene0026980	0	0	1.0026	14.2952	0.5932	7.8663	4.50435	0.00119608	0.028603	up
Unigene0061300	0	0	0.1779	2.1606	1.429	0.4464	4.50379	0.00122007	0.0289932	up
Unigene0003683	0	0.1826	0.1023	3.2219	0.0822	3.153	4.50236	0.000843121	0.0223324	up
Unigene0047092	0	0.7963	0.2974	2.1438	10.1492	12.4681	4.50079	3.67735e-05	0.00220956	up
Unigene0027032	0.6029	0.6133	0.6012	11.3736	15.4157	14.1893	4.49492	1.30193e-14	3.11448e-11	up
Unigene0019644	0.1861	0.1657	0.0464	4.3838	0.3726	4.2068	4.49245	3.42168e-06	0.000362718	up
Unigene0030115	0	0.1405	0	1.344	0.1264	1.6784	4.48616	0.000568241	0.0168091	up
Unigene0005581	0.1605	0.3572	0.8804	0.7288	13.8184	16.7496	4.48448	2.48563e-05	0.00166289	up
Unigene0017277	0	0	0.6988	7.4902	0.5612	7.575	4.48296	0.00063613	0.0182829	up
Unigene0008824	0.3727	0	2.3542	0.5642	32.7361	27.6181	4.48154	0.000711287	0.0198238	up
Unigene0009196	1.759	1.5658	1.1015	60.6812	7.044	31.0533	4.48002	1.28228e-09	5.16988e-07	up
Unigene0049750	0.6207	2.3483	0.4643	42.1812	3.687	30.5584	4.47641	3.07131e-07	5.03341e-05	up
Unigene0007770	0.1563	0.0927	0.1039	4.3954	0.1251	3.3322	4.47586	3.55897e-05	0.00216505	up
Unigene0018976	0	0.1911	0	2.6809	0.8597	0.6905	4.46863	0.000416321	0.0134909	up
Unigene0034394	0.3999	0.2932	0.0469	4.7534	6.82	4.8089	4.46847	6.23471e-10	2.96318e-07	up
Unigene0011840	0	0.0639	0	0.6252	0.1726	0.6161	4.46772	0.00192061	0.0401147	up
Unigene0022773	0	0	0.1951	0.5181	2.8197	0.9787	4.46758	0.00170593	0.036825	up
Unigene0039061	0	0.2204	0	2.7167	0.1322	2.0055	4.4611	0.00117227	0.0282028	up
Unigene0045367	1.4934	5.6244	1.9477	34.0812	85.2886	80.2248	4.46054	5.01628e-11	3.39621e-08	up
Unigene0007673	1.5815	0.3705	0.249	32.285	0.7333	15.3501	4.45783	3.04209e-05	0.00192521	up
Unigene0058028	0.1513	0.0898	0.2515	5.8409	0.404	4.5791	4.45767	3.01093e-06	0.000326902	up
Unigene0044620	0	0.5798	0	1.7746	5.8426	5.1213	4.4575	0.000120363	0.00542587	up
Unigene0049803	0.0634	0.0753	0.0843	2.8634	0.1354	1.8583	4.44498	3.3587e-05	0.00207257	up
Unigene0037466	0	0.1469	0.1234	0.7494	2.7427	2.3889	4.44343	1.90264e-05	0.00136273	up
Unigene0043656	0	0	0.8275	8.4773	0.5696	8.9385	4.44192	0.000875593	0.0229754	up
Unigene0038458	0	0.0821	0.1841	1.3968	2.1433	2.2427	4.44119	9.30664e-06	0.000797017	up
Unigene0057040	0.2962	0.3296	0.8862	0.1121	22.2396	10.4801	4.44056	0.00025469	0.00938941	up
Unigene0046422	0.1978	0.2289	0.0789	5.9875	0.3643	4.5947	4.43633	5.12826e-07	7.58834e-05	up
Unigene0029587	0	0.124	0	1.6608	0.2232	0.7967	4.4342	0.000801845	0.0215539	up
Unigene0028597	0.0988	0.5277	0.9854	18.2084	2.2553	14.3722	4.43374	1.02766e-06	0.000133678	up
Unigene0062734	0	0.2066	0	1.8447	1.2085	1.4104	4.4333	0.00112591	0.0275587	up
Unigene0037816	0	0.1238	0	1.7194	0.2228	0.7291	4.43146	0.000457329	0.014428	up
Unigene0050555	1.1719	0.2608	2.5565	3.8801	17.5975	64.5498	4.43062	6.58213e-06	0.000614725	up
Unigene0035755	0.1586	0.2118	0.1582	3.661	5.0174	2.7208	4.43061	1.00117e-06	0.000131353	up
Unigene0046748	0.6408	1.3822	0.1966	25.9466	0.6317	21.2817	4.43045	2.02568e-05	0.00142541	up
Unigene0064213	0.3581	1.1423	1.2798	11.9708	20.3642	27.4969	4.42765	4.12327e-12	4.35162e-09	up
Unigene0016138	0	0.1409	0.1052	0.7983	2.8302	1.6588	4.42521	6.77142e-05	0.00351379	up
Unigene0003634	0	2.2119	0.7322	14.3176	19.2219	29.5072	4.42052	1.91713e-06	0.000224444	up
Unigene0047684	0.0857	0.1907	0.0641	3.519	0.4462	3.3236	4.41995	1.85717e-07	3.38279e-05	up
Unigene0002206	0	0.2266	0.3809	2.9385	4.7919	5.2322	4.41533	1.18902e-06	0.000149441	up
Unigene0008417	0	0.2235	0.5946	3.396	7.5646	6.4821	4.4142	8.34396e-07	0.000113261	up
Unigene0037817	0.045	0.0802	0	1.4823	0.1082	1.0782	4.41383	0.000344623	0.0117772	up
Unigene0003236	0	0.1551	0	1.4507	0.4187	1.4324	4.41198	0.0003994	0.0131182	up
Unigene0044492	0.3031	0.4947	0	8.2202	0.1618	8.5942	4.41134	0.00046188	0.0145383	up
Unigene0010942	0	0	0.0938	0.9614	0.2261	0.8071	4.41037	0.00148901	0.0335034	up
Unigene0051039	0.4725	0.3154	0.589	2.3242	15.0409	11.9041	4.40989	1.80463e-06	0.000213011	up
Unigene0049735	0.4684	0.8802	1.1729	10.9645	26.0236	16.5749	4.40888	4.41201e-14	7.81665e-11	up
Unigene0029961	0	0.1756	0	1.344	1.1852	1.1989	4.40808	0.00106916	0.0265868	up
Unigene0045067	0	0.1832	0	0.8566	1.9778	1.0297	4.39864	0.00169781	0.0366782	up
Unigene0044894	0	0.6539	0.3663	0.278	9.4617	11.6385	4.38922	0.000357285	0.0120663	up
Unigene0017106	0.1285	0	0	1.2645	0.4632	0.9646	4.389	0.00108664	0.0268723	up
Unigene0005208	1.4558	8.2885	7.2595	88.8087	149.752	117.262	4.38723	2.22271e-11	1.7923e-08	up
Unigene0010169	0	0.1121	0	1.3027	0.2017	0.8402	4.38648	0.00141209	0.032192	up
Unigene0038745	0.1618	0.1584	0.1291	2.0942	3.3566	3.9441	4.38613	2.46343e-11	1.90097e-08	up
Unigene0050554	2.5101	1.4219	6.9032	36.7853	90.4044	99.1163	4.38448	2.29842e-10	1.26884e-07	up
Unigene0046425	0.2233	0.3975	0.8906	18.2482	1.6092	11.6893	4.38353	1.32373e-06	0.000164632	up
Unigene0029059	0	0.2461	0	2.6154	0.4428	2.0749	4.38251	0.000385963	0.0127999	up
Unigene0047671	0.0621	0.1291	0	2.5003	0.0746	1.3917	4.37475	0.000261743	0.00957403	up
Unigene0049371	0.0545	0.0485	0.0906	2.4555	0.2038	1.3447	4.37029	1.32783e-06	0.000164632	up
Unigene0064427	0	0.2065	0.0463	0.9481	1.6721	2.5536	4.35516	6.75419e-05	0.00350993	up
Unigene0035021	0	2.4906	8.3105	52.6614	82.2039	86.1481	4.35488	0.000141992	0.00612022	up
Unigene0037130	0	0.0774	0	0.7892	0.1392	0.6522	4.35199	0.000796692	0.0214542	up
Unigene0048675	0	0.0985	0.0662	1.616	0.2481	1.4946	4.34999	2.02591e-05	0.00142541	up
Unigene0004737	0.3206	0.1427	0.0799	7.5524	0.321	3.1798	4.34684	5.06525e-05	0.00280922	up
Unigene0071141	0	0.0589	0.132	0.8012	1.6957	1.3715	4.34085	0.000406763	0.0132871	up
Unigene0005578	0	0.1767	3.2662	0.4507	34.8933	34.3341	4.33901	0.00232368	0.045663	up
Unigene0045913	0.0501	0.4239	0.3999	2.3614	6.8744	8.4193	4.33647	1.95608e-08	5.57065e-06	up
Unigene0023359	0.0374	0.0665	0	1.0743	0.0598	0.9612	4.33389	0.00198646	0.0410554	up
Unigene0050629	0.0449	1.009	0.1791	15.1014	1.1864	8.5673	4.3333	2.71738e-05	0.00178434	up
Unigene0030759	0	0.0948	0.0531	2.176	0.3411	0.4567	4.32961	0.000301909	0.0106262	up
Unigene0009149	0	0.1693	0	1.7037	0.4063	1.2918	4.32864	0.000307091	0.0107769	up
Unigene0029799	0.1483	0.4289	0	6.1995	0.1781	5.2193	4.32852	0.000397369	0.0130575	up
Unigene0031245	0.9751	1.7361	7.9259	6.8634	76.3401	130.236	4.32665	8.34782e-06	0.00073149	up
Unigene0034199	0	0.0447	0.0501	0.9318	0.322	0.6466	4.32527	0.00018706	0.0074862	up
Unigene0056392	0	0.0805	0.0902	1.5054	0.9414	0.9694	4.32286	0.000757903	0.0207999	up
Unigene0049435	0	0.3686	0	1.4417	3.7811	2.1313	4.31842	0.000264975	0.00966271	up
Unigene0038989	2.4071	1.728	0.1549	51.7143	2.0522	31.803	4.31805	3.24108e-05	0.00201734	up
Unigene0061189	0.0608	0.0541	0.0606	0.8278	1.7521	0.9122	4.31455	0.000300294	0.0105824	up
Unigene0004228	0.8138	0.4829	0.4509	20.4431	1.9552	12.344	4.31325	3.22632e-08	8.41194e-06	up
Unigene0015377	0	0.2715	0	1.6155	1.5875	2.1797	4.30931	0.00163061	0.0357426	up
Unigene0003230	0.1254	0.0558	0	1.6846	0.5022	1.3893	4.30273	5.84386e-05	0.00313915	up
Unigene0042858	0	0.8584	2.3906	13.9811	24.7582	25.3754	4.30259	7.73543e-05	0.0038498	up
Unigene0032836	0.1048	0.6532	0	7.4574	0.2938	7.1931	4.30125	0.000551469	0.0164492	up
Unigene0028759	0.1266	0.1127	0	3.353	0.9124	0.4524	4.30122	0.000855381	0.0225688	up
Unigene0024378	0.0948	0.1265	0.189	0.7889	2.9218	4.3687	4.2995	7.01927e-06	0.000642894	up
Unigene0048284	0.1518	0	2.7248	2.4698	20.7873	33.0364	4.29053	0.000597512	0.0173889	up
Unigene0070066	0	0	0.15	1.1954	0.6626	1.0752	4.28944	0.00117816	0.0282523	up
Unigene0058659	0	0.0509	0.114	0.4325	1.2357	1.5522	4.28758	0.000874343	0.0229594	up
Unigene0048712	0.0413	0.3859	0.1441	6.0695	0.3059	4.7585	4.28457	1.47358e-05	0.00112145	up
Unigene0015074	0.0491	0.0438	0	1.0043	0.1181	0.6851	4.28217	0.000805202	0.0216184	up
Unigene0052421	0.5367	0.7963	0.5353	9.1393	13.2536	13.9387	4.28143	7.30441e-10	3.36031e-07	up
Unigene0041108	0.1124	3.4262	4.0907	33.3816	56.9485	57.9146	4.28029	1.00997e-06	0.000132265	up
Unigene0007709	0.7185	0.9594	0.4478	26.1007	1.2947	13.8984	4.27992	1.68096e-06	0.000199729	up
Unigene0060924	0.0423	0.1506	0.1055	2.353	1.6431	1.799	4.27951	3.80721e-08	9.6547e-06	up
Unigene0000898	0	0.0968	0.2169	0.9875	3.3527	1.7487	4.27872	6.66763e-05	0.00347501	up
Unigene0055583	0	0.1497	0	1.3362	0.606	0.9615	4.27775	0.00226954	0.0449437	up
Unigene0032659	0.1268	0	0	1.0558	0.4063	0.9972	4.27762	0.00155225	0.0344569	up
Unigene0011376	0.2123	0	0.2823	2.678	2.3805	4.502	4.27275	1.03231e-05	0.000862457	up
Unigene0037581	0.12	0.0854	0	2.5605	0.0384	1.3549	4.26673	0.00110912	0.0273059	up
Unigene0050574	0.0443	0.2462	0.1434	4.3037	0.3456	3.701	4.26639	2.89585e-06	0.00031797	up
Unigene0041813	0.0673	0.1797	0	2.6227	0.4311	1.6834	4.26145	0.000117463	0.00532189	up
Unigene0006489	0	0.2871	4.6107	0.8951	35.0457	57.9447	4.2607	0.0022265	0.0443359	up
Unigene0061062	0.1169	0	0.0583	1.4595	1.2637	0.6266	4.257	0.000537937	0.0161985	up
Unigene0007012	0.0338	0.0904	0	1.2296	0.2711	0.871	4.25518	0.000336319	0.0115759	up
Unigene0049996	3.6378	0.8863	1.1075	68.9159	3.6802	34.8982	4.25457	2.26916e-06	0.000257904	up
Unigene0048196	0.126	1.0658	0.0419	15.6582	0.7402	7.1316	4.25344	0.000145554	0.00623633	up
Unigene0071340	0	0.2389	0	2.1325	1.0746	1.3427	4.25132	0.00246939	0.0475235	up
Unigene0005118	0.6552	1.9246	7.3834	3.818	82.5378	102.839	4.24712	4.04679e-05	0.00238442	up
Unigene0041729	0.797	18.8965	32.7316	219.765	369.328	404.452	4.24426	2.26186e-06	0.000257658	up
Unigene0044187	0	0.2502	0.0934	2.0565	2.4764	1.9423	4.23612	0.000217545	0.00831771	up
Unigene0048779	0.7589	0.1351	8.0229	0.8041	64.4285	101.876	4.2281	0.00170614	0.036825	up
Unigene0033426	0	0.1016	0	0.7772	0.5483	0.5709	4.22229	0.00242196	0.0469846	up
Unigene0046846	0.0953	0.3393	0	5.3731	0.0763	2.6566	4.22123	0.00174655	0.0374717	up
Unigene0040079	0.0286	0.0764	0.0285	1.4723	0.2979	0.7157	4.21886	1.03741e-05	0.000865024	up
Unigene0025266	0	0.2756	0	0.5859	2.6452	1.8813	4.21335	0.000545906	0.0163595	up
Unigene0033448	0	0.1275	0	1.3547	0.1147	0.8956	4.21327	0.00249497	0.0476969	up
Unigene0065103	0	0.3143	0	1.6034	3.205	1.0096	4.21031	0.00151345	0.0338683	up
Unigene0015129	0	0	0.438	1.3296	3.6495	3.1002	4.20523	0.000324188	0.0112503	up
Unigene0000033	0.0847	3.6948	3.8861	32.0543	67.435	41.415	4.20017	1.02168e-06	0.000133313	up
Unigene0067633	0	0.0858	0.1442	2.1885	1.2352	0.7923	4.19617	0.000143059	0.00615883	up
Unigene0022297	0.1364	0.1214	0	2.838	0.3276	1.5595	4.19602	0.0011198	0.0274936	up
Unigene0026080	0.2595	0	0	0.9821	1.7668	1.9942	4.19202	0.000580277	0.0170603	up
Unigene0043309	0.3237	0.4322	0.5303	5.0652	9.8871	8.5515	4.19171	4.80648e-14	8.2129e-11	up
Unigene0038988	3.344	1.0543	0.8337	53.3839	2.1202	40.0864	4.19143	7.38173e-06	0.000665574	up
Unigene0029628	0.1068	0.2377	0.0533	3.3755	0.2995	3.5698	4.18683	3.34572e-05	0.00206634	up
Unigene0037260	0.2298	0	0	1.6519	0.644	1.8886	4.1866	0.00233447	0.0458499	up
Unigene0043162	0.178	0.6864	0.1183	10.6958	0.0713	7.0914	4.18372	0.000321073	0.0111638	up
Unigene0064687	0.0908	0	0.2716	2.0612	2.7265	1.7845	4.18072	2.242e-05	0.00154118	up
Unigene0030693	0.1568	0.1116	0	2.4913	0.3264	2.0392	4.17758	0.000125709	0.00561046	up
Unigene0030978	0.1017	0	0.1014	1.154	0.4071	2.1071	4.17481	0.00222312	0.0443055	up
Unigene0048611	0	0.3922	0.5021	1.7623	7.2078	7.1527	4.1722	1.7748e-05	0.00129048	up
Unigene0006548	0.2898	0	0.1445	4.6059	0.5802	2.6411	4.17173	0.000305375	0.0107309	up
Unigene0042800	0.2104	0.2248	0	5.2478	0.1264	2.4669	4.17131	0.00052912	0.0159886	up
Unigene0043250	1.6166	4.42	2.2456	33.6455	60.6669	54.6811	4.16909	8.867e-13	1.09715e-09	up
Unigene0033069	0	0.2458	0.1377	1.0447	2.8745	2.9601	4.16496	0.000664082	0.0188448	up
Unigene0044761	0	1.8468	1.7776	11.9416	32.2245	20.8442	4.16485	2.73759e-05	0.00179094	up
Unigene0001380	0	0.2844	0	1.1605	2.2004	1.7355	4.16349	0.000369434	0.012366	up
Unigene0011694	0	0.2056	0	1.5075	0.0925	2.0841	4.1634	0.00248868	0.0476656	up
Unigene0002082	0.07	0.187	0	2.385	0.3365	1.8771	4.16135	0.000249866	0.00926232	up
Unigene0060877	0.2282	0.1016	0	3.454	0.2741	2.1612	4.15843	0.000699152	0.0195998	up
Unigene0035467	0	0.1219	0.0683	1.5802	0.2741	1.5414	4.15812	0.00034452	0.0117772	up
Unigene0027524	0.1013	0.0902	0	1.0738	1.5421	0.7968	4.1555	0.00155502	0.0344969	up
Unigene0036532	0.1256	0.5592	0.1253	9.6033	0.5534	4.2656	4.15406	0.000110168	0.00505198	up
Unigene0042148	0.1345	0.0479	1.0731	5.0082	8.7469	8.5564	4.15145	3.24361e-06	0.000347434	up
Unigene0046359	0	0.1413	0	1.4616	0.2542	0.7942	4.15085	0.000881022	0.0230757	up
Unigene0027469	0.1037	0.2771	0.3449	2.1461	5.013	5.6606	4.14285	6.81155e-08	1.46798e-05	up
Unigene0038357	0.3273	1.544	4.4714	9.0403	47.2308	55.7205	4.14215	2.0532e-06	0.00023843	up
Unigene0004452	0.0692	0.4823	0.6553	3.4635	8.7705	9.0306	4.1392	2.77317e-08	7.31688e-06	up
Unigene0045396	0	0.1398	1.5135	3.2476	10.6246	15.0932	4.13091	0.000231841	0.00873474	up
Unigene0037449	0	1.3476	1.1125	7.7789	18.6973	16.5733	4.12921	2.54545e-06	0.000284454	up
Unigene0022383	0	0.0585	0.2624	0.9458	2.2651	2.3977	4.12745	0.000255924	0.00942362	up
Unigene0052196	0.5872	0	0	1.7776	5.5259	2.9381	4.12445	0.000513325	0.015643	up
Unigene0010651	0.3138	0	0.0626	1.2349	3.8702	1.4579	4.12402	6.11145e-05	0.00324277	up
Unigene0004917	0.5796	0.6449	0.289	0.1097	11.3729	14.8627	4.12159	0.000399994	0.0131257	up
Unigene0036665	0	0.3788	0.0943	2.2006	3.105	2.9232	4.12046	7.19032e-06	0.000654848	up
Unigene0047986	0.0895	0.1706	0.102	3.3076	0.4298	2.5576	4.11975	6.4714e-08	1.40735e-05	up
Unigene0045634	0.1711	0.1523	0.0853	4.1448	0.2056	2.7525	4.11929	0.000146155	0.00625459	up
Unigene0049333	0.0582	0.0906	0.0725	2.2018	0.1049	1.5389	4.11913	5.02109e-05	0.00278904	up
Unigene0011897	0.2585	3.337	8.5086	40.1105	83.6246	86.2299	4.11658	2.62332e-06	0.000291884	up
Unigene0035315	0.0808	0.072	0	1.5293	0.1295	0.9822	4.11137	0.00204527	0.0418963	up
Unigene0000972	0.128	0.171	0.1277	1.6472	2.6148	3.1115	4.11106	9.57823e-06	0.000815411	up
Unigene0039193	0.9289	0	3.4998	10.936	27.8574	37.6994	4.11037	3.37276e-05	0.00207768	up
Unigene0042937	0	0.3228	0	1.7153	1.5248	2.3329	4.10974	0.00067465	0.0190713	up
Unigene0048057	0.119	0	0.2373	4.2312	0.8098	1.1053	4.10855	0.000350895	0.011959	up
Unigene0048231	0.1885	1.7413	0.3604	24.1028	1.0507	14.3357	4.10791	3.67921e-05	0.00220956	up
Unigene0069611	0.1743	0	0.0869	0.8572	1.4654	2.1797	4.10744	0.00100681	0.0254776	up
Unigene0022888	3.9426	6.0987	1.547	105.755	9.2657	84.405	4.10511	4.65409e-07	7.0317e-05	up
Unigene0034235	0.1424	0.2536	3.7645	0.6468	30.2308	40.6746	4.10417	0.00115093	0.0279046	up
Unigene0004056	0	0.6589	0.2349	3.3612	4.6617	7.335	4.10289	6.39433e-06	0.000603016	up
Unigene0048032	0.0963	0.2286	0.1281	3.9842	0.2828	3.4876	4.09747	7.36543e-06	0.000665574	up
Unigene0019023	0	0.0438	0.0981	1.5634	0.4333	0.4219	4.09123	0.0024681	0.0475235	up
Unigene0039329	0.4747	1.7782	2.9982	19.6989	28.8138	40.9562	4.09069	9.17095e-10	3.91763e-07	up
Unigene0027236	0.0929	0.4756	0.7414	3.0239	9.3769	9.913	4.09041	7.70392e-08	1.63574e-05	up
Unigene0039166	0.0731	0.0651	0	1.604	0.1756	0.5746	4.09041	0.00191971	0.0401114	up
Unigene0015672	0.1511	0.0673	0.0753	1.5438	1.2707	2.1871	4.08997	4.63447e-06	0.000463874	up
Unigene0006722	0	0.1595	0.2085	1.2886	2.5119	2.4554	4.08744	8.36201e-06	0.000731662	up
Unigene0010889	1.0361	0.6917	0.1722	17.4148	1.4522	13.4235	4.08704	5.94294e-06	0.000572485	up
Unigene0007029	0	0.3187	0	1.3131	2.1836	1.9095	4.08434	0.000300072	0.0105823	up
Unigene0013237	0	0.2293	0.0642	1.9978	1.1344	1.8409	4.08271	0.000282406	0.0101336	up
Unigene0028744	0.0375	2.2341	3.8852	22.6371	35.8656	45.7721	4.08207	2.51079e-05	0.00167307	up
Unigene0052943	0	0.3503	1.3735	19.4311	0.3151	9.4221	4.08074	0.00163942	0.0358703	up
Unigene0013773	0	0.111	0	0.9595	0.0999	0.8171	4.07941	0.00207997	0.0423825	up
Unigene0033144	0	0.2222	0	2.2671	0.1499	1.3383	4.079	0.00228138	0.0451407	up
Unigene0000852	0	0.0499	0.3357	1.1038	2.9651	2.4458	4.07852	0.000151264	0.00641205	up
Unigene0042866	0.1761	0.1567	0	0.5331	2.8205	2.2656	4.07764	0.00111852	0.0274866	up
Unigene0041948	0.0884	0.0394	0.0441	1.2719	0.425	1.2012	4.07547	1.49178e-05	0.0011317	up
Unigene0039695	0	1.1019	0.3703	2.6933	11.6483	10.4623	4.07452	4.49134e-05	0.0025622	up
Unigene0016494	1.4078	5.5745	8.7629	51.8211	100.483	111.922	4.06879	1.05822e-09	4.38983e-07	up
Unigene0040508	8.6644	8.4911	50.6569	17.9875	521.075	598.576	4.06835	6.23446e-05	0.00330201	up
Unigene0062696	0.1997	0.2666	0	1.9645	3.9978	1.8554	4.06741	0.00025071	0.00928403	up
Unigene0031466	0.0985	0.3069	0	3.8211	0.1578	2.8167	4.06718	0.000595925	0.0173686	up
Unigene0038012	0.0654	0.2328	0	3.1177	0.3142	1.5658	4.06691	0.000424091	0.0136604	up
Unigene0042026	3.4039	0.5865	0.7665	47.367	3.1218	29.1571	4.06551	1.1071e-05	0.000906119	up
Unigene0006706	0.4982	0	0.2208	7.2265	0.3768	4.4116	4.06269	0.000387337	0.0128258	up
Unigene0028070	0	0	1.2148	8.3323	8.4424	3.5162	4.06204	0.000871473	0.0229092	up
Unigene0045017	0.6697	1.6258	1.7	13.4768	30.3273	22.7587	4.05827	9.37134e-12	8.51321e-09	up
Unigene0045558	1.1384	1.2836	0.7947	11.9468	20.5442	21.0749	4.05766	5.95875e-13	7.77519e-10	up
Unigene0047682	0.981	0.7035	0.924	25.717	2.4007	15.2511	4.05537	9.7377e-08	1.98533e-05	up
Unigene0022499	0	0	0.3112	3.7392	0.4165	1.0037	4.05129	0.00238633	0.0466348	up
Unigene0041262	0	0.4119	0.9229	1.6341	6.4848	14.0004	4.05061	0.000110588	0.0050678	up
Unigene0019251	0	0	0.2641	1.6034	0.9191	1.8298	4.04262	0.00225257	0.0447187	up
Unigene0021039	0.1027	0.503	0.9222	4.432	9.9563	10.7585	4.04075	4.8699e-08	1.13316e-05	up
Unigene0012972	0	0.1788	0.2003	3.7815	0.3217	2.1357	4.04064	0.000194208	0.00766641	up
Unigene0021657	0.0884	0.0787	0	1.4048	0.4248	0.9161	4.03839	7.79181e-05	0.00386713	up
Unigene0044811	1.0285	0.8979	2.4854	13.6964	36.5123	22.2382	4.03748	5.10225e-11	3.42213e-08	up
Unigene0063059	0	0.2495	0	1.4143	0.6735	2.0037	4.03552	0.00242501	0.0470106	up
Unigene0047734	0.065	0.1446	0.0216	2.3444	0.0781	1.3626	4.03312	0.000162972	0.00676059	up
Unigene0047670	0	0.1065	0.0596	1.4934	0.0718	1.154	4.03306	0.0020453	0.0418963	up
Unigene0017540	0.0399	0.1954	0.0796	2.7335	0.3995	2.0112	4.02998	1.74349e-05	0.00127287	up
Unigene0030724	0	0.4083	0.4575	0.9113	6.8886	6.2709	4.02253	0.000117625	0.00532571	up
Unigene0039907	0.2153	2.0124	4.5307	25.9248	31.3488	52.1864	4.01758	7.66851e-07	0.000105026	up
Unigene0008319	0	0.1721	0	1.4632	0.3871	0.9328	4.01537	0.00184482	0.0389626	up
Unigene0017061	0	0.2523	0.0942	1.2872	2.0433	2.2626	4.01272	7.08466e-05	0.00362652	up
Unigene0027139	0.2431	0	0.1212	1.3797	2.1415	2.3456	4.00937	0.0011265	0.0275636	up
Unigene0039446	0.13	0.3472	0.2593	0.492	4.8941	6.459	4.00746	0.000123716	0.00554219	up
Unigene0049144	0.3513	0.6253	0.05	7.6902	0.7636	8.0522	4.00704	2.50672e-05	0.00167191	up
Unigene0007328	0.0314	0.1119	0.0314	1.4395	0.0378	1.3258	4.00407	0.00062542	0.0180329	up
Unigene0004078	1.9691	0.8661	0.3466	30.1208	1.4657	19.4566	4.0038	1.24798e-05	0.000994031	up
Unigene0018998	0	0.1351	0.1514	1.321	2.1274	1.1392	4.00113	0.000582117	0.0170934	up
Unigene0008423	0.0591	0.2105	0	2.5946	0.4261	1.2886	3.99856	0.000299075	0.0105575	up
Unigene0041904	0	1.7145	1.1205	8.3206	18.703	18.241	3.99696	7.4587e-06	0.000670778	up
Unigene0007100	0	0.2739	0.0767	1.3975	1.6021	2.5847	3.99348	0.000466448	0.0146504	up
Unigene0048778	0.2329	1.1405	12.8938	1.4104	82.0889	143.696	3.99316	0.00240651	0.04688	up
Unigene0044387	0.1364	0.1821	0	3.1734	0.1638	1.7301	3.99185	0.00078337	0.0212641	up
Unigene0026547	1.0665	2.6221	5.065	32.3632	54.1377	52.7279	3.99144	1.32552e-10	7.95246e-08	up
Unigene0060856	0	0.0876	0.0491	1.3215	0.0788	0.7735	3.99113	0.00190335	0.039847	up
Unigene0012504	0.408	6.4857	1.337	83.8809	3.6645	43.1838	3.98942	0.000118049	0.00533528	up
Unigene0045750	1.3921	2.7173	4.1149	25.3743	67.9562	37.2005	3.98836	2.54238e-11	1.94102e-08	up
Unigene0039083	0.3063	0.3	0	4.8456	0.687	4.0728	3.98574	7.83228e-05	0.0038828	up
Unigene0061467	0.2366	0.5793	0	7.3878	0.5686	4.9688	3.98565	0.00029562	0.0104871	up
Unigene0004686	0	0.4188	0.0938	1.7091	2.5999	3.8	3.98362	6.46819e-05	0.00339821	up
Unigene0034550	6.6301	12.9019	10.7641	104.154	202.822	172.248	3.9835	1.84826e-14	3.6845e-11	up
Unigene0006148	0.5	0	0.1662	6.9696	0.2002	3.3657	3.98316	0.00126892	0.0298868	up
Unigene0040766	0	3.8752	8.066	41.5591	72.2253	74.3954	3.97809	0.000547164	0.0163861	up
Unigene0025438	0	0.1711	0.0959	1.0911	0.8468	2.2672	3.97723	0.00127267	0.029926	up
Unigene0036689	0.1846	0.1409	0.1841	4.3709	0.6759	2.9217	3.96687	2.89764e-06	0.00031797	up
Unigene0005189	0	0.0718	0.4021	0.4882	2.7447	4.1499	3.96151	0.000504915	0.0154853	up
Unigene0048289	0.1133	0.807	6.9508	12.9079	41.6142	67.8812	3.95893	0.000157301	0.0065713	up
Unigene0005617	0.7214	0.6422	0	11.1921	0.8666	9.1096	3.95641	0.000413558	0.0134357	up
Unigene0036133	0	0.9877	1.1065	6.3538	13.9215	12.2133	3.95546	1.11149e-05	0.000906624	up
Unigene0037021	0	0.0934	0	0.5955	0.2521	0.5999	3.954	0.00170868	0.0368466	up
Unigene0037866	0.4827	0	0	4.1399	2.1905	1.15	3.95392	0.0012026	0.0287207	up
Unigene0039751	0.0363	0.113	0	1.0572	0.3342	0.9207	3.95292	0.00016752	0.00690932	up
Unigene0005117	1.1284	2.5569	13.4021	9.3163	116.828	138.437	3.9527	5.82649e-05	0.00313216	up
Unigene0044173	0	0.2215	0.0993	2.8626	0.1993	1.9032	3.95208	0.000500551	0.015391	up
Unigene0038173	0.0474	0.3379	0.5678	1.9749	6.4219	6.308	3.94752	5.91291e-06	0.000570358	up
Unigene0020274	0.2292	0.2721	0	5.0601	0.1224	2.5397	3.94527	0.00153401	0.0341257	up
Unigene0043943	0.2792	0.0621	0.0696	4.1211	0.1118	2.0958	3.94505	0.000742705	0.0204453	up
Unigene0027658	0.4323	0	0	3.4024	1.2463	2.0084	3.94479	0.000768519	0.020963	up
Unigene0025104	0	0	0.301	2.8842	0.6951	1.0519	3.94355	0.00117275	0.0282049	up
Unigene0039278	0	2.6178	0.1988	21.8411	0.8383	20.6282	3.94259	0.00241886	0.0469562	up
Unigene0043279	1.3336	1.735	1.8415	18.8268	28.0567	28.5966	3.94227	3.25179e-13	4.86183e-10	up
Unigene0004247	0.2267	0.4237	0	4.9916	0.6535	4.3418	3.94064	0.000136037	0.00593126	up
Unigene0050654	0.4116	0.3664	2.3603	3.1928	19.7783	25.1539	3.93873	2.76006e-05	0.00179908	up
Unigene0002516	0.794	0.7068	0.066	13.019	0.6359	10.357	3.93786	0.000194699	0.00768157	up
Unigene0014315	0	0.2739	0.0767	0.5823	2.2799	2.5022	3.93552	0.000260562	0.00954544	up
Unigene0061707	0	0.0698	0.1563	0.7711	0.7219	1.9607	3.93311	0.000344568	0.0117772	up
Unigene0028605	1.9732	0.2745	0.4305	18.9469	1.6791	20.2748	3.93279	4.20221e-05	0.00245383	up
Unigene0006349	0	0.5226	0.8364	2.9195	12.123	5.6646	3.92951	3.55984e-05	0.00216505	up
Unigene0060631	0.0945	4.458	11.0257	47.8778	88.8831	100.265	3.92744	6.28816e-05	0.00332065	up
Unigene0034842	0.1593	0.3545	0.7307	4.1106	6.6462	8.1632	3.92627	1.84503e-09	6.82526e-07	up
Unigene0054750	0.2246	0.1	0.1867	2.8192	2.5036	2.4352	3.92344	7.02162e-09	2.31153e-06	up
Unigene0023549	0.0814	0.2174	0	0.6162	1.6954	2.2115	3.92006	0.00105812	0.0264037	up
Unigene0040116	0.1076	0.2554	0	3.3243	0.4595	1.7044	3.91829	0.00015638	0.00654282	up
Unigene0068205	0	0.2133	0.9558	4.3521	5.8528	7.45	3.9166	3.20003e-05	0.00199783	up
Unigene0030740	0	0	0.4599	2.7481	1.431	2.7603	3.91542	0.000862031	0.0226942	up
Unigene0047210	0.1718	0.2485	0.0428	4.047	0.2064	2.7323	3.91501	0.000130732	0.00577971	up
Unigene0043243	0.0223	0.1783	0.0222	1.5577	0.1247	1.67	3.91137	0.000279032	0.0100477	up
Unigene0029850	0	0	0.3402	0.6885	2.2312	2.1945	3.91005	0.00139049	0.0319124	up
Unigene0052755	0.1145	0.2038	0	1.5596	1.8338	1.3912	3.90994	0.00106526	0.0265265	up
Unigene0000537	0	0.1978	0.3693	2.5779	2.6094	3.3346	3.9095	5.90343e-05	0.00316168	up
Unigene0016210	0.2621	0.2333	0	2.6775	3.3582	1.4049	3.90875	0.00099923	0.0253574	up
Unigene0039034	3.1392	5.7086	7.7374	14.085	136.015	98.505	3.90589	1.33718e-07	2.57968e-05	up
Unigene0042365	0.1305	1.3362	0.6509	4.2476	9.1991	18.2861	3.90547	3.79797e-06	0.000393881	up
Unigene0037318	0.3313	0	0	2.382	1.3267	1.2433	3.9018	0.00198934	0.0410959	up
Unigene0028457	0.1681	0.1497	0.0838	1.8452	1.616	2.5239	3.89754	0.000161702	0.00671959	up
Unigene0011592	0.0687	0.0612	0	1.0144	0.1101	0.8107	3.89701	0.000700334	0.0196252	up
Unigene0039715	0	0.2837	0	1.0854	1.6591	1.4808	3.89662	0.0016473	0.0359659	up
Unigene0005503	0	0.0639	0.0716	0.2718	1.1793	0.5648	3.89506	0.00188282	0.0395239	up
Unigene0049373	1.4469	3.1806	0.8246	19.1855	32.5058	29.2749	3.89244	7.6474e-11	4.94435e-08	up
Unigene0032689	0.1326	0.1475	0.1983	3.788	0.3451	2.9616	3.89045	5.1465e-05	0.00284111	up
Unigene0042492	0.156	0.1852	0.0519	3.3456	0.0417	2.4349	3.8886	0.000920872	0.0239107	up
Unigene0045413	0.4449	1.9009	0.4437	23.1985	1.8528	16.1543	3.88476	1.35756e-05	0.00105784	up
Unigene0043984	0	0.1583	0.3902	1.6422	3.1766	3.28	3.88414	1.83114e-05	0.00132074	up
Unigene0029155	0.1831	0.5978	0.3044	2.3331	5.7447	7.9415	3.88365	1.43649e-07	2.71292e-05	up
Unigene0005424	0	0.2735	0.664	2.5387	5.1885	6.0949	3.88201	2.38988e-05	0.00161652	up
Unigene0037665	0	0.1222	0.2464	1.1218	1.9566	2.3545	3.88159	3.26263e-05	0.00202377	up
Unigene0071750	0.2506	0.1394	0.1874	5.523	1.48	1.5	3.88033	3.89052e-06	0.000401371	up
Unigene0033716	3.4458	16.8396	7.8909	124.043	117.646	173.243	3.88032	1.7412e-10	1.02425e-07	up
Unigene0017575	0	0.6439	0.6312	10.2985	1.0138	7.4646	3.88028	0.000207039	0.00805599	up
Unigene0066638	0.2111	0.1722	0.193	2.5693	3.0711	2.8415	3.8795	1.0146e-09	4.2581e-07	up
Unigene0052308	0	0	0.2645	1.7058	1.3804	0.8056	3.8791	0.00217526	0.0437161	up
Unigene0010252	0	0.1561	0.2624	1.9911	1.7208	2.4447	3.87883	3.43312e-05	0.00210654	up
Unigene0030552	0	0.1636	0.0917	0.9042	0.8096	2.0364	3.8767	0.00188295	0.0395239	up
Unigene0010640	1.0891	1.0664	0.6517	24.2743	1.5264	15.4139	3.87595	5.51659e-06	0.000537183	up
Unigene0040230	0	0.0878	0.1968	0.8213	1.5803	1.763	3.87117	0.00263445	0.0495192	up
Unigene0035419	0.1995	0.0888	0.0995	1.2646	1.7178	2.6919	3.87106	1.33053e-06	0.000164632	up
Unigene0008139	0	0.3211	0.06	1.0464	1.637	2.879	3.86747	0.000561679	0.0166553	up
Unigene0031334	0.2463	1.7178	0.2866	18.7684	1.0851	12.9717	3.86636	8.99614e-05	0.00432719	up
Unigene0018912	0	0.4211	0	0.9248	1.0734	4.1418	3.866	0.00216528	0.0435823	up
Unigene0006348	0.2108	0.0704	0.473	3.2307	5.1072	2.6558	3.86559	4.52824e-07	6.908e-05	up
Unigene0043326	0	2.3956	0.4536	8.3189	13.9336	19.1817	3.86219	0.000136315	0.00593764	up
Unigene0003183	0	0.2739	0	1.1645	1.5405	1.2648	3.85735	0.00177375	0.0379224	up
Unigene0068548	0.2482	0.1473	0.495	2.0347	5.0352	5.8243	3.85596	1.08597e-06	0.00013967	up
Unigene0035817	0	0.0945	0	0.4419	0.4676	0.4553	3.85223	0.001829	0.03871	up
Unigene0042581	0.8506	1.5616	0.9543	24.7031	2.3843	21.5072	3.85147	1.38261e-06	0.000170196	up
Unigene0035210	0	0.2347	0	0.8479	1.1612	1.3661	3.84608	0.00203623	0.0418236	up
Unigene0019477	0.069	0.2458	0	2.6118	0.1106	1.8008	3.84484	0.00231577	0.0455563	up
Unigene0050553	0.6044	2.0848	3.7674	9.4915	45.5624	37.6398	3.84362	4.79523e-07	7.21457e-05	up
Unigene0003967	0.4137	0.3541	0.5078	4.8775	6.5762	6.8474	3.84268	2.1698e-12	2.39566e-09	up
Unigene0021916	0.0672	0.0598	0.2682	1.3228	2.2612	2.0662	3.83765	0.000153126	0.00646048	up
Unigene0041261	0.5751	0.9507	0.71	1.7201	15.0666	15.1496	3.83633	4.54334e-07	6.908e-05	up
Unigene0037146	1.4658	2.1078	0.7309	40.0646	3.4316	17.9325	3.835	2.15949e-06	0.000248761	up
Unigene0021353	0.727	0.9245	0.4143	4.5587	15.5537	9.3533	3.83426	4.88736e-08	1.13316e-05	up
Unigene0039709	0	0.4775	0.8497	0.3344	11.4488	7.1277	3.83276	0.00121534	0.0289435	up
Unigene0032851	0.2995	0.5332	0	3.2867	2.0389	6.5295	3.83157	0.000640632	0.0183609	up
Unigene0034899	2.9592	8.8375	13.5056	98.4538	178.289	82.604	3.82804	6.51615e-10	3.05646e-07	up
Unigene0029808	0	0.3576	0.1002	1.2161	2.4131	2.8715	3.82781	0.00111284	0.0273787	up
Unigene0043506	0.0375	0.0835	0.0748	1.4767	0.5109	0.7912	3.82701	2.23901e-05	0.0015406	up
Unigene0041288	0.1318	0.129	0.0263	1.9344	0.1055	2.0342	3.82686	0.000197786	0.00777344	up
Unigene0043598	0.1355	0.3619	0.1352	4.7355	0.3799	3.8428	3.82384	3.12061e-05	0.00196278	up
Unigene0011779	0.2684	0.7835	0.0642	8.7413	0.4642	6.5525	3.81955	9.73883e-05	0.00459679	up
Unigene0051429	0.8161	0.4775	1.0305	8.8334	9.4374	14.4959	3.81749	2.33959e-13	3.65006e-10	up
Unigene0023313	0.0275	0.0245	0	0.1559	0.154	0.4222	3.81546	0.00192775	0.0402288	up
Unigene0010842	0.053	0.0825	0	1.1521	0.0424	0.7002	3.8056	0.00186913	0.0393373	up
Unigene0043317	0.1621	0.4328	0.5656	4.1239	6.5541	5.531	3.80398	2.26152e-09	8.2386e-07	up
Unigene0002438	0.0217	2.4683	3.6403	16.952	31.2982	37.3709	3.80394	0.000186481	0.00746818	up
Unigene0019642	0.2324	0.7586	0.309	10.7001	1.1789	6.2573	3.8023	1.11342e-05	0.000906624	up
Unigene0056696	0	0.1392	0.2339	1.2427	2.5049	1.4532	3.8011	0.000674723	0.0190713	up
Unigene0040501	0.0927	0	0.1848	1.0519	1.4843	1.3247	3.79838	0.00234882	0.0460436	up
Unigene0033307	0.1673	0.6702	0	6.8691	0.737	4.036	3.79712	0.000567192	0.0167995	up
Unigene0045234	1.3155	1.6851	0.096	27.7788	0.3597	14.8725	3.79595	0.000792845	0.0214094	up
Unigene0039685	0.5297	4.204	2.9492	5.6119	51.3272	49.5948	3.79352	8.28395e-06	0.000727669	up
Unigene0022841	0	0.0482	0.3243	0.9433	2.0833	2.1304	3.79122	0.000498452	0.0153527	up
Unigene0013023	0.0813	0.0724	0	0.8462	0.0977	1.1771	3.78656	0.00134702	0.0311768	up
Unigene0011752	0.5241	0.4082	0.2614	9.8672	0.6297	5.9709	3.78614	1.97819e-05	0.0014084	up
Unigene0054500	0.0862	0.1727	0.344	1.4847	3.4531	3.3747	3.78529	4.52923e-07	6.908e-05	up
Unigene0011011	0.1094	0.073	0.0545	2.0483	0.1971	1.0161	3.78319	0.000311683	0.0108992	up
Unigene0010833	0	0.1597	0.1431	2.4708	0.5172	1.1796	3.78278	0.000365269	0.0122438	up
Unigene0046291	0.1722	0.2453	1.0991	3.8445	9.7091	7.2744	3.77961	3.32632e-07	5.34042e-05	up
Unigene0044790	0.0323	7.1124	6.7747	40.4185	67.1507	83.3997	3.77817	0.000228861	0.00865354	up
Unigene0039905	0	0.1409	0.9468	5.0295	5.7026	4.1847	3.77759	0.000352662	0.0119838	up
Unigene0015232	0.5373	1.4646	1.7748	4.2693	22.2669	25.2492	3.77735	2.24425e-07	3.99655e-05	up
Unigene0047052	0	0.5193	0.2909	1.8607	4.7724	4.4678	3.77625	4.59167e-05	0.00260701	up
Unigene0053880	2.7571	0.409	0.6874	29.5602	2.9442	20.282	3.77592	6.31787e-05	0.00333363	up
Unigene0033058	0.0417	0.2597	0.2078	1.8922	1.8022	3.2764	3.77502	1.64194e-05	0.00121106	up
Unigene0004731	0.1579	0.1405	0.3149	1.2544	4.4881	2.6516	3.77471	9.71719e-05	0.00459246	up
Unigene0047758	0	0.5301	0.4454	3.455	4.4908	5.3913	3.77316	1.51452e-05	0.00114291	up
Unigene0050808	0.0497	0.0443	0.0992	1.3173	0.0797	1.2442	3.77303	0.000874702	0.0229605	up
Unigene0056684	0.4885	0	0	3.8204	1.6302	1.2221	3.77184	0.00227825	0.0450913	up
Unigene0000475	0	0.1977	0.696	3.1089	3.3153	5.7817	3.77164	7.47126e-05	0.00376005	up
Unigene0033487	0.1945	0.2943	0	3.9442	0.3115	2.4186	3.7713	0.000497453	0.0153375	up
Unigene0058201	0	0	0.3045	2.443	1.1179	0.5924	3.76974	0.00223685	0.0444803	up
Unigene0001296	0.124	0.423	0.1648	4.8475	0.7612	4.0983	3.76948	1.01849e-06	0.000133139	up
Unigene0004784	0	0.0564	0.1684	1.5338	0.0676	1.4637	3.76922	0.00254708	0.0483454	up
Unigene0025704	0.1956	0.0871	0.0488	2.9976	0.7049	0.8039	3.76489	0.000453513	0.0143378	up
Unigene0008344	0.0394	0.0701	0.0393	0.9535	0.1261	0.9428	3.76462	0.000404022	0.0132277	up
Unigene0044743	0.198	0.2518	0.0846	3.7781	0.2039	3.2751	3.7634	5.64242e-05	0.00305841	up
Unigene0011099	0	0.1045	0.039	1.1109	0.1097	0.7274	3.76287	0.00171676	0.0369664	up
Unigene0009741	1.9627	1.3501	0.5338	30.2484	1.8577	20.0872	3.76221	1.14942e-05	0.000933138	up
Unigene0041525	4.3657	9.2793	3.4209	58.8318	51.4832	120.491	3.75749	2.09695e-10	1.18496e-07	up
Unigene0038675	0.0299	0.1331	0.7156	1.8441	5.2079	4.8296	3.75738	2.57968e-05	0.00171174	up
Unigene0030230	0	0.129	0.1445	1.2611	0.9864	1.45	3.75694	0.00140824	0.0321401	up
Unigene0070943	0	0	0.326	1.4533	1.6689	1.285	3.75692	0.00128855	0.0301906	up
Unigene0005615	0.5136	0.4858	0.1921	10.5678	0.8227	4.7036	3.75568	2.00881e-05	0.00142069	up
Unigene0006188	0.9572	1.2587	1.0197	16.7765	15.9241	10.9934	3.75533	4.54558e-13	6.27343e-10	up
Unigene0022352	0	0.2103	0.1178	1.1621	1.3244	1.9418	3.75455	0.00212438	0.0429217	up
Unigene0025725	0	0.1584	0.1775	2.2895	1.2827	0.954	3.7522	0.0019538	0.040639	up
Unigene0014321	0.2305	0.8551	2.3376	7.4155	18.4642	20.2144	3.75116	8.64828e-07	0.000116884	up
Unigene0020918	1.5879	8.7903	1.2867	106.393	3.1793	47.2449	3.74884	0.000202582	0.00790996	up
Unigene0024949	0.3135	0.0698	0	2.3726	1.8831	0.8963	3.74859	0.00127223	0.029926	up
Unigene0037967	0.0828	0.2212	0	0.6268	1.3267	2.1313	3.74812	0.00187474	0.0394205	up
Unigene0043002	0.8044	0.549	0.1605	13.556	0.2362	6.5357	3.74712	0.000311792	0.0108992	up
Unigene0048903	0.2335	0	0.3105	1.826	2.3063	3.171	3.74687	0.000185729	0.00745159	up
Unigene0005790	0.4678	0.6841	2.2325	8.2938	19.2126	17.8873	3.74552	4.64286e-08	1.09967e-05	up
Unigene0026970	0.082	0.146	0	1.8621	0.1971	0.9966	3.74444	0.0025452	0.0483454	up
Unigene0001963	0	0.1042	0.4668	1.8893	1.9993	3.7639	3.74437	0.000134153	0.00586534	up
Unigene0042847	0.7381	0.5476	0.0818	11.5762	0.2627	6.4779	3.74355	0.000559247	0.0166208	up
Unigene0066508	0	0.0954	0.0713	1.1355	0.2289	0.8682	3.7434	0.00201117	0.0414394	up
Unigene0037952	0.2013	1.2905	2.9318	10.8649	25.1078	23.2575	3.74304	1.25491e-06	0.000156899	up
Unigene0016789	0	0.176	0.0657	1.5212	0.7917	0.9186	3.74091	0.000329671	0.0114075	up
Unigene0003000	0.732	0.1133	0.127	7.4306	0.3441	5.2208	3.74047	0.000183669	0.0073803	up
Unigene0044887	0	0.2543	0.114	2.0327	0.2746	2.6142	3.74014	0.00220386	0.0440685	up
Unigene0034981	0	0.2297	0.1287	1.6599	1.6533	1.4755	3.73999	0.00189953	0.0397904	up
Unigene0046084	0.3396	1.168	2.5556	11.3208	22.971	19.9166	3.73783	4.67289e-08	1.10242e-05	up
Unigene0043415	0.1928	0.2288	0.1282	0.2675	0.1544	6.9129	3.73778	0.00255768	0.0484825	up
Unigene0071177	0	0.0537	0.3008	2.0547	1.7637	0.9056	3.73615	0.00026239	0.00958791	up
Unigene0055326	0	0.0604	0.1015	1.3091	0.2173	0.6303	3.73565	0.00232311	0.045663	up
Unigene0036664	0.2723	0.3151	0	1.8752	2.5513	3.3864	3.73344	2.48625e-05	0.00166289	up
Unigene0054998	0.0948	0.0281	0.2207	1.8185	1.3926	1.3559	3.73244	2.91781e-05	0.00187971	up
Unigene0043266	0.1378	0.2146	0.0687	3.1278	0.5241	1.9448	3.73234	9.31338e-05	0.00445887	up
Unigene0007909	0.321	0.8572	1.2805	19.9209	2.2495	10.4972	3.73189	1.8128e-05	0.00131279	up
Unigene0043146	0.8072	0.9381	0.9839	3.5976	15.9289	16.7327	3.7318	8.57469e-09	2.699e-06	up
Unigene0019393	0	0.2563	0.1436	1.4709	2.652	1.1834	3.73	0.000696575	0.0195581	up
Unigene0027301	0.4211	0.1249	0	2.0182	1.3489	3.8624	3.72692	0.000415623	0.0134783	up
Unigene0014560	0.1303	0.116	0	1.331	0.626	1.3036	3.72665	0.00197279	0.0408717	up
Unigene0046036	0.0965	0.1719	0.0481	3.3241	0.3479	0.5175	3.7265	0.00191749	0.0400847	up
Unigene0068675	0.2457	0.2917	0.7353	2.8828	7.479	6.47	3.72523	5.04524e-07	7.48092e-05	up
Unigene0031206	0	0.2857	0.4802	2.1864	4.499	3.4417	3.72492	0.000920897	0.0239107	up
Unigene0043684	2.0102	1.603	0	26.8608	1.0565	19.8013	3.7232	0.00234529	0.0459994	up
Unigene0029810	1.5009	2.2045	4.6776	23.6832	39.9676	46.9887	3.72226	2.6145e-10	1.4323e-07	up
Unigene0048821	0.281	0.5783	0.1518	8.1153	0.4828	4.7444	3.72203	1.08742e-05	0.0008929	up
Unigene0035789	0.3531	0.5343	0.6339	3.6076	8.6535	7.7989	3.72095	1.58389e-08	4.66851e-06	up
Unigene0051515	0	0.142	0.0796	1.2075	0.5111	1.1974	3.71796	0.00079049	0.0213816	up
Unigene0012647	0.1209	0.2153	0.2929	2.0268	2.6291	3.6185	3.71729	4.45917e-10	2.26962e-07	up
Unigene0046812	7.3258	12.5848	25.2508	142.984	230.775	220.112	3.71699	1.17054e-10	7.24181e-08	up
Unigene0000311	0.3694	0.6577	0.4421	6.1231	6.8939	6.2848	3.71563	2.6724e-09	9.63758e-07	up
Unigene0041584	0.267	0.0297	0.0333	2.2356	0.0802	2.016	3.71443	0.00122267	0.0290394	up
Unigene0044556	0	0.1995	0.0497	1.602	0.1197	1.5486	3.71405	0.00224203	0.0445465	up
Unigene0036190	0.1305	0.1743	0.2603	2.3708	2.6134	2.4257	3.71288	1.99245e-05	0.00141294	up
Unigene0033392	0	0.2118	0.1582	0.9002	2.477	1.4738	3.71269	0.00135628	0.0313782	up
Unigene0020384	0.0919	0.5727	0.1833	1.565	3.5698	5.9779	3.71217	2.74807e-05	0.00179289	up
Unigene0064646	0.1481	0.1318	0.0739	3.0263	0.1779	1.4291	3.71103	0.000606601	0.0175911	up
Unigene0048616	0	0.4296	0.4814	1.9177	2.3676	7.5899	3.70436	0.000222707	0.00848345	up
Unigene0056956	0.1446	0	0.1442	1.8055	0.8106	1.1368	3.69986	0.00167726	0.0363987	up
Unigene0043869	0	1.2883	1.2371	1.5256	9.1069	22.1668	3.69908	0.000683521	0.0192821	up
Unigene0043845	0.1352	0.0401	0.0899	2.3699	0.0541	1.0145	3.69663	0.00147939	0.0333252	up
Unigene0014711	0.1708	0.4865	0.0681	6.4114	0.6566	2.3196	3.69391	0.000155083	0.00650596	up
Unigene0037148	0	0.6182	0.1385	5.4664	0.445	3.8721	3.69256	0.00193721	0.0403558	up
Unigene0045004	1.0505	0.6772	0.9393	10.747	11.4599	12.2734	3.69248	2.34899e-11	1.83236e-08	up
Unigene0041136	0.0761	18.0212	26.7367	105.364	231.153	243.035	3.69227	0.000868686	0.0228443	up
Unigene0058134	0.1269	0.0565	0.0633	2.1136	0.2288	0.8393	3.68897	0.00060138	0.017459	up
Unigene0068329	0.2259	0.3016	0	2.3934	2.7137	1.6954	3.68882	0.000996785	0.0253222	up
Unigene0036706	0	1.8447	1.6792	24.6029	1.7634	19.0243	3.68715	0.000740644	0.0204043	up
Unigene0047620	0.4094	4.66	7.3792	31.1639	62.4675	66.1409	3.68196	3.02217e-06	0.000327627	up
Unigene0027453	0.0829	0.812	0.0827	6.4958	0.6974	5.3052	3.67636	0.000427754	0.0137368	up
Unigene0028540	0	0.035	0.0392	0.2677	0.3148	0.3652	3.67494	0.00183395	0.0387674	up
Unigene0047174	0.1103	0.1963	0	1.9609	0.3974	1.5564	3.67447	0.000419503	0.0135735	up
Unigene0044773	0	0.2251	0.804	2.0338	5.368	5.7174	3.67222	0.000215805	0.0082865	up
Unigene0015874	0.3603	0.1782	0	3.8171	1.3465	1.6881	3.66944	0.00019052	0.00758278	up
Unigene0040927	0	0.5422	0.2336	0.9219	3.9398	4.9897	3.66657	0.000395561	0.013016	up
Unigene0000878	0	0.4524	0	1.2822	2.578	1.877	3.66468	0.00225384	0.0447309	up
Unigene0010877	0.4091	0	0.0907	3.4744	1.4561	1.397	3.66221	0.000451508	0.0142996	up
Unigene0041676	0.042	0.187	0.0838	1.9553	0.1682	1.8317	3.66044	0.000365114	0.0122438	up
Unigene0030581	0.1586	1.1295	0.1582	10.743	0.5716	6.9721	3.66036	0.000941864	0.0243081	up
Unigene0000336	0.3626	0.1614	0.2712	0.2745	4.7196	5.0546	3.65955	0.00106099	0.0264387	up
Unigene0047978	0.3288	0.7421	0.4801	6.0691	7.9365	5.5726	3.65798	2.65996e-11	2.00942e-08	up
Unigene0000808	2.3672	0.6938	0.3167	24.1417	1.9421	16.5488	3.65784	3.9854e-05	0.00235306	up
Unigene0051987	0	0.3091	0.2078	1.5768	2.5586	2.3828	3.65652	0.000296638	0.0105077	up
Unigene0010299	0.3217	0.2454	0.0917	5.06	0.2208	3.0218	3.65565	0.000200365	0.00784474	up
Unigene0035530	0.3869	2.342	11.4987	30.1599	59.6804	89.1883	3.65343	4.69802e-05	0.00264853	up
Unigene0015364	0	0	0.4402	1.5449	2.2977	1.6958	3.65324	0.00206031	0.0420535	up
Unigene0004811	0.5434	0.8356	0.739	3.8137	9.8124	12.995	3.6518	1.12324e-07	2.24623e-05	up
Unigene0006856	0	0.2648	0.4451	0.6755	3.8124	4.4126	3.6482	0.000811084	0.0217357	up
Unigene0030918	0.1215	1.136	1.2121	17.8445	0.6814	12.3795	3.64551	0.000427804	0.0137368	up
Unigene0041565	0	0.4353	0.2529	2.5223	3.1333	2.9518	3.64468	3.33309e-05	0.00206031	up
Unigene0037133	0	0.382	0.9986	1.4074	5.7855	10.0714	3.64442	0.000549231	0.0164302	up
Unigene0043042	0.3453	0.2635	0.1968	5.8427	0.6321	3.5966	3.64406	1.37127e-05	0.00106092	up
Unigene0047548	0.0379	0.3205	0.0378	3.0981	0.2429	1.612	3.644	0.000639074	0.0183382	up
Unigene0040323	0.738	1.3139	1.5389	8.8347	19.961	16.0887	3.64384	4.0332e-10	2.09744e-07	up
Unigene0029002	0.3371	0.8253	0.8406	1.3714	13.8715	9.6993	3.63835	1.06291e-05	0.000876963	up
Unigene0035225	1.3015	10.4268	19.8464	88.1715	157.36	147.194	3.63668	1.52161e-06	0.000183277	up
Unigene0046917	0.1085	0.3862	0.1082	4.905	0.2172	2.3648	3.6344	0.000400388	0.0131326	up
Unigene0027359	0.1344	0	0.1341	0.8649	1.5075	0.961	3.634	0.0019542	0.040639	up
Unigene0061861	0.1229	0.1094	0.1225	1.1624	1.9682	1.2735	3.63377	0.00026619	0.00969225	up
Unigene0018681	0.3063	1.2726	0.2037	12.7128	0.2453	9.1602	3.63319	0.000988232	0.0251673	up
Unigene0023145	0.2814	0.2505	1.1848	3.7619	7.1232	10.3797	3.63076	3.071e-07	5.03341e-05	up
Unigene0049828	8.323	10.2584	3.8646	152.552	10.5789	114.43	3.62827	3.33495e-06	0.000356686	up
Unigene0008230	0.1094	0.073	0	0.8897	0.1314	1.2311	3.62616	0.00241333	0.0469266	up
Unigene0046579	0	0.8014	0.133	2.5236	1.5489	7.4601	3.62553	0.00070306	0.0196674	up
Unigene0022042	0	0.3016	0.3942	1.5813	3.7992	3.1889	3.62245	0.000177282	0.00720432	up
Unigene0008277	0.0371	0.1816	0.0493	1.5256	0.1931	1.5778	3.62063	4.10626e-05	0.00240956	up
Unigene0002420	0.1678	0.651	0.0239	5.7162	0.7105	3.9333	3.61986	0.000188869	0.00754489	up
Unigene0006289	0	0.189	0.6352	2.0085	4.931	3.1868	3.61897	0.00056186	0.0166553	up
Unigene0036213	0.2241	0.8178	2.3688	8.9711	18.341	14.5753	3.61838	8.81856e-07	0.000118738	up
Unigene0069586	0.1173	0	0.2339	2.5742	0.5636	1.1737	3.61783	0.00161349	0.0354543	up
Unigene0033308	0.8283	6.0212	1.0555	60.0722	2.1006	34.6665	3.61476	0.000296896	0.0105116	up
Unigene0034038	0.1241	0.0276	0	0.9159	0.2982	0.6432	3.61391	0.00244602	0.0472503	up
Unigene0047784	4.0167	3.8171	2.3818	76.9005	9.8246	38.3324	3.61375	2.20593e-07	3.93808e-05	up
Unigene0039397	0.2288	2.0654	2.5909	10.4615	23.6332	25.6939	3.61341	1.27825e-06	0.000159539	up
Unigene0045811	0.0813	0.5067	0	3.3696	0.6838	3.1388	3.61255	0.000727822	0.0201749	up
Unigene0052523	0.3666	0.1632	0	1.5954	2.1287	2.7515	3.61149	0.000795457	0.0214451	up
Unigene0045752	0.1094	0.1299	0	1.698	0.1753	1.0431	3.6073	0.0010863	0.0268723	up
Unigene0011042	0.0732	0.1304	0.073	1.9955	0.1173	1.2564	3.60653	0.00163572	0.0358113	up
Unigene0045918	0.351	0.2795	0.0553	4.3756	0.5622	3.4064	3.60491	4.07619e-05	0.00239584	up
Unigene0009838	2.093	2.1789	0.9694	34.0749	3.1707	26.4519	3.60324	1.09675e-06	0.000140553	up
Unigene0028291	0.0665	1.2429	1.4589	6.5921	13.2597	13.7827	3.60287	6.91375e-06	0.000635304	up
Unigene0047348	5.2584	26.8642	14.3646	165.482	197.722	200.678	3.60049	1.56e-09	6.01908e-07	up
Unigene0018658	0.0587	0.1985	0.4448	3.1712	2.82	2.5168	3.59928	3.09211e-07	5.05486e-05	up
Unigene0064602	0.1263	0.7873	0.126	6.6934	1.1131	4.7864	3.59851	0.000290094	0.0103371	up
Unigene0056316	0.1848	1.1516	0	4.6158	10.5094	1.0568	3.59797	0.00200733	0.0413841	up
Unigene0023844	0	0.1057	0.2368	2.4264	0.951	0.7639	3.59591	0.00163109	0.0357426	up
Unigene0047754	0.2976	0.2385	0.1484	4.4827	0.2861	3.4998	3.59452	3.60907e-05	0.0021796	up
Unigene0027442	1.3942	7.0742	10.5118	50.0566	76.7776	102.346	3.59392	9.69874e-08	1.98533e-05	up
Unigene0044893	0	0.0276	0.5251	0.6798	1.9845	4.0073	3.59346	0.00212578	0.042926	up
Unigene0007921	0.2101	0.3117	0.2794	5.777	0.3365	3.554	3.59291	0.000145704	0.00623903	up
Unigene0013533	0	0.1543	0.2593	1.1152	1.9785	1.8897	3.59082	0.000215929	0.00828683	up
Unigene0031284	0	0.3531	0.0565	1.5438	1.7245	1.6606	3.58898	0.00094783	0.0243806	up
Unigene0044617	0.012	0.6642	1.4882	4.2987	9.8547	11.8789	3.58826	0.00028035	0.0100901	up
Unigene0002382	0.2236	0.3484	4.7951	8.547	24.5371	31.45	3.58785	0.000210204	0.00812817	up
Unigene0047895	0.078	0.2082	0.1166	2.9355	0.3122	1.5883	3.58568	9.7975e-05	0.00461673	up
Unigene0048398	0.1062	0.441	0.0706	4.0705	0.2834	3.0604	3.5851	0.000688868	0.0193796	up
Unigene0003997	0.827	1.5902	0.066	15.8231	1.7486	12.1777	3.58259	0.000153792	0.00648095	up
Unigene0032249	0	0.3739	0.2394	2.7703	1.2976	3.2599	3.57872	0.000295537	0.0104871	up
Unigene0045931	0.2225	10.539	16.2314	66.5609	125.618	129.759	3.57613	0.000161616	0.00671959	up
Unigene0038294	0.1729	3.8095	0.2587	29.64	2.2157	18.7244	3.57606	0.000941963	0.0243081	up
Unigene0029805	0.4716	1.2595	1.6462	5.4879	17.9418	16.8135	3.5748	4.1942e-07	6.55776e-05	up
Unigene0040499	0.4347	0.1935	0	4.1672	0.2611	3.0554	3.57446	0.00164565	0.0359518	up
Unigene0067685	0.1575	0.5608	0	4.7477	0.7358	3.0581	3.57185	0.000637187	0.0182914	up
Unigene0032569	6.282	12.1342	23.0225	106.233	200.49	185.605	3.57057	6.10546e-10	2.9211e-07	up
Unigene0015288	0.2267	0.6053	0	6.5183	1.0891	2.2681	3.5692	0.00240623	0.04688	up
Unigene0003555	0	0.2756	0.3088	1.1717	3.4305	2.3239	3.56702	0.000251905	0.00931387	up
Unigene0023472	0.0718	0.0958	0.0716	0.7059	0.7183	1.4104	3.56686	0.000263937	0.00962973	up
Unigene0036131	0.1458	1.4281	3.0545	5.6293	15.36	33.7243	3.56331	7.65551e-05	0.00382594	up
Unigene0030046	0.343	0	0.2737	4.309	1.6482	1.3239	3.56152	0.000754959	0.0207349	up
Unigene0012680	0.376	0.526	0.5357	4.7563	8.5393	3.6666	3.56049	1.58726e-08	4.66851e-06	up
Unigene0045631	0	0.1502	0.3787	0.7025	3.2441	2.2922	3.5602	0.000662473	0.0188215	up
Unigene0025442	0	0.5948	0.5998	2.2252	6.315	5.5405	3.55912	0.000151875	0.00642658	up
Unigene0006675	0.3503	0.1559	0	3.1817	0.7716	2.0033	3.55671	0.00203395	0.0418008	up
Unigene0040448	0	0.0772	0.2161	0.8856	1.076	1.487	3.55556	0.000705057	0.019696	up
Unigene0047091	1.7684	2.5089	4.2438	20.5355	37.5762	41.7526	3.55086	5.14941e-10	2.55784e-07	up
Unigene0036916	0.1458	0.0649	0.0727	0.7175	0.9345	1.668	3.55027	0.00230536	0.0454524	up
Unigene0027659	0.4524	0	0.0645	3.4241	1.32	1.2936	3.54604	0.000842678	0.0223324	up
Unigene0043045	0.0795	0.5661	1.1099	4.2713	8.2124	8.0113	3.54532	6.783e-06	0.000627286	up
Unigene0070575	0	0.2619	0.1258	0.9544	2.4576	1.1117	3.54449	0.000596549	0.017375	up
Unigene0053890	9.0881	15.0617	8.0319	107.252	123.972	144.232	3.54433	1.94939e-12	2.18593e-09	up
Unigene0047403	0	0.7626	0.3286	3.3417	3.5891	5.7941	3.54367	0.00017112	0.00702811	up
Unigene0009062	0.1901	0.719	0.0948	6.0771	0.3044	5.2811	3.5382	0.000470686	0.0147539	up
Unigene0046777	5.2414	6.2373	12.5453	58.4987	123.413	97.1705	3.53814	1.76641e-10	1.03063e-07	up
Unigene0010223	0.0533	0.332	0	2.3391	0.3841	1.7521	3.53793	0.00151441	0.0338683	up
Unigene0006345	0.1008	6.31	8.0746	35.6969	67.3453	64.9796	3.53598	0.000199446	0.00781817	up
Unigene0004173	0.3946	0.8197	0.3936	9.7566	0.9482	7.8983	3.53229	9.34719e-05	0.00447207	up
Unigene0040667	0.1979	0.2643	0.2467	1.0484	3.5662	3.5718	3.52958	3.98004e-05	0.00235281	up
Unigene0023300	0.3409	0	0.102	0.774	2.2388	2.0956	3.52782	0.00049959	0.0153771	up
Unigene0036759	0	0.7219	0.2941	5.9701	0.4724	5.2697	3.52704	0.00204754	0.041912	up
Unigene0025843	5.0682	11.877	11.5902	66.5272	130.457	131.916	3.52683	6.5628e-11	4.32097e-08	up
Unigene0048169	0	0.7366	1.0036	3.0634	7.7373	9.2552	3.5267	0.000209547	0.00811568	up
Unigene0006734	0.2673	0.2379	0.3332	5.1583	2.1942	2.2926	3.52409	3.86425e-05	0.00229952	up
Unigene0034843	1.4005	4.8679	11.2401	30.5856	71.1961	98.9116	3.51887	1.12904e-06	0.000144176	up
Unigene0050836	0.4982	0.8426	0.0662	9.0614	0.665	6.3979	3.51854	0.000171647	0.00703506	up
Unigene0048908	1.9995	1.4515	2.2651	17.2479	19.1852	29.0556	3.51814	4.4992e-12	4.58432e-09	up
Unigene0043063	0.3072	0.1094	0.3676	1.8366	3.5181	3.601	3.51351	2.47478e-06	0.000277942	up
Unigene0046412	0.2371	0.3165	0.0946	3.983	0.2658	3.1518	3.51313	0.000192978	0.00763465	up
Unigene0048624	0	0.1386	0.4657	0.7068	2.1193	4.0611	3.51058	0.00208283	0.0423927	up
Unigene0022708	0.0824	0.1467	0.0411	2.152	0.3961	0.5302	3.51003	0.00185207	0.0390583	up
Unigene0041072	0	0.4293	0.3206	1.7033	3.047	3.7919	3.50984	9.9491e-05	0.00466671	up
Unigene0044072	0.0655	0.4374	0.0653	3.9543	0.2099	2.3064	3.50943	0.000685912	0.0193267	up
Unigene0046772	0.7307	0.1183	0.0662	5.7812	2.9791	1.6618	3.50942	0.000359093	0.0121046	up
Unigene0021448	0.1639	0.1459	0.2179	1.3541	2.5815	2.0697	3.50845	8.39485e-08	1.75818e-05	up
Unigene0005504	0	0.2367	0.1515	2.1563	0.1826	2.0773	3.50793	0.00145318	0.0328365	up
Unigene0044888	0.2157	0.288	0.1076	2.7346	1.1662	3.0453	3.50625	0.00010048	0.00470387	up
Unigene0027721	0.0375	0.1334	0.0374	1.7293	0.06	0.5757	3.50511	0.00256495	0.0485818	up
Unigene0020778	0	0.2419	0.7744	3.0852	4.3843	4.0517	3.50289	0.000155079	0.00650596	up
Unigene0001476	0.2556	0.1706	0.1912	4.0498	0.435	2.5119	3.5024	1.90917e-05	0.00136604	up
Unigene0008060	1.7546	2.738	3.1498	21.9656	27.659	36.9026	3.50106	6.52969e-12	6.16592e-09	up
Unigene0023845	0.1213	0.162	0.242	2.6627	1.7003	1.5826	3.50061	7.16195e-06	0.000653094	up
Unigene0002587	0.0363	0.1291	0.2893	2.4701	2.2073	0.4666	3.4999	0.00043087	0.0137982	up
Unigene0026131	0.5599	1.0994	1.7573	3.3525	17.752	17.4679	3.49694	4.90266e-07	7.33009e-05	up
Unigene0047618	0	0.5405	0.2271	3.4462	1.5195	3.6888	3.49502	0.000576506	0.0169894	up
Unigene0027576	0.4633	0.5026	0.8374	3.7144	7.5947	9.0134	3.49437	1.60314e-09	6.11973e-07	up
Unigene0018498	0.1958	0.1743	0.1302	1.5311	2.6134	1.4927	3.49411	0.000179212	0.00726492	up
Unigene0063443	0.3289	0.0732	0	1.5556	1.3828	1.5867	3.49232	0.00229228	0.0452481	up
Unigene0029477	0.0631	0.1124	0.0629	1.3135	0.556	0.812	3.49158	0.000281394	0.0101074	up
Unigene0049392	0.5848	0.7913	0.2333	10.3655	0.4871	7.2483	3.49147	5.73323e-05	0.00309594	up
Unigene0063810	0	0.1902	0.2131	1.0106	1.8823	1.6417	3.49105	0.000630773	0.0181508	up
Unigene0036791	0.885	4.5489	6.8901	29.4057	57.2749	51.7906	3.49004	2.46479e-07	4.29039e-05	up
Unigene0044940	0.064	0.3131	0.2232	3.6423	0.2177	2.88	3.48899	0.000227823	0.00862405	up
Unigene0003712	1.1598	0.8963	0.0508	14.613	0.347	8.6908	3.4887	0.0012866	0.0301648	up
Unigene0001053	0	0.2724	0.1221	0.9265	1.1766	2.319	3.48663	0.00162958	0.0357312	up
Unigene0044295	0.2349	0.1394	0.0781	3.1993	0.1881	1.6787	3.4852	0.00130663	0.0305048	up
Unigene0018714	0.0625	0.3336	0.0623	3.1911	0.1001	1.8307	3.482	0.00237674	0.0464894	up
Unigene0048286	1.3977	1.7972	3.4074	11.9296	28.358	33.4126	3.48063	4.02246e-08	9.92014e-06	up
Unigene0042572	0.1622	0.4187	0.2588	2.6394	3.3517	3.374	3.47935	2.60994e-08	6.93723e-06	up
Unigene0006604	0.214	0.1905	0.3201	3.887	0.3428	3.8241	3.47443	0.00053275	0.0160685	up
Unigene0043714	0.0308	0.0137	0.0614	0.2212	0.7021	0.2529	3.47336	0.000880694	0.0230755	up
Unigene0009810	0	0.7858	0.1761	2.1379	2.9693	5.5526	3.47015	0.000956499	0.0245596	up
Unigene0046574	0.1259	0.028	0.1569	2.2267	0.1134	1.1021	3.46927	0.000788973	0.0213505	up
Unigene0028504	0.115	0.2218	0	1.7843	0.2763	1.6578	3.46472	0.00104389	0.0261395	up
Unigene0035650	0.4193	0.5599	1.0036	3.5542	9.4029	8.8715	3.46061	4.38076e-07	6.74657e-05	up
Unigene0046622	0.5041	0.9493	0.3868	11.4168	0.823	8.0109	3.46004	2.03581e-05	0.00142678	up
Unigene0022452	0.0478	1.9141	1.5726	6.4733	17.719	14.6868	3.45942	5.88579e-05	0.00315459	up
Unigene0000634	0	0.3719	0.7739	2.6878	4.3023	5.6103	3.45904	0.000157401	0.0065713	up
Unigene0017899	0	0.3181	0.6236	2.2649	3.935	4.1505	3.45828	0.000171231	0.00702811	up
Unigene0045018	0.4959	3.9208	6.5745	22.6717	54.0346	43.9928	3.45699	4.03511e-06	0.000413101	up
Unigene0052420	0.5718	0.3393	0.2851	2.5964	5.4952	5.0406	3.45658	4.94949e-05	0.00275567	up
Unigene0035172	0	0.4308	0.0439	2.3473	0.3523	2.4999	3.45328	0.00259275	0.0490047	up
Unigene0050184	0.2766	0.8741	0.2896	8.8182	0.6424	6.2871	3.4507	2.43673e-05	0.00163893	up
Unigene0009419	1.2554	3.1738	0.4507	29.4155	2.1919	21.6979	3.44936	7.17688e-05	0.0036497	up
Unigene0005757	0.9707	3.9366	12.5856	45.3865	74.4631	70.4665	3.44356	4.47548e-06	0.000450473	up
Unigene0032830	0.6972	0.1432	0	5.398	2.2549	1.4758	3.44126	0.000813249	0.0217693	up
Unigene0064910	0.6988	0.2765	1.0842	3.2321	8.9552	10.157	3.43954	1.27205e-05	0.00100873	up
Unigene0039756	0	1.5533	3.2968	10.9997	22.5253	19.0887	3.43935	0.00196682	0.0408058	up
Unigene0021424	0	0.139	0.2337	1.1822	1.4074	1.4515	3.43866	0.000361989	0.0121793	up
Unigene0038454	0.0488	0.2896	0.292	1.5513	2.5276	2.7442	3.43609	3.37233e-06	0.000359611	up
Unigene0009025	0.3161	0.2814	0.2364	5.0834	0.3164	3.6149	3.43433	0.000330048	0.011415	up
Unigene0002509	0.7794	0.3212	0.144	7.4282	0.4855	5.5403	3.43428	0.00010466	0.00485521	up
Unigene0007834	0	0.6336	0.1775	2.7609	3.1355	2.862	3.43272	0.000764054	0.0208885	up
Unigene0008992	0.0222	0.2467	0.0221	1.7199	0.2575	1.1569	3.42905	0.000739612	0.0203991	up
Unigene0035566	0.1279	0.0759	0.085	2.0484	0.1024	0.9597	3.429	0.00112286	0.0275433	up
Unigene0005266	0	0.4654	0.8689	1.8463	4.0473	8.4698	3.42824	0.000759804	0.020836	up
Unigene0024025	1.2725	5.3176	6.0281	27.9284	54.6085	53.26	3.42787	4.18065e-08	1.01705e-05	up
Unigene0047834	0.2317	1.2377	1.9356	5.4589	11.8783	19.2769	3.42667	3.71314e-06	0.000388093	up
Unigene0024100	1.4459	10.5541	4.1818	53.5644	45.4513	74.6701	3.42404	3.34189e-07	5.35344e-05	up
Unigene0003659	0.2196	0.1955	0	0.6648	1.2312	2.5508	3.42124	0.00172127	0.0370411	up
Unigene0044481	0.6412	1.9741	3.8066	13.0104	29.6867	26.0422	3.42006	1.24705e-07	2.43857e-05	up
Unigene0067217	0	0.1863	0.261	1.4654	1.6765	1.6459	3.42005	0.000492085	0.0152549	up
Unigene0020853	0.398	0	0.1134	1.3984	2.1857	1.8897	3.42002	0.000353621	0.011988	up
Unigene0022936	0.0664	0.3249	0.0662	2.5362	0.1063	2.253	3.41961	0.00253306	0.0481618	up
Unigene0038500	0.8962	1.0257	0.7661	3.0038	11.6896	14.0324	3.41774	6.76329e-07	9.4738e-05	up
Unigene0003340	0.5609	0.5493	0.1119	7.3444	0.5391	5.1723	3.41726	0.000191785	0.00760842	up
Unigene0044122	0.2115	0.0941	0.0527	2.4407	0.1482	1.2281	3.4132	0.00132192	0.0307516	up
Unigene0060646	0.2971	0.147	0	2.5987	0.1851	1.947	3.41313	0.00218913	0.0439086	up
Unigene0046277	1.4206	3.9569	1.9195	24.2599	31.8569	21.5696	3.41229	4.81094e-10	2.43142e-07	up
Unigene0063465	0.2073	0.123	0.1378	3.2682	1.2174	0.4939	3.41111	0.00031617	0.0110201	up
Unigene0055031	0.2153	0.1916	0.7872	2.6609	4.9996	5.0006	3.40641	6.41282e-06	0.000603967	up
Unigene0001753	0.0518	0.0922	0.0517	1.0194	0.166	0.8887	3.40577	0.00131748	0.0306682	up
Unigene0039068	0.9731	0.3312	0.1713	8.8595	3.3009	3.4779	3.40571	8.23629e-06	0.000724369	up
Unigene0058233	1.5994	0.7119	0.4198	17.6785	1.9214	9.3261	3.40481	2.90779e-05	0.00187494	up
Unigene0044280	0	1.4347	0.4521	3.7737	5.9298	10.2605	3.40339	0.000418069	0.0135332	up
Unigene0053430	0.4579	0.3057	0	2.5994	1.4671	4.0098	3.40281	0.00170769	0.0368369	up
Unigene0035981	0.6402	3.3621	5.0224	17.4415	36.5384	41.4414	3.40236	7.85118e-07	0.000107315	up
Unigene0032827	0.1219	0.1085	0	1.4603	0.1627	0.813	3.4023	0.00125397	0.0296418	up
Unigene0035716	0.0551	0.3435	0.1649	2.8787	0.2208	2.8568	3.40193	0.000768064	0.020963	up
Unigene0039906	0	2.1194	2.9022	11.7725	14.7463	26.4732	3.39956	0.000327073	0.0113346	up
Unigene0000232	1.6858	10.4128	32.4934	102.798	206.244	161.372	3.39907	1.80059e-05	0.00130658	up
Unigene0049282	0	0.17	0.0714	1.3913	0.1721	0.9813	3.398	0.00154117	0.0342744	up
Unigene0039986	0	0.4247	0.6511	1.7482	4.7859	4.738	3.38927	0.000274911	0.00992268	up
Unigene0022623	0.1694	0.0754	0.169	1.4745	1.2212	1.6348	3.38753	0.00150191	0.0336621	up
Unigene0028300	0.1	0.8455	0	2.9511	2.7626	4.1808	3.38748	0.000892565	0.023327	up
Unigene0016934	0.1318	0.0587	0.1315	0.8978	1.4779	0.9892	3.38543	0.00166781	0.0362593	up
Unigene0046696	0.0824	3.1895	5.3806	17.6572	31.978	40.742	3.38477	0.000225322	0.00855579	up
Unigene0036930	0.0486	0.2811	0.4845	1.342	2.7624	4.3926	3.3835	4.39054e-05	0.0025268	up
Unigene0029704	0.3143	8.9541	22.7954	45.3364	101.815	187.195	3.38233	0.000519887	0.015796	up
Unigene0048396	0.1163	0.3105	0	2.4639	0.3026	1.683	3.38201	0.00199036	0.0411051	up
Unigene0042598	0.6303	0.2805	0.0349	5.7373	0.3926	3.7292	3.382	0.000666463	0.01889	up
Unigene0020293	0.3195	0	0.4779	3.6872	3.1983	1.4272	3.38194	0.000930242	0.0240923	up
Unigene0008504	0.6487	0.4949	0.7393	11.7818	0.1484	7.6833	3.38082	0.00226649	0.0449204	up
Unigene0046665	0.1608	0.2684	0.1002	3.4529	0.0483	2.0113	3.38028	0.00101696	0.0256801	up
Unigene0042125	0.089	2.2192	2.6639	10.4783	16.0801	25.2022	3.37993	5.84826e-05	0.00313916	up
Unigene0039021	0.4155	0.9415	0.6781	6.7184	6.5046	7.9384	3.37826	3.93431e-08	9.76988e-06	up
Unigene0003992	0.0495	12.3537	21.0445	83.3691	120.895	143.102	3.37648	0.0018116	0.0384421	up
Unigene0035145	0.1991	0.7089	0.1985	4.4446	3.986	3.0594	3.3763	0.00014714	0.00628482	up
Unigene0067609	0.085	0.1892	0.0848	1.2227	1.1918	1.3067	3.37371	0.000230129	0.00868776	up
Unigene0067832	0.5467	0.6257	0.3895	8.0978	1.251	6.8386	3.3735	1.52309e-05	0.00114817	up
Unigene0043704	0.857	0.3269	1.0989	12.8788	1.5688	9.1883	3.3721	0.000297426	0.0105252	up
Unigene0050809	0.0643	0.3245	0.0748	2.6896	0.3349	1.7663	3.36931	5.34861e-05	0.00293838	up
Unigene0017505	0.1109	0.2961	1.0506	2.8115	4.6626	7.5696	3.36749	8.10638e-05	0.00398195	up
Unigene0009894	0.191	0.17	0.127	2.4086	1.5803	1.0464	3.36712	0.000413275	0.0134326	up
Unigene0069706	1.1822	0.5262	0.5895	15.2098	2.367	6.1263	3.36669	0.000266748	0.00969794	up
Unigene0046829	0.0821	0.2922	0.0205	2.5154	0.3944	1.1585	3.36523	0.000764336	0.0208885	up
Unigene0029851	0.076	0.2199	0.0379	1.9274	0.1522	1.3585	3.36456	0.00109468	0.0270155	up
Unigene0001711	0.2993	11.2514	7.646	33.9597	73.6449	90.0335	3.36393	0.000124824	0.00558138	up
Unigene0022989	0.5499	0.0612	0	2.1589	1.8718	2.2601	3.36376	0.00104542	0.0261577	up
Unigene0011094	0.1893	0.5475	1.0853	3.1152	8.2605	7.3724	3.36307	1.16928e-05	0.000942857	up
Unigene0021684	0.4176	0.4956	0.1388	4.4243	1.5049	4.875	3.36039	0.000130739	0.00577971	up
Unigene0012349	0.6426	0.572	0.2476	1.4589	7.2047	6.3466	3.35973	1.21139e-06	0.000151987	up
Unigene0009028	0.1035	0.0922	0.5163	1.9197	2.2388	3.1451	3.35866	0.000173482	0.00707797	up
Unigene0048288	1.668	2.5571	12.476	10.5896	53.3599	107.168	3.35698	0.000117696	0.00532571	up
Unigene0051546	0.2409	0.1072	0.3604	3.6007	1.1576	2.4967	3.35614	0.000230942	0.00871386	up
Unigene0010787	0.1886	0.4133	0.492	2.1961	3.9508	5.0505	3.35561	9.21769e-08	1.9119e-05	up
Unigene0034481	0	0.1616	0.4527	1.0993	2.6902	2.4983	3.35554	0.000783411	0.0212641	up
Unigene0041595	0.0901	0.2807	0.6289	2.5342	4.1729	3.5204	3.35481	1.67732e-06	0.000199729	up
Unigene0001017	0.5898	0.1313	0.4412	3.4035	3.4246	5.0589	3.35433	5.39188e-05	0.0029561	up
Unigene0046804	0.4564	0.3047	0.4552	3.5404	5.3914	3.5069	3.35426	0.000118843	0.00536407	up
Unigene0023199	0.0541	0.5937	0.2696	2.4487	3.3925	3.5302	3.35264	2.98386e-06	0.000324947	up
Unigene0010128	1.0524	2.9665	2.9737	5.2433	15.1711	50.9318	3.35094	1.47137e-05	0.00112096	up
Unigene0001654	0.1142	0.305	0.541	0.8858	4.7329	4.1628	3.34865	6.24857e-05	0.0033046	up
Unigene0031102	0	0.355	0.0994	1.3957	1.5568	1.6745	3.34804	0.0011496	0.0278913	up
Unigene0021861	0	0.0982	0.2201	1.0856	0.9721	1.1831	3.34789	0.00219084	0.0439306	up
Unigene0067484	6.3441	21.1211	33.3592	116.024	245.016	255.665	3.34186	9.06476e-08	1.89111e-05	up
Unigene0041593	0.0869	0.1934	0.0867	2.0553	0.174	1.4908	3.34149	0.000658085	0.0187116	up
Unigene0000016	1.2738	2.1576	0.5999	23.1643	1.9412	15.7571	3.34146	2.09837e-05	0.00146064	up
Unigene0033781	1.5161	1.2934	0.882	20.7495	1.4166	15.2171	3.34011	2.30125e-05	0.00156839	up
Unigene0064435	0.0512	1.0029	1.711	5.5038	9.2491	13.2149	3.33836	6.54999e-05	0.00343114	up
Unigene0047465	0.0567	0.4666	0.0283	2.8196	0.2269	2.5314	3.33803	0.00171682	0.0369664	up
Unigene0048422	3.3378	4.8812	4.3512	36.195	45.2149	45.6878	3.33786	2.9092e-12	3.16336e-09	up
Unigene0002754	0	0.1839	0.2748	1.2511	1.7101	1.674	3.33701	0.00149765	0.0336297	up
Unigene0068053	0.174	0.1936	0.2603	1.9427	2.3695	2.0214	3.33442	2.6091e-05	0.00172895	up
Unigene0025376	0.3696	0	0.1843	1.8184	2.4423	1.3211	3.33303	0.0022141	0.0441872	up
Unigene0048622	0.1959	0.5231	0.1954	0.9265	2.5101	5.7755	3.33263	0.000243569	0.00906166	up
Unigene0009079	2.5096	27.4217	41.4422	136.162	269.928	312.824	3.33236	1.5612e-05	0.00116831	up
Unigene0002141	0.214	0.1905	0.2134	1.1337	3.1707	1.9121	3.33066	0.000171281	0.00702811	up
Unigene0004950	0.1041	0.1544	0	1.3783	0.1667	1.0538	3.32961	0.00234138	0.0459479	up
Unigene0006506	0.2074	1.0153	2.0683	5.8072	10.5884	16.6765	3.32902	1.61584e-05	0.0011992	up
Unigene0035097	0.3218	0.5281	0.7521	3.1201	6.1687	6.7921	3.3274	5.98836e-09	2.01766e-06	up
Unigene0048875	0.1345	0.1415	0.061	1.7354	0.1763	1.4685	3.32629	4.47104e-05	0.00255266	up
Unigene0031250	1.5473	2.4241	1.111	28.5721	2.974	19.3763	3.32472	1.54272e-05	0.00116053	up
Unigene0006966	0.1001	0.4676	0.8732	3.048	5.289	6.0971	3.32444	7.02357e-06	0.000642894	up
Unigene0012626	0.3881	0.1727	0.1935	3.6897	2.8944	0.9535	3.32089	1.65485e-05	0.00121867	up
Unigene0070418	0.4533	2.9255	6.6117	17.282	41.342	41.1904	3.32062	1.61871e-05	0.00120008	up
Unigene0004627	0.0711	0.1742	0	1.2384	0.2706	0.9408	3.32004	0.00142455	0.0323836	up
Unigene0027154	1.9233	10.927	13.2011	52.6577	120.056	87.377	3.31958	7.40842e-07	0.000102049	up
Unigene0041634	0.5253	6.4798	27.9907	65.2566	103.315	180.606	3.31871	0.000392559	0.0129588	up
Unigene0035867	0.6019	0.4286	0.5602	2.1257	6.1701	7.5717	3.31834	3.17715e-06	0.000341334	up
Unigene0003593	0.4659	0.8295	0.2323	1.5426	7.0895	6.5771	3.31551	7.05525e-05	0.00361921	up
Unigene0029996	0.7488	1.3997	0.0747	11.7868	0.7196	9.5801	3.31246	0.00158258	0.0349194	up
Unigene0030100	0.3592	0.1599	0.5374	2.311	4.7473	3.4345	3.31204	1.63254e-05	0.0012066	up
Unigene0047055	0.0585	0.2344	1.0796	2.5022	5.9284	5.197	3.31165	7.06652e-05	0.0036224	up
Unigene0043728	0.3531	0.5343	1.2677	3.6344	8.1445	9.5909	3.30975	1.7951e-06	0.000212236	up
Unigene0006425	0.4328	0.4281	0.3597	1.4559	3.0236	7.6142	3.30859	5.75147e-06	0.00055628	up
Unigene0029960	0.268	0.4771	0.0891	4.665	0.5008	3.0969	3.30815	0.000651693	0.018574	up
Unigene0020143	0.3346	16.5312	9.6775	48.0518	69.341	145.298	3.30694	0.000257231	0.00945719	up
Unigene0017506	0.0465	0.4142	0.6032	1.9014	3.8379	4.7888	3.30681	0.000116828	0.00529644	up
Unigene0069497	0.1253	0.2788	0.4685	1.1615	4.7159	2.7537	3.30615	4.28877e-05	0.00248216	up
Unigene0030213	0.5774	1.9016	0.4606	15.9488	1.5722	11.5552	3.30615	0.000151125	0.00641205	up
Unigene0046864	0.1674	0.2129	0.0239	1.9097	0.0958	1.9917	3.30585	0.0013132	0.0305932	up
Unigene0047755	0.0504	0.5837	1.2074	2.5196	8.201	7.4636	3.30373	0.000105689	0.00489345	up
Unigene0014021	0	1.4375	3.2942	12.1658	18.0475	16.4744	3.30261	0.000353748	0.011988	up
Unigene0069591	0.386	0.2062	0.462	2.1911	5.0083	3.2006	3.30236	6.25148e-06	0.000593444	up
Unigene0045526	0.1093	1.2263	0.0545	7.4721	0.8669	5.3612	3.30094	0.00114317	0.0277876	up
Unigene0008673	0.5063	1.4648	0.7575	17.4356	1.5207	7.8717	3.29751	0.000539367	0.016223	up
Unigene0043400	0.2922	0.8038	0.7814	4.1005	6.392	7.9449	3.29583	1.71309e-08	4.97739e-06	up
Unigene0049403	0.7389	0.5591	0.7369	4.6412	8.1957	7.1298	3.29457	6.30127e-08	1.38717e-05	up
Unigene0047057	0.0972	0.5406	0.0969	4.1546	0.3502	2.6911	3.29195	0.000825785	0.0219738	up
Unigene0016123	0.674	1.0153	1.8614	6.0034	14.5331	14.1936	3.29001	4.96769e-07	7.3965e-05	up
Unigene0006592	0.0524	0.2799	0.0523	2.5189	0.5037	0.7306	3.28669	0.00100113	0.0253877	up
Unigene0032003	0.5052	1.3341	2.5695	8.1182	17.0741	17.8264	3.28651	2.5692e-07	4.4063e-05	up
Unigene0023867	0.5654	1.0485	0.3759	9.7697	0.9056	8.6883	3.28265	0.00015018	0.0063812	up
Unigene0063265	0.1409	0	0.2811	1.76	1.1852	1.1586	3.28165	0.00263362	0.0495164	up
Unigene0003958	0.0494	0.5426	0.6573	3.3168	4.8031	4.0276	3.28147	1.08153e-05	0.000889219	up
Unigene0048901	1.3645	0.2024	0.2268	6.7986	4.3713	6.2584	3.28042	0.000302926	0.0106568	up
Unigene0041348	0	0.9268	1.3996	3.1862	7.4324	11.9724	3.27958	0.000606666	0.0175911	up
Unigene0008775	0	0.8394	0.7054	1.6313	6.6894	6.6683	3.27841	0.000761065	0.0208411	up
Unigene0064314	0.5771	0.3853	0.3597	5.0228	3.4087	4.3829	3.27686	1.85962e-05	0.00133725	up
Unigene0045187	0.4809	0.1712	0.1439	5.2776	0.1156	2.3204	3.27656	0.00180514	0.0383278	up
Unigene0041237	2.0077	1.7872	1.3348	4.305	16.2801	29.0596	3.27469	7.95267e-06	0.000704231	up
Unigene0029607	0.4523	0.2013	0.0752	3.7795	1.7508	1.5221	3.27452	2.44499e-05	0.00164295	up
Unigene0010030	0.354	0.7879	0.765	5.2694	6.2615	6.9169	3.27415	5.45467e-08	1.24894e-05	up
Unigene0043705	0.0994	0.6193	1.0904	2.4447	3.4229	11.6156	3.27263	0.00023186	0.00873474	up
Unigene0014366	0.5083	0.4524	1.1405	4.2793	6.7164	9.3093	3.27255	5.22395e-06	0.000513565	up
Unigene0043349	0.0422	0.1971	0.0631	1.5638	0.1182	1.2358	3.27035	0.000716397	0.019943	up
Unigene0010383	0.2807	0.8329	0.1866	5.4881	0.2998	6.7216	3.26622	0.0013926	0.0319404	up
Unigene0014912	1.418	2.2878	3.4471	8.0487	18.7739	41.8412	3.26295	1.06794e-06	0.000138093	up
Unigene0003294	0.1488	0.1986	0.0742	1.351	1.3105	1.3823	3.26176	0.00160655	0.0353234	up
Unigene0009509	0.1389	0.1855	0.2771	0.9987	1.8912	2.8792	3.26171	0.000589238	0.017239	up
Unigene0039978	1.2021	2.2421	2.5119	9.0977	25.0316	22.9133	3.2596	9.56259e-08	1.97204e-05	up
Unigene0057857	0	0.2558	0.3582	0.7067	1.7546	3.4143	3.25843	0.00130632	0.0305048	up
Unigene0050091	0.2162	0.2717	0.0254	2.839	0.5092	1.5542	3.25561	0.000199346	0.00781817	up
Unigene0053011	0.2061	4.2199	4.4194	17.2757	38.6681	28.4337	3.25386	5.31467e-05	0.00292495	up
Unigene0001420	2.128	16.3011	18.626	69.6342	147.289	135.797	3.25078	2.9434e-06	0.000321516	up
Unigene0018458	0	1.2707	0.9706	1.424	7.0152	12.8929	3.25062	0.0019318	0.0402899	up
Unigene0026938	0.2379	0.2824	0.0791	1.8305	1.6831	2.1823	3.24833	7.89179e-05	0.00390595	up
Unigene0055143	0.2157	0.096	0.2689	1.5102	1.6845	2.3129	3.24581	0.000250954	0.00928829	up
Unigene0023173	3.4286	7.7538	27.3548	82.5429	138.335	144.591	3.24543	2.76631e-06	0.000304957	up
Unigene0011742	0.0682	0.3237	0.408	2.0984	2.6028	2.8753	3.24364	1.1073e-05	0.000906119	up
Unigene0002799	0.3564	0.7931	0.1333	6.7766	0.3925	4.9515	3.24009	0.00050962	0.0155764	up
Unigene0037467	0.1367	0.2029	0.2727	1.2073	2.8837	1.694	3.24001	0.000154711	0.00650596	up
Unigene0047571	1.5924	4.1909	1.3119	41.1066	2.5784	23.2843	3.23858	8.0194e-05	0.00395547	up
Unigene0016717	0.0896	0.6647	0.8341	2.5771	6.0405	6.3733	3.23844	9.57398e-06	0.000815411	up
Unigene0046370	0.2551	0.369	0.1272	3.5957	0.3831	3.0997	3.23598	0.000428566	0.013749	up
Unigene0059715	0	0.1617	0.3019	1.2831	0.8729	2.2073	3.23447	0.00244831	0.0472581	up
Unigene0050325	0.1597	2.986	3.5047	15.4136	24.6267	22.5499	3.23442	4.30691e-05	0.00249065	up
Unigene0046778	2.1082	8.6656	21.1485	58.9392	142.273	99.1882	3.23425	6.19068e-06	0.000588451	up
Unigene0043810	0.258	0.1838	0.1372	3.3589	0.1929	1.8936	3.2334	0.000416573	0.0134909	up
Unigene0049195	0.4272	1.4165	0.3089	10.3779	0.9408	8.9237	3.23323	8.48561e-05	0.00412308	up
Unigene0000513	0.1429	0.1749	0.0713	2.0277	0.1431	1.481	3.23039	0.000809833	0.0217103	up
Unigene0071520	0.2713	0.8853	0.3607	7.9377	1.3759	4.9118	3.22889	0.000481801	0.0150139	up
Unigene0036666	3.6185	2.3505	4.4866	17.9856	49.2664	30.7578	3.22865	5.88244e-08	1.33595e-05	up
Unigene0046896	0.2366	0.3686	0.649	1.7014	8.9315	1.1206	3.22825	0.000201983	0.00789514	up
Unigene0008232	5.6996	7.9804	19.0659	77.9584	139.796	87.5059	3.22065	2.22472e-08	6.07499e-06	up
Unigene0059485	0	0.0732	0.6359	1.8056	1.9931	2.8079	3.21985	0.00172991	0.0371702	up
Unigene0012297	0	0.3623	0.1739	1.3419	2.5841	1.0596	3.21692	0.000952597	0.0244857	up
Unigene0038655	0.2346	0.1044	0.117	1.4203	1.5969	1.2156	3.21451	0.000620303	0.0179141	up
Unigene0056484	0	0.2374	0.2127	0.6054	2.0074	1.5629	3.2137	0.00265482	0.0497763	up
Unigene0011501	0.1157	0.6178	0.0577	1.8384	3.1034	2.3977	3.21357	0.000649023	0.01852	up
Unigene0049117	0.1559	0.2776	0.0518	2.1041	0.2081	2.173	3.20822	0.00129194	0.0302603	up
Unigene0046273	0.13	0.2829	0.0144	2.1425	0.1909	1.6157	3.2082	0.000943297	0.0243251	up
Unigene0037941	2.0724	2.8101	2.932	13.3136	31.3623	27.5082	3.20746	1.18385e-09	4.8273e-07	up
Unigene0048618	0.7253	1.7755	0	5.6263	3.7757	13.6734	3.20589	0.0013084	0.0305362	up
Unigene0026033	0.2628	0.351	0.3277	1.4919	3.7101	3.4756	3.20426	1.00741e-05	0.000848564	up
Unigene0027189	0	1.5016	0.9176	5.1064	7.6758	9.5086	3.20385	0.000474967	0.0148525	up
Unigene0038858	0	0.444	0.1658	1.6988	0.6325	3.2683	3.19892	0.00250189	0.0477274	up
Unigene0029692	0.0909	0.8092	0.272	6.6392	0.5096	3.6063	3.19785	0.00140884	0.0321401	up
Unigene0047785	0.1689	0.6577	0.2526	5.7516	0.2029	3.9383	3.19642	0.000991456	0.0252405	up
Unigene0031328	0.1263	1.4621	3.1501	11.57	13.1545	18.6489	3.19431	7.484e-05	0.00376377	up
Unigene0006019	0.2716	0.3627	0.1129	4.0427	0.3988	2.3783	3.19016	0.000288691	0.0103024	up
Unigene0035472	0.2918	0.4156	1.1205	4.3729	5.4923	6.8104	3.18948	2.34275e-07	4.11076e-05	up
Unigene0003820	0.0357	0.1906	0.2847	3.2409	0.1429	1.2626	3.18472	0.00217451	0.0437131	up
Unigene0016416	0	0.4293	0.6947	2.3522	4.9783	2.8727	3.18231	0.000746988	0.0205475	up
Unigene0045307	0.451	0.5735	0.3427	7.2976	0.5848	4.5283	3.18229	8.32339e-05	0.0040668	up
Unigene0045521	0.9278	1.1098	1.4457	7.4603	15.1858	8.9733	3.18228	1.08091e-08	3.32929e-06	up
Unigene0011191	2.0876	12.5861	9.0851	53.539	92.4902	69.5913	3.18196	4.53443e-07	6.908e-05	up
Unigene0038372	0.0524	0.3263	0.0522	2.1998	0.2097	1.4974	3.1806	0.0024558	0.0473772	up
Unigene0040495	0.119	1.205	1.3204	4.3006	8.5779	11.0582	3.17821	1.98179e-05	0.00140956	up
Unigene0036396	0.1121	0.449	0.1118	3.3298	0.1571	2.584	3.17345	0.00217158	0.0436787	up
Unigene0045736	0.7129	0.9853	0.1497	9.3569	0.601	6.705	3.17268	0.00037168	0.0124239	up
Unigene0047140	0.2883	0.3422	1.0544	1.6003	10.3151	3.229	3.16805	0.00104003	0.0260704	up
Unigene0031820	0.1361	0.4845	0.1357	3.9136	0.9809	1.8968	3.16666	0.00120104	0.0286931	up
Unigene0004938	0.119	0.653	0.5932	2.4607	7.1927	2.5933	3.16521	2.02028e-05	0.00142423	up
Unigene0050438	0.1068	0.1664	0.3729	1.334	2.032	2.4244	3.16383	4.37086e-05	0.00251749	up
Unigene0026744	0.3999	0.178	0.1994	2.3457	2.2822	2.3227	3.16059	0.000103256	0.00479939	up
Unigene0048900	1.3741	1.7269	1.048	12.1735	10.552	14.3285	3.15879	3.26695e-07	5.28054e-05	up
Unigene0001311	0.3432	0.9164	0.1711	3.3114	3.9852	5.4577	3.15619	0.000223686	0.00851168	up
Unigene0007470	0.9704	0.9214	0.7097	6.3406	8.8083	8.0232	3.15497	1.9901e-08	5.6229e-06	up
Unigene0071378	0	0.1484	0.4987	0.8515	2.4029	2.502	3.15311	0.0020456	0.0418963	up
Unigene0011579	0.1113	0.3522	0.0247	2.3394	0.2179	1.7852	3.15298	0.00140378	0.0321069	up
Unigene0012372	1.7867	2.6242	0.0891	17.105	1.9675	20.9441	3.1526	0.00112955	0.0275726	up
Unigene0035763	6.8509	22.6086	9.7176	98.002	134.868	115.344	3.15189	6.9447e-09	2.29674e-06	up
Unigene0055319	0	0.261	0.4142	1.4422	1.4088	3.1434	3.15023	0.000822458	0.0219127	up
Unigene0008356	0.7559	1.0094	0.9424	13.7304	0.9081	9.3882	3.1495	0.00057795	0.0170198	up
Unigene0045929	0.4161	0.4398	0.4149	3.4243	4.8941	2.9553	3.14915	4.62371e-07	7.00053e-05	up
Unigene0040886	0.265	0.2359	0.024	2.6253	0.4341	1.5927	3.14777	0.000343392	0.0117576	up
Unigene0032574	0.7427	0.8815	0.7407	11.3352	0.4957	9.1131	3.14669	0.00210175	0.0426325	up
Unigene0046854	0.1094	2.6283	1.854	7.1795	14.4071	19.0723	3.14647	0.000116513	0.00528553	up
Unigene0010249	0.0813	0.4127	0.0162	2.6532	0.1759	1.6803	3.1438	0.00263764	0.04954	up
Unigene0047767	0.7374	1.5276	0.8959	7.4984	9.6746	10.7523	3.14317	1.88739e-09	6.94619e-07	up
Unigene0048567	2.0065	2.7937	0.5644	27.9374	2.2251	17.2106	3.14253	0.000110655	0.0050678	up
Unigene0036825	0.0465	1.6762	1.4142	4.5215	9.3834	13.7582	3.14055	0.000263553	0.00962062	up
Unigene0026666	0.1249	0.2224	0.7476	1.3946	3.3019	4.9562	3.14013	0.000132566	0.00582539	up
Unigene0031651	0	0.2421	0.5425	1.5781	2.6139	2.7217	3.13943	0.00230361	0.0454302	up
Unigene0031796	0	0.4135	0.4117	1.1327	2.5212	3.615	3.13892	0.00149199	0.033555	up
Unigene0038270	0.3032	0.2024	0.3672	1.852	2.5235	3.3125	3.13889	8.40307e-08	1.75818e-05	up
Unigene0020652	0.1236	0.4766	0.4929	1.9948	3.3149	4.3126	3.13796	7.37276e-06	0.000665574	up
Unigene0070038	0.3823	0.1701	0.4766	0.3616	3.3678	5.3283	3.1379	0.00117859	0.0282523	up
Unigene0036044	0.1897	0.1055	0.4492	0.8971	2.753	2.8976	3.13684	8.78715e-05	0.00424659	up
Unigene0034348	0.1344	0.4787	0.1341	2.3403	2.2612	1.9701	3.13668	0.000490064	0.0152185	up
Unigene0061759	0	0.8439	1.3818	3.3114	6.2491	10.0078	3.13619	0.000930767	0.0240972	up
Unigene0017319	0.3423	0.2285	0	1.0038	1.4735	2.5384	3.13539	0.0016405	0.0358831	up
Unigene0037923	4.0066	9.1992	29.045	80.6362	148.335	141.848	3.13367	2.68725e-06	0.000298073	up
Unigene0043479	0.8609	0.6386	1.0302	12.0529	1.241	8.9017	3.13324	3.38823e-05	0.00208542	up
Unigene0003979	0.8144	1.7951	0.6188	16.3475	1.1492	10.8105	3.13232	0.000179279	0.00726492	up
Unigene0046006	0.3617	2.5756	4.5988	10.3669	27.1551	28.5011	3.13108	3.82831e-05	0.00228381	up
Unigene0044836	2.8428	9.0179	3.6599	70.0197	7.8651	57.9293	3.12938	2.69469e-05	0.00177257	up
Unigene0037757	0.3026	0.3078	1.0347	2.5736	6.6817	5.1291	3.12826	2.10432e-06	0.000243578	up
[truncated: 1,832 more rows]
