# Supplementary material for: Transcriptome Analysis Reveals the Molecular Response to Salinity Challenge in Larvae of the Giant Freshwater Prawn Macrobrachium rosenbergii
Source: Front Physiol. 2022 Apr 29;13:885035. doi: 10.3389/fphys.2022.885035 (PMC9099292; doi:10.3389/fphys.2022.885035)
Supplement: Supplementary file 3 [file Table9.XLSX]

## Sheet: S10 VS S13
Table S9 The significantly differentially enriched (P<0.05) KEGG pathways between S10 and S16.
KEGG Pathway	Gene Number	Pvalue	Genes
Ribosome	284	1.57e-31	Unigene0000367;Unigene0000462;Unigene0000498;Unigene0000530;Unigene0000684;Unigene0001146;Unigene0001148;Unigene0001154;Unigene0001190;Unigene0001602;Unigene0001954;Unigene0002020;Unigene0002191;Unigene0002244;Unigene0002347;Unigene0002461;Unigene0002649;Unigene0002910;Unigene0002976;Unigene0002985;Unigene0003017;Unigene0003057;Unigene0003254;Unigene0003396;Unigene0004018;Unigene0004161;Unigene00…
Biosynthesis of amino acids	44	3.76e-05	Unigene0002286;Unigene0002703;Unigene0005031;Unigene0005950;Unigene0009790;Unigene0010188;Unigene0011579;Unigene0012626;Unigene0013115;Unigene0019644;Unigene0020020;Unigene0020247;Unigene0023315;Unigene0023516;Unigene0023909;Unigene0023910;Unigene0025695;Unigene0025796;Unigene0026468;Unigene0026469;Unigene0029303;Unigene0030818;Unigene0032992;Unigene0035741;Unigene0036539;Unigene0040174;Unigene00…
Glutathione metabolism	26	0.00159216	Unigene0001219;Unigene0002970;Unigene0009167;Unigene0009242;Unigene0010640;Unigene0017575;Unigene0019807;Unigene0022503;Unigene0029190;Unigene0034724;Unigene0035449;Unigene0042762;Unigene0043016;Unigene0044137;Unigene0045413;Unigene0045695;Unigene0046425;Unigene0047684;Unigene0049392;Unigene0052266;Unigene0054602;Unigene0054750;Unigene0060924;Unigene0061260;Unigene0065297;Unigene0068466
ECM-receptor interaction	19	0.00191302	Unigene0004145;Unigene0004213;Unigene0006811;Unigene0008277;Unigene0017415;Unigene0025440;Unigene0026033;Unigene0027721;Unigene0032181;Unigene0040495;Unigene0042148;Unigene0044885;Unigene0045976;Unigene0046422;Unigene0048821;Unigene0050184;Unigene0051047;Unigene0054571;Unigene0057840
Glycolysis / Gluconeogenesis	30	0.00224852	Unigene0000584;Unigene0002286;Unigene0002703;Unigene0004247;Unigene0005615;Unigene0005950;Unigene0009790;Unigene0010188;Unigene0013115;Unigene0020020;Unigene0023315;Unigene0023516;Unigene0026468;Unigene0026469;Unigene0029303;Unigene0036539;Unigene0041727;Unigene0045307;Unigene0045568;Unigene0045569;Unigene0048216;Unigene0049910;Unigene0057135;Unigene0058134;Unigene0060857;Unigene0060891;Unigene00…
Nitrogen metabolism	10	0.00426685	Unigene0000016;Unigene0005031;Unigene0020247;Unigene0025695;Unigene0042404;Unigene0045177;Unigene0049403;Unigene0049405;Unigene0062086;Unigene0070654
Carbon metabolism	50	0.00549008	Unigene0000016;Unigene0000584;Unigene0002286;Unigene0002703;Unigene0005950;Unigene0009790;Unigene0010188;Unigene0011579;Unigene0012295;Unigene0013115;Unigene0020020;Unigene0023315;Unigene0023516;Unigene0023673;Unigene0023909;Unigene0023910;Unigene0026468;Unigene0026469;Unigene0029303;Unigene0030818;Unigene0032992;Unigene0036539;Unigene0038014;Unigene0040174;Unigene0043243;Unigene0044137;Unigene00…
Phagosome	62	0.00866767	Unigene0001501;Unigene0002335;Unigene0002695;Unigene0003756;Unigene0006618;Unigene0006811;Unigene0008119;Unigene0008262;Unigene0008768;Unigene0009417;Unigene0012767;Unigene0014157;Unigene0016593;Unigene0016837;Unigene0019335;Unigene0020750;Unigene0022183;Unigene0022936;Unigene0026037;Unigene0027721;Unigene0028050;Unigene0028759;Unigene0030408;Unigene0033772;Unigene0038386;Unigene0039000;Unigene00…
Phototransduction - fly	28	0.0100643	Unigene0000513;Unigene0005904;Unigene0006618;Unigene0012013;Unigene0012767;Unigene0019046;Unigene0019049;Unigene0023199;Unigene0028759;Unigene0034190;Unigene0036155;Unigene0037907;Unigene0038386;Unigene0038655;Unigene0039089;Unigene0040365;Unigene0042019;Unigene0046277;Unigene0046453;Unigene0046506;Unigene0047924;Unigene0047926;Unigene0049439;Unigene0049743;Unigene0049744;Unigene0058884;Unigene00…
Galactose metabolism	13	0.0113764	Unigene0002616;Unigene0005615;Unigene0010833;Unigene0011105;Unigene0039680;Unigene0042697;Unigene0044460;Unigene0046746;Unigene0048216;Unigene0054998;Unigene0058134;Unigene0061412;Unigene0067938
Cysteine and methionine metabolism	20	0.0259391	Unigene0007781;Unigene0010293;Unigene0012626;Unigene0019807;Unigene0023673;Unigene0025796;Unigene0031223;Unigene0035361;Unigene0042810;Unigene0042812;Unigene0044837;Unigene0044905;Unigene0046622;Unigene0047826;Unigene0050803;Unigene0057148;Unigene0063108;Unigene0065233;Unigene0071773;Unigene0071774
Folate biosynthesis	13	0.0266339	Unigene0002970;Unigene0003494;Unigene0010660;Unigene0011105;Unigene0013023;Unigene0018850;Unigene0019644;Unigene0035741;Unigene0036812;Unigene0037260;Unigene0044460;Unigene0046746;Unigene0054998
Fructose and mannose metabolism	15	0.0308252	Unigene0001026;Unigene0005950;Unigene0010188;Unigene0011105;Unigene0023315;Unigene0026276;Unigene0030513;Unigene0031172;Unigene0036539;Unigene0044460;Unigene0046746;Unigene0047347;Unigene0047348;Unigene0048216;Unigene0054998
Longevity regulating pathway - multiple species	24	0.039997	Unigene0002698;Unigene0007050;Unigene0008250;Unigene0010169;Unigene0020042;Unigene0021069;Unigene0024949;Unigene0026484;Unigene0027657;Unigene0027658;Unigene0028983;Unigene0032070;Unigene0034521;Unigene0034522;Unigene0035152;Unigene0035937;Unigene0039146;Unigene0045560;Unigene0045736;Unigene0049828;Unigene0066235;Unigene0069187;Unigene0069465;Unigene0072134
Glyoxylate and dicarboxylate metabolism	18	0.0457626	Unigene0000203;Unigene0005031;Unigene0011579;Unigene0020247;Unigene0023673;Unigene0023909;Unigene0023910;Unigene0025695;Unigene0030818;Unigene0042404;Unigene0043243;Unigene0044837;Unigene0045736;Unigene0047067;Unigene0052308;Unigene0062086;Unigene0062890;Unigene0067685
