# Supplementary material for: Transcriptome Analysis Reveals the Molecular Response to Salinity Challenge in Larvae of the Giant Freshwater Prawn Macrobrachium rosenbergii
Source: Front Physiol. 2022 Apr 29;13:885035. doi: 10.3389/fphys.2022.885035 (PMC9099292; doi:10.3389/fphys.2022.885035)
Supplement: Supplementary file 5 [file Table5.XLS]

## Sheet: S10 VS S13.GO terms
Table S5 The top 20 differentially enriched GO terms in three major functional categories between S10 and S13.
GO terms	GO ID	Description	GeneRatio (495)	BgRatio (2949)	pvalue	qvalue	geneID
Cellular Component	GO:0043227	membrane-bounded organelle	155	621	2.4e-09	4.176e-07	Unigene0000697;Unigene0001182;Unigene0001775;Unigene0002129;Unigene0002918;Unigene0003194;Unigene0003583;Unigene0003798;Unigene0004042;Unigene0004492;Unigene0004692;Unigene0004808;Unigene0005326;Unigene0005823;Unigene0006050;Unigene0006353;Unigene0006501;Unigene0006805;Unigene0007012;Unigene0007140;Unigene0007235;Unigene0007360;Unigene0008553;Unigene0008555;Unigene0008652;Unigene0008805;Unigene00…
	GO:0043231	intracellular membrane-bounded organelle	138	568	1.9e-07	1.653e-05	Unigene0000697;Unigene0001182;Unigene0001775;Unigene0002129;Unigene0003194;Unigene0003583;Unigene0003798;Unigene0004042;Unigene0004492;Unigene0004692;Unigene0004808;Unigene0005823;Unigene0006050;Unigene0006353;Unigene0006501;Unigene0007012;Unigene0007140;Unigene0007235;Unigene0007360;Unigene0008553;Unigene0008555;Unigene0008805;Unigene0008967;Unigene0009565;Unigene0009619;Unigene0010616;Unigene00…
	GO:0043234	protein complex	88	342	5e-06	0.00029	Unigene0000042;Unigene0000462;Unigene0001243;Unigene0001306;Unigene0001775;Unigene0002337;Unigene0003570;Unigene0003583;Unigene0003648;Unigene0004042;Unigene0005327;Unigene0005550;Unigene0005555;Unigene0006353;Unigene0006501;Unigene0006805;Unigene0008156;Unigene0008452;Unigene0009369;Unigene0009565;Unigene0009619;Unigene0009776;Unigene0009983;Unigene0010616;Unigene0010629;Unigene0010963;Unigene00…
	GO:0031090	organelle membrane	34	116	0.00043	0.0176486	Unigene0005326;Unigene0006805;Unigene0008553;Unigene0009619;Unigene0009634;Unigene0010616;Unigene0010760;Unigene0011282;Unigene0012651;Unigene0013274;Unigene0015153;Unigene0016714;Unigene0020460;Unigene0020498;Unigene0022609;Unigene0023419;Unigene0026369;Unigene0026421;Unigene0031165;Unigene0031519;Unigene0031759;Unigene0032574;Unigene0035869;Unigene0036781;Unigene0037504;Unigene0038510;Unigene00…
	GO:0019012	virion	9	17	0.00067	0.0176486	Unigene0003436;Unigene0008805;Unigene0009982;Unigene0019760;Unigene0030798;Unigene0033841;Unigene0034578;Unigene0034579;Unigene0071363
	GO:0044423	virion part	9	17	0.00067	0.0176486	Unigene0003436;Unigene0008805;Unigene0009982;Unigene0019760;Unigene0030798;Unigene0033841;Unigene0034578;Unigene0034579;Unigene0071363
	GO:0019866	organelle inner membrane	21	62	0.00071	0.0176486	Unigene0005326;Unigene0006805;Unigene0008553;Unigene0009634;Unigene0015153;Unigene0020460;Unigene0020498;Unigene0022609;Unigene0023419;Unigene0026369;Unigene0031165;Unigene0031519;Unigene0031759;Unigene0032574;Unigene0035869;Unigene0037504;Unigene0043044;Unigene0043904;Unigene0048385;Unigene0053725;Unigene0060927
	GO:0043226	organelle	226	1169	0.00167	0.0355733	Unigene0000042;Unigene0000462;Unigene0000697;Unigene0000831;Unigene0001182;Unigene0001306;Unigene0001775;Unigene0002024;Unigene0002129;Unigene0002337;Unigene0002461;Unigene0002918;Unigene0003194;Unigene0003583;Unigene0003798;Unigene0004042;Unigene0004111;Unigene0004492;Unigene0004692;Unigene0004808;Unigene0004922;Unigene0005326;Unigene0005823;Unigene0005994;Unigene0006050;Unigene0006353;Unigene00…
	GO:0005739	mitochondrion	11	26	0.00184	0.0355733	Unigene0011395;Unigene0032574;Unigene0041553;Unigene0043224;Unigene0043411;Unigene0043904;Unigene0045307;Unigene0054629;Unigene0059081;Unigene0059997;Unigene0069894
	GO:0031967	organelle envelope	23	78	0.00334	0.048865	Unigene0005326;Unigene0006805;Unigene0008553;Unigene0008652;Unigene0009634;Unigene0015153;Unigene0020460;Unigene0020498;Unigene0022609;Unigene0023419;Unigene0026369;Unigene0031165;Unigene0031519;Unigene0031759;Unigene0032574;Unigene0035869;Unigene0037504;Unigene0043044;Unigene0043904;Unigene0048385;Unigene0053725;Unigene0060927;Unigene0072104
	GO:0031975	envelope	23	78	0.00334	0.048865	Unigene0005326;Unigene0006805;Unigene0008553;Unigene0008652;Unigene0009634;Unigene0015153;Unigene0020460;Unigene0020498;Unigene0022609;Unigene0023419;Unigene0026369;Unigene0031165;Unigene0031519;Unigene0031759;Unigene0032574;Unigene0035869;Unigene0037504;Unigene0043044;Unigene0043904;Unigene0048385;Unigene0053725;Unigene0060927;Unigene0072104
	GO:0043229	intracellular organelle	221	1153	0.00337	0.048865	Unigene0000042;Unigene0000462;Unigene0000697;Unigene0000831;Unigene0001182;Unigene0001306;Unigene0001775;Unigene0002024;Unigene0002129;Unigene0002337;Unigene0002461;Unigene0003194;Unigene0003583;Unigene0003798;Unigene0004042;Unigene0004111;Unigene0004492;Unigene0004692;Unigene0004808;Unigene0004922;Unigene0005326;Unigene0005823;Unigene0005994;Unigene0006050;Unigene0006353;Unigene0006501;Unigene00…
	GO:0044429	mitochondrial part	9	21	0.00431	0.0576877	Unigene0011395;Unigene0032574;Unigene0041553;Unigene0043224;Unigene0043904;Unigene0045307;Unigene0054629;Unigene0059997;Unigene0069894
	GO:0044425	membrane part	104	502	0.00664	0.0825257	Unigene0000448;Unigene0000651;Unigene0000905;Unigene0001588;Unigene0001885;Unigene0002608;Unigene0002638;Unigene0002692;Unigene0003348;Unigene0005327;Unigene0006655;Unigene0006805;Unigene0008452;Unigene0008967;Unigene0009619;Unigene0009634;Unigene0009776;Unigene0009983;Unigene0010534;Unigene0010616;Unigene0010760;Unigene0010788;Unigene0010930;Unigene0010988;Unigene0011317;Unigene0011639;Unigene00…
	GO:0016020	membrane	148	757	0.01127	0.130732	Unigene0000042;Unigene0000448;Unigene0000651;Unigene0000905;Unigene0001588;Unigene0001885;Unigene0002430;Unigene0002608;Unigene0002638;Unigene0002692;Unigene0003214;Unigene0003348;Unigene0005326;Unigene0005327;Unigene0006655;Unigene0006805;Unigene0007140;Unigene0008452;Unigene0008553;Unigene0008755;Unigene0008967;Unigene0009619;Unigene0009634;Unigene0009776;Unigene0009983;Unigene0010534;Unigene00…
	GO:0031224	intrinsic component of membrane	81	389	0.0149	0.159113	Unigene0000448;Unigene0000651;Unigene0000905;Unigene0001588;Unigene0001885;Unigene0002608;Unigene0002638;Unigene0002692;Unigene0003348;Unigene0005327;Unigene0006655;Unigene0006805;Unigene0008967;Unigene0009634;Unigene0010534;Unigene0010760;Unigene0010788;Unigene0010930;Unigene0010988;Unigene0011317;Unigene0011639;Unigene0013164;Unigene0013274;Unigene0015153;Unigene0016714;Unigene0017587;Unigene00…
	GO:0070161	anchoring junction	5	10	0.01576	0.159113	Unigene0000042;Unigene0013161;Unigene0026505;Unigene0033457;Unigene0043375
	GO:0000793	condensed chromosome	3	4	0.01646	0.159113	Unigene0029069;Unigene0055446;Unigene0064602
	GO:0044428	nuclear part	16	56	0.01828	0.167406	Unigene0003583;Unigene0006353;Unigene0006501;Unigene0010967;Unigene0014388;Unigene0022005;Unigene0022266;Unigene0023011;Unigene0027002;Unigene0035480;Unigene0037999;Unigene0040071;Unigene0051923;Unigene0057270;Unigene0059706;Unigene0071116
	GO:0005634	nucleus	16	57	0.02161	0.188007	Unigene0003583;Unigene0006353;Unigene0006501;Unigene0010967;Unigene0014388;Unigene0022005;Unigene0022266;Unigene0023011;Unigene0027002;Unigene0035480;Unigene0037999;Unigene0040071;Unigene0051923;Unigene0057270;Unigene0059706;Unigene0071116
	GO ID	Description	GeneRatio (796)	BgRatio (4216)	pvalue	qvalue	geneID
Molecular Function	GO:0003824	catalytic activity	537	2679	0.0058	0.742083	Unigene0000016;Unigene0000020;Unigene0000108;Unigene0000200;Unigene0000235;Unigene0000338;Unigene0000356;Unigene0000513;Unigene0000584;Unigene0000831;Unigene0000905;Unigene0001182;Unigene0001230;Unigene0001323;Unigene0001424;Unigene0001532;Unigene0001547;Unigene0001626;Unigene0001645;Unigene0001679;Unigene0001683;Unigene0001855;Unigene0001885;Unigene0001962;Unigene0002276;Unigene0002282;Unigene00…
	GO:0016491	oxidoreductase activity	86	363	0.0099	0.742083	Unigene0000200;Unigene0000584;Unigene0001182;Unigene0001855;Unigene0003770;Unigene0004247;Unigene0004320;Unigene0005550;Unigene0006012;Unigene0006918;Unigene0007039;Unigene0007644;Unigene0007921;Unigene0008552;Unigene0009634;Unigene0011282;Unigene0011479;Unigene0011872;Unigene0012295;Unigene0012308;Unigene0012350;Unigene0012801;Unigene0013632;Unigene0018214;Unigene0019036;Unigene0019276;Unigene00…
	GO:0046914	transition metal ion binding	45	173	0.0114	0.742083	Unigene0001532;Unigene0001885;Unigene0002825;Unigene0002963;Unigene0005851;Unigene0007012;Unigene0009799;Unigene0011282;Unigene0011528;Unigene0011613;Unigene0012350;Unigene0013153;Unigene0013851;Unigene0019271;Unigene0019644;Unigene0021545;Unigene0022270;Unigene0022710;Unigene0023419;Unigene0024035;Unigene0026605;Unigene0026606;Unigene0029023;Unigene0030280;Unigene0031165;Unigene0031519;Unigene00…
	GO:0016874	ligase activity	27	98	0.0218	0.742083	Unigene0002276;Unigene0002799;Unigene0006619;Unigene0008552;Unigene0009369;Unigene0010483;Unigene0016545;Unigene0016611;Unigene0020169;Unigene0027975;Unigene0028444;Unigene0032317;Unigene0032318;Unigene0032631;Unigene0034021;Unigene0034359;Unigene0038198;Unigene0038395;Unigene0041553;Unigene0045664;Unigene0046445;Unigene0048395;Unigene0048828;Unigene0057671;Unigene0061719;Unigene0066268;Unigene00…
	GO:0016407	acetyltransferase activity	6	13	0.0228	0.742083	Unigene0014560;Unigene0024107;Unigene0029069;Unigene0032079;Unigene0042543;Unigene0061777
	GO:0015144	carbohydrate transmembrane transporter activity	3	4	0.0231	0.742083	Unigene0011639;Unigene0025766;Unigene0068521
	GO:0017069	snRNA binding	3	4	0.0231	0.742083	Unigene0003332;Unigene0023011;Unigene0023012
	GO:0051119	sugar transmembrane transporter activity	3	4	0.0231	0.742083	Unigene0011639;Unigene0025766;Unigene0068521
	GO:0052689	carboxylic ester hydrolase activity	3	4	0.0231	0.742083	Unigene0028444;Unigene0031605;Unigene0061719
	GO:1901476	carbohydrate transporter activity	3	4	0.0231	0.742083	Unigene0011639;Unigene0025766;Unigene0068521
	GO:0070011	peptidase activity, acting on L-amino acid peptides	34	131	0.0266	0.742083	Unigene0001532;Unigene0001885;Unigene0004042;Unigene0004821;Unigene0006085;Unigene0008756;Unigene0009565;Unigene0009799;Unigene0011728;Unigene0012829;Unigene0013153;Unigene0017571;Unigene0019501;Unigene0019502;Unigene0020409;Unigene0021844;Unigene0024200;Unigene0024605;Unigene0027222;Unigene0031566;Unigene0032353;Unigene0032812;Unigene0033307;Unigene0034632;Unigene0037855;Unigene0041593;Unigene00…
	GO:0016779	nucleotidyltransferase activity	14	44	0.0274	0.742083	Unigene0001962;Unigene0005945;Unigene0009234;Unigene0010277;Unigene0014620;Unigene0018890;Unigene0034906;Unigene0037999;Unigene0050824;Unigene0051923;Unigene0055676;Unigene0057270;Unigene0059706;Unigene0070126
	GO:0016651	oxidoreductase activity, acting on NAD(P)H	12	37	0.0343	0.748675	Unigene0005550;Unigene0009634;Unigene0011282;Unigene0012350;Unigene0020460;Unigene0022609;Unigene0025110;Unigene0037504;Unigene0038510;Unigene0040299;Unigene0042310;Unigene0043044
	GO:0046872	metal ion binding	68	299	0.0474	0.748675	Unigene0001532;Unigene0001885;Unigene0002825;Unigene0002963;Unigene0003418;Unigene0004849;Unigene0005680;Unigene0005851;Unigene0007012;Unigene0008319;Unigene0008552;Unigene0009234;Unigene0009799;Unigene0010967;Unigene0011282;Unigene0011317;Unigene0011528;Unigene0011613;Unigene0012350;Unigene0012801;Unigene0013153;Unigene0013851;Unigene0014699;Unigene0019271;Unigene0019644;Unigene0021545;Unigene00…
	GO:0016885	ligase activity, forming carbon-carbon bonds	3	5	0.0496	0.748675	Unigene0016545;Unigene0016611;Unigene0041553
	GO:0034062	RNA polymerase activity	7	19	0.0513	0.748675	Unigene0001962;Unigene0014620;Unigene0018890;Unigene0037999;Unigene0051923;Unigene0057270;Unigene0070126
	GO:0004386	helicase activity	9	28	0.066	0.748675	Unigene0032445;Unigene0033871;Unigene0039759;Unigene0040343;Unigene0044260;Unigene0045272;Unigene0048433;Unigene0048828;Unigene0049902
	GO:0015291	secondary active transmembrane transporter activity	7	20	0.0665	0.748675	Unigene0003348;Unigene0010534;Unigene0025766;Unigene0029869;Unigene0038228;Unigene0049333;Unigene0068521
	GO:0016875	ligase activity, forming carbon-oxygen bonds	12	41	0.071	0.748675	Unigene0002799;Unigene0006619;Unigene0027975;Unigene0028444;Unigene0034359;Unigene0045664;Unigene0046445;Unigene0048395;Unigene0048828;Unigene0061719;Unigene0066268;Unigene0067537
	GO:0016876	ligase activity, forming aminoacyl-tRNA and related compounds	12	41	0.071	0.748675	Unigene0002799;Unigene0006619;Unigene0027975;Unigene0028444;Unigene0034359;Unigene0045664;Unigene0046445;Unigene0048395;Unigene0048828;Unigene0061719;Unigene0066268;Unigene0067537
	GO ID	Description	GeneRatio (763)	BgRatio (4239)	pvalue	qvalue	geneID
Biological Process	GO:0006807	nitrogen compound metabolic process	168	660	1.1e-07	7.428e-05	Unigene0000108;Unigene0000697;Unigene0001730;Unigene0001962;Unigene0002562;Unigene0002799;Unigene0003570;Unigene0003770;Unigene0003798;Unigene0004492;Unigene0005123;Unigene0005327;Unigene0005550;Unigene0005945;Unigene0006353;Unigene0006619;Unigene0006805;Unigene0006887;Unigene0006916;Unigene0007039;Unigene0007360;Unigene0007921;Unigene0008452;Unigene0008805;Unigene0009124;Unigene0009369;Unigene00…
	GO:0044238	primary metabolic process	305	1352	1.2e-07	7.428e-05	Unigene0000042;Unigene0000462;Unigene0000513;Unigene0000697;Unigene0000905;Unigene0001182;Unigene0001532;Unigene0001730;Unigene0001885;Unigene0001962;Unigene0002276;Unigene0002562;Unigene0002799;Unigene0002833;Unigene0003363;Unigene0003427;Unigene0003570;Unigene0003648;Unigene0003770;Unigene0003798;Unigene0004042;Unigene0004088;Unigene0004492;Unigene0004773;Unigene0005123;Unigene0005157;Unigene00…
	GO:0006725	cellular aromatic compound metabolic process	129	488	5.2e-07	0.000194543	Unigene0000108;Unigene0000697;Unigene0001730;Unigene0001962;Unigene0002562;Unigene0002799;Unigene0003770;Unigene0003798;Unigene0004492;Unigene0005123;Unigene0005327;Unigene0005550;Unigene0005945;Unigene0006353;Unigene0006619;Unigene0006805;Unigene0006887;Unigene0006916;Unigene0007039;Unigene0007921;Unigene0008452;Unigene0008805;Unigene0009124;Unigene0009369;Unigene0009776;Unigene0009982;Unigene00…
	GO:0090304	nucleic acid metabolic process	85	291	8e-07	0.000194543	Unigene0000697;Unigene0001962;Unigene0002799;Unigene0003770;Unigene0003798;Unigene0004492;Unigene0005123;Unigene0006353;Unigene0006619;Unigene0006916;Unigene0007039;Unigene0008805;Unigene0009124;Unigene0009369;Unigene0009982;Unigene0010277;Unigene0010434;Unigene0011420;Unigene0011528;Unigene0011613;Unigene0012449;Unigene0012996;Unigene0014388;Unigene0015076;Unigene0016684;Unigene0018867;Unigene00…
	GO:1901360	organic cyclic compound metabolic process	129	494	1.1e-06	0.000194543	Unigene0000108;Unigene0000697;Unigene0001730;Unigene0001962;Unigene0002562;Unigene0002799;Unigene0003770;Unigene0003798;Unigene0004492;Unigene0005123;Unigene0005327;Unigene0005550;Unigene0005945;Unigene0006353;Unigene0006619;Unigene0006805;Unigene0006887;Unigene0006916;Unigene0007039;Unigene0007921;Unigene0008452;Unigene0008805;Unigene0009124;Unigene0009369;Unigene0009776;Unigene0009982;Unigene00…
	GO:0034641	cellular nitrogen compound metabolic process	145	570	1.1e-06	0.000194543	Unigene0000108;Unigene0000697;Unigene0001730;Unigene0001962;Unigene0002562;Unigene0002799;Unigene0003570;Unigene0003770;Unigene0003798;Unigene0004492;Unigene0005123;Unigene0005327;Unigene0005550;Unigene0005945;Unigene0006353;Unigene0006619;Unigene0006805;Unigene0006887;Unigene0006916;Unigene0007039;Unigene0007360;Unigene0007921;Unigene0008452;Unigene0008805;Unigene0009124;Unigene0009369;Unigene00…
	GO:0046483	heterocycle metabolic process	126	480	1.1e-06	0.000194543	Unigene0000108;Unigene0000697;Unigene0001730;Unigene0001962;Unigene0002562;Unigene0002799;Unigene0003770;Unigene0003798;Unigene0004492;Unigene0005123;Unigene0005327;Unigene0005550;Unigene0005945;Unigene0006353;Unigene0006619;Unigene0006805;Unigene0006887;Unigene0006916;Unigene0007039;Unigene0007921;Unigene0008452;Unigene0008805;Unigene0009124;Unigene0009369;Unigene0009776;Unigene0009982;Unigene00…
	GO:0016070	RNA metabolic process	61	198	5e-06	0.00073042	Unigene0000697;Unigene0001962;Unigene0002799;Unigene0003770;Unigene0003798;Unigene0004492;Unigene0005123;Unigene0006353;Unigene0006619;Unigene0007039;Unigene0008805;Unigene0009369;Unigene0009982;Unigene0010434;Unigene0011420;Unigene0011613;Unigene0014388;Unigene0015076;Unigene0016684;Unigene0019276;Unigene0022005;Unigene0022222;Unigene0022266;Unigene0022710;Unigene0023011;Unigene0024455;Unigene00…
	GO:0044237	cellular metabolic process	358	1685	5.4e-06	0.00073042	Unigene0000042;Unigene0000108;Unigene0000356;Unigene0000462;Unigene0000513;Unigene0000584;Unigene0000697;Unigene0000905;Unigene0001182;Unigene0001243;Unigene0001547;Unigene0001730;Unigene0001775;Unigene0001962;Unigene0002276;Unigene0002337;Unigene0002562;Unigene0002799;Unigene0002833;Unigene0003140;Unigene0003363;Unigene0003427;Unigene0003570;Unigene0003770;Unigene0003798;Unigene0004340;Unigene00…
	GO:0006139	nucleobase-containing compound metabolic process	116	447	5.9e-06	0.00073042	Unigene0000697;Unigene0001730;Unigene0001962;Unigene0002799;Unigene0003770;Unigene0003798;Unigene0004492;Unigene0005123;Unigene0005327;Unigene0005550;Unigene0005945;Unigene0006353;Unigene0006619;Unigene0006805;Unigene0006916;Unigene0007039;Unigene0007921;Unigene0008452;Unigene0008805;Unigene0009124;Unigene0009369;Unigene0009776;Unigene0009982;Unigene0010277;Unigene0010434;Unigene0011381;Unigene00…
	GO:0044260	cellular macromolecule metabolic process	224	1002	3.3e-05	0.003714	Unigene0000042;Unigene0000356;Unigene0000462;Unigene0000513;Unigene0000697;Unigene0000905;Unigene0001243;Unigene0001547;Unigene0001775;Unigene0001962;Unigene0002276;Unigene0002799;Unigene0002833;Unigene0003363;Unigene0003427;Unigene0003570;Unigene0003770;Unigene0003798;Unigene0004492;Unigene0004773;Unigene0005123;Unigene0005157;Unigene0005555;Unigene0006353;Unigene0006540;Unigene0006619;Unigene00…
	GO:0044710	single-organism metabolic process	191	863	0.0003	0.03095	Unigene0000016;Unigene0000042;Unigene0000200;Unigene0000499;Unigene0000584;Unigene0001182;Unigene0001730;Unigene0002562;Unigene0002799;Unigene0003770;Unigene0004247;Unigene0004773;Unigene0005124;Unigene0005149;Unigene0005326;Unigene0005327;Unigene0005550;Unigene0006012;Unigene0006618;Unigene0006619;Unigene0006805;Unigene0006887;Unigene0006918;Unigene0007039;Unigene0007132;Unigene0007140;Unigene00…
	GO:0006886	intracellular protein transport	11	21	0.00036	0.0342831	Unigene0003341;Unigene0009619;Unigene0010967;Unigene0011395;Unigene0013089;Unigene0013274;Unigene0034352;Unigene0039169;Unigene0061073;Unigene0064602;Unigene0071229
	GO:0034613	cellular protein localization	16	39	0.00063	0.051996	Unigene0001356;Unigene0003341;Unigene0009619;Unigene0010967;Unigene0011395;Unigene0013089;Unigene0013274;Unigene0016405;Unigene0030213;Unigene0034352;Unigene0039169;Unigene0040778;Unigene0059162;Unigene0061073;Unigene0064602;Unigene0071229
	GO:0009056	catabolic process	33	106	0.00063	0.051996	Unigene0000462;Unigene0002337;Unigene0003140;Unigene0005124;Unigene0005555;Unigene0007360;Unigene0007921;Unigene0009565;Unigene0009799;Unigene0009864;Unigene0011728;Unigene0020409;Unigene0031460;Unigene0032006;Unigene0033307;Unigene0035739;Unigene0036537;Unigene0037855;Unigene0040071;Unigene0040801;Unigene0041167;Unigene0041553;Unigene0042443;Unigene0042961;Unigene0043849;Unigene0044357;Unigene00…
	GO:0070727	cellular macromolecule localization	16	40	0.00088	0.06809	Unigene0001356;Unigene0003341;Unigene0009619;Unigene0010967;Unigene0011395;Unigene0013089;Unigene0013274;Unigene0016405;Unigene0030213;Unigene0034352;Unigene0039169;Unigene0040778;Unigene0059162;Unigene0061073;Unigene0064602;Unigene0071229
	GO:0009987	cellular process	497	2559	0.00159	0.110044	Unigene0000042;Unigene0000108;Unigene0000356;Unigene0000462;Unigene0000513;Unigene0000584;Unigene0000697;Unigene0000831;Unigene0000905;Unigene0001182;Unigene0001243;Unigene0001306;Unigene0001356;Unigene0001547;Unigene0001683;Unigene0001730;Unigene0001775;Unigene0001885;Unigene0001962;Unigene0002024;Unigene0002276;Unigene0002337;Unigene0002449;Unigene0002461;Unigene0002562;Unigene0002799;Unigene00…
	GO:1901564	organonitrogen compound metabolic process	91	382	0.0016	0.110044	Unigene0000108;Unigene0001730;Unigene0002562;Unigene0002799;Unigene0003570;Unigene0004492;Unigene0005327;Unigene0006619;Unigene0006805;Unigene0006887;Unigene0007360;Unigene0007921;Unigene0008452;Unigene0009419;Unigene0009776;Unigene0011613;Unigene0011865;Unigene0012889;Unigene0013632;Unigene0014856;Unigene0015153;Unigene0016556;Unigene0018363;Unigene0018469;Unigene0019644;Unigene0021536;Unigene00…
	GO:0019538	protein metabolic process	154	701	0.00194	0.125038	Unigene0000042;Unigene0000462;Unigene0000513;Unigene0000905;Unigene0001532;Unigene0001885;Unigene0002276;Unigene0002799;Unigene0002833;Unigene0003363;Unigene0003427;Unigene0003570;Unigene0003648;Unigene0004042;Unigene0004492;Unigene0004773;Unigene0005157;Unigene0005555;Unigene0006085;Unigene0006619;Unigene0006771;Unigene0007328;Unigene0007360;Unigene0008324;Unigene0008553;Unigene0008555;Unigene00…
	GO:1902582	single-organism intracellular transport	15	39	0.00202	0.125038	Unigene0009619;Unigene0010125;Unigene0010963;Unigene0010967;Unigene0011395;Unigene0013274;Unigene0028452;Unigene0034352;Unigene0036622;Unigene0043375;Unigene0043651;Unigene0051805;Unigene0059162;Unigene0061073;Unigene0071229
