# Supplementary material for: Transcriptome Analysis Reveals the Molecular Response to Salinity Challenge in Larvae of the Giant Freshwater Prawn Macrobrachium rosenbergii
Source: Front Physiol. 2022 Apr 29;13:885035. doi: 10.3389/fphys.2022.885035 (PMC9099292; doi:10.3389/fphys.2022.885035)
Supplement: Supplementary file 8 [file Table6.XLS]

## Sheet: S10 VS S16.GO terms
Table S6 The top 20 differentially enriched GO terms in three major functional categories between S10 and S16.
GO terms	GO ID	Description	GeneRatio (329)	BgRatio (2949)	pvalue	qvalue	geneID
Cellular Component	GO:0030529	intracellular ribonucleoprotein complex	176	1055	2.4e-12	1.032e-10	Unigene0000462;Unigene0000498;Unigene0000530;Unigene0000684;Unigene0001190;Unigene0002020;Unigene0002244;Unigene0002461;Unigene0002649;Unigene0003254;Unigene0003396;Unigene0004018;Unigene0004161;Unigene0005797;Unigene0005817;Unigene0005871;Unigene0006191;Unigene0006540;Unigene0008025;Unigene0008427;Unigene0008489;Unigene0008893;Unigene0009154;Unigene0009492;Unigene0010245;Unigene0010334;Unigene00…
	GO:1990904	ribonucleoprotein complex	176	1055	2.4e-12	1.032e-10	Unigene0000462;Unigene0000498;Unigene0000530;Unigene0000684;Unigene0001190;Unigene0002020;Unigene0002244;Unigene0002461;Unigene0002649;Unigene0003254;Unigene0003396;Unigene0004018;Unigene0004161;Unigene0005797;Unigene0005817;Unigene0005871;Unigene0006191;Unigene0006540;Unigene0008025;Unigene0008427;Unigene0008489;Unigene0008893;Unigene0009154;Unigene0009492;Unigene0010245;Unigene0010334;Unigene00…
	GO:0032991	macromolecular complex	221	1491	8e-11	2.29333e-09	Unigene0000462;Unigene0000498;Unigene0000530;Unigene0000684;Unigene0001190;Unigene0002020;Unigene0002244;Unigene0002461;Unigene0002649;Unigene0003254;Unigene0003396;Unigene0003583;Unigene0004018;Unigene0004161;Unigene0004333;Unigene0005215;Unigene0005327;Unigene0005748;Unigene0005797;Unigene0005817;Unigene0005871;Unigene0006050;Unigene0006191;Unigene0006501;Unigene0006540;Unigene0008025;Unigene00…
	GO:0005840	ribosome	68	333	1e-07	1.892e-06	Unigene0000462;Unigene0000684;Unigene0002244;Unigene0002461;Unigene0003254;Unigene0004161;Unigene0005797;Unigene0005817;Unigene0005871;Unigene0009154;Unigene0013474;Unigene0013760;Unigene0014777;Unigene0016591;Unigene0018420;Unigene0018480;Unigene0020458;Unigene0021217;Unigene0021242;Unigene0022784;Unigene0023221;Unigene0023818;Unigene0024186;Unigene0027924;Unigene0028633;Unigene0029376;Unigene00…
	GO:0044391	ribosomal subunit	62	293	1.1e-07	1.892e-06	Unigene0000462;Unigene0000684;Unigene0002244;Unigene0002461;Unigene0003254;Unigene0004161;Unigene0005797;Unigene0005817;Unigene0005871;Unigene0009154;Unigene0013474;Unigene0013760;Unigene0016591;Unigene0018420;Unigene0018480;Unigene0020458;Unigene0021217;Unigene0021242;Unigene0022784;Unigene0023221;Unigene0023818;Unigene0024186;Unigene0027924;Unigene0028633;Unigene0029376;Unigene0029426;Unigene00…
	GO:0043228	non-membrane-bounded organelle	108	665	3.5e-06	4.3e-05	Unigene0000462;Unigene0000684;Unigene0002244;Unigene0002461;Unigene0003194;Unigene0003254;Unigene0004143;Unigene0004161;Unigene0004333;Unigene0005215;Unigene0005797;Unigene0005817;Unigene0005871;Unigene0006050;Unigene0009154;Unigene0009860;Unigene0009961;Unigene0013474;Unigene0013760;Unigene0014777;Unigene0015926;Unigene0016591;Unigene0016739;Unigene0016837;Unigene0018420;Unigene0018480;Unigene00…
	GO:0043232	intracellular non-membrane-bounded organelle	108	665	3.5e-06	4.3e-05	Unigene0000462;Unigene0000684;Unigene0002244;Unigene0002461;Unigene0003194;Unigene0003254;Unigene0004143;Unigene0004161;Unigene0004333;Unigene0005215;Unigene0005797;Unigene0005817;Unigene0005871;Unigene0006050;Unigene0009154;Unigene0009860;Unigene0009961;Unigene0013474;Unigene0013760;Unigene0014777;Unigene0015926;Unigene0016591;Unigene0016739;Unigene0016837;Unigene0018420;Unigene0018480;Unigene00…
	GO:0005622	intracellular	278	2236	3.4e-05	0.0003655	Unigene0000462;Unigene0000498;Unigene0000530;Unigene0000684;Unigene0001190;Unigene0002019;Unigene0002020;Unigene0002244;Unigene0002461;Unigene0002649;Unigene0002799;Unigene0002910;Unigene0002976;Unigene0003057;Unigene0003194;Unigene0003254;Unigene0003396;Unigene0003494;Unigene0003583;Unigene0003712;Unigene0004018;Unigene0004143;Unigene0004161;Unigene0004333;Unigene0005215;Unigene0005506;Unigene00…
	GO:0044446	intracellular organelle part	89	557	7.4e-05	0.000707111	Unigene0000462;Unigene0000684;Unigene0002244;Unigene0002461;Unigene0003254;Unigene0003583;Unigene0004161;Unigene0004333;Unigene0005215;Unigene0005797;Unigene0005817;Unigene0005871;Unigene0006050;Unigene0006501;Unigene0009154;Unigene0009961;Unigene0013474;Unigene0013760;Unigene0015153;Unigene0015926;Unigene0016591;Unigene0018420;Unigene0018480;Unigene0020458;Unigene0020498;Unigene0021217;Unigene00…
	GO:0005737	cytoplasm	80	510	0.00037	0.003182	Unigene0000462;Unigene0000684;Unigene0002244;Unigene0002461;Unigene0003254;Unigene0003583;Unigene0004161;Unigene0005797;Unigene0005817;Unigene0005871;Unigene0006501;Unigene0009154;Unigene0013474;Unigene0013760;Unigene0014777;Unigene0016591;Unigene0017083;Unigene0017827;Unigene0018420;Unigene0018480;Unigene0020458;Unigene0021217;Unigene0021242;Unigene0022784;Unigene0023221;Unigene0023818;Unigene00…
	GO:0044422	organelle part	89	589	0.00061	0.00473	Unigene0000462;Unigene0000684;Unigene0002244;Unigene0002461;Unigene0003254;Unigene0003583;Unigene0004161;Unigene0004333;Unigene0005215;Unigene0005797;Unigene0005817;Unigene0005871;Unigene0006050;Unigene0006501;Unigene0009154;Unigene0009961;Unigene0013474;Unigene0013760;Unigene0015153;Unigene0015926;Unigene0016591;Unigene0018420;Unigene0018480;Unigene0020458;Unigene0020498;Unigene0021217;Unigene00…
	GO:0044444	cytoplasmic part	78	503	0.00066	0.00473	Unigene0000462;Unigene0000684;Unigene0002244;Unigene0002461;Unigene0003254;Unigene0003583;Unigene0004161;Unigene0005797;Unigene0005817;Unigene0005871;Unigene0006501;Unigene0009154;Unigene0013474;Unigene0013760;Unigene0014777;Unigene0016591;Unigene0018420;Unigene0018480;Unigene0020458;Unigene0021217;Unigene0021242;Unigene0022784;Unigene0023221;Unigene0023818;Unigene0024186;Unigene0024640;Unigene00…
	GO:0044424	intracellular part	258	2093	0.00078	0.00516	Unigene0000462;Unigene0000498;Unigene0000530;Unigene0000684;Unigene0001190;Unigene0002020;Unigene0002244;Unigene0002461;Unigene0002649;Unigene0002799;Unigene0003194;Unigene0003254;Unigene0003396;Unigene0003494;Unigene0003583;Unigene0003712;Unigene0004018;Unigene0004143;Unigene0004161;Unigene0004333;Unigene0005215;Unigene0005797;Unigene0005817;Unigene0005871;Unigene0006050;Unigene0006191;Unigene00…
	GO:0005623	cell	281	2355	0.00383	0.0219587	Unigene0000462;Unigene0000498;Unigene0000530;Unigene0000684;Unigene0001190;Unigene0002019;Unigene0002020;Unigene0002244;Unigene0002461;Unigene0002649;Unigene0002799;Unigene0002910;Unigene0002976;Unigene0003057;Unigene0003194;Unigene0003254;Unigene0003396;Unigene0003494;Unigene0003583;Unigene0003712;Unigene0004018;Unigene0004143;Unigene0004161;Unigene0004333;Unigene0005215;Unigene0005506;Unigene00…
	GO:0044464	cell part	281	2355	0.00383	0.0219587	Unigene0000462;Unigene0000498;Unigene0000530;Unigene0000684;Unigene0001190;Unigene0002019;Unigene0002020;Unigene0002244;Unigene0002461;Unigene0002649;Unigene0002799;Unigene0002910;Unigene0002976;Unigene0003057;Unigene0003194;Unigene0003254;Unigene0003396;Unigene0003494;Unigene0003583;Unigene0003712;Unigene0004018;Unigene0004143;Unigene0004161;Unigene0004333;Unigene0005215;Unigene0005506;Unigene00…
	GO:0005694	chromosome	14	59	0.00429	0.0230587	Unigene0002461;Unigene0004333;Unigene0005215;Unigene0006050;Unigene0015926;Unigene0030213;Unigene0033690;Unigene0052620;Unigene0054036;Unigene0058024;Unigene0058918;Unigene0064602;Unigene0067523;Unigene0069395
	GO:0015934	large ribosomal subunit	15	66	0.00489	0.0247376	Unigene0000462;Unigene0002461;Unigene0020458;Unigene0023221;Unigene0027924;Unigene0029376;Unigene0029426;Unigene0047362;Unigene0047367;Unigene0054036;Unigene0056877;Unigene0058918;Unigene0061115;Unigene0063722;Unigene0064074
	GO:0000785	chromatin	8	31	0.01735	0.0828944	Unigene0004333;Unigene0005215;Unigene0006050;Unigene0015926;Unigene0030213;Unigene0033690;Unigene0052620;Unigene0069395
	GO:0044427	chromosomal part	9	38	0.02078	0.090085	Unigene0004333;Unigene0005215;Unigene0006050;Unigene0015926;Unigene0030213;Unigene0033690;Unigene0052620;Unigene0064602;Unigene0069395
	GO:0033177	proton-transporting two-sector ATPase complex, proton-transporting domain	8	32	0.02095	0.090085	Unigene0005327;Unigene0015153;Unigene0020293;Unigene0022183;Unigene0022936;Unigene0035810;Unigene0035869;Unigene0064448
	GO ID	Description	GeneRatio (414)	BgRatio (4216)	pvalue	qvalue	geneID
Molecular Function	GO:0005198	structural molecule activity	71	354	7.9e-10	1.5168e-07	Unigene0000462;Unigene0002244;Unigene0002461;Unigene0003254;Unigene0004018;Unigene0004161;Unigene0005797;Unigene0005817;Unigene0006191;Unigene0009154;Unigene0013760;Unigene0016591;Unigene0016837;Unigene0018420;Unigene0020458;Unigene0021217;Unigene0021242;Unigene0022784;Unigene0023221;Unigene0023818;Unigene0027924;Unigene0028633;Unigene0029376;Unigene0029426;Unigene0030046;Unigene0030408;Unigene00…
	GO:0003723	RNA binding	36	215	0.0008	0.0768	Unigene0000356;Unigene0001547;Unigene0004161;Unigene0005797;Unigene0006191;Unigene0009419;Unigene0016677;Unigene0019319;Unigene0021217;Unigene0021242;Unigene0021536;Unigene0024815;Unigene0025852;Unigene0026061;Unigene0026247;Unigene0029376;Unigene0029607;Unigene0029877;Unigene0035197;Unigene0035198;Unigene0045032;Unigene0049920;Unigene0052020;Unigene0056183;Unigene0056623;Unigene0057921;Unigene00…
	GO:0016903	oxidoreductase activity, acting on the aldehyde or oxo group of donors	10	41	0.0051	0.2784	Unigene0000584;Unigene0009790;Unigene0012295;Unigene0029303;Unigene0041727;Unigene0045307;Unigene0051507;Unigene0060857;Unigene0064355;Unigene0071750
	GO:0016209	antioxidant activity	6	18	0.0058	0.2784	Unigene0003315;Unigene0025235;Unigene0026484;Unigene0034873;Unigene0053478;Unigene0071129
	GO:0003676	nucleic acid binding	61	478	0.0155	0.5248	Unigene0000356;Unigene0001547;Unigene0003194;Unigene0003254;Unigene0004143;Unigene0004161;Unigene0004333;Unigene0005215;Unigene0005797;Unigene0005817;Unigene0006050;Unigene0006191;Unigene0007012;Unigene0009419;Unigene0009860;Unigene0015926;Unigene0016677;Unigene0019319;Unigene0021217;Unigene0021242;Unigene0021536;Unigene0023818;Unigene0024815;Unigene0025852;Unigene0026061;Unigene0026247;Unigene00…
	GO:0046983	protein dimerization activity	17	100	0.0164	0.5248	Unigene0003194;Unigene0004143;Unigene0004333;Unigene0005215;Unigene0006050;Unigene0009860;Unigene0009961;Unigene0015926;Unigene0030213;Unigene0033690;Unigene0043343;Unigene0051554;Unigene0052620;Unigene0053461;Unigene0055539;Unigene0069395;Unigene0070198
	GO:0070011	peptidase activity, acting on L-amino acid peptides	20	131	0.0292	0.5892	Unigene0009565;Unigene0016894;Unigene0017571;Unigene0021861;Unigene0026541;Unigene0032812;Unigene0033307;Unigene0036227;Unigene0041593;Unigene0042529;Unigene0045390;Unigene0046291;Unigene0047976;Unigene0049619;Unigene0057377;Unigene0058028;Unigene0062174;Unigene0065977;Unigene0070115;Unigene0071089
	GO:0008233	peptidase activity	26	190	0.0486	0.5892	Unigene0006425;Unigene0006832;Unigene0009417;Unigene0009565;Unigene0016894;Unigene0017571;Unigene0021861;Unigene0026541;Unigene0028932;Unigene0032812;Unigene0033307;Unigene0036227;Unigene0040728;Unigene0041593;Unigene0042529;Unigene0045390;Unigene0046291;Unigene0047976;Unigene0049619;Unigene0057377;Unigene0058028;Unigene0062174;Unigene0065977;Unigene0067407;Unigene0070115;Unigene0071089
	GO:0004497	monooxygenase activity	2	4	0.0505	0.5892	Unigene0019644;Unigene0035741
	GO:0004601	peroxidase activity	2	4	0.0505	0.5892	Unigene0025235;Unigene0034873
	GO:0009055	electron carrier activity	2	4	0.0505	0.5892	Unigene0032574;Unigene0034873
	GO:0016684	oxidoreductase activity, acting on peroxide as acceptor	2	4	0.0505	0.5892	Unigene0025235;Unigene0034873
	GO:0016714	oxidoreductase activity, acting on paired donors, with incorporation or reduction of molecular oxygen, reduced pteridine as one donor, and incorporation of one atom of oxygen	2	4	0.0505	0.5892	Unigene0019644;Unigene0035741
	GO:0016836	hydro-lyase activity	5	22	0.0578	0.5892	Unigene0002286;Unigene0002703;Unigene0020020;Unigene0057135;Unigene0060891
	GO:0015077	monovalent inorganic cation transmembrane transporter activity	11	67	0.0597	0.5892	Unigene0005327;Unigene0009776;Unigene0015153;Unigene0020293;Unigene0022183;Unigene0022936;Unigene0035810;Unigene0035869;Unigene0039000;Unigene0042547;Unigene0058802
	GO:0016868	intramolecular transferase activity, phosphotransferases	3	10	0.0669	0.5892	Unigene0002295;Unigene0023516;Unigene0067832
	GO:0016835	carbon-oxygen lyase activity	5	23	0.0681	0.5892	Unigene0002286;Unigene0002703;Unigene0020020;Unigene0057135;Unigene0060891
	GO:0008135	translation factor activity, RNA binding	18	129	0.078	0.5892	Unigene0000356;Unigene0001547;Unigene0009419;Unigene0016677;Unigene0019319;Unigene0021536;Unigene0024815;Unigene0025852;Unigene0026247;Unigene0029607;Unigene0029877;Unigene0035197;Unigene0035198;Unigene0045032;Unigene0049920;Unigene0056183;Unigene0057921;Unigene0061893
	GO:0016840	carbon-nitrogen lyase activity	2	5	0.0787	0.5892	Unigene0035613;Unigene0044425
	GO:0031406	carboxylic acid binding	2	5	0.0787	0.5892	Unigene0019644;Unigene0035741
	GO ID	Description	GeneRatio (419)	BgRatio (4239)	pvalue	qvalue	geneID
Biological Process	GO:0010467	gene expression	156	1193	1.3e-05	0.00962	Unigene0000462;Unigene0000498;Unigene0000530;Unigene0000684;Unigene0001190;Unigene0002020;Unigene0002461;Unigene0002799;Unigene0003254;Unigene0003396;Unigene0004018;Unigene0004161;Unigene0005797;Unigene0005817;Unigene0005871;Unigene0006191;Unigene0007012;Unigene0008025;Unigene0008427;Unigene0008489;Unigene0008893;Unigene0009154;Unigene0009419;Unigene0009492;Unigene0010245;Unigene0010334;Unigene00…
	GO:0008152	metabolic process	345	3150	2.7e-05	0.00999	Unigene0000016;Unigene0000036;Unigene0000089;Unigene0000337;Unigene0000356;Unigene0000462;Unigene0000498;Unigene0000513;Unigene0000530;Unigene0000584;Unigene0000684;Unigene0001078;Unigene0001190;Unigene0001547;Unigene0002020;Unigene0002286;Unigene0002339;Unigene0002461;Unigene0002703;Unigene0002799;Unigene0003254;Unigene0003315;Unigene0003396;Unigene0003494;Unigene0004018;Unigene0004161;Unigene00…
	GO:0071704	organic substance metabolic process	279	2461	0.0001	0.0246667	Unigene0000036;Unigene0000356;Unigene0000462;Unigene0000498;Unigene0000513;Unigene0000530;Unigene0000584;Unigene0000684;Unigene0001078;Unigene0001190;Unigene0001547;Unigene0002020;Unigene0002286;Unigene0002339;Unigene0002461;Unigene0002703;Unigene0002799;Unigene0003254;Unigene0003396;Unigene0003494;Unigene0004018;Unigene0004161;Unigene0004450;Unigene0005327;Unigene0005748;Unigene0005797;Unigene00…
	GO:0006090	pyruvate metabolic process	14	49	0.00018	0.0333	Unigene0002286;Unigene0002703;Unigene0009790;Unigene0010188;Unigene0013115;Unigene0020020;Unigene0021343;Unigene0023516;Unigene0029303;Unigene0057135;Unigene0060857;Unigene0060891;Unigene0067832;Unigene0071750
	GO:0051231	spindle elongation	16	62	0.00023	0.03404	Unigene0002244;Unigene0002461;Unigene0023221;Unigene0027924;Unigene0029426;Unigene0030046;Unigene0040944;Unigene0040945;Unigene0052991;Unigene0054036;Unigene0056877;Unigene0058024;Unigene0058918;Unigene0061115;Unigene0063722;Unigene0064074
	GO:0071822	protein complex subunit organization	36	210	0.00057	0.0430296	Unigene0002244;Unigene0002461;Unigene0016837;Unigene0023221;Unigene0027924;Unigene0029426;Unigene0030046;Unigene0030408;Unigene0034190;Unigene0035197;Unigene0035198;Unigene0040187;Unigene0040944;Unigene0040945;Unigene0042105;Unigene0042956;Unigene0047015;Unigene0049367;Unigene0049962;Unigene0050065;Unigene0050066;Unigene0050068;Unigene0052991;Unigene0054036;Unigene0055539;Unigene0056238;Unigene00…
	GO:0007051	spindle organization	17	74	0.00067	0.0430296	Unigene0002244;Unigene0002461;Unigene0023221;Unigene0027924;Unigene0029426;Unigene0030046;Unigene0034190;Unigene0040944;Unigene0040945;Unigene0052991;Unigene0054036;Unigene0056877;Unigene0058024;Unigene0058918;Unigene0061115;Unigene0063722;Unigene0064074
	GO:0042278	purine nucleoside metabolic process	11	38	0.00079	0.0430296	Unigene0005327;Unigene0005748;Unigene0009776;Unigene0014856;Unigene0015153;Unigene0020293;Unigene0035613;Unigene0035810;Unigene0035869;Unigene0042547;Unigene0061563
	GO:0042451	purine nucleoside biosynthetic process	11	38	0.00079	0.0430296	Unigene0005327;Unigene0005748;Unigene0009776;Unigene0014856;Unigene0015153;Unigene0020293;Unigene0035613;Unigene0035810;Unigene0035869;Unigene0042547;Unigene0061563
	GO:0046128	purine ribonucleoside metabolic process	11	38	0.00079	0.0430296	Unigene0005327;Unigene0005748;Unigene0009776;Unigene0014856;Unigene0015153;Unigene0020293;Unigene0035613;Unigene0035810;Unigene0035869;Unigene0042547;Unigene0061563
	GO:0046129	purine ribonucleoside biosynthetic process	11	38	0.00079	0.0430296	Unigene0005327;Unigene0005748;Unigene0009776;Unigene0014856;Unigene0015153;Unigene0020293;Unigene0035613;Unigene0035810;Unigene0035869;Unigene0042547;Unigene0061563
	GO:0009126	purine nucleoside monophosphate metabolic process	11	39	0.001	0.0430296	Unigene0005327;Unigene0005748;Unigene0009776;Unigene0014856;Unigene0015153;Unigene0020293;Unigene0035613;Unigene0035810;Unigene0035869;Unigene0042547;Unigene0061563
	GO:0009127	purine nucleoside monophosphate biosynthetic process	11	39	0.001	0.0430296	Unigene0005327;Unigene0005748;Unigene0009776;Unigene0014856;Unigene0015153;Unigene0020293;Unigene0035613;Unigene0035810;Unigene0035869;Unigene0042547;Unigene0061563
	GO:0009167	purine ribonucleoside monophosphate metabolic process	11	39	0.001	0.0430296	Unigene0005327;Unigene0005748;Unigene0009776;Unigene0014856;Unigene0015153;Unigene0020293;Unigene0035613;Unigene0035810;Unigene0035869;Unigene0042547;Unigene0061563
	GO:0009168	purine ribonucleoside monophosphate biosynthetic process	11	39	0.001	0.0430296	Unigene0005327;Unigene0005748;Unigene0009776;Unigene0014856;Unigene0015153;Unigene0020293;Unigene0035613;Unigene0035810;Unigene0035869;Unigene0042547;Unigene0061563
	GO:0009156	ribonucleoside monophosphate biosynthetic process	11	40	0.00126	0.0430296	Unigene0005327;Unigene0005748;Unigene0009776;Unigene0014856;Unigene0015153;Unigene0020293;Unigene0035613;Unigene0035810;Unigene0035869;Unigene0042547;Unigene0061563
	GO:0009161	ribonucleoside monophosphate metabolic process	11	40	0.00126	0.0430296	Unigene0005327;Unigene0005748;Unigene0009776;Unigene0014856;Unigene0015153;Unigene0020293;Unigene0035613;Unigene0035810;Unigene0035869;Unigene0042547;Unigene0061563
	GO:0006754	ATP biosynthetic process	10	35	0.00151	0.0430296	Unigene0005327;Unigene0005748;Unigene0009776;Unigene0014856;Unigene0015153;Unigene0020293;Unigene0035810;Unigene0035869;Unigene0042547;Unigene0061563
	GO:0009144	purine nucleoside triphosphate metabolic process	10	35	0.00151	0.0430296	Unigene0005327;Unigene0005748;Unigene0009776;Unigene0014856;Unigene0015153;Unigene0020293;Unigene0035810;Unigene0035869;Unigene0042547;Unigene0061563
	GO:0009145	purine nucleoside triphosphate biosynthetic process	10	35	0.00151	0.0430296	Unigene0005327;Unigene0005748;Unigene0009776;Unigene0014856;Unigene0015153;Unigene0020293;Unigene0035810;Unigene0035869;Unigene0042547;Unigene0061563
