# Supplementary material for: Transcriptome Analysis Reveals the Molecular Response to Salinity Challenge in Larvae of the Giant Freshwater Prawn Macrobrachium rosenbergii
Source: Front Physiol. 2022 Apr 29;13:885035. doi: 10.3389/fphys.2022.885035 (PMC9099292; doi:10.3389/fphys.2022.885035)
Supplement: Supplementary file 9 [file Table4.XLSX]

## Sheet: Sheet1
Table S4 Identification of differentially expressed genes between S13 VS S16.
GeneID	S13-1_rpkm	S13-2_rpkm	S13-3_rpkm	S16-1_rpkm	S16-2_rpkm	S16-3_rpkm	log2 Ratio(T3/T2)	Pvalue	FDR	significant
Unigene0006289	0	0	0	2.0085	4.931	3.1868	11.7209	1.70791e-08	9.88524e-06	up
Unigene0030565	0	0	0	1.1311	3.0589	3.561	11.3352	1.0711e-05	0.0013851	up
Unigene0003555	0	0	0	1.1717	3.4305	2.3239	11.1729	8.47021e-10	8.21496e-07	up
Unigene0022989	0	0	0	2.1589	1.8718	2.2601	11.0341	2.02643e-12	9.08981e-09	up
Unigene0048906	0	0	0	0.8724	2.6773	2.3895	10.9511	5.31537e-06	0.000838427	up
Unigene0046457	0	0	0	1.8498	2.2613	1.4157	10.8473	2.09305e-10	2.58997e-07	up
Unigene0031761	0	0	0	0.6955	2.5761	2.2171	10.8373	1.14162e-05	0.00144504	up
Unigene0033544	0	0	0	1.6835	3.6343	0	10.7917	0.000261003	0.0131824	up
Unigene0056623	0	0	0	2.678	1.587	0.9105	10.7525	4.708e-05	0.00410749	up
Unigene0017094	0	0	0	1.3975	1.9718	1.5398	10.6763	5.67509e-05	0.00466019	up
Unigene0059745	0	0	0	1.7694	1.7096	1.2352	10.6178	4.22212e-06	0.000706344	up
Unigene0006124	0	0	0	1.3901	1.7807	1.5202	10.6107	2.98235e-06	0.000553762	up
Unigene0048902	0	0	0	1.7576	1.9632	0.9222	10.5959	3.4225e-05	0.0032751	up
Unigene0027349	0	0	0	0.3125	1.4879	2.8035	10.5837	5.68674e-05	0.00466443	up
Unigene0033545	0	0	0	1.4748	3.1213	0	10.5812	0.00180966	0.0419641	up
Unigene0047492	0	0	0	1.1753	2.7363	0.333	10.4665	0.000636995	0.0226884	up
Unigene0056409	0	0	0	1.6204	1.2575	1.3264	10.4527	8.4174e-05	0.00608989	up
Unigene0052201	0	0	0	0.6103	1.0979	2.4208	10.4266	8.31659e-06	0.00115228	up
Unigene0063561	0	0	0	0.6128	1.1117	2.3977	10.4242	7.98205e-05	0.00585758	up
Unigene0009326	0	0	0	1.1159	1.6729	1.3174	10.4186	4.22178e-05	0.0038354	up
Unigene0063059	0	0	0	1.4143	0.6735	2.0037	10.4135	1.32873e-05	0.00163854	up
Unigene0067865	0	0	0	1.5353	2.0889	0.4661	10.413	5.00914e-06	0.000802468	up
Unigene0016802	0	0	0	0.2208	1.7521	2.085	10.4016	0.000678918	0.0235741	up
Unigene0025377	0	0	0	1.07	1.0293	1.9292	10.3911	7.46945e-05	0.00563704	up
Unigene0035440	0	0	0	1.097	1.0779	1.8501	10.3898	1.91511e-05	0.00215773	up
Unigene0064071	0	0	0	1.527	0.9595	1.4873	10.3713	3.80933e-07	0.000113442	up
Unigene0057865	0	0	0	1.8558	1.0212	1.0516	10.3548	1.57709e-05	0.00187087	up
Unigene0015694	0	0	0	1.141	1.8715	0.916	10.3548	2.62179e-06	0.000506622	up
Unigene0027628	0	0	0	0.3921	2.282	1.1109	10.3011	0.000329329	0.0153182	up
Unigene0071180	0	0	0	1.1241	1.487	1.1502	10.2921	6.53296e-05	0.0051275	up
Unigene0062166	0	0	0	1.2582	0.8616	1.5379	10.2518	2.35658e-05	0.00249232	up
Unigene0052848	0	0	0	2.2697	0.3558	1.0321	10.2517	0.000196722	0.0109278	up
Unigene0045389	0	0	0	0.4574	1.6942	1.4041	10.211	0.000582311	0.0215068	up
Unigene0053664	0	0	0	0.8238	1.585	1.1317	10.2048	3.37897e-05	0.00323777	up
Unigene0025506	0	0	0	0.6915	1.2544	1.586	10.2013	0.000195416	0.010889	up
Unigene0003424	0	0	0	2.4094	0.2488	0.8325	10.1843	7.14299e-05	0.00548879	up
Unigene0023623	0	0	0	1.0741	0.5166	1.8444	10.1612	0.000302783	0.0145259	up
Unigene0062116	0	0	0	0.8754	1.544	1.0105	10.159	0.000167431	0.00978546	up
Unigene0057506	0	0	0	0.8094	0.3894	2.224	10.156	0.000137275	0.00857463	up
Unigene0057806	0	0	0	0.677	1.4328	1.2788	10.1415	0.000422986	0.0178929	up
Unigene0065933	0	0	0	1.8396	0.3894	1.1583	10.141	0.00111635	0.0318493	up
Unigene0070940	0	0	0	1.6186	0.3606	1.3678	10.1237	0.000223598	0.0118959	up
Unigene0015492	0	0	0	0.2907	1.8457	1.1897	10.1147	0.000620643	0.0223325	up
Unigene0025773	0	0	0	0.3627	1.6631	1.2559	10.0953	0.0012802	0.0345105	up
Unigene0013314	0	0	0	0.2217	1.0558	1.9894	10.0887	0.001602	0.0391605	up
Unigene0015356	0	0	0	1.1583	0.1022	2.0057	10.0884	0.00147528	0.0372556	up
Unigene0028202	0	0	0	0.5904	1.2496	1.394	10.0741	0.000289809	0.0141301	up
Unigene0021707	0	0	0	1.1082	0.8529	1.2369	10.058	0.00027593	0.01365	up
Unigene0015695	0	0	0	1.2048	1.0928	0.8941	10.0551	9.98597e-05	0.00680743	up
Unigene0065744	0	0	0	1.4039	1.1142	0.663	10.0503	0.000705383	0.0242458	up
Unigene0023875	0	0	0	0.6107	0.6462	1.8951	10.0371	0.000293867	0.0142473	up
Unigene0052384	0	0	0	0.3588	1.5189	1.2709	10.0355	0.000377528	0.0167772	up
Unigene0068611	0	0	0	0.6979	1.2002	1.2359	10.0288	0.000164374	0.00969643	up
Unigene0017007	0	0	0	1.1684	1.4613	0.5016	10.0276	0.000633247	0.0226238	up
Unigene0064797	0	0	0	0.3951	1.6726	1.0263	10.0103	0.000639564	0.022701	up
Unigene0060184	0	0	0	1.011	1.5454	0.5305	10.007	0.00088144	0.0275236	up
Unigene0070455	0	0	0	1.1863	0.8788	1.0084	10.0007	0.000679965	0.0235754	up
Unigene0064637	0	0	0	1.0757	1.366	0.6096	9.99025	0.000616046	0.0222756	up
Unigene0062975	0	0	0	0.6783	1.2305	1.0982	9.96915	0.00031801	0.0149406	up
Unigene0022384	0	0	0	0.5027	1.862	0.5935	9.94554	0.00215941	0.0462011	up
Unigene0015822	0	0	0	0.3921	1.4522	1.1109	9.94408	0.000668887	0.023372	up
Unigene0071423	0	0	0	0.7313	0.995	1.1841	9.92204	0.000506892	0.0198309	up
Unigene0033056	0	0	0	0.4467	1.2605	1.1953	9.91812	0.000159967	0.00952764	up
Unigene0042506	0	0	0	1.2166	0.6867	0.9959	9.91648	0.00015911	0.00948446	up
Unigene0072196	0	0	0	0.7253	0.7676	1.3701	9.89835	0.00120591	0.0334551	up
Unigene0016958	0	0	0	0.949	0.7532	1.1204	9.87785	0.00102122	0.0300012	up
Unigene0017917	0	0	0	1.3638	0.333	1.0899	9.85938	0.00117094	0.0329164	up
Unigene0057411	0	0	0	0.8343	1.009	0.9005	9.837	0.00118121	0.0330482	up
Unigene0070390	0	0	0	1.3925	1.0202	0.3035	9.82241	0.00175376	0.0412689	up
Unigene0059859	0	0	0	0.3715	1.0484	1.2866	9.81725	0.00239719	0.0489066	up
Unigene0053919	0	0	0	0.9274	1.2267	0.5474	9.81458	0.00150169	0.0377105	up
Unigene0070472	0	0	0	0.9718	1.0283	0.6883	9.80757	0.00152131	0.0380964	up
Unigene0026881	0	0	0	0.9702	1.0267	0.6872	9.80526	0.000204082	0.0111639	up
Unigene0023921	0	0	0	1.2089	0.3198	1.1418	9.79793	0.0011488	0.0324731	up
Unigene0013595	0	0	0	1.2467	0.2399	1.1774	9.79442	0.0023422	0.0483274	up
Unigene0059963	0	0	0	0.4836	1.0234	1.1418	9.78616	0.00190586	0.0431358	up
Unigene0067058	0	0	0	0.7933	1.0794	0.7493	9.77149	0.00124506	0.0341294	up
Unigene0062902	0	0	0	1.0155	0.8792	0.6975	9.755	0.000483399	0.0192635	up
Unigene0022627	0	0	0	0.9653	0.6129	1.0028	9.74875	0.000618732	0.022326	up
Unigene0070060	0	0	0	1.3416	0.546	0.6823	9.74253	0.00117701	0.0329848	up
Unigene0066906	0	0	0	0.3576	0.9081	1.2833	9.73075	0.000299139	0.0144089	up
Unigene0057244	0	0	0	0.5904	0.4998	1.4498	9.72565	0.00237461	0.048707	up
Unigene0060848	0	0	0	1.0001	0.3256	0.8719	9.51675	0.000787336	0.0258236	up
Unigene0015239	0	0	0	1.0009	0.2889	0.6875	9.36435	0.00234515	0.0483654	up
Unigene0061713	0	0	0	0.2336	0.7417	0.9561	9.33047	0.00162458	0.0394775	up
Unigene0021291	0	0	0	0.6695	0.5904	0.527	9.21828	0.000225228	0.0119384	up
Unigene0033008	0	0	0	0.8447	0.1986	0.4432	8.95274	0.00065058	0.0229671	up
Unigene0032251	0	0	0	0.5919	0.6264	0.2485	8.93349	0.0020153	0.0444631	up
Unigene0028848	0	0	0	0.2301	0.3958	0.394	8.40925	1.69907e-06	0.000364006	up
Unigene0064871	0	0	0	0.2422	0.1708	0.4956	8.24254	0.00186832	0.0428194	up
Unigene0017506	0	0.0367	0	1.9014	3.8379	4.7888	8.16425	8.96995e-12	2.29919e-08	up
Unigene0017428	0	0	0	0.1377	0.0972	0.2601	7.36632	0.00208442	0.0452644	up
Unigene0044802	0	0.1071	0	2.2612	3.9156	5.8244	6.80808	1.66046e-09	1.45331e-06	up
Unigene0062696	0	0.0787	0	1.9645	3.9978	1.8554	6.63424	7.43623e-07	0.000192671	up
Unigene0037918	0.1021	0	0	0	9.3727	0.5782	6.60677	0.000439152	0.0182607	up
Unigene0061355	0	0	0.0743	3.8713	1.4969	1.8282	6.59777	1.67317e-06	0.000362207	up
Unigene0000217	0	0.0713	0	3.4214	1.8103	1.4541	6.55105	1.07984e-08	6.98197e-06	up
Unigene0009617	0.1116	1.9059	0.3562	38.1029	87.8203	71.4257	6.37747	8.20044e-13	4.2039e-09	up
Unigene0045624	0	0.0931	0	1.1621	3.6893	2.6172	6.32591	6.56294e-06	0.000964866	up
Unigene0003720	0.111	0.2774	0.0886	0.7101	17.425	19.7015	6.30965	2.61231e-08	1.45337e-05	up
Unigene0006062	0	0.0692	0.3316	7.0446	13.2921	8.4108	6.16441	3.48593e-12	1.31676e-08	up
Unigene0051038	0.0527	0.0439	0	0.9699	2.8115	2.7482	6.07883	1.05598e-07	4.09044e-05	up
Unigene0037866	0	0	0.1215	4.1399	2.1905	1.15	5.94409	2.16613e-06	0.000436695	up
Unigene0071948	0	0.0852	0	1.717	1.8602	1.4672	5.88769	3.58258e-07	0.000108682	up
Unigene0025774	0	0.0972	0	0.56	3.1606	2.0275	5.88599	0.000124265	0.00798215	up
Unigene0015585	0	0	0.0918	1.2877	2.1415	1.7375	5.81461	5.10995e-05	0.00436597	up
Unigene0048174	1.0329	1.1475	0.4121	32.9315	59.5877	49.6446	5.77707	1.96873e-19	1.41296e-14	up
Unigene0024847	0	0	0.0724	1.4507	1.3049	1.1646	5.75879	5.61358e-05	0.00462556	up
Unigene0040503	0	0	0.106	1.2747	3.597	0.8026	5.74231	0.000261338	0.01319	up
Unigene0000601	0.1768	0	0	2.6165	2.1702	4.4748	5.71106	4.67797e-07	0.000133229	up
Unigene0008154	0.1496	0.0831	0.2189	7.4984	11.0374	5.0478	5.70659	3.0713e-15	2.82734e-11	up
Unigene0010678	0	0	0.1347	0.8777	2.2507	3.7305	5.67016	8.69524e-07	0.000217442	up
Unigene0039275	0	0.0972	0	0.84	2.3705	1.5867	5.62509	0.000157357	0.00941127	up
Unigene0043714	0	0.0243	0	0.2212	0.7021	0.2529	5.59703	1.12815e-05	0.00144069	up
Unigene0068213	0.3097	0.7741	0.6178	18.5759	37.0874	26.4333	5.59236	4.36027e-13	2.56206e-09	up
Unigene0037950	0	0.1052	0	0.3028	4.6467	0.0953	5.58359	0.00119704	0.0333248	up
Unigene0059715	0	0	0.0914	1.2831	0.8729	2.2073	5.57708	8.48006e-06	0.00117041	up
Unigene0055719	0.0792	0	0	0.4432	1.2059	2.0928	5.56213	0.000126215	0.00807346	up
Unigene0045631	0	0.1331	0	0.7025	3.2441	2.2922	5.55069	1.68676e-06	0.000362451	up
Unigene0001313	0	0	0.0863	1.0812	1.3273	1.6339	5.54971	4.70575e-06	0.000763614	up
Unigene0059139	0	0.0972	0	0.84	2.2717	1.4104	5.53989	0.00021963	0.0117341	up
Unigene0015931	0	0	0.0895	0.8074	1.424	1.7792	5.48579	0.000267011	0.0133543	up
Unigene0011859	0	0.349	0.3342	5.4794	12.6604	12.4292	5.48362	1.18527e-10	1.73606e-07	up
Unigene0046613	0.0839	0.1747	0.0669	1.9116	8.1271	4.5135	5.48244	2.52215e-11	5.65672e-08	up
Unigene0059064	0.0977	0	0	1.5623	1.4879	1.2542	5.46131	5.25736e-05	0.00445404	up
Unigene0055683	0	0	0.1116	1.342	1.5386	2.0069	5.45269	0.000231429	0.0121505	up
Unigene0026080	0.0614	0.0512	0	0.9821	1.7668	1.9942	5.39655	2.99372e-06	0.000553762	up
Unigene0069158	0	0	0.0956	0.5748	1.3179	2.081	5.37733	0.000633463	0.0226238	up
Unigene0005489	0	0.0867	0	1.3318	0.8808	1.3364	5.35524	0.000275966	0.01365	up
Unigene0039276	0.108	0.045	0	1.727	2.5129	1.9573	5.34001	5.18942e-07	0.00014492	up
Unigene0011425	0.1296	0	0	1.4507	1.919	1.8105	5.32087	2.88556e-06	0.000542559	up
Unigene0051957	0	0.0509	0.0974	2.0017	1.1883	2.6744	5.30539	1.83158e-06	0.000384364	up
Unigene0013732	0	0.1126	0	0.9723	1.9435	1.5305	5.30333	1.83696e-05	0.00209457	up
Unigene0034549	0	1.0373	0.1242	8.3379	23.9682	13.5165	5.302	1.09583e-07	4.18339e-05	up
Unigene0019730	0	0.1664	0	3.1135	1.3517	2.0358	5.28793	2.39426e-05	0.00252329	up
Unigene0070183	0	0	0.0722	1.2296	0.4592	1.093	5.26788	0.000732078	0.0247602	up
Unigene0023624	0	0.0811	0	0.8566	1.2361	1.0297	5.26681	0.000406342	0.0175279	up
Unigene0031980	0	0.1098	0	1.7908	0.5574	1.7908	5.23633	0.00080623	0.0261943	up
Unigene0025070	0	0.1037	0	0.9956	1.3696	1.5044	5.2217	0.000482886	0.0192632	up
Unigene0024958	0	0.1017	0	1.6599	0.62	1.4755	5.20657	0.000735811	0.024828	up
Unigene0024369	0	0	0.0794	0.5571	1.0948	1.2778	5.20547	0.000824464	0.0265463	up
Unigene0010651	0.0297	0.1485	0	1.2349	3.8702	1.4579	5.20279	3.70773e-07	0.000110876	up
Unigene0040695	0.1129	0.2351	0.0901	3.8588	7.4268	4.8167	5.19986	4.22634e-12	1.4444e-08	up
Unigene0025028	0	0	0.0756	0.7578	1.5237	0.4294	5.16424	0.00140649	0.0364055	up
Unigene0028730	0.0943	0.5109	0	3.9231	8.9818	8.693	5.15734	4.78711e-08	2.23098e-05	up
Unigene0056974	0.0989	0	0	0.5536	1.5902	1.3445	5.14041	0.000407999	0.0175714	up
Unigene0000383	0	0.1994	0.1273	1.7222	3.1051	6.6871	5.13933	1.28881e-06	0.000300421	up
Unigene0034573	0	0.1474	0	1.8386	1.4967	1.8033	5.12357	3.20712e-05	0.00311513	up
Unigene0008417	0.0594	0.3464	0.0948	3.396	7.5646	6.4821	5.12282	1.94409e-10	2.55465e-07	up
Unigene0008081	0.0576	0.096	0	0.1382	2.2916	2.9155	5.12102	0.000128536	0.00817097	up
Unigene0003717	0.3427	0.2499	0	3.2547	8.6651	8.6395	5.11659	1.15275e-08	7.32148e-06	up
Unigene0066493	0.2003	0	0.3196	2.5627	8.1359	7.3368	5.11645	2.87801e-07	9.05943e-05	up
Unigene0038171	0	0.0733	0.0702	0.9142	2.2326	1.7933	5.10542	4.61637e-05	0.00406025	up
Unigene0042866	0.1666	0	0	0.5331	2.8205	2.2656	5.0759	7.7971e-05	0.00578695	up
Unigene0034693	0.0675	0.0563	0	0.7562	1.9435	1.3774	5.04146	2.93663e-05	0.00291914	up
Unigene0020803	0	0.1367	0	0.5248	1.2496	2.7261	5.041	0.000242184	0.0125137	up
Unigene0042148	0.0509	0.5515	0.0813	5.0082	8.7469	8.5564	5.02828	2.52458e-09	2.05896e-06	up
Unigene0006111	0	0.1643	0	1.971	2.1693	1.1914	5.02019	7.4041e-05	0.00561132	up
Unigene0056163	0	0.1067	0	1.0237	0.65	1.7403	4.99983	0.00149709	0.0376344	up
Unigene0036607	0.1212	0	0	1.6472	1.6406	0.5491	4.98448	0.000787626	0.0258236	up
Unigene0046049	0.1126	0.0938	0	3.0608	0.8574	2.5508	4.97003	6.64664e-05	0.0051964	up
Unigene0056433	0	0	0.2559	3.9106	0.8819	3.2091	4.96664	4.29506e-05	0.00388045	up
Unigene0005209	1.8022	10.1705	5.0009	121.006	227.611	181.02	4.96364	4.64077e-13	2.56206e-09	up
Unigene0046827	0	0.0894	0	0.5146	0.9984	1.2151	4.93148	0.0015813	0.0389356	up
Unigene0058217	0.1749	0	0	2.8674	0.7401	1.6513	4.91013	9.82987e-05	0.00673177	up
Unigene0062279	0	0.1589	0	2.8208	0.7261	1.2241	4.9081	0.000308058	0.0146699	up
Unigene0047514	0	0	0.0997	1.3493	0.7404	0.8968	4.90472	0.000173194	0.0100001	up
Unigene0030452	0.1735	0	0	0.763	1.7617	2.6205	4.89022	9.1071e-05	0.00642042	up
Unigene0059189	0	0	0.0847	1.0189	0.5391	0.8821	4.84843	0.00216861	0.0462943	up
Unigene0048873	0	0.1225	0	1.0578	1.2438	1.2211	4.84583	0.00153869	0.0383287	up
Unigene0045750	1.5395	2.764	0.2533	25.3743	67.9562	37.2005	4.84023	9.48983e-10	8.96165e-07	up
Unigene0067617	0	0	0.1427	0.9297	1.5135	1.5534	4.80772	0.000234825	0.0122633	up
Unigene0014315	0.0728	0.0607	0.0581	0.5823	2.2799	2.5022	4.80725	1.0645e-06	0.000256372	up
Unigene0057055	0	0.0935	0.0448	0.8522	1.6138	1.398	4.80422	2.25308e-05	0.00240272	up
Unigene0049987	0.138	0	0	1.5453	0.8176	1.4595	4.79174	0.00103693	0.030354	up
Unigene0040974	0	0.0945	0	1.088	0.6716	0.8563	4.79085	0.00200619	0.0443569	up
Unigene0005009	0.0977	0.1628	0	0.6249	3.0585	3.3937	4.7638	8.14928e-05	0.00594989	up
Unigene0005876	0.2139	0.0713	0.0341	1.3686	3.4396	3.7808	4.74951	3.2432e-07	0.000100764	up
Unigene0040230	0	0.1556	0	0.8213	1.5803	1.763	4.74226	0.000318033	0.0149406	up
Unigene0004564	0	0.1133	0.217	1.196	3.164	4.4155	4.73163	6.39842e-06	0.000947653	up
Unigene0036664	0.1031	0.1718	0.0206	1.8752	2.5513	3.3864	4.72463	1.46933e-08	9.09086e-06	up
Unigene0004686	0.089	0.1855	0.0355	1.7091	2.5999	3.8	4.70918	1.64092e-07	5.80143e-05	up
Unigene0046814	1.4227	1.4448	0.2838	15.3602	41.1636	25.8241	4.70771	6.04156e-11	1.08401e-07	up
Unigene0063909	0	0.1805	0	0.8665	1.8338	1.964	4.69159	0.000394155	0.0172176	up
Unigene0024640	0	0.3283	0	2.0706	3.8583	2.4657	4.67637	1.40579e-05	0.00171007	up
Unigene0046290	0.1235	0	0	1.6793	0.5227	0.933	4.66588	0.00236167	0.0485387	up
Unigene0055550	0.0631	0	0.1007	1.2113	1.175	1.7637	4.6631	2.64135e-05	0.00269658	up
Unigene0067714	0.128	0	0	0.6142	1.7333	0.8701	4.65177	0.00223207	0.0470037	up
Unigene0022479	0.1323	0	0	1.1636	1.3433	0.7992	4.64325	0.00153106	0.0382473	up
Unigene0053427	0	0	0.1912	1.8202	1.4193	1.5382	4.64316	0.000420718	0.0178457	up
Unigene0018713	0.2055	0	0	1.1502	2.1736	1.7071	4.61361	0.000164557	0.00969643	up
Unigene0011376	0	0.3906	0	2.678	2.3805	4.502	4.61332	2.13587e-05	0.00232897	up
Unigene0017505	0.0525	0.4809	0.0837	2.8115	4.6626	7.5696	4.60751	4.00286e-07	0.000116344	up
Unigene0070744	0	0.1648	0	1.1072	1.1717	1.718	4.60009	0.000420373	0.0178416	up
Unigene0017348	0.2259	0.6589	0.3606	10.2994	17.496	1.4506	4.55356	5.33944e-06	0.000838546	up
Unigene0037466	0	0.0651	0.1869	0.7494	2.7427	2.3889	4.54457	1.16247e-05	0.00146626	up
Unigene0052465	0.1368	0.342	0	2.7357	4.8636	3.5656	4.5434	1.30972e-06	0.000303389	up
Unigene0040687	0.3413	0.1896	0.1816	2.9118	6.7404	6.9611	4.5433	1.045e-06	0.000252524	up
Unigene0040323	0.4127	1.058	0.456	8.8347	19.961	16.0887	4.54201	4.59809e-12	1.50002e-08	up
Unigene0048817	0	2.4322	0.2912	16.5745	23.3452	22.4889	4.51826	7.64152e-06	0.00108386	up
Unigene0059711	0	0	0.1856	0.558	1.3777	2.2835	4.5067	0.00159384	0.039106	up
Unigene0066719	0.0699	0	0.1116	1.2861	1.4202	1.3731	4.49032	5.52255e-05	0.00458884	up
Unigene0015788	0.1405	0	0	0.8987	1.0699	1.167	4.4801	0.00229115	0.0477087	up
Unigene0063521	0.0833	0	0.0665	0.8662	0.7756	1.6992	4.47917	0.000404742	0.0174779	up
Unigene0069621	0	0.2229	0	3.1377	1.2829	0.5388	4.4757	0.000826009	0.0265629	up
Unigene0025268	0	0	0.1747	1.9259	1.297	0.6614	4.4747	0.00132219	0.0351849	up
Unigene0004179	0.125	0	0	0.9995	0.7404	1.0384	4.4742	0.00236012	0.0485347	up
Unigene0044811	0.4305	2.5421	0.2987	13.6964	36.5123	22.2382	4.46899	4.01344e-08	1.93318e-05	up
Unigene0064910	0.2204	0.6735	0.1173	3.2321	8.9552	10.157	4.46577	3.58818e-07	0.000108682	up
Unigene0061547	0	0.1658	0	0.3979	0.9264	2.3301	4.46212	0.00237127	0.0486802	up
Unigene0036666	2.5913	1.7736	0.1477	17.9856	49.2664	30.7578	4.4409	7.84455e-08	3.27328e-05	up
Unigene0014996	0	0.1729	0	0.8296	1.6681	1.2537	4.43942	0.000998006	0.0295491	up
Unigene0033069	0	0.1088	0.2085	1.0447	2.8745	2.9601	4.43834	0.000266527	0.0133393	up
Unigene0020790	0	0.2091	0	2.7093	0.9557	0.8529	4.43339	0.00175975	0.0412885	up
Unigene0004056	0.1274	0.5837	0	3.3612	4.6617	7.335	4.43278	4.01195e-06	0.000679099	up
Unigene0053096	0	0	0.3442	5.3809	0.803	1.1728	4.41774	0.000854163	0.0270113	up
Unigene0048753	2.4117	14.5907	3.7949	188.671	131.021	123.837	4.41456	3.07778e-10	3.44845e-07	up
Unigene0022039	0	0.1603	0	0.8462	1.5468	1.0172	4.41101	0.00107558	0.0310515	up
Unigene0020073	0	0	0.1656	0.4978	1.1413	1.8806	4.40968	0.00205599	0.0449132	up
Unigene0047139	0.2267	0.0945	0	0.816	4.8934	1.1132	4.40878	0.000473685	0.019088	up
Unigene0072049	0.1621	0.2894	0	2.2035	4.5462	2.8332	4.40766	7.08145e-07	0.000185487	up
Unigene0013182	0	0.3352	0	1.4801	2.6219	2.9781	4.40068	6.36055e-05	0.00501645	up
Unigene0049735	1.0046	1.1736	0.3773	10.9645	26.0236	16.5749	4.38956	3.17659e-12	1.27032e-08	up
Unigene0066765	0	0.2416	0	2.3185	1.8401	0.8759	4.38116	0.00140811	0.036407	up
Unigene0047140	0.7276	0	0	1.6003	10.3151	3.229	4.3795	0.000461051	0.0188067	up
Unigene0010236	0	0.0413	0.3166	4.2047	2.2668	0.8991	4.36415	7.74163e-05	0.00576366	up
Unigene0051330	1.28	0.5688	0.0454	2.3886	16.827	19.6801	4.35995	9.18936e-06	0.00125146	up
Unigene0062903	0	0.1712	0	1.0681	1.3476	1.0863	4.35442	0.000147305	0.0090052	up
Unigene0019251	0.0835	0	0.1333	1.6034	0.9191	1.8298	4.32734	0.000175061	0.0100836	up
Unigene0069597	0.1242	0	0.0991	2.3847	1.5247	0.5631	4.32403	0.000123581	0.00794748	up
Unigene0035977	0	0.1938	0	0.2325	1.8698	1.7127	4.29904	0.00127246	0.034424	up
Unigene0057823	0.1662	0	0	0.9969	1.8285	0.4394	4.296	0.00130761	0.0349197	up
Unigene0055518	0.0998	0.0832	0	0.2395	1.6897	1.6588	4.29326	0.00212798	0.0457261	up
Unigene0059983	0.1953	0	0	0.5468	2.3146	0.9591	4.29	0.00143298	0.0366388	up
Unigene0023300	0.129	0.1344	0	0.774	2.2388	2.0956	4.27754	1.10913e-05	0.00142147	up
Unigene0068205	0.3968	0.5196	0	4.3521	5.8528	7.45	4.26795	9.2489e-07	0.000228894	up
Unigene0058992	0	0.1757	0	0.9278	1.3388	1.1152	4.26661	0.00161901	0.0393887	up
Unigene0052660	0	0.2116	0	1.0155	1.5045	1.5345	4.26011	0.0016794	0.0402957	up
Unigene0032312	0.1607	0.3013	0.0641	3.1493	3.6047	3.3082	4.25746	1.01074e-07	3.98576e-05	up
Unigene0042521	0.0864	0.36	0	2.2231	5.278	1.0226	4.25507	4.91904e-05	0.0042359	up
Unigene0065990	0.1058	0	0.0844	1.1001	1.1642	1.3587	4.2516	0.000659569	0.0231818	up
Unigene0017847	0.1037	0.0864	0	1.0785	1.7559	0.7836	4.25036	0.000819469	0.0264742	up
Unigene0053127	0.1793	0.1494	0	0.502	1.1384	4.6058	4.24814	0.000583619	0.0215068	up
Unigene0028731	0.0501	0.2507	0	1.0026	2.9709	1.7424	4.2481	5.17441e-05	0.00440531	up
Unigene0062218	0	0.2077	0	1.595	1.3362	1.0043	4.24397	0.000578802	0.0214687	up
Unigene0000619	0.0894	0.149	0.0714	1.9308	1.2865	2.6341	4.23937	5.09361e-05	0.00436239	up
Unigene0036213	0.2969	1.1308	0.7953	8.9711	18.341	14.5753	4.23594	5.63126e-11	1.0363e-07	up
Unigene0068450	0.118	0	0.0942	1.1325	0.8988	1.961	4.23372	0.000926237	0.0282756	up
Unigene0006531	0.1062	0.1769	0	0.4245	3.0549	1.7642	4.21117	0.00100136	0.0295994	up
Unigene0042636	0.1116	0.6973	0.2226	5.0417	7.9558	6.047	4.20656	1.67524e-08	9.79014e-06	up
Unigene0000852	0.2654	0.0885	0	1.1038	2.9651	2.4458	4.20229	3.30147e-05	0.00318569	up
Unigene0024820	0.1797	0.1996	0	2.9698	1.8248	2.1715	4.19894	1.46187e-05	0.00176038	up
Unigene0053708	0	0.2472	0	1.4236	1.7576	1.3445	4.19439	0.00183476	0.0423682	up
Unigene0014378	0	0.0207	0	0.1194	0.1263	0.1315	4.18763	0.0019906	0.0441624	up
Unigene0035804	0.1666	0.1388	0.1995	1.6658	1.9744	5.538	4.18414	1.64086e-05	0.00193374	up
Unigene0016138	0.0499	0.0832	0.1593	0.7983	2.8302	1.6588	4.17652	2.35792e-05	0.00249232	up
Unigene0001417	0.1907	0	0.0761	1.6772	1.7749	1.3681	4.17526	0.000178036	0.0101895	up
Unigene0035203	0	0	0.745	7.8934	2.4834	3.0223	4.16875	0.00035815	0.0161866	up
Unigene0018438	0	0.2413	0.0462	1.0655	1.7159	2.3627	4.16128	9.73761e-05	0.00668773	up
Unigene0007597	0	0.6298	0	1.3738	5.5243	4.3595	4.15986	0.000423351	0.0178929	up
Unigene0059563	0	0.1608	0.077	0.8488	2.2864	1.0932	4.15229	0.000805125	0.0261762	up
Unigene0025376	0.1749	0	0.1396	1.8184	2.4423	1.3211	4.1496	0.000100741	0.0068338	up
Unigene0005790	1.3595	1.0538	0.1514	8.2938	19.2126	17.8873	4.14563	3.2767e-08	1.69186e-05	up
Unigene0060166	0	0.4023	0	0.6757	1.4301	5.0142	4.14553	0.00221702	0.0468594	up
Unigene0052421	1.0158	0.9169	0.1351	9.1393	13.2536	13.9387	4.13506	7.49878e-08	3.1473e-05	up
Unigene0033060	0	0.1336	0.1279	1.154	1.9674	1.4532	4.12876	0.00019298	0.0108149	up
Unigene0056849	0.1924	0	0	1.0001	1.384	0.9446	4.11278	0.00121318	0.033566	up
Unigene0070621	0	0.1784	0.0854	1.4556	1.4497	1.6578	4.1125	4.40722e-05	0.00395878	up
Unigene0037440	0	0.2839	0.4985	1.862	6.3439	5.2758	4.10695	1.87584e-05	0.00212349	up
Unigene0025267	0	0.211	0	1.0803	1.7148	0.829	4.10231	0.00129646	0.034745	up
Unigene0015656	0.0838	0.0698	0.1337	1.6746	1.3468	1.8979	4.09782	8.8851e-05	0.00630746	up
Unigene0024953	0.1277	0.0532	0	0.5619	1.4595	1.0614	4.09098	0.000411674	0.0176393	up
Unigene0003119	0.0497	0.5588	0.0991	0.1192	7.778	4.1275	4.08692	0.000600955	0.0218937	up
Unigene0024800	0.1098	0	0.0877	0.8784	1.3944	1.0786	4.08484	0.0012931	0.0347255	up
Unigene0035453	0	0	0.1773	0.5925	1.1285	1.287	4.08454	0.000463949	0.0188655	up
Unigene0017351	0.0989	0.1648	0	1.6608	1.8412	0.971	4.08427	0.000452432	0.0185761	up
Unigene0001043	0.0818	0.1363	0	1.8321	0.6924	1.1741	4.08392	0.0005856	0.021542	up
Unigene0023549	0.077	0.1284	0.0615	0.6162	1.6954	2.2115	4.08294	0.000234945	0.0122633	up
Unigene0038173	0.2694	0.5986	0	1.9749	6.4219	6.308	4.08245	2.11921e-05	0.00231501	up
Unigene0068027	0	0	0.3423	1.9441	1.9362	1.8901	4.07534	0.000315427	0.014874	up
Unigene0071410	0.0675	0	0.1078	0.8642	1.2004	0.8673	4.06394	0.000475715	0.0191165	up
Unigene0016210	0.248	0	0.1979	2.6775	3.3582	1.4049	4.06063	0.000194888	0.0108765	up
Unigene0004008	0.0657	0.5744	0.0524	3.2292	2.2781	6.0005	4.05465	1.08395e-05	0.00139668	up
Unigene0065008	0	0.1871	0	1.4969	0.7603	0.8482	4.0529	0.00146365	0.0370796	up
Unigene0021089	0	0.0692	0.1326	0.9304	0.9846	1.3809	4.02967	0.000787348	0.0258236	up
Unigene0026786	0.0357	0.1787	0.0571	1.601	1.7245	1.0801	4.02031	9.25977e-06	0.00125628	up
Unigene0050554	9.1415	4.5583	0.3446	36.7853	90.4044	99.1163	4.01021	3.97495e-06	0.000674426	up
Unigene0000289	0.112	0.0466	0.0894	1.9253	1.0898	0.9726	4.00714	6.21429e-05	0.00495142	up
Unigene0022043	0	0.3909	0.0624	1.2506	2.7792	3.2481	4.00498	0.000196895	0.010929	up
Unigene0051826	0	0.2985	0	0.3438	2.1226	2.2732	3.98896	0.00227437	0.0475576	up
Unigene0055925	0	0.2466	0	0.8285	1.503	1.5649	3.9819	0.00103899	0.0303988	up
Unigene0041363	1.7333	8.8923	4.2087	48.4373	103.941	81.4886	3.97868	1.45121e-09	1.28585e-06	up
Unigene0030032	0.1392	0.116	0	0.7794	1.5318	1.6826	3.96806	0.00228995	0.0477087	up
Unigene0054778	0.8465	4.7358	0.6755	20.503	43.1383	34.1617	3.96615	2.52309e-07	8.15686e-05	up
Unigene0002994	0	0.1313	0.1886	0.378	2.5332	2.0824	3.96439	0.000964088	0.0289523	up
Unigene0034394	0.5788	0.2597	0.2132	4.7534	6.82	4.8089	3.96134	1.98945e-09	1.65419e-06	up
Unigene0055170	0	0.1088	0.1042	0.6268	1.0503	1.6281	3.95581	0.000583767	0.0215068	up
Unigene0046187	1.8332	1.6079	0.0385	11.3046	23.15	19.4951	3.95462	5.63296e-06	0.000869414	up
Unigene0033058	0.3549	0.0329	0.0629	1.8922	1.8022	3.2764	3.95108	2.09756e-05	0.00230893	up
Unigene0006556	0.1047	0.2835	0.1462	2.1976	3.5215	2.4906	3.94134	1.14911e-07	4.31448e-05	up
Unigene0006734	0.3162	0.2634	0.0505	5.1583	2.1942	2.2926	3.93614	1.2763e-05	0.00159305	up
Unigene0049857	0	0.5062	0	1.9435	3.5992	2.1797	3.93127	0.00124544	0.0341294	up
Unigene0053423	0	0.6069	0.1937	8.6889	1.0274	2.4756	3.9287	0.000392492	0.017193	up
Unigene0049435	0.1568	0.3265	0	1.4417	3.7811	2.1313	3.92756	0.000111672	0.0073707	up
Unigene0029763	1.8109	0.4734	0.3967	0.3408	32.9958	7.3487	3.92366	0.000489336	0.0194354	up
Unigene0062499	0.228	0	0.0455	1.6864	1.1576	1.2914	3.91841	0.000259531	0.0131173	up
Unigene0040653	0.7133	1.0303	0.0759	4.9633	12.4165	10.0758	3.91549	7.68022e-07	0.000197227	up
Unigene0026614	0	0.2229	0	0.7131	1.4338	1.2123	3.91365	0.00247365	0.0497456	up
Unigene0030062	0	0.282	0	0.7037	0.9165	2.5562	3.88849	0.00195698	0.0438266	up
Unigene0030989	0	0.0656	0.7543	7.5594	2.5999	1.9634	3.88612	0.000567566	0.0212754	up
Unigene0059521	0	0.0528	0.3034	0.2027	2.0913	2.9672	3.88463	0.00233855	0.0483274	up
Unigene0010235	0	0	0.616	5.7487	1.6332	1.6033	3.86655	0.00153611	0.03832	up
Unigene0062738	0.091	0.1516	0	1.6731	0.6928	1.1679	3.86457	0.00121129	0.0335396	up
Unigene0037676	3.3188	7.4991	2.9756	41.8121	88.1141	69.3508	3.85271	4.67095e-11	9.06037e-08	up
Unigene0062239	0	0.1824	0.0873	0.7879	1.019	2.067	3.84436	0.00222028	0.0469089	up
Unigene0037468	0.2292	0.0955	0.1829	1.0081	3.5885	2.6834	3.84217	0.000258666	0.0130923	up
Unigene0042291	0.14	1.0498	0.6703	4.5344	13.2106	8.8824	3.83946	5.31215e-07	0.000147202	up
Unigene0003597	0.8757	2.0066	0.5241	9.1043	21.2145	18.4376	3.83927	2.65973e-07	8.56005e-05	up
Unigene0007868	0.6279	0.2325	0	1.9528	5.7274	4.5846	3.83337	9.40491e-05	0.00651535	up
Unigene0002770	0.1174	0.2933	0	1.5016	2.5326	1.8171	3.8326	8.85509e-05	0.00629237	up
Unigene0060139	0	0.1879	0.135	0.8568	0.6681	3.0663	3.82971	0.000634957	0.0226424	up
Unigene0043715	0.2225	0.8664	0.2283	3.9582	7.3322	7.4082	3.82738	7.91212e-09	5.30704e-06	up
Unigene0034899	11.5323	11.1144	2.7549	98.4538	178.289	82.604	3.82239	2.00522e-09	1.65419e-06	up
Unigene0039943	0.1357	0.113	0	0.4882	1.4925	1.537	3.82215	0.000192389	0.0107997	up
Unigene0069222	0	0.6111	0	3.0163	3.0146	2.6114	3.82193	0.000698447	0.0240766	up
Unigene0035731	0	0.1037	0.1987	0.9956	1.5803	1.6925	3.81917	0.00198052	0.0440717	up
Unigene0009267	0.1456	0.2427	0	0.8152	2.4647	2.1997	3.81883	0.00188196	0.0429283	up
Unigene0052420	0.1804	0.7514	0	2.5964	5.4952	5.0406	3.81694	0.000104301	0.00700906	up
Unigene0058955	0.2651	0	0.2115	4.24	1.4583	1.0011	3.81318	0.000394663	0.0172293	up
Unigene0058403	0	0	0.2963	1.6331	1.2569	1.262	3.80868	0.00201663	0.0444632	up
Unigene0000567	0	0.5862	0	3.5162	2.307	2.3247	3.79696	0.000816723	0.0264037	up
Unigene0004452	0.2836	0.9635	0.2873	3.4635	8.7705	9.0306	3.79271	2.67174e-08	1.475e-05	up
Unigene0044247	0.1056	0.2201	0.0843	0.7181	2.7268	2.2341	3.79194	6.53709e-05	0.0051275	up
Unigene0053559	0.1628	0.1356	0.065	0.5859	2.411	2.0288	3.78969	0.000388212	0.017041	up
Unigene0027686	0	0.4276	0	1.0553	1.3029	3.544	3.78692	0.00180911	0.0419641	up
Unigene0055184	0	0.4232	0	1.0832	2.4358	2.3018	3.78181	0.0014199	0.0365123	up
Unigene0064648	0	0.2256	0.162	2.3005	1.4607	1.5593	3.77892	3.69147e-05	0.00348143	up
Unigene0022478	0.1312	0.1639	0	1.154	1.1101	1.7834	3.77776	0.000262381	0.0132148	up
Unigene0048901	0.2152	0.6276	0.4293	6.7986	4.3713	6.2584	3.77615	3.36074e-06	0.000594804	up
Unigene0040798	0.1764	0.1469	0	1.6455	1.0945	1.6873	3.77548	0.000232303	0.0121545	up
Unigene0038675	0.0283	0.6483	0.1919	1.8441	5.2079	4.8296	3.77406	1.68267e-05	0.00197006	up
Unigene0032697	0.081	0.1349	0	0.7772	0.8909	1.2845	3.77355	0.0013819	0.0361175	up
Unigene0037952	0.3811	2.5402	1.4141	10.8649	25.1078	23.2575	3.7721	6.53787e-08	2.8379e-05	up
Unigene0035650	0.3968	0.8927	0.3166	3.5542	9.4029	8.8715	3.76459	1.93475e-07	6.62372e-05	up
Unigene0017169	0.1001	0.0834	0.0799	1.922	0.9322	0.6807	3.74634	0.00183598	0.0423827	up
Unigene0046815	5.4068	38.1491	19.3812	181.127	354.602	304.654	3.73906	3.41159e-08	1.73652e-05	up
Unigene0016634	0.3591	0.1795	0.6877	3.3313	7.5977	5.3704	3.73243	4.08501e-06	0.000688218	up
Unigene0039695	0.5271	0.7564	0.5842	2.6933	11.6483	10.4623	3.73123	8.87622e-08	3.62157e-05	up
Unigene0063490	0.1053	0.0877	0.168	1.8525	1.693	1.2327	3.7264	3.43799e-05	0.00328118	up
Unigene0015007	0	0.314	0.0463	1.136	1.9873	1.6204	3.71874	0.000207925	0.0113223	up
Unigene0023141	1.2796	2.0914	0.8836	10.3123	26.7613	18.3267	3.7028	1.05372e-09	9.82151e-07	up
Unigene0033243	0.4643	0.7737	0.0926	1.6708	6.7778	8.8544	3.70087	4.22848e-05	0.00383664	up
Unigene0042937	0	0.4289	0	1.7153	1.5248	2.3329	3.69974	0.00147391	0.0372342	up
Unigene0057887	0.0794	0.1984	0.0633	0.5712	2.8209	1.019	3.69287	0.0011061	0.0316401	up
Unigene0046813	0.9466	15.1707	7.1008	64.6032	128.265	106.896	3.69051	2.36274e-06	0.000468436	up
Unigene0033942	0.2009	0	0.0802	1.2051	1.0202	1.3658	3.67527	0.00153356	0.0382962	up
Unigene0001353	0.1624	0	0.1296	1.1687	1.3742	1.1651	3.6666	0.000724782	0.0245715	up
Unigene0046291	0.1955	1.0319	0.4161	3.8445	9.7091	7.2744	3.66368	1.5833e-07	5.65339e-05	up
Unigene0026641	0.0736	1.5324	1.3796	7.266	16.6859	13.7528	3.65865	8.502e-06	0.00117119	up
Unigene0035789	0.401	1.0858	0.1067	3.6076	8.6535	7.7989	3.65405	5.13245e-06	0.000816273	up
Unigene0066750	0.1749	0.2429	0.0698	2.5643	1.8009	1.7614	3.65132	2.78953e-06	0.000529642	up
Unigene0050438	0	0.4212	0.0403	1.334	2.032	2.4244	3.64926	0.000416731	0.0177395	up
Unigene0019292	0	0.529	0	1.8617	2.0149	2.7574	3.64854	0.0013461	0.0355183	up
Unigene0056540	0.1639	0.2732	0	1.3983	2.4045	1.6507	3.64115	0.00020261	0.0111254	up
Unigene0066017	0.125	0	0.1496	0.8995	1.3221	1.18	3.63081	0.000565143	0.0212025	up
Unigene0036199	0	0.1071	0.7179	5.8585	1.7947	2.5239	3.62479	0.000546024	0.0207895	up
Unigene0058033	0	0.1775	0.17	1.5334	0.9015	1.8506	3.62438	0.00191207	0.0432086	up
Unigene0033085	1.6603	0.9223	0.2524	6.3863	16.5609	12.0035	3.6239	7.33745e-07	0.0001908	up
Unigene0041152	0.1132	0.1886	0.0903	0.7693	2.3465	1.7096	3.62135	0.000136824	0.00855608	up
Unigene0071541	0.1488	0.0827	0.0396	0.6743	1.3433	1.3112	3.61811	0.000373818	0.0166714	up
Unigene0036616	0.0774	0.0323	0.3089	2.3839	1.1467	1.6082	3.61779	9.66484e-05	0.00665049	up
Unigene0040667	0.2809	0.3121	0.0747	1.0484	3.5662	3.5718	3.61596	4.00896e-05	0.00370296	up
Unigene0034550	10.9918	20.209	7.9953	104.154	202.822	172.248	3.61192	8.60206e-11	1.43574e-07	up
Unigene0012828	0	0.1926	0.2459	1.1708	3.3908	0.7566	3.60029	0.00136714	0.0358887	up
Unigene0036543	0	0.1399	0.201	1.3432	1.1372	1.6492	3.59858	0.000992143	0.0293997	up
Unigene0039744	0.2602	0	0.2076	0.8324	2.8627	1.9653	3.59694	0.0019559	0.0438261	up
Unigene0064639	0	0.1356	0.1299	0.716	0.8955	1.5985	3.59579	0.00236816	0.0486442	up
Unigene0037272	0.2024	0.1687	0.1346	1.6727	2.7408	1.6562	3.58527	3.95877e-06	0.000674426	up
Unigene0013237	0.1219	0.1015	0.1945	1.9978	1.1344	1.8409	3.57292	9.37787e-05	0.00651535	up
Unigene0002966	0.9238	0.4003	0.2064	2.719	8.2567	7.1178	3.5634	3.1352e-06	0.000568138	up
Unigene0051331	2.5708	1.7695	0.4014	7.1066	22.9397	26.0034	3.56323	2.56605e-06	0.000503184	up
Unigene0062325	0.2197	0.0915	0	1.142	1.1155	1.4104	3.55904	0.00217463	0.0463399	up
Unigene0028933	0.335	0	0.4679	5.8276	1.3468	2.2775	3.55731	0.000720681	0.0245119	up
Unigene0000232	4.7208	27.2368	8.054	102.798	206.244	161.372	3.55544	1.26331e-07	4.62592e-05	up
Unigene0048503	0.1884	0.157	0.1503	2.4106	1.993	1.423	3.55512	0.000222314	0.0118452	up
Unigene0026744	0.2838	0.1577	0.151	2.3457	2.2822	2.3227	3.55225	7.72248e-06	0.00109103	up
Unigene0027443	0	0.274	0.1908	2.2471	1.4672	1.7159	3.54632	8.95715e-05	0.0063438	up
Unigene0010781	0.2269	0.397	0.1267	2.0324	3.0533	3.6677	3.54373	6.89116e-07	0.00018183	up
Unigene0024382	0.193	0.3216	0.154	1.8519	2.2048	3.7168	3.53935	0.000124453	0.00798215	up
Unigene0000650	0	0.5976	0.2108	1.2075	3.5778	4.5616	3.53135	0.000383031	0.0168962	up
Unigene0026549	0.5013	1.0443	0.3455	4.4651	9.7009	7.608	3.52531	6.1708e-08	2.71705e-05	up
Unigene0023173	4.3844	24.9157	2.5891	82.5429	138.335	144.591	3.51861	5.00746e-06	0.000802468	up
Unigene0069278	0.0675	0.2251	0.0539	1.0263	1.2004	1.7345	3.51501	0.000538065	0.0205854	up
Unigene0058689	0.1408	0	0.1123	1.351	0.4765	1.0633	3.51369	0.00229879	0.047819	up
Unigene0006521	0.1087	0.7247	0.0868	1.565	4.5082	4.4341	3.5133	0.000502477	0.0197172	up
Unigene0025463	0.0769	0.2562	0	1.1065	1.301	1.3933	3.51228	0.00129518	0.0347411	up
Unigene0062698	0.1076	0.1345	0.0429	0.9466	0.6375	1.6662	3.51154	0.000468953	0.0189937	up
Unigene0051035	5.335	0.8891	0.5588	8.2935	39.7338	28.9892	3.50519	3.80798e-05	0.00355858	up
Unigene0041628	0.2619	1.3404	0.1194	3.6053	9.1821	6.7396	3.50356	1.84795e-05	0.00210186	up
Unigene0039784	0.168	0.1399	0	1.2761	1.7057	0.5075	3.5024	0.00241842	0.0491422	up
Unigene0050099	0	0.4172	0.0799	1.5216	2.034	2.0422	3.49325	0.00142874	0.0365875	up
Unigene0002892	0	0.8187	0.1206	2.5991	6.9083	1.0276	3.48746	0.00218986	0.0465649	up
Unigene0010877	0.086	0	0.4805	3.4744	1.4561	1.397	3.48149	0.000849458	0.0269419	up
Unigene0070971	0.199	0	0.1588	1.5121	1.3475	1.1275	3.47811	0.00165051	0.0398577	up
Unigene0024695	0.3045	0	0.0607	0.9132	1.3529	1.7825	3.47066	0.00213183	0.0457539	up
Unigene0008584	0.5039	0.6717	0.3217	3.0626	6.823	6.6984	3.46936	1.89091e-05	0.00213381	up
Unigene0070503	0.1323	0.0735	0.3166	2.3271	1.4552	1.9981	3.46794	4.45978e-05	0.00397613	up
Unigene0012647	0.188	0.4428	0.1174	2.0268	2.6291	3.6185	3.46716	1.15422e-07	4.31448e-05	up
Unigene0048903	0.2946	0.3682	0	1.826	2.3063	3.171	3.4619	0.000333343	0.0153951	up
Unigene0016632	0.0792	0.1319	0.1263	1.9626	0.737	1.0165	3.46126	0.00127108	0.034424	up
Unigene0004266	5.0784	2.1741	0.8532	15.6964	39.9966	33.293	3.45657	3.59337e-07	0.000108682	up
Unigene0027469	0.1963	0.7635	0.2089	2.1461	5.013	5.6606	3.45539	9.24046e-06	0.00125604	up
Unigene0036919	0.0641	0.2137	0.2047	0.8206	2.388	2.0829	3.45508	0.000312906	0.0147745	up
Unigene0017916	0.2742	0.2285	0	3.2899	0.4062	1.8125	3.45392	0.0024869	0.0498692	up
Unigene0059485	0.0389	0.4865	0.0777	1.8056	1.9931	2.8079	3.45344	7.161e-05	0.00549674	up
Unigene0034166	0.3806	0.666	0.3037	3.3788	5.3151	6.0949	3.45315	6.01998e-07	0.000163039	up
Unigene0025775	0.5726	1.002	0.3046	3.8928	9.1113	7.5118	3.44855	1.0163e-07	3.98578e-05	up
Unigene0015897	0.3166	0.1319	0.0632	1.2029	1.8089	2.5711	3.44764	0.000499901	0.0196915	up
Unigene0041136	5.1855	23.0594	24.929	105.364	231.153	243.035	3.44615	9.84249e-08	3.92442e-05	up
Unigene0005424	0.3877	0.7269	0.1547	2.5387	5.1885	6.0949	3.44487	2.01202e-06	0.000410625	up
Unigene0021942	0.0576	0.552	0	2.3498	2.2185	2.067	3.44423	0.000733322	0.0247841	up
Unigene0061310	0.1306	0.2903	0	0.8358	1.4372	2.3023	3.44232	0.000684662	0.0237039	up
Unigene0041108	1.3825	9.1047	3.1611	33.3816	56.9485	57.9146	3.44119	3.95277e-07	0.000115792	up
Unigene0037923	2.4579	24.9032	6.7814	80.6362	148.335	141.848	3.44108	2.89486e-06	0.000542559	up
Unigene0047794	6.2936	28.3612	2.7674	87.8714	181.815	135.977	3.43832	4.95455e-06	0.000797283	up
Unigene0047620	2.1587	7.7021	4.8807	31.1639	62.4675	66.1409	3.43806	1.4824e-08	9.09329e-06	up
Unigene0054965	0.1607	0.2232	0.0641	1.7782	2.0404	1.0319	3.43656	1.81118e-05	0.00207124	up
Unigene0046084	0.3214	3.5908	1.0958	11.3208	22.971	19.9166	3.43621	4.92591e-06	0.000794455	up
Unigene0034402	0.0673	0.1121	0.2683	1.6136	1.7076	1.524	3.43595	0.000277821	0.0137134	up
Unigene0059595	0	0.1336	0.1919	0.9616	1.289	1.2715	3.43571	0.00187211	0.0428194	up
Unigene0017741	3.2194	17.7317	2.9545	54.7392	109.723	93.5497	3.43202	1.72782e-06	0.00036688	up
Unigene0008178	5.6671	29.6034	10.2467	91.2337	217.234	182.772	3.43194	2.00689e-07	6.73058e-05	up
Unigene0051429	0.7878	1.3959	0.8573	8.8334	9.4374	14.4959	3.42961	4.66134e-11	9.06037e-08	up
Unigene0042522	0.1194	0.6269	0.324	3.2092	7.2268	1.0825	3.42787	1.67849e-05	0.00196839	up
Unigene0067217	0	0.2476	0.1976	1.4654	1.6765	1.6459	3.42684	0.000296098	0.01432	up
Unigene0022655	1.6364	9.9483	1.9988	30.1813	64.528	51.0066	3.42323	1.48175e-06	0.000334419	up
Unigene0015008	0.2052	0.1465	0.0468	0.6564	1.5876	2.0147	3.41776	8.48107e-05	0.00611262	up
Unigene0062197	0.1688	0.2814	0.0674	1.0128	2.215	2.2957	3.41567	0.000517985	0.0200848	up
Unigene0055272	0.4149	0.1729	0	1.4104	2.8973	1.9589	3.41429	0.00149075	0.0375275	up
Unigene0015150	0.444	0.1233	0.059	0.8877	2.6302	3.1299	3.40795	0.000653862	0.0230376	up
Unigene0047003	1.1201	2.1847	1.4626	12.1947	25.7452	12.575	3.40543	4.62714e-09	3.42361e-06	up
Unigene0061954	0.6118	0.9062	0.3255	4.8926	7.9964	6.6232	3.40386	2.60715e-06	0.000506106	up
Unigene0000552	0.6104	0.3846	0.4871	3.3937	6.3761	5.9156	3.40371	5.28746e-09	3.83052e-06	up
Unigene0057857	0	0.3398	0.217	0.7067	1.7546	3.4143	3.39951	0.000746804	0.0249971	up
Unigene0025341	0.2495	0.8314	0.3981	2.3941	6.7032	6.5007	3.39867	2.10472e-05	0.00231181	up
Unigene0031155	0.1277	0.4258	0	1.4813	1.8919	2.4604	3.39773	0.000628761	0.0225194	up
Unigene0026547	1.1054	8.0892	4.0269	32.3632	54.1377	52.7279	3.3965	4.81784e-07	0.000135599	up
Unigene0008232	7.4723	15.0274	6.5009	77.9584	139.796	87.5059	3.39588	1.4452e-09	1.28585e-06	up
Unigene0004947	0	1.1455	0.0499	2.5487	5.3414	4.6727	3.39359	0.00222272	0.0469328	up
Unigene0019184	0.1087	0.2717	0	0.9129	1.8401	1.2317	3.38888	0.000840118	0.0268204	up
Unigene0041595	0.2842	0.5565	0.1361	2.5342	4.1729	3.5204	3.38825	4.03645e-07	0.000116344	up
Unigene0022623	0.0802	0.334	0	1.4745	1.2212	1.6348	3.38613	0.0016327	0.0396007	up
Unigene0006188	2.3879	1.5781	0.2136	16.7765	15.9241	10.9934	3.386	3.14602e-06	0.000568138	up
Unigene0061892	0.2513	0	0.1337	0.9378	1.6304	1.4551	3.38545	0.00245404	0.0495293	up
Unigene0036791	2.7016	8.2164	2.393	29.4057	57.2749	51.7906	3.3789	5.39771e-08	2.46748e-05	up
Unigene0039347	0.2398	0.0799	0.3444	3.183	1.6233	2.1007	3.37859	6.1885e-05	0.00495142	up
Unigene0048907	0.481	0.3607	0.1151	2.6541	3.175	4.1052	3.37613	1.50405e-05	0.00179909	up
Unigene0017655	0.0726	0.0303	0.029	0.4212	0.6455	0.3018	3.37508	0.000410549	0.0176016	up
Unigene0013553	0	0.2139	0.2048	1.5739	1.0138	1.745	3.37128	0.00167402	0.0402358	up
Unigene0056956	0.1368	0.228	0	1.8055	0.8106	1.1368	3.36283	0.00142781	0.0365875	up
Unigene0052523	0.3469	0.1445	0.1384	1.5954	2.1287	2.7515	3.36205	0.000338364	0.0155363	up
Unigene0025266	0.0977	0.2442	0.1559	0.5859	2.6452	1.8813	3.36036	0.000311399	0.0147375	up
Unigene0015364	0.1044	0.435	0	1.5449	2.2977	1.6958	3.36004	0.000661599	0.0231865	up
Unigene0015671	0.2832	0.1416	0.0904	1.5853	1.39	2.31	3.35878	1.86629e-05	0.00211601	up
Unigene0053059	0.1174	0.1467	0.2809	1.0324	3.1285	1.4182	3.3557	0.000271567	0.0135103	up
Unigene0026406	0.2499	0.125	0.2394	0.8796	2.4962	2.9075	3.35451	0.000130395	0.00825991	up
Unigene0013752	0.4571	0.0423	0.0811	0.5687	2.0633	3.2993	3.35298	0.00139879	0.0363077	up
Unigene0034861	0.2446	0.2038	0	1.33	1.3246	1.9211	3.35113	0.000472743	0.0190783	up
Unigene0014168	0.1939	0.3634	0.1934	1.531	2.8301	3.2763	3.34677	2.63299e-06	0.000506622	up
Unigene0043728	0.3341	1.4478	0.32	3.6344	8.1445	9.5909	3.34581	9.42488e-06	0.00127387	up
Unigene0007700	0.2009	0.3348	0.1603	3.0529	1.9554	2.0487	3.3419	0.000283654	0.0138962	up
Unigene0012613	0.1105	0.307	0.3528	4.3319	1.6528	1.823	3.34141	5.37748e-06	0.000840832	up
Unigene0017033	0.1587	0.1323	0.1267	0.3808	1.8134	2.0381	3.3409	0.0018708	0.0428194	up
Unigene0010969	0.1593	0.0996	0.0636	0.86	0.7416	1.6546	3.33582	0.000359678	0.0162346	up
Unigene0034481	0.1289	0.4295	0.0686	1.0993	2.6902	2.4983	3.32602	0.000217405	0.0116525	up
Unigene0064427	0.0878	0.2195	0.2102	0.9481	1.6721	2.5536	3.32159	0.00011908	0.00772028	up
Unigene0028457	0.0796	0.2652	0.2539	1.8452	1.616	2.5239	3.32147	0.000320078	0.0150046	up
Unigene0029437	0.0861	0.8254	0.275	4.3058	2.6975	4.8475	3.3202	5.24897e-05	0.00445294	up
Unigene0045280	4.5732	4.8193	1.5027	26.3552	43.1441	38.7088	3.31204	2.51633e-07	8.15686e-05	up
Unigene0006929	0.0664	0.4427	0	0.8498	2.1357	2.0566	3.308	0.00237795	0.0487476	up
Unigene0049858	0.9367	2.5149	0.5814	12.7351	16.7359	10.4556	3.30742	6.7367e-06	0.000982709	up
Unigene0027139	0.23	0	0.3671	1.3797	2.1415	2.3456	3.29653	0.0018732	0.0428194	up
Unigene0056316	0	1.0201	0.628	4.6158	10.5094	1.0568	3.29551	0.00243317	0.0492467	up
Unigene0047403	0.3118	0.9354	0.0498	3.3417	3.5891	5.7941	3.2944	0.000212842	0.0114941	up
Unigene0002512	0.1396	0.1551	0.1857	1.3401	1.9302	1.4414	3.29394	7.0979e-05	0.00547171	up
Unigene0038035	0.1474	0.4094	0	2.8688	1.6635	0.9279	3.29372	0.00136548	0.0358581	up
Unigene0069308	0.091	0.3789	0	1.4548	1.8475	1.3053	3.29359	0.00243281	0.0492467	up
Unigene0049373	3.3392	3.8534	1.0703	19.1855	32.5058	29.2749	3.2926	2.78428e-08	1.5254e-05	up
Unigene0045017	2.0452	3.0242	1.724	13.4768	30.3273	22.7587	3.29251	4.69139e-09	3.43573e-06	up
Unigene0015365	0	0.4944	0.0395	1.0677	1.5692	2.577	3.28772	0.00229713	0.0478009	up
Unigene0003550	0.2967	0.6798	0.0592	2.3726	3.7034	4.0335	3.28703	0.000230636	0.0121281	up
Unigene0043045	0.3009	1.3789	0.4202	4.2713	8.2124	8.0113	3.28681	6.46718e-06	0.00095504	up
Unigene0039472	0.1178	1.0796	1.1279	3.6267	9.5699	9.4752	3.28541	5.44667e-05	0.00455603	up
Unigene0049403	0.7341	0.7865	0.5301	4.6412	8.1957	7.1298	3.28341	1.34317e-07	4.86318e-05	up
Unigene0022042	0	0.8015	0.0853	1.5813	3.7992	3.1889	3.27251	0.00202322	0.0445257	up
Unigene0018055	0.0707	0.5007	0.1693	1.8376	2.5729	2.7235	3.26775	6.61957e-05	0.00518088	up
Unigene0030384	0.143	0.1787	0.1141	1.4866	1.0891	1.6201	3.26721	0.000537183	0.0205729	up
Unigene0037941	1.8471	4.1233	1.5286	13.3136	31.3623	27.5082	3.26691	5.64845e-08	2.54962e-05	up
Unigene0006857	1.1174	4.2438	2.4261	13.292	32.6626	28.3698	3.25464	8.88109e-08	3.62157e-05	up
Unigene0044761	0.7466	4.4928	1.6108	11.9416	32.2245	20.8442	3.24645	3.07163e-06	0.000562375	up
Unigene0035755	0.2251	0.4377	0.539	3.661	5.0174	2.7208	3.24566	3.83597e-05	0.00358007	up
Unigene0007776	0.2847	0.1779	0.2556	1.2807	2.4095	3.1181	3.24484	2.17357e-05	0.00234935	up
Unigene0048900	0.9944	2.6769	0.2442	12.1735	10.552	14.3285	3.24236	3.10127e-05	0.0030574	up
Unigene0010660	0.31	0.2385	0.0761	1.6022	2.846	1.4592	3.24152	2.15433e-05	0.00233933	up
Unigene0058276	0.3263	0.233	0.0744	2.0876	1.9725	1.9013	3.23378	7.9468e-05	0.00584568	up
Unigene0036044	0.2916	0.2617	0.1432	0.8971	2.753	2.8976	3.23279	1.74629e-05	0.00203791	up
Unigene0032393	3.5203	6.2206	1.5499	17.2078	45.2295	43.6677	3.23227	4.35603e-07	0.000125053	up
Unigene0003351	0.1317	0.1646	0.2102	1.1061	2.0065	1.6416	3.23057	0.000366859	0.0164559	up
Unigene0006667	0	0.4398	0.1805	1.7488	2.393	1.6801	3.23045	0.000574224	0.0213756	up
Unigene0010339	0.6214	1.9417	0.3306	4.6384	10.4306	12.0863	3.23025	2.41179e-05	0.00253432	up
Unigene0039543	0.1611	0.2014	0.1286	1.0309	1.5683	2.0082	3.22986	0.000706051	0.0242555	up
Unigene0026784	0.0772	0.2574	0.0616	0.9883	1.3073	1.4001	3.22155	0.00177212	0.0414283	up
Unigene0004551	0.9436	0.6265	0.8707	10.518	7.7614	4.4658	3.22014	1.58043e-08	9.45231e-06	up
Unigene0003967	0.7981	0.6274	0.5408	4.8775	6.5762	6.8474	3.21838	3.76316e-09	2.96794e-06	up
Unigene0043309	0.7985	1.2669	0.4626	5.0652	9.8871	8.5515	3.21683	3.48814e-08	1.76298e-05	up
Unigene0020965	0.0942	0.6279	0.0752	2.486	2.6307	2.2768	3.21306	0.000957886	0.0288008	up
Unigene0034453	2.5366	6.1039	0.7946	18.5995	33.306	35.3479	3.2091	3.29115e-06	0.000586986	up
Unigene0036597	0.2906	0.9684	0	5.1704	2.2132	4.2248	3.20482	0.00121646	0.0335751	up
Unigene0043722	0.4414	1.4252	0.1174	3.2653	7.5802	7.3904	3.2003	5.12547e-05	0.00437402	up
Unigene0030784	0.6249	2.0827	0.3657	5.4972	9.8718	12.6808	3.19013	1.52479e-05	0.00181861	up
Unigene0067057	0.1835	0.3058	0.1098	1.9811	1.5917	1.871	3.18375	0.000109982	0.00728846	up
Unigene0030167	0.23	0.2683	0.0367	0.7359	2.1025	2.0155	3.18153	0.000638084	0.0226925	up
Unigene0055031	0.2716	0.3112	0.8128	2.6609	4.9996	5.0006	3.18145	8.43516e-06	0.00116646	up
Unigene0036828	0.4216	2.1582	0.2884	5.0581	12.3367	8.6218	3.18121	4.36835e-05	0.00393371	up
Unigene0005103	1.3114	3.8888	0.749	9.871	24.1561	19.9081	3.18046	2.02012e-06	0.00041072	up
Unigene0005208	2.4683	20.9257	15.895	88.8087	149.752	117.262	3.17896	3.0993e-06	0.000565996	up
Unigene0048908	2.2962	3.4746	1.4659	17.2479	19.1852	29.0556	3.17784	7.88216e-09	5.30704e-06	up
Unigene0045004	1.2341	2.3708	0.2188	10.747	11.4599	12.2734	3.17273	1.32599e-05	0.00163798	up
Unigene0056829	0.2138	0.2672	0.0853	1.3677	2.3519	1.3724	3.16859	0.0016347	0.0396226	up
Unigene0004983	0.4713	0.4713	0.0188	2.8836	3.251	2.4921	3.1656	0.000160413	0.00953838	up
Unigene0045368	2.7695	8.8759	1.3601	26.2389	46.3384	43.368	3.15625	7.4151e-06	0.00105802	up
Unigene0002779	0.303	0.3788	0.3023	1.6965	2.7571	4.2918	3.15165	0.000186191	0.0105359	up
Unigene0001725	0.5537	0.1538	0.1718	1.9926	3.2801	2.5325	3.15001	3.24457e-05	0.0031468	up
Unigene0034840	0.0195	0.9667	0.1867	2.4639	3.5232	4.3742	3.14305	0.000620255	0.0223325	up
Unigene0053890	17.7594	15.3807	9.4853	107.252	123.972	144.232	3.13886	9.06869e-10	8.67813e-07	up
Unigene0019391	9.5938	43.4933	6.0631	100.123	234.396	185.835	3.13704	1.08245e-05	0.00139668	up
Unigene0033472	0.4267	1.0727	0.2348	3.2065	6.1451	5.879	3.13463	1.10806e-06	0.000264057	up
Unigene0035282	0.2393	0.3987	0.1273	2.4877	2.025	2.1989	3.13256	4.58636e-05	0.00404613	up
Unigene0025725	0.1684	0.2806	0.0672	2.2895	1.2827	0.954	3.1323	0.0018231	0.0421696	up
Unigene0021761	1.3624	3.4283	1.2611	11.6366	19.6475	21.7544	3.1316	1.60832e-07	5.7143e-05	up
Unigene0044481	0.9851	3.9494	2.9222	13.0104	29.6867	26.0422	3.12914	2.94547e-07	9.23128e-05	up
Unigene0058046	0.1265	0.3688	0.0505	0.9103	1.7125	2.1493	3.12818	0.00118157	0.0330482	up
Unigene0007143	0.076	0.3484	0.3944	1.5202	2.767	2.8715	3.12811	9.75367e-05	0.00669236	up
Unigene0068329	0.4275	0.2672	0.0853	2.3934	2.7137	1.6954	3.12452	0.00124719	0.0341514	up
Unigene0034165	0.1978	0.0824	0.6313	4.508	1.3391	2.0915	3.12257	0.00182439	0.0421696	up
Unigene0011666	0	0.3527	0.193	1.3056	1.3817	2.0552	3.11947	0.00161513	0.0393342	up
Unigene0045707	1.9155	0.6207	1.4194	5.8604	23.3143	5.2019	3.11946	9.16769e-06	0.00125088	up
Unigene0037270	0.1978	0.3296	0.5524	3.2426	2.176	3.9588	3.11842	0.000288227	0.0140847	up
Unigene0039461	0.2755	0.3367	0.1759	1.3516	2.4564	3.011	3.11311	5.48541e-06	0.000855843	up
Unigene0056792	0.1104	0.552	0.2203	1.8544	3.1304	2.6271	3.10826	0.000192459	0.0107997	up
Unigene0011374	0.079	0.2634	0.1261	1.6644	1.36	1.0148	3.10795	8.40476e-05	0.00608687	up
Unigene0006349	0.0794	1.8515	0.475	2.9195	12.123	5.6646	3.10548	0.000741895	0.0249505	up
Unigene0057189	0.4122	0.2576	0.2467	2.9673	1.5701	3.3475	3.10489	0.000652203	0.0229905	up
Unigene0012680	0.2287	1.1012	0.649	4.7563	8.5393	3.6666	3.09955	9.67341e-06	0.00129768	up
Unigene0003484	0.0889	0.4816	0	1.0311	1.7308	2.1156	3.09584	0.00246087	0.0495964	up
Unigene0045390	0.4921	1.6245	0.5287	4.7232	9.3557	8.4642	3.09118	1.49479e-06	0.000336305	up
Unigene0020685	0.0396	0.066	0.0316	0.4596	0.4696	0.2395	3.09055	0.00107998	0.0311454	up
Unigene0009193	5.3068	4.1785	0.3497	19.0792	32.8814	31.7366	3.08918	5.45726e-05	0.00455758	up
Unigene0032421	1.5834	7.1878	2.4765	18.2349	41.5418	35.8796	3.08823	1.42457e-06	0.000324576	up
Unigene0001053	0	0.2896	0.2311	0.9265	1.1766	2.319	3.08621	0.00235912	0.048528	up
Unigene0000656	0.323	0.5872	0.0469	2.325	3.1314	2.6173	3.07649	0.000139478	0.00865199	up
Unigene0042858	0.6518	2.7373	4.2132	13.9811	24.7582	25.3754	3.07615	2.75053e-06	0.000523622	up
Unigene0045558	1.6518	2.9322	1.7766	11.9468	20.5442	21.0749	3.07408	3.96796e-08	1.92689e-05	up
Unigene0030740	0.3272	0.4545	0.0435	2.7481	1.431	2.7603	3.072	0.000500395	0.0197001	up
Unigene0009554	0.2058	0.3858	0	1.7281	1.3498	1.8653	3.06275	0.00151292	0.0379392	up
Unigene0010438	0.1901	0.4118	0	2.0674	2.1235	0.8327	3.06113	0.00188653	0.0429965	up
Unigene0047348	15.8416	35.9545	15.8356	165.482	197.722	200.678	3.05962	4.12715e-09	3.21962e-06	up
Unigene0017515	0.3802	0.2376	0.3792	2.4323	3.8609	2.0101	3.05802	0.000474168	0.019088	up
Unigene0052905	0.1483	0.4326	0.148	1.6015	2.7305	1.7367	3.05759	0.000137756	0.00858972	up
Unigene0046778	6.9237	24.1033	5.1505	58.9392	142.273	99.1882	3.05372	3.86379e-06	0.000661825	up
Unigene0036665	0.3132	0.4101	0.2678	2.2006	3.105	2.9232	3.05358	2.25671e-06	0.000452413	up
Unigene0071377	0.106	0.6182	0.296	1.7377	3.005	3.7227	3.05273	0.000240427	0.0124678	up
Unigene0049989	0.2493	0.3462	0.1326	3.1235	1.4066	1.5064	3.0515	0.00123799	0.0339681	up
Unigene0002656	3.8792	7.8049	2.3406	21.3387	50.0875	44.7382	3.05013	6.71103e-07	0.000177731	up
Unigene0016717	0.4947	0.9775	0.3384	2.5771	6.0405	6.3733	3.04955	1.75681e-06	0.000370841	up
Unigene0037922	3.4397	15.8045	5.0976	40.4778	83.0916	77.6473	3.04724	3.57191e-06	0.000622223	up
Unigene0032033	20.8083	17.9135	5.9304	158.902	125.657	84.2006	3.04588	1.98865e-07	6.70071e-05	up
Unigene0046325	4.5448	14.2085	0.3374	39.9261	71.353	46.3575	3.04566	0.000564765	0.0211994	up
Unigene0021423	0.26	1.2167	0.0638	2.7515	4.9093	5.0311	3.04244	0.000373987	0.0166714	up
Unigene0006620	0.1764	0.1469	0.2815	1.0578	2.9851	0.9324	3.04025	0.0024596	0.0495859	up
Unigene0015207	0.2939	0.2449	0.2345	0.8059	2.8429	2.6958	3.03643	0.000210745	0.0114325	up
Unigene0042180	0.1543	0.343	0.0821	1.0698	1.3498	2.3316	3.03566	0.000850264	0.0269419	up
Unigene0036190	0.5558	0.1029	0.2464	2.3708	2.6134	2.4257	3.0333	0.000337764	0.0155269	up
Unigene0035454	0.238	0.0744	0.095	0.809	1.3345	1.191	3.03295	0.000270585	0.013486	up
Unigene0013487	0.1037	0.1729	0.2483	1.0371	1.4925	1.763	3.03174	0.000500728	0.0197025	up
Unigene0035439	0.4131	0.4016	0	1.9825	2.3893	2.2365	3.01994	0.00127461	0.034451	up
Unigene0030008	0.1817	0.2019	0.145	1.5504	1.9995	0.7321	3.01804	0.00131217	0.0349913	up
Unigene0018391	0.1418	0.5121	0.1132	1.5501	1.9604	2.6959	3.01627	0.000100011	0.00680743	up
Unigene0018861	0.1773	0.4802	0	1.241	1.801	2.2772	3.01615	0.00201658	0.0444632	up
Unigene0007074	1.1913	1.3235	0.1981	3.7912	9.6623	8.436	3.01233	3.30687e-05	0.00318569	up
Unigene0046368	0.1214	0.5057	0.1937	1.2135	3.7499	1.6504	3.01038	0.000868752	0.0272988	up
Unigene0044344	0.3122	1.6138	0.4297	3.9302	7.4986	7.5332	3.00888	6.40395e-06	0.000947653	up
Unigene0002663	0.9069	0.7557	1.8496	6.9311	12.9637	8.373	3.00871	2.54366e-05	0.00262674	up
Unigene0069563	0.9954	0.553	0.353	4.069	6.5526	4.6785	3.00841	0.000164453	0.00969643	up
Unigene0049802	0.3258	0.7554	0.373	4.656	3.7523	3.29	3.008	8.57401e-08	3.53653e-05	up
Unigene0047437	0.3746	0.333	0.4783	2.9362	2.5576	3.9993	3.0009	3.18645e-06	0.000573161	up
Unigene0014781	0.1242	0.1553	0.347	1.2917	1.8401	1.8769	2.99905	0.000628433	0.0225194	up
Unigene0010638	0.2463	0.3078	0.1965	1.5756	2.2093	2.2136	2.99849	1.49003e-05	0.00178829	up
Unigene0064499	0.4612	0	0.368	2.4588	2.5369	1.6256	2.99732	0.0019839	0.0440717	up
Unigene0047758	0.2817	0.9391	0.4497	3.455	4.4908	5.3913	2.99709	3.14727e-05	0.00307738	up
Unigene0025442	1.1382	0.5269	0.1009	2.2252	6.315	5.5405	2.99516	0.000569763	0.0212811	up
Unigene0018218	0.197	0.4376	0.1834	1.9165	2.556	2.0332	2.99153	5.2244e-05	0.00443734	up
Unigene0026038	0.2588	0.4073	0.0918	2.1616	1.7034	2.1284	2.9833	8.81605e-05	0.00628329	up
Unigene0038458	0.0437	0.6185	0.0697	1.3968	2.1433	2.2427	2.98205	0.00184581	0.042555	up
Unigene0028201	0.1854	0.2472	0.0296	1.3643	0.9415	1.3445	2.98143	0.000780105	0.0256826	up
Unigene0048909	0.5162	1.0752	0	4.0248	3.0579	5.4582	2.97827	0.00237382	0.0487046	up
Unigene0061633	0.1846	0.0384	0.3314	1.4391	1.4838	1.4289	2.97261	0.000715171	0.0244302	up
Unigene0035978	0.1658	0.9668	0.0661	1.2926	5.2959	2.8172	2.97206	0.00196957	0.043995	up
Unigene0040853	0.2589	1.0246	0.439	6.1333	3.9983	3.3729	2.97086	2.63799e-05	0.00269658	up
Unigene0004213	0.3383	0.4698	0.18	1.3528	3.1971	3.1941	2.97035	4.80528e-05	0.00416515	up
Unigene0044620	0.6164	0.6163	0.3935	1.7746	5.8426	5.1213	2.96962	0.000124402	0.00798215	up
Unigene0030436	0.1167	1.0211	0.1397	2.24	3.3335	4.4076	2.96588	0.000555336	0.020955	up
Unigene0008060	2.6957	6.348	2.0421	21.9656	27.659	36.9026	2.96444	2.99991e-07	9.36103e-05	up
Unigene0041576	0	0.3684	0.7762	2.2629	2.9934	3.6734	2.96377	0.00226276	0.0474016	up
Unigene0049398	0.3895	0.3245	0.0389	2.1805	1.8542	1.8387	2.96367	0.000641055	0.0227203	up
Unigene0031134	7.1633	15.8583	3.4746	39.26	93.7319	73.6819	2.9635	3.61144e-06	0.000624561	up
Unigene0039397	0.4639	4.9473	2.2703	10.4615	23.6332	25.6939	2.96041	5.26888e-05	0.00445404	up
Unigene0012459	0.1213	0.1768	0.0242	1.1275	0.3592	1.0191	2.9588	0.000747851	0.0250108	up
Unigene0010030	0.67	1.4423	0.2673	5.2694	6.2615	6.9169	2.95466	1.45868e-05	0.00175948	up
Unigene0000758	0.9302	1.0496	0.6959	6.3855	8.0039	6.309	2.95153	5.93493e-08	2.62932e-05	up
Unigene0044879	0.5181	0.2943	0.0376	2.0905	2.1724	2.3123	2.9515	0.000250486	0.0127728	up
Unigene0052316	0.5857	0.244	0.1869	1.7799	2.6271	3.4506	2.95034	0.000308237	0.0146699	up
Unigene0046063	0.3711	1.0693	0.3331	5.1318	3.8996	4.6483	2.94737	2.89455e-06	0.000542559	up
Unigene0016874	0.052	0.2602	0.1246	1.1237	1.101	1.1399	2.94539	0.00155926	0.0386203	up
Unigene0033176	0.1684	0.4911	0.2016	1.2795	2.8504	2.4804	2.94046	0.00111321	0.0318055	up
Unigene0044885	3.8841	2.1498	0.5798	11.4718	21.1975	17.9477	2.93609	7.16337e-06	0.00102823	up
Unigene0010748	1.2468	0.6209	0.2287	3.404	7.2531	5.38	2.93543	1.13439e-05	0.00144471	up
Unigene0003536	0.2341	0.504	0.0934	2.2001	2.3447	1.8127	2.93467	6.21408e-05	0.00495142	up
Unigene0038653	0.167	1.0088	0.2776	2.1035	4.2047	4.8038	2.93461	5.86368e-05	0.00477112	up
Unigene0021610	0.3294	0.6274	0.0751	1.1668	3.8038	2.9149	2.9339	0.000347396	0.0158403	up
Unigene0041732	0.1293	0.6464	0.1032	2.7921	1.8603	2.051	2.93112	0.00111741	0.0318493	up
Unigene0035145	0.5652	0.9418	0	4.4446	3.986	3.0594	2.93063	0.00175463	0.0412689	up
Unigene0025711	0.7382	0.9842	0.3535	4.7232	6.7476	4.3493	2.92995	6.31214e-05	0.00499373	up
Unigene0018968	0.7274	1.7456	0.3251	5.3985	8.2	7.692	2.92769	1.758e-05	0.00204492	up
Unigene0039277	0.0493	0.8208	0.1965	1.5362	2.9804	3.5529	2.91946	0.000855135	0.0270128	up
Unigene0034724	0.3377	0.0938	0.1347	1.4854	1.8577	0.9353	2.91769	0.00136478	0.0358529	up
Unigene0039284	0.4348	1.6367	0.4667	9.3657	4.3147	5.4365	2.91297	1.05116e-05	0.00137167	up
Unigene0020745	0.3105	0.4718	0.3644	1.9866	2.9601	3.6835	2.91191	3.37473e-07	0.000103506	up
Unigene0014434	0.2364	0.7881	0.4717	2.3638	4.4025	4.465	2.90815	0.000133237	0.00841022	up
Unigene0018658	0.4776	0.4812	0.1773	3.1712	2.82	2.5168	2.90473	1.98625e-06	0.000409634	up
Unigene0010025	0.2765	0.2765	3.5746	18.6422	6.4823	5.7645	2.90372	0.00159388	0.039106	up
Unigene0042616	0.9057	3.0739	1.2692	8.0737	17.4242	13.6655	2.89945	2.62857e-06	0.000506622	up
Unigene0010252	0.2075	0.5186	0.0993	1.9911	1.7208	2.4447	2.89897	0.000382933	0.0168962	up
Unigene0029155	0.751	0.9386	0.461	2.3331	5.7447	7.9415	2.897	1.77421e-05	0.00205379	up
Unigene0018998	0.1436	0.3591	0.1146	1.321	2.1274	1.1392	2.8937	0.00189714	0.0430742	up
Unigene0045271	0.1522	0.3806	0.1215	1.5829	1.6106	1.6675	2.89323	0.00138272	0.0361258	up
Unigene0011173	0.2505	0.328	0.0857	0.9731	2.3322	1.6219	2.89108	0.000424212	0.0178929	up
Unigene0034432	0.125	1.0413	0.3989	2.6986	2.8558	6.0415	2.8892	0.00191656	0.0432824	up
Unigene0035749	0.2329	0.5268	0	2.1555	1.4925	1.9604	2.88409	0.00210944	0.0454365	up
Unigene0028831	1.5566	12.9961	2.4479	22.8483	47.8799	54.7209	2.88344	9.95042e-05	0.00680135	up
Unigene0052172	0.1739	0.2174	0.2776	1.6693	1.6193	1.6423	2.88199	0.00147915	0.0373375	up
Unigene0044016	0.2051	0.3759	0.4091	3.1324	2.3082	1.8432	2.87905	1.36246e-05	0.00166866	up
Unigene0008084	1.2715	3.8141	0.4588	7.7019	17.7793	15.2415	2.87673	4.83144e-05	0.00418122	up
Unigene0044595	9.4238	21.8664	9.2114	65.9197	122.23	108.783	2.87408	2.30456e-07	7.58706e-05	up
Unigene0004506	0.2764	0.5922	0.0315	1.3893	2.6732	2.5349	2.87374	0.00115498	0.0325836	up
Unigene0026426	0.112	0.2332	0.134	1.2089	0.9476	1.3532	2.87265	0.00138881	0.0361626	up
Unigene0061284	0.1671	0.8353	0.6	2.4051	5.5852	3.7228	2.86982	0.000548933	0.0208119	up
Unigene0003075	0	0.3208	0.4097	1.5396	1.919	1.8742	2.86794	0.00205199	0.0448764	up
Unigene0040624	1.8826	2.0839	0.7895	6.7259	14.3748	13.587	2.8666	8.00943e-07	0.000203122	up
Unigene0047208	0.3828	0.2977	0.1425	1.4898	2.7643	1.7347	2.8633	8.31897e-05	0.00603572	up
Unigene0008132	2.356	3.8741	2.3875	13.1812	25.7626	23.7488	2.86294	4.37649e-08	2.06668e-05	up
Unigene0040766	2.4257	12.3712	11.0803	41.5591	72.2253	74.3954	2.86236	4.61245e-06	0.000752353	up
Unigene0045367	5.2181	17.1201	5.1183	34.0812	85.2886	80.2248	2.86185	1.0198e-05	0.00134401	up
Unigene0054500	0.1224	0.7649	0.2605	1.4847	3.4531	3.3747	2.85641	0.000190981	0.0107419	up
Unigene0039711	1.9034	4.4242	1.8387	11.3772	25.0849	22.6583	2.8559	7.13612e-07	0.00018624	up
Unigene0046515	1.0106	0.8491	0.3863	3.4977	6.5115	6.2477	2.85562	6.35825e-07	0.00016964	up
Unigene0044273	0.2843	0.6316	0.3781	4.2817	2.2455	2.8272	2.85381	0.000110998	0.00733544	up
Unigene0015802	0.3038	0.2025	0.1454	1.4576	1.2083	2.0421	2.85283	0.000169837	0.00986977	up
Unigene0038454	0.1232	0.5516	0.2703	1.5513	2.5276	2.7442	2.85189	4.92231e-05	0.0042359	up
Unigene0016123	0.785	2.6982	1.3312	6.0034	14.5331	14.1936	2.85076	2.18886e-05	0.00235622	up
Unigene0033964	0.1812	0.7802	0.229	1.3889	4.141	3.057	2.85069	0.00010452	0.00701068	up
Unigene0063609	0.3106	0.2588	0.2974	1.8879	1.6824	2.6746	2.84891	0.000423823	0.0178929	up
Unigene0050451	0.2908	0.3634	0.1547	1.7054	2.2149	1.9035	2.84793	0.000290067	0.014131	up
Unigene0036858	0.4841	0.1153	0.1104	2.2677	1.6389	1.2015	2.8473	0.00220963	0.0468079	up
Unigene0007470	0.7653	2.015	0.4397	6.3406	8.8083	8.0232	2.84726	1.80456e-05	0.0020689	up
Unigene0051329	2.7745	1.9719	0.7163	3.1979	15.8845	20.1556	2.84457	0.000321641	0.0150599	up
Unigene0000311	0.7691	1.1943	0.7253	6.1231	6.8939	6.2848	2.84375	1.94231e-06	0.000402889	up
Unigene0038546	0.9102	1.5169	0.1816	2.0018	8.4255	8.2502	2.8399	0.000796959	0.0260226	up
Unigene0046812	14.2297	37.2936	32.1251	142.984	230.775	220.112	2.82774	2.29137e-07	7.57843e-05	up
Unigene0038211	0.2367	0.9468	0.0756	2.1014	3.3256	3.4866	2.82362	0.000660944	0.0231865	up
Unigene0022513	1.7574	3.7524	1.0518	12.6496	19.9864	13.6064	2.8171	4.02091e-05	0.0037045	up
Unigene0034482	0.0565	0.5648	0.2254	1.8069	2.1033	2.0479	2.81493	0.00139801	0.0363077	up
Unigene0019172	0.2145	0.5064	0.2853	2.3443	2.6623	2.0521	2.81049	0.00010318	0.00694023	up
Unigene0006514	0.3016	0.534	0.3008	1.8392	3.2226	2.9046	2.80946	8.24191e-05	0.0060053	up
Unigene0040678	0.2343	0.1627	0.2804	1.2491	1.7844	1.7105	2.80802	0.000294137	0.0142473	up
Unigene0035600	0.3102	0.0431	0.2063	0.951	1.4439	1.523	2.80761	0.00213805	0.0458266	up
Unigene0035736	0.2844	0.8085	0.247	4.0606	2.683	2.6346	2.80719	6.17261e-06	0.000928739	up
Unigene0056272	0.1895	0.3553	0.0756	1.4778	1.2029	1.6462	2.80206	0.00128429	0.0345866	up
Unigene0009730	0.3247	0.2706	0.5831	1.0389	3.9852	3.1888	2.80106	0.00137203	0.0359371	up
Unigene0004472	2.002	6.4375	2.7552	14.1004	32.2819	31.6373	2.80102	2.01393e-06	0.000410625	up
Unigene0002194	0.2273	0.6199	0.2639	3.223	2.2038	2.3103	2.7998	3.7515e-05	0.00351495	up
Unigene0037757	0.3272	1.2839	0.457	2.5736	6.6817	5.1291	2.79813	2.67194e-05	0.00272394	up
Unigene0039607	0.2079	0.8085	0.2212	1.3858	3.0502	4.1358	2.79205	0.00131984	0.0351353	up
Unigene0038745	0.3369	0.4338	0.5865	2.0942	3.3566	3.9441	2.79124	4.18393e-06	0.000701591	up
Unigene0039712	1.3226	2.963	1.5226	14.0288	12.8272	13.2005	2.78587	2.72585e-07	8.73368e-05	up
Unigene0043250	12.7847	7.7393	1.1336	33.6455	60.6669	54.6811	2.7823	0.000105292	0.00704927	up
Unigene0010285	0.257	0.6425	0.1367	1.3019	2.9005	2.9122	2.77948	0.000700754	0.024133	up
Unigene0043400	0.8043	1.445	0.4412	4.1005	6.392	7.9449	2.77669	3.56687e-06	0.000622223	up
Unigene0009028	0.5878	0.2449	0.2345	1.9197	2.2388	3.1451	2.77478	0.000323517	0.0151066	up
Unigene0037415	1.5447	12.0345	0.7088	19.1175	43.305	34.7406	2.7656	0.00112975	0.0320863	up
Unigene0033564	0.7699	0.5675	0.2127	2.2261	3.7592	4.5404	2.76348	8.71463e-05	0.00622639	up
Unigene0066243	0.5732	1.7912	0.2859	2.8654	5.3367	9.6883	2.75496	0.000899732	0.0277551	up
Unigene0001518	0.8139	3.2554	1.1691	5.2076	14.8104	15.3085	2.75355	7.22039e-05	0.0055305	up
Unigene0054545	0.0722	0.4514	0.1153	1.1553	1.3754	1.7731	2.75195	0.00142597	0.0365875	up
Unigene0004168	0.0652	0.5431	0.3641	2.2416	2.0411	2.2648	2.75132	0.00148135	0.0373436	up
Unigene0004824	6.2174	4.714	3.3282	25.2326	33.6635	36.7678	2.74604	5.92901e-08	2.62932e-05	up
Unigene0062046	0.6545	0.1818	0.1306	2.1374	2.0772	2.2659	2.74467	0.00107235	0.0310177	up
Unigene0005757	1.7352	19.221	7.5749	45.3865	74.4631	70.4665	2.73779	0.000143066	0.00882876	up
Unigene0009726	0.46	0.2556	0.2447	2.0849	2.4659	1.8533	2.73744	0.00106963	0.0309853	up
Unigene0031949	0.9516	2.5204	0.3797	5.5721	9.262	10.8077	2.73493	0.000118885	0.00771465	up
Unigene0048422	7.3323	7.1812	4.609	36.195	45.2149	45.6878	2.73259	2.84717e-08	1.54465e-05	up
Unigene0050887	2.09	2.322	1.2932	8.1394	15.3041	14.4595	2.73196	3.26955e-07	0.000101145	up
Unigene0011501	0.3831	0.5472	0.1747	1.8384	3.1034	2.3977	2.73164	0.000480692	0.0192348	up
Unigene0047978	1.0888	1.0554	0.8157	6.0691	7.9365	5.5726	2.72563	1.06008e-07	4.09044e-05	up
Unigene0067080	0.3616	0.7868	0.1764	1.7996	4.3359	2.6253	2.72529	0.000151435	0.00915627	up
Unigene0041525	9.6537	14.8584	10.4622	58.8318	51.4832	120.491	2.72231	3.90206e-07	0.000115247	up
Unigene0032811	0.1296	0.4678	0.2068	1.8652	1.9372	1.5006	2.72118	0.000641768	0.0227231	up
Unigene0036790	6.3055	15.0887	4.6018	37.8866	70.7898	62.6906	2.72073	2.69772e-06	0.000514934	up
Unigene0033566	0.55	0.5892	0.4703	1.7595	4.9209	3.9171	2.71904	0.000102989	0.00693388	up
Unigene0036930	0.1149	0.9193	0.2568	1.342	2.7624	4.3926	2.71846	0.000902421	0.0277969	up
Unigene0047911	0.5157	0.382	0.0914	1.833	2.7641	1.9043	2.71656	0.00127543	0.0344515	up
Unigene0065359	0.5642	0.5014	0.6303	1.3837	6.7482	3.0113	2.71604	0.000290472	0.0141337	up
Unigene0038742	0.4487	0.5021	0.1228	1.2509	3.266	2.5372	2.71601	0.000100067	0.00680743	up
Unigene0033822	0.4052	0.5628	0.1437	2.2326	2.3626	2.6868	2.71157	0.000423171	0.0178929	up
Unigene0029485	1.6732	3.6959	2.9853	11.349	22.0027	21.3421	2.71077	6.48917e-07	0.000172492	up
Unigene0007322	0.8059	1.3594	0.9411	7.1209	7.0699	6.1316	2.70976	5.64168e-07	0.000154588	up
Unigene0000435	0.3058	2.0505	0.337	8.1518	3.9189	5.5103	2.70657	0.000277324	0.0136983	up
Unigene0034842	0.2412	1.7332	0.9262	4.1106	6.6462	8.1632	2.70549	7.23776e-05	0.00553789	up
Unigene0069235	1.4227	3.334	0.4257	13.7246	9.2562	10.8132	2.70507	0.00033065	0.015319	up
Unigene0048622	0.278	0.6178	0.5177	0.9265	2.5101	5.7755	2.70426	0.00129583	0.0347411	up
Unigene0069497	0.3557	0.5927	0.3784	1.1615	4.7159	2.7537	2.70159	0.000247947	0.0127018	up
Unigene0071378	0.0789	0.46	0.3461	0.8515	2.4029	2.502	2.70142	0.00153859	0.0383287	up
Unigene0039021	0.9652	1.5787	0.7132	6.7184	6.5046	7.9384	2.69978	7.42996e-06	0.00105803	up
Unigene0001341	0.1639	0.4553	0.1744	1.3983	2.1733	1.5682	2.69523	0.00154772	0.0384572	up
Unigene0024025	5.6529	12.0684	3.2565	27.9284	54.6085	53.26	2.69452	6.26329e-06	0.000934546	up
Unigene0016669	0.4773	0.0994	0.2381	1.1453	2.323	1.8028	2.69359	0.00199252	0.0441641	up
Unigene0016531	0.2035	0.2261	0.2977	1.6003	1.4638	1.6395	2.69314	0.000272558	0.0135373	up
Unigene0067574	0.3482	0.4352	0.1389	1.9957	1.4243	2.5424	2.69259	0.00109806	0.0315231	up
Unigene0032570	0.1325	0.8835	0.2115	3.551	1.9069	2.4528	2.68808	0.00216711	0.046276	up
Unigene0051130	0.3368	1.029	0.9407	3.8608	9.5252	1.4628	2.68657	0.00050864	0.019883	up
Unigene0003951	0.9292	1.4794	0.8077	3.7026	7.8083	9.1747	2.68515	3.60923e-06	0.000624561	up
Unigene0049988	35.1672	33.1132	14.3491	126.352	241.827	162.918	2.68424	4.76602e-07	0.000135201	up
Unigene0052123	0.489	0.4074	0.1951	2.1835	2.4831	2.3392	2.68224	0.000230666	0.0121281	up
Unigene0006106	0.2975	0.6941	0.3561	2.3079	2.82	3.5056	2.67945	7.4419e-05	0.00563402	up
Unigene0030094	0.2081	0.8544	0.2965	3.0308	2.6035	3.0645	2.67827	6.17551e-05	0.00494661	up
Unigene0041565	0.5485	0.3999	0.3967	2.5223	3.1333	2.9518	2.67786	6.24035e-06	0.000933063	up
Unigene0039606	0.2061	2.3359	0.3619	4.5169	7.2572	6.7572	2.6739	0.00135122	0.0356142	up
Unigene0001654	0.2161	1.058	0.2587	0.8858	4.7329	4.1628	2.67389	0.00153927	0.0383287	up
Unigene0028088	0.3563	0.4949	0.3791	1.5911	3.242	3.0056	2.6716	9.13413e-05	0.00642524	up
Unigene0038981	2.0164	9.801	4.3966	21.1192	40.0526	42.0927	2.67103	1.40928e-05	0.00171141	up
Unigene0021448	0.1551	0.6031	0.1857	1.3541	2.5815	2.0697	2.66953	0.000155641	0.00933193	up
Unigene0027154	9.4213	25.7364	5.7241	52.6577	120.056	87.377	2.66949	2.16531e-05	0.00234396	up
Unigene0068548	0.548	1.0763	0.4061	2.0347	5.0352	5.8243	2.66689	0.00019795	0.0109706	up
Unigene0038838	7.4819	5.9134	1.5805	26.311	33.9892	34.7398	2.6659	1.42456e-05	0.00172488	up
Unigene0040447	17.6175	22.4385	16.402	69.4758	154.141	134.392	2.66474	1.2714e-07	4.63191e-05	up
Unigene0045914	0.7064	0.515	0.1409	2.3304	2.5035	3.8017	2.66425	0.000548845	0.0208119	up
Unigene0033620	0.2247	0.6554	0.0897	1.7074	2.1397	2.2916	2.66217	0.00224388	0.0471616	up
Unigene0010059	9.8586	41.1899	8.0904	170.104	96.6328	107.422	2.66147	4.91724e-05	0.0042359	up
Unigene0069591	0.1461	1.0653	0.4372	2.1911	5.0083	3.2006	2.65727	0.000721772	0.0245157	up
Unigene0026938	0.3752	0.469	0.0599	1.8305	1.6831	2.1823	2.65537	0.00115877	0.0326265	up
Unigene0044891	0.0983	0.5732	0.1569	1.5327	1.4556	2.227	2.65435	0.00220595	0.0467576	up
Unigene0045763	0.8134	1.6267	1.2495	5.4482	9.6723	8.0948	2.65354	2.01126e-06	0.000410625	up
Unigene0010677	1.6105	1.3419	0.9131	5.796	11.2268	7.2988	2.65351	1.38077e-05	0.00168533	up
Unigene0046777	8.0402	28.2772	8.041	58.4987	123.413	97.1705	2.65341	1.71712e-05	0.00200713	up
Unigene0050408	0.1736	1.4949	0.4618	6.7112	3.6	3.0818	2.65235	0.000661504	0.0231865	up
Unigene0017061	0.2683	0.3725	0.2497	1.2872	2.0433	2.2626	2.65096	0.000547986	0.0208119	up
Unigene0001902	0.4177	0.3232	0.2143	1.4316	2.3735	2.1859	2.64892	0.000171341	0.00993028	up
Unigene0034240	0.809	0.4759	0.1139	1.7128	3.0209	4.0261	2.64671	0.00118234	0.0330568	up
Unigene0036249	0.1739	0.4493	0.1388	1.5302	1.7959	1.4452	2.64652	0.000194078	0.0108396	up
Unigene0021449	0.0563	0.0586	0.1123	0.3939	0.5597	0.4676	2.64507	0.000859627	0.0270832	up
Unigene0047091	4.3928	8.8893	2.7126	20.5355	37.5762	41.7526	2.64238	9.07391e-06	0.00124045	up
Unigene0048954	0.6493	2.5248	0.6333	9.1739	5.312	9.2639	2.64104	0.000361991	0.0163089	up
Unigene0011900	0.1947	0.51	0.1998	2.314	2.0014	1.3239	2.64032	0.000348029	0.0158591	up
Unigene0045557	1.3838	1.9916	1.3385	7.2103	9.4402	12.7329	2.64001	5.88925e-06	0.000893598	up
Unigene0045613	1.0129	1.3112	0.5629	4.1227	6.9498	6.9131	2.6392	5.0277e-06	0.000803648	up
Unigene0032222	6.1549	12.2041	2.8651	25.7517	56.9143	49.3748	2.63721	2.15778e-05	0.00233933	up
Unigene0040677	1.8929	4.5499	1.9754	22.301	14.6035	15.2332	2.63074	1.78155e-05	0.00205897	up
Unigene0040607	0.6949	3.6056	0.6049	7.2498	12.1808	10.9428	2.63037	0.000141326	0.0087289	up
Unigene0034785	1.5986	2.5689	1.549	8.9037	12.0798	14.4035	2.63002	9.36586e-06	0.00126828	up
Unigene0010370	0.2886	0.4008	0.1535	2.9234	1.2212	1.0535	2.62455	0.00199528	0.0441979	up
Unigene0069585	0.4939	0.7317	0.3504	2.1507	3.6787	3.8801	2.62313	6.92169e-06	0.00100155	up
Unigene0010994	0.2831	0.6029	0.1004	2.5915	1.4644	2.0199	2.62283	0.000948054	0.0286371	up
Unigene0041635	0.5833	1.1767	0.7594	2.6025	7.275	5.6349	2.62227	5.95533e-05	0.00482408	up
Unigene0013033	1.1617	1.0693	0.9486	3.2517	8.5512	7.7543	2.62078	3.27753e-06	0.000586604	up
Unigene0047181	3.5811	1.0285	0.4717	8.9119	15.8309	6.4998	2.62024	0.000243936	0.012568	up
Unigene0049710	0.826	1.8682	0.6121	8.2201	5.6827	6.4177	2.61965	5.78239e-06	0.000886247	up
Unigene0011685	0.4195	0.9904	0.6138	2.3486	5.1482	4.8588	2.6101	0.000530346	0.0203327	up
Unigene0008775	0.7968	1.3544	0.3052	1.6313	6.6894	6.6683	2.60929	0.000569906	0.0212811	up
Unigene0040576	21.5765	19.3861	14.8529	104.836	117.954	116.973	2.60579	2.90715e-08	1.54553e-05	up
Unigene0018906	0.8012	3.5451	0.8157	6.7389	13.2106	11.3312	2.59927	0.000126049	0.00807005	up
Unigene0038598	2.0035	1.4086	1.5489	6.0255	13.7595	10.2624	2.59854	2.28282e-06	0.000456374	up
Unigene0003853	0.1238	0.5929	0.1975	1.5094	2.1733	1.8462	2.59641	0.000859442	0.0270832	up
Unigene0051755	0.1945	0.2972	0.3105	1.4003	1.7837	1.6654	2.59577	0.000371754	0.0166198	up
Unigene0010183	0.3476	1.988	2.0426	5.598	9.2538	11.6126	2.59564	9.38894e-05	0.00651535	up
Unigene0030259	10.3259	28.4731	5.2013	50.5968	115.041	99.9643	2.59368	4.70953e-05	0.00410749	up
Unigene0044434	0.4946	0.6993	0.5023	2.0616	2.8413	5.2867	2.58672	2.45192e-05	0.00256149	up
Unigene0070182	0.7187	0.6488	0.5735	2.2513	4.1059	5.2931	2.5855	0.000324582	0.0151427	up
Unigene0046838	0.6503	1.0545	0.519	5.6931	3.4214	4.2219	2.58427	1.0617e-05	0.00137827	up
Unigene0045876	14.8217	19.9171	15.6144	56.8809	130.034	114.911	2.58356	2.83164e-07	8.99234e-05	up
Unigene0011094	1.8804	0.9327	0.3216	3.1152	8.2605	7.3724	2.58035	0.000557202	0.0209942	up
Unigene0041080	0.3799	0.5276	0.2021	0.6752	2.6437	3.316	2.58004	0.00227281	0.0475576	up
Unigene0014140	1.4969	3.8886	1.3351	9.7534	16.7304	13.6347	2.57761	2.82845e-05	0.00283316	up
Unigene0038170	0.2827	0.8918	0.9024	3.2945	4.751	4.347	2.57696	4.70173e-05	0.00410749	up
Unigene0034369	0.157	0.9318	0.2818	1.6004	3.1548	3.4084	2.5744	0.000629541	0.0225347	up
Unigene0043827	0.2963	0.1411	0.304	1.5909	0.9672	1.8542	2.57321	0.00138959	0.0361626	up
Unigene0012144	0.2544	1.0173	0.5886	1.7087	3.2505	6.1096	2.57289	0.000457185	0.0187177	up
Unigene0032569	10.4464	44.6766	27.7493	106.233	200.49	185.605	2.57066	1.08613e-05	0.00139698	up
Unigene0020652	0.4287	0.958	0.2333	1.9948	3.3149	4.3126	2.57039	0.000195812	0.0108992	up
Unigene0011188	1.4213	5.6256	0.4096	7.6098	20.3162	16.3426	2.56971	0.00125409	0.0342299	up
Unigene0027576	0.7398	1.9635	0.7216	3.7144	7.5947	9.0134	2.56894	2.71049e-05	0.00274375	up
Unigene0038270	0.4099	0.6489	0.2371	1.852	2.5235	3.3125	2.56865	2.52982e-05	0.00261999	up
Unigene0048173	2.715	9.4037	4.0755	34.9409	27.9088	33.0891	2.56664	4.74201e-06	0.000766518	up
Unigene0043523	0.1404	1.4155	0.1232	1.6842	4.4142	3.8336	2.5644	0.0024241	0.0492158	up
Unigene0044157	0.3046	1.4723	0.1459	4.5804	3.8674	2.9224	2.56398	0.00165008	0.0398577	up
Unigene0016130	0.6951	0.9267	0.074	2.9278	3.4121	3.6403	2.5571	0.00171781	0.0407023	up
Unigene0036388	0.8984	5.3025	0.4182	8.7418	18.6918	11.4796	2.55555	0.00132453	0.035221	up
Unigene0034425	0.5768	0.9526	0.1479	3.196	3.3909	3.2675	2.55463	0.000106019	0.00709131	up
Unigene0034218	28.9333	14.2494	7.9007	70.9292	127.955	101.016	2.55355	6.70992e-06	0.000980796	up
Unigene0021970	0.3649	0.418	0.182	2.1521	1.5826	1.9292	2.55334	0.000755942	0.0251758	up
Unigene0043317	0.23	2.1403	0.3977	4.1239	6.5541	5.531	2.54988	0.000859214	0.0270832	up
Unigene0043727	3.2497	4.2775	2.0671	10.8102	25.4305	19.8505	2.54752	9.66156e-06	0.00129768	up
Unigene0062852	0.5039	0.3149	0.201	1.5111	1.919	2.5214	2.54497	0.00163453	0.0396226	up
Unigene0006345	2.3048	13.7747	12.7227	35.6969	67.3453	64.9796	2.5444	6.79725e-05	0.00528536	up
Unigene0037449	0.4524	4.5235	2.4068	7.7789	18.6973	16.5733	2.54378	0.000846831	0.0269044	up
Unigene0036890	0.8497	6.3293	1.7086	16.6755	23.2556	11.8859	2.54356	0.00023041	0.0121281	up
Unigene0000033	1.7635	11.3548	11.1304	32.0543	67.435	41.415	2.53874	0.000169573	0.00986782	up
Unigene0033716	16.6814	37.4755	17.3164	124.043	117.646	173.243	2.5374	7.7079e-07	0.000197227	up
Unigene0040579	0.2623	0.6922	0.8025	4.6858	2.7754	2.7082	2.53305	0.000404503	0.0174779	up
Unigene0001724	1.3366	2.2664	1.8345	11.678	9.8073	9.8281	2.52576	2.46045e-07	8.06329e-05	up
Unigene0023199	0.6226	0.6822	0.3267	2.4487	3.3925	3.5302	2.52207	5.15218e-06	0.000816273	up
Unigene0050106	3.1903	7.7755	5.4099	39.3563	25.1104	29.5196	2.52089	6.84977e-06	0.000995158	up
Unigene0009529	7.7493	5.732	2.2157	26.8453	36.9663	26.2308	2.52012	1.1122e-05	0.00142286	up
Unigene0019732	0.3691	0.4613	0.8836	1.7712	3.5925	4.4609	2.51903	0.00204152	0.0447447	up
Unigene0024006	20.7774	20.599	5.5268	78.6998	108.276	81.4496	2.51676	1.79019e-05	0.00206231	up
Unigene0042572	0.307	0.8314	0.5022	2.6394	3.3517	3.374	2.51307	3.70912e-05	0.00349348	up
Unigene0042234	1.6826	2.466	0.3117	5.0702	11.7735	8.5787	2.51089	0.000280312	0.0137889	up
Unigene0052309	0.9417	0.8606	0.1939	3.474	4.1391	3.7629	2.51067	0.000337928	0.0155269	up
Unigene0019355	0.2847	0.3163	0.4354	1.8594	1.9476	2.0967	2.51004	0.000120863	0.00780067	up
Unigene0037123	3.2898	3.4145	1.0593	16.8478	13.5304	13.8195	2.50917	4.20575e-05	0.00383474	up
Unigene0036473	8.8704	23.652	3.3876	47.9871	89.4979	66.9062	2.50888	0.00015247	0.00919564	up
Unigene0001881	8.4841	9.0411	2.9937	40.7693	36.3905	39.2898	2.50468	3.12684e-06	0.000568134	up
Unigene0037486	0.6736	2.5903	1.5574	4.5581	12.2342	10.5666	2.50452	6.73215e-05	0.00525181	up
Unigene0048175	0.4759	2.1711	0.2184	3.5683	6.3237	6.3627	2.50405	0.000784821	0.025767	up
Unigene0049056	2.903	7.302	4.8714	16.5124	37.7265	31.201	2.50262	5.67252e-06	0.00087364	up
Unigene0005751	0.4391	0.4182	0.1502	2.2577	1.5928	1.848	2.4998	0.00219647	0.0466668	up
Unigene0027418	2.5599	7.4657	0.715	7.524	35.7484	17.4511	2.49918	0.00193884	0.0436209	up
Unigene0048729	2.6199	4.4676	0.8265	10.0379	16.1915	18.5006	2.49876	0.000202758	0.0111254	up
Unigene0032830	0.4567	0.1269	1.0327	5.398	2.2549	1.4758	2.49771	0.00219502	0.04665	up
Unigene0009410	5.5984	18.8517	1.9344	27.141	62.1813	59.6376	2.49716	0.000585458	0.021542	up
Unigene0051149	0.2326	0.8235	0.5103	2.7433	2.8046	3.2936	2.49684	0.000882483	0.0275236	up
Unigene0000394	0.3625	1.0803	0.5451	2.9434	3.8817	4.3911	2.49627	3.58264e-05	0.00339665	up
Unigene0006348	0.0997	1.3713	0.4776	3.2307	5.1072	2.6558	2.49617	0.00196607	0.0439527	up
Unigene0017368	0.3038	0.8859	0.3394	1.8099	3.2136	3.6023	2.49598	0.000144251	0.00888663	up
Unigene0030017	0.9661	0.6325	0.3304	1.4349	3.9714	5.473	2.49566	0.00227663	0.0475673	up
Unigene0041612	4.0079	11.1264	10.3367	26.1624	57.3767	59.9579	2.49409	8.82705e-06	0.00121131	up
Unigene0046739	0.3957	0.7773	0.4511	3.3005	2.7272	3.1172	2.49333	0.000108017	0.00719144	up
Unigene0016129	0.903	1.6094	0.8307	8.0845	5.1799	5.5135	2.48978	4.37426e-06	0.000723366	up
Unigene0007285	2.3122	14.7598	2.5644	18.4604	39.5353	52.1576	2.48791	0.000662925	0.0232112	up
Unigene0060655	0.156	0.3466	0.1867	0.8941	1.4962	1.4728	2.48656	0.000928157	0.0283097	up
Unigene0035472	0.787	1.4957	0.6942	4.3729	5.4923	6.8104	2.48586	7.66575e-06	0.00108515	up
Unigene0045931	3.6783	27.0116	26.855	66.5609	125.618	129.759	2.48402	0.000192452	0.0107997	up
Unigene0005459	1.0384	1.3992	0.3172	2.8871	6.543	5.9744	2.48333	7.46891e-05	0.00563704	up
Unigene0004515	0.7714	0.619	0.1824	2.3765	3.6514	2.7624	2.48258	0.000438187	0.0182417	up
Unigene0029735	49.6107	143.948	43.7934	279.692	570.77	474.969	2.48136	1.75358e-05	0.00204309	up
Unigene0062032	0.3521	0.3837	0.67	3.5525	2.6132	1.6776	2.48007	0.000242412	0.0125165	up
Unigene0006294	0.2381	1.1903	0.2533	3.7129	2.7201	2.9372	2.47816	0.00153858	0.0383287	up
Unigene0010496	0.3042	0.4648	0.2428	1.2977	2.9183	1.4172	2.47703	0.00208264	0.0452493	up
Unigene0039858	4.9473	4.227	1.3828	13.035	23.2522	22.3458	2.4735	2.63425e-05	0.00269658	up
Unigene0049207	2.9144	4.9881	2.7028	22.6152	18.5992	17.6705	2.47311	1.40511e-05	0.00171007	up
Unigene0056833	0.1831	0.6104	0.2923	1.5135	2.4799	2.0288	2.47153	0.00243559	0.0492679	up
Unigene0031067	0.4476	1.0741	0.1857	2.606	3.2123	3.6513	2.4715	0.000364944	0.0164024	up
Unigene0053955	0.6613	0.551	0.7036	3.7023	3.0783	3.8297	2.46937	0.00155033	0.0385007	up
Unigene0028300	0.615	0.9461	0.2265	2.9511	2.7626	4.1808	2.4686	0.000775659	0.0256067	up
Unigene0015114	4.9147	16.3326	4.5218	30.335	57.3521	54.8984	2.46811	4.84684e-05	0.00418601	up
Unigene0032108	173.734	382.602	286.316	965.663	1950.76	1734.22	2.46442	1.67759e-06	0.000362207	up
Unigene0010165	1.6002	0.4961	0.3564	2.8274	5.7006	5.0034	2.46387	0.000757864	0.0251834	up
Unigene0033246	1.0292	1.0833	0.4323	2.9459	6.5101	4.5827	2.46379	0.000444411	0.018362	up
Unigene0009660	0.5039	0.8397	0.2234	2.0596	4.1222	2.4527	2.46211	0.00170345	0.0405225	up
Unigene0005989	11.3898	26.3097	20.5716	65.4349	137.636	117.697	2.46067	3.63777e-06	0.000627604	up
Unigene0028600	2.2412	1.4483	1.4965	9.4378	8.71	10.2957	2.4554	1.7726e-05	0.00205379	up
Unigene0003718	7.5641	23.0383	6.1737	70.0599	65.1665	66.3156	2.45424	2.00659e-05	0.0022397	up
Unigene0069567	0.3709	0.3348	0.1727	1.0135	1.6219	2.1712	2.45207	0.00106236	0.0308811	up
Unigene0041299	2.7528	5.7703	1.2357	14.2415	19.6213	19.4936	2.45089	7.52489e-05	0.00565509	up
Unigene0069598	0.1161	0.6129	0.3398	1.3932	2.3917	2.0468	2.44792	0.00199808	0.0442463	up
Unigene0032003	0.7171	4.1428	3.0392	8.1182	17.0741	17.8264	2.4452	0.000160248	0.00953648	up
Unigene0044313	0.3016	1.2775	0.2006	2.7739	3.5523	3.3602	2.44433	0.00118623	0.0331525	up
Unigene0026013	0.3779	0.6298	0.2681	1.9477	2.3809	2.6007	2.44131	0.000801125	0.0261111	up
Unigene0033697	0.2053	0.308	0.3605	1.8063	1.0774	1.8611	2.44097	0.00160625	0.0392377	up
Unigene0053011	3.0719	7.7603	4.7083	17.2757	38.6681	28.4337	2.44083	1.97598e-05	0.00221588	up
Unigene0037665	0.4416	0.4762	0.0829	1.1218	1.9566	2.3545	2.44071	0.00173464	0.0409659	up
Unigene0048947	1.3907	1.9649	0.8846	4.4004	8.2046	10.4129	2.44055	2.54332e-05	0.00262674	up
Unigene0038658	0.4267	0.2844	0.5448	2.9004	1.9138	1.9981	2.43942	0.000706678	0.0242555	up
Unigene0042043	0.9351	2.4195	0.7855	5.2152	7.9763	9.2563	2.43884	7.91861e-05	0.00584566	up
Unigene0041729	13.1635	108.428	61.7142	219.765	369.328	404.452	2.43833	0.0002142	0.0115414	up
Unigene0035893	3.9542	10.7387	7.7425	33.8201	44.6518	42.7827	2.43419	5.07097e-06	0.000808763	up
Unigene0025880	0.5165	0.3972	0.1902	2.7643	1.5131	1.6805	2.43219	0.00121408	0.0335751	up
Unigene0047987	3.7345	4.9437	0.2163	12.9103	21.2451	13.7061	2.42788	0.00212616	0.0457103	up
Unigene0043366	14.3803	24.517	12.8899	62.7473	122.962	92.8066	2.42709	1.65796e-06	0.000360582	up
Unigene0018521	0.3813	0.556	0.2282	1.8297	2.0573	2.3761	2.42593	0.00115074	0.0324951	up
Unigene0008294	10.9397	12.7768	5.0428	43.5737	62.1366	48.5958	2.42369	2.34121e-06	0.000465453	up
Unigene0045630	1.7672	4.0947	2.5414	8.3591	18.7154	18.0025	2.42336	1.02762e-05	0.00134921	up
Unigene0012095	0.3179	0.555	0.2658	1.1864	2.6263	2.2868	2.4213	0.000210382	0.0114214	up
Unigene0028291	1.1955	4.168	0.9289	6.5921	13.2597	13.7827	2.41826	0.000290219	0.014131	up
Unigene0046903	1.2086	2.3547	1.2339	10.6324	7.5211	7.4509	2.41613	7.98993e-06	0.00111564	up
Unigene0018852	0.4109	0.428	0.4509	1.9307	2.0432	2.9098	2.41604	0.000882811	0.0275236	up
Unigene0021825	0.2852	0.3395	0.4227	0.8799	2.7245	1.9699	2.41198	0.00194081	0.0436377	up
Unigene0001542	3.6224	21.5089	3.9399	72.8777	32.0887	49.6973	2.41147	0.000526617	0.0202693	up
Unigene0052274	6.3182	9.9901	7.7452	25.5392	53.7309	48.3567	2.40761	3.79248e-06	0.000652726	up
Unigene0029104	0.2457	0.8052	0.2222	2.2138	2.5507	1.9795	2.40526	0.000443207	0.0183337	up
Unigene0032304	0.6968	1.8227	1.3577	6.6221	7.7209	6.1932	2.40508	1.37055e-05	0.00167571	up
Unigene0045429	0.538	0.5764	0.7565	1.7929	3.8271	4.2768	2.40323	4.29839e-05	0.00388045	up
Unigene0006033	0.8956	3.774	1.848	6.9991	15.1274	12.3413	2.40284	7.97262e-05	0.00585665	up
Unigene0042529	5.4527	18.4957	5.3621	32.7128	64.3856	57.5218	2.39924	5.90264e-05	0.00479222	up
Unigene0011524	3.0699	9.1444	3.808	37.4041	19.1505	27.8734	2.39764	1.93711e-05	0.0021791	up
Unigene0039876	7.0742	5.2684	2.3367	19.8537	35.7037	21.7654	2.39711	2.05873e-05	0.00228017	up
Unigene0008008	0.4265	1.5707	0.56	3.2903	4.5416	5.6331	2.39658	0.000133663	0.00842968	up
Unigene0012297	0.2751	0.3209	0.3512	1.3419	2.5841	1.0596	2.39603	0.000893839	0.0276884	up
Unigene0049070	15.4184	52.6279	17.6697	183.854	136.834	130.441	2.3959	2.11306e-05	0.00231181	up
Unigene0040485	1.3498	2.4378	0.8475	8.2961	7.6775	8.3736	2.39308	7.94765e-06	0.0011119	up
Unigene0042391	1.1293	1.5956	0.6269	4.3882	6.3164	6.8983	2.39281	1.61203e-05	0.00190288	up
Unigene0046238	0.5069	0.4224	0.4551	2.939	1.9841	2.3451	2.39234	0.00135806	0.0357417	up
Unigene0050319	2.1895	7.2067	5.8174	13.4919	33.3333	32.9115	2.38988	4.25171e-05	0.00385284	up
Unigene0065867	65.5395	73.5602	35.7915	334.262	355.867	226.232	2.38946	1.80651e-06	0.000380214	up
Unigene0002413	0.1744	0.6395	0.5567	1.088	3.1884	2.8983	2.38811	0.00198303	0.0440717	up
Unigene0039964	0.9942	1.5977	0.4534	3.6916	6.0102	6.2223	2.38656	0.000880866	0.0275228	up
Unigene0045626	1.377	2.1287	0.9398	9.3463	6.5477	7.3492	2.38639	1.22388e-05	0.00153832	up
Unigene0009603	1.2231	2.0701	0.7168	3.0568	8.3944	9.5129	2.38625	0.000149296	0.00908154	up
Unigene0006714	0.3316	0.4452	0.2646	1.827	1.6216	1.99	2.38471	0.000186291	0.0105359	up
Unigene0030408	0.9178	1.5031	1.1365	5.695	5.7052	7.1716	2.38422	3.5397e-05	0.00336483	up
Unigene0037044	0.4887	0.6277	0.3981	2.6869	2.1196	3.0913	2.38261	1.76636e-05	0.00205132	up
Unigene0029045	0.7316	0.9144	0.8433	3.6732	3.5947	5.695	2.38058	3.16067e-05	0.00308209	up
Unigene0042974	1.178	1.1382	0.72	3.5279	6.3955	5.8689	2.37888	1.05615e-05	0.00137568	up
Unigene0010160	2.2263	1.2567	0.5158	6.835	7.1722	6.7809	2.37812	0.000679228	0.0235741	up
Unigene0018007	0.2143	0.4643	0.2908	1.0628	1.8866	2.0885	2.37766	0.000583689	0.0215068	up
Unigene0005301	30.7261	82.9305	26.4369	158.325	306.177	263.404	2.37736	2.48848e-05	0.00259591	up
Unigene0037955	0.3438	0.3342	0.16	1.6955	0.9214	1.7312	2.37536	0.00139246	0.0362133	up
Unigene0052434	0.744	0.5166	0.3958	2.0825	3.2532	3.2547	2.37467	0.000303097	0.014529	up
Unigene0046837	0.9989	3.5375	1.395	12.5826	9.5344	8.6351	2.37424	8.52601e-05	0.00612524	up
Unigene0021500	0.2522	0.5136	0.2683	1.7253	1.3279	2.3067	2.37383	0.000807154	0.0262124	up
Unigene0017110	0.8128	1.1287	0.2162	2.7445	5.1591	3.2743	2.37308	0.000628799	0.0225194	up
Unigene0021353	1.3759	2.9071	1.4117	4.5587	15.5537	9.3533	2.37134	0.000332197	0.0153521	up
Unigene0007614	18.1746	106.371	28.5101	146.349	499.276	145.508	2.36987	0.000890396	0.0276639	up
Unigene0032291	1.0559	3.6018	3.2652	7.5739	12.2319	21.0361	2.36595	0.000168013	0.00980349	up
Unigene0048330	2.7109	5.844	2.6793	11.6095	25.1114	21.0716	2.36298	1.33898e-05	0.00164834	up
Unigene0036133	0.525	3.5578	2.2343	6.3538	13.9215	12.2133	2.3626	0.000584043	0.0215068	up
Unigene0009205	1.7996	3.7072	1.1968	7.0364	13.2423	14.1975	2.36259	0.000195903	0.0108992	up
Unigene0012365	2.285	2.3042	1.1266	10.092	9.2877	10.0152	2.36254	5.35118e-06	0.000838546	up
Unigene0022257	0.2886	0.687	0.2303	2.1101	1.919	2.1486	2.35696	0.00160129	0.0391566	up
Unigene0002433	2.7421	4.1476	2.0693	11.7043	18.1626	16.0073	2.35627	9.7508e-06	0.00130379	up
Unigene0032782	3.8544	1.2695	0.5958	5.915	13.6975	9.6716	2.35611	0.000435855	0.0182201	up
Unigene0038641	1.3086	1.1994	0.1492	2.5118	6.7559	4.3351	2.35592	0.0016139	0.0393175	up
Unigene0050826	1.2757	4.597	0.4363	7.2478	13.1663	11.8384	2.35393	0.00115956	0.0326359	up
Unigene0011191	7.5878	26.1882	8.4557	53.539	92.4902	69.5913	2.3521	6.48081e-05	0.00510568	up
Unigene0017319	0.3239	0.3036	0.3554	1.0038	1.4735	2.5384	2.35133	0.00220423	0.0467576	up
Unigene0046826	0.5355	0.9908	0.2262	2.0783	3.459	3.4024	2.35081	0.000143596	0.00885388	up
Unigene0041586	0.9093	1.3935	1.0236	5.1683	5.593	6.2058	2.35071	7.48677e-06	0.00106401	up
Unigene0043984	0.101	0.8976	0.591	1.6422	3.1766	3.28	2.34904	0.00161881	0.0393887	up
Unigene0004641	3.9195	5.3223	3.7842	15.1896	24.1216	27.0108	2.34809	3.5991e-06	0.000624561	up
Unigene0064272	0.2643	0.5229	0.2109	1.6907	1.5935	1.7964	2.34774	0.00127374	0.0344448	up
Unigene0033386	0.9208	2.0331	0.4776	6.9037	5.3575	5.1814	2.3457	0.000224039	0.0118966	up
Unigene0006800	0.2164	0.4208	0.2303	1.1251	1.8928	1.3896	2.34502	0.00209931	0.0453953	up
Unigene0035317	0.4836	0.8243	0.4035	2.2328	3.6838	2.773	2.34411	0.000198497	0.0109839	up
Unigene0026876	0.5434	0.4527	0.3195	2.0127	2.0815	2.5705	2.34082	0.000387287	0.0170212	up
Unigene0047132	1.8453	4.3172	1.5859	14.517	13.5604	11.1241	2.33894	2.34565e-05	0.00249035	up
Unigene0035763	27.4772	30.8444	10.6552	98.002	134.868	115.344	2.33579	8.15833e-06	0.00113474	up
Unigene0004083	1.2081	2.3657	0.5784	5.7006	7.7452	7.5057	2.33511	0.000230286	0.0121281	up
Unigene0040449	0.3391	1.201	0.3518	2.7937	3.5447	3.2021	2.33423	0.000413565	0.0176887	up
Unigene0036918	0.2229	0.2704	0.1467	0.8412	0.9266	1.4591	2.33401	4.08732e-05	0.00374167	up
Unigene0023401	0.0922	0.24	0.331	0.5805	1.2092	1.5492	2.33186	0.00125616	0.0342534	up
Unigene0040985	0.742	0.6641	0.1316	2.8135	2.2795	2.6157	2.32571	0.00138655	0.0361626	up
Unigene0045776	0.9233	2.9713	0.8639	10.822	6.2246	6.8059	2.32556	0.000337828	0.0155269	up
Unigene0050820	24.2815	25.4092	14.7484	86.6959	90.3571	145.935	2.32547	2.12448e-06	0.000430718	up
Unigene0035662	1.2856	7.8066	0.8446	9.0039	21.7617	18.9821	2.32378	0.00188904	0.0430401	up
Unigene0017632	1.9623	7.5022	1.1054	19.4788	15.0447	18.3098	2.32149	0.00162672	0.0395039	up
Unigene0038835	4.5721	5.1766	3.8853	25.2754	23.8082	18.955	2.31914	1.35106e-06	0.000311787	up
Unigene0010787	0.1648	1.533	0.5478	2.1961	3.9508	5.0505	2.31799	0.00167177	0.0401953	up
Unigene0008524	0.3027	1.063	0.1553	2.2309	2.7268	2.6133	2.31546	0.00198814	0.0441215	up
Unigene0042511	0.2038	1.2312	0.4066	1.6504	4.3985	3.1174	2.31538	0.00246912	0.0496944	up
Unigene0047767	2.2837	2.2412	1.0934	7.4984	9.6746	10.7523	2.31337	1.02831e-05	0.00134921	up
Unigene0008863	0.1003	0.1672	0.0601	0.4313	0.7218	0.4737	2.31203	0.00240739	0.0490152	up
Unigene0021654	0.9627	1.9609	1.067	4.3844	7.8537	7.5749	2.31177	8.85066e-05	0.00629237	up
Unigene0035158	0.8994	1.4548	1.0555	3.4272	7.3432	6.1541	2.3114	0.000385523	0.0169748	up
Unigene0042820	3.5008	12.9464	2.5739	18.0257	38.1842	37.8821	2.30647	0.000460466	0.0188063	up
Unigene0039756	0.4923	7.3411	2.8073	10.9997	22.5253	19.0887	2.30585	0.00189639	0.0430724	up
Unigene0060631	4.3368	28.1265	15.5199	47.8778	88.8831	100.265	2.30444	0.000334513	0.0154293	up
Unigene0016494	10.6347	32.3066	10.5944	51.8211	100.483	111.922	2.3032	7.63721e-05	0.00570367	up
Unigene0020853	0.3228	0.3586	0.4293	1.3984	2.1857	1.8897	2.30107	0.000663805	0.0232283	up
Unigene0039068	0.6771	0.3611	2.1398	8.8595	3.3009	3.4779	2.29889	0.00210033	0.0453953	up
Unigene0045521	0.7408	4.9608	0.7444	7.4603	15.1858	8.9733	2.29433	0.00198339	0.0440717	up
Unigene0039207	0.3366	0.4768	0.7521	1.5615	4.3304	1.7799	2.29294	0.00175956	0.0412885	up
Unigene0046453	1.8742	2.2396	1.1956	7.4451	9.9113	8.6168	2.2904	3.55242e-06	0.000622223	up
Unigene0034504	0.9154	1.5181	0.8021	5.3186	5.051	5.4503	2.28964	8.5786e-06	0.00117947	up
Unigene0031434	0.2866	0.2388	0.4574	1.1748	1.4858	2.1379	2.28761	0.00208973	0.0453112	up
Unigene0032640	0.4942	1.0658	0.4175	3.092	3.6165	2.9422	2.28696	0.00048271	0.0192632	up
Unigene0020654	1.181	0.9601	0.477	3.6572	4.6746	4.4332	2.2856	1.94072e-05	0.00217974	up
Unigene0002652	0.5881	1.0192	0.4505	3.7154	2.9762	3.3403	2.28542	5.37062e-05	0.00451346	up
Unigene0036760	15.4066	44.2212	7.0007	64.732	143.3	116.748	2.28525	0.000414357	0.0177066	up
Unigene0023280	0.383	0.5141	0.1698	1.5314	1.9807	1.6874	2.28495	0.000838752	0.026802	up
Unigene0026069	0.639	0.5153	0.4112	2.0771	3.018	2.5223	2.28268	0.000201592	0.0110868	up
Unigene0001127	5.2306	12.9137	4.9028	21.4473	50.1473	40.5333	2.28249	7.07242e-05	0.00545793	up
Unigene0005198	0.9523	1.1285	0.2871	3.4019	3.9761	4.1401	2.28222	0.000382479	0.0168926	up
Unigene0042573	0.5737	1.7672	0.3538	2.9057	5.2672	4.9044	2.27887	0.000399849	0.0173444	up
Unigene0052374	0.8183	1.938	1.1342	3.6858	7.655	7.5152	2.277	0.000414921	0.0177066	up
Unigene0063572	4.8273	12.3718	6.4496	21.4678	45.7456	47.1808	2.27418	5.42173e-05	0.00455108	up
Unigene0004131	0.7062	1.7652	0.5363	5.8298	3.9426	4.7662	2.27316	0.000115022	0.00753207	up
Unigene0056014	1.7879	1.3433	0.8186	5.4853	6.6481	6.9518	2.2726	8.4335e-05	0.00609078	up
Unigene0031422	1.3213	2.6738	0.9289	6.6424	7.0026	10.1231	2.27112	0.000165878	0.00974009	up
Unigene0047677	2.0137	3.4079	1.1877	6.6618	13.0199	12.1681	2.26871	5.53064e-05	0.00458884	up
Unigene0002629	0.7889	0.7439	0.4639	1.4279	4.2697	3.9204	2.26812	0.000489201	0.0194354	up
Unigene0001278	0.1451	0.1776	0.152	0.6492	0.7791	0.8529	2.2647	8.59005e-05	0.00615277	up
Unigene0049422	1.0357	1.8247	0.8816	3.6053	7.0461	7.2945	2.26177	3.9889e-05	0.00369875	up
Unigene0031002	6.6715	19.8227	11.6899	83.4145	39.2433	60.436	2.26154	4.17327e-05	0.00381063	up
Unigene0012337	0.4489	0.5189	0.3005	1.5983	2.5003	1.9799	2.26082	0.000205769	0.0112366	up
Unigene0024100	10.3302	19.4955	6.442	53.5644	45.4513	74.6701	2.25972	5.07401e-05	0.00435079	up
Unigene0033197	0.8339	1.1581	0.3105	2.8899	3.811	4.3251	2.25964	0.00188441	0.042962	up
Unigene0033064	0.1912	0.8286	0.5494	2.034	2.3305	3.1488	2.25942	0.000825072	0.026554	up
Unigene0044804	0.6695	0.7883	0.4646	3.1079	3.0056	3.0892	2.25915	6.06956e-05	0.00490003	up
Unigene0000036	8.4855	6.3589	2.088	24.7912	27.8958	28.369	2.25913	6.76052e-05	0.0052625	up
Unigene0044073	0.532	1.256	0.4953	3.7939	4.3525	2.7795	2.25856	0.00109997	0.0315425	up
Unigene0023149	0.3857	0.8319	0.8148	4.3189	2.1892	3.1878	2.25419	0.000374443	0.0166814	up
Unigene0041346	43.9238	30.9268	13.6147	127.657	171.224	122.736	2.25275	2.49506e-05	0.002599	up
Unigene0046266	1.6149	6.6441	3.5977	12.633	23.7191	20.0762	2.25072	0.000132459	0.00836845	up
Unigene0044890	0.418	1.2191	0.6984	2.4551	4.0685	4.5783	2.249	0.00017879	0.0102019	up
Unigene0047439	1.5948	2.5076	1.323	6.3702	10.4015	9.0178	2.24898	1.19351e-05	0.00150277	up
Unigene0038595	5.577	2.2212	1.6514	14.054	16.1193	14.7042	2.24767	0.000122485	0.00789115	up
Unigene0036008	0.9163	0.818	0.8618	4.8157	3.9606	3.5348	2.24554	0.000184771	0.0104727	up
Unigene0032993	0.4991	1.8119	0.7823	5.8728	4.2086	4.5639	2.24322	0.000265468	0.0132956	up
Unigene0047687	4.5147	14.5267	4.3756	23.1507	45.1239	42.4556	2.24142	0.000146817	0.00899078	up
Unigene0029469	0.2658	0.8028	0.3977	1.9794	2.3618	2.5847	2.23982	0.000498275	0.0196382	up
Unigene0038421	2.838	3.5033	0.7549	7.8179	10.4081	15.2437	2.23774	0.00175885	0.0412885	up
Unigene0020345	0.4165	1.2969	0.4898	3.4539	3.5808	3.3449	2.23608	0.000479285	0.0192169	up
Unigene0034797	0.9981	1.5934	0.6178	4.8491	4.8631	5.4042	2.23578	3.20758e-05	0.00311513	up
Unigene0036355	3.9169	6.7768	2.6916	23.5814	19.3606	20.0528	2.23458	2.44647e-05	0.00256045	up
Unigene0043325	1.6287	11.4156	13.3282	28.2986	38.6225	57.1929	2.23456	0.00093824	0.0285207	up
Unigene0006115	1.1307	0.6374	0.3185	2.8991	3.279	3.6173	2.23095	0.000349186	0.0159017	up
Unigene0028985	0.7139	1.533	0.5259	4.8973	3.9276	4.169	2.22842	0.000399305	0.0173444	up
Unigene0046740	0.5827	1.0867	0.31	3.2843	3.2642	2.7247	2.228	0.000885147	0.0275486	up
Unigene0007556	15.259	29.7911	23.9092	149.115	82.6702	91.0289	2.22689	1.99593e-05	0.00223127	up
Unigene0044599	3.0844	4.2297	2.6159	8.4623	21.0241	16.9355	2.22494	2.80873e-05	0.00281933	up
Unigene0044468	0.6961	0.7699	0.2323	2.5205	2.7208	2.696	2.22456	0.000309736	0.0146925	up
Unigene0007745	0.454	1.261	0.3623	2.2089	3.8105	3.6866	2.22417	0.00199436	0.0441912	up
Unigene0044522	0.7763	1.2243	0.531	3.5475	2.9329	5.3189	2.22058	0.00042479	0.0178949	up
Unigene0009212	0.9764	0.7019	0.4278	1.1637	6.1249	2.5163	2.21893	0.0018479	0.0425759	up
Unigene0035760	1.8165	5.3799	1.507	15.5774	11.2941	13.6255	2.21816	0.000161274	0.00956584	up
Unigene0052411	0.538	1.4061	0.4293	4.0486	3.4358	3.5467	2.21655	0.000633606	0.0226238	up
Unigene0029727	2.3797	7.1453	3.1432	11.638	23.0805	24.0804	2.21458	0.000108008	0.00719144	up
Unigene0041568	2.8306	4.9194	2.0652	5.6595	20.3288	19.5482	2.21393	0.000426568	0.0179559	up
Unigene0011244	13.504	58.6968	25.7511	115.2	207.008	132.029	2.2133	0.000169665	0.00986782	up
Unigene0001077	9.1969	20.0817	13.9871	43.0112	83.2269	74.3368	2.21285	1.85353e-05	0.00210487	up
Unigene0014439	0.553	1.2442	0.9268	3.096	3.4167	6.0987	2.21093	0.00141887	0.0365123	up
Unigene0012488	0.5604	1.1674	0.8705	5.1302	3.1591	3.7266	2.2093	4.57517e-05	0.00404613	up
Unigene0036812	2.1493	2.7093	1.0994	7.2062	9.4915	10.8438	2.20871	8.31782e-05	0.00603572	up
Unigene0043063	0.407	0.5571	0.9743	1.8366	3.5181	3.601	2.20794	0.00098187	0.029228	up
Unigene0042488	1.8279	2.951	1.0159	8.8887	10.8705	6.9404	2.20399	7.57318e-05	0.00567356	up
Unigene0045177	9.1125	6.1183	4.3721	27.1638	34.4184	28.5706	2.20131	1.00549e-05	0.00133637	up
Unigene0046177	1.007	1.8579	0.6314	5.8674	5.0322	5.1431	2.19802	0.000246684	0.0126461	up
Unigene0029805	4.4072	3.4399	0.9349	5.4879	17.9418	16.8135	2.19612	0.00169021	0.040398	up
Unigene0035225	5.2442	29.1977	51.2966	88.1715	157.36	147.194	2.1955	0.00112878	0.0320842	up
Unigene0014021	1.8754	6.6559	1.6629	12.1658	18.0475	16.4744	2.19529	0.000911714	0.028011	up
Unigene0045686	1.0089	1.9203	0.5932	3.958	6.1209	6.0324	2.19344	0.000129907	0.00823621	up
Unigene0002144	0.9751	1.2966	0.4139	2.2732	4.8639	5.1402	2.19268	0.000661641	0.0231865	up
Unigene0045929	1.255	0.8817	0.3338	3.4243	4.8941	2.9553	2.19009	0.00082022	0.0264742	up
Unigene0000457	0.851	0.8165	0.2264	2.9285	2.4879	3.2138	2.18803	0.00123724	0.0339681	up
Unigene0047004	4.1205	3.1367	3.8565	9.9677	29.0181	11.6427	2.18761	0.000212732	0.0114941	up
Unigene0004377	1.5646	2.8695	0.9525	9.9781	7.1669	7.3771	2.18664	6.13677e-05	0.00493808	up
Unigene0057284	2.7775	2.893	3.5226	8.9648	19.6454	13.2249	2.18609	9.88882e-05	0.00676569	up
Unigene0051451	0.998	1.7625	1.0579	3.9075	6.5808	6.886	2.18591	5.80876e-05	0.00473744	up
Unigene0012045	4.5936	9.3728	0.8459	13.3529	31.7999	22.22	2.18537	0.00227466	0.0475576	up
Unigene0043003	10.6025	6.313	2.1752	29.2835	26.1026	31.4345	2.18517	0.000193916	0.010839	up
Unigene0048066	1.3878	1.7297	0.5725	4.3597	5.5194	6.8804	2.18329	7.05521e-05	0.00545638	up
Unigene0022503	0.9089	0.8574	0.7116	2.4002	4.3615	4.4884	2.18275	3.35905e-05	0.00322729	up
Unigene0040450	0.3511	0.6144	0.3643	1.3761	2.3478	2.3075	2.18128	0.00187251	0.0428194	up
Unigene0011709	0.8525	2.2297	0.7842	3.6646	7.8362	6.0278	2.18065	0.000238334	0.0123861	up
Unigene0017950	0.5459	1.1238	0.3203	2.6453	3.6962	2.6803	2.18065	0.000591115	0.021667	up
Unigene0000741	0.4968	0.6505	0.2266	2.1712	2.4478	1.6083	2.18033	0.000840475	0.0268204	up
Unigene0021911	2.4072	3.1023	1.6392	5.8783	14.2069	12.2916	2.17921	0.000146819	0.00899078	up
Unigene0032548	0.6265	1.7401	0.7222	4.3982	4.5365	5.0478	2.1785	0.00193651	0.0436156	up
Unigene0046458	1.7216	2.9643	1.7994	6.2082	11.4309	11.6922	2.1772	2.44736e-05	0.00256045	up
Unigene0027632	0.4208	1.3776	0.4558	3.1974	4.1977	2.7928	2.17617	0.00152949	0.0382296	up
Unigene0038939	6.0285	16.3083	6.0964	45.7615	42.4798	40.2053	2.17552	4.08163e-05	0.00374123	up
Unigene0011213	1.048	1.1575	0.5154	2.6605	4.3727	5.2556	2.17519	0.000135957	0.00852845	up
Unigene0035459	0.6129	1.3929	0.3409	2.9264	3.7885	3.8723	2.17362	0.000758274	0.0251834	up
Unigene0039808	0.7369	0.6613	0.8142	3.5814	3.742	2.6546	2.17314	0.00140395	0.0363628	up
Unigene0038910	2.075	4.9228	2.1977	17.5965	10.6772	13.1769	2.17239	4.43097e-05	0.00396961	up
Unigene0042319	0.5039	2.0392	1.1488	6.3899	4.569	5.6817	2.17227	0.00087306	0.0273981	up
Unigene0011756	0.3011	0.7736	0.3805	2.1875	2.2087	2.1608	2.17182	0.00117249	0.0329247	up
Unigene0039385	19.3737	45.5223	38.8933	96.8766	190.139	180.597	2.17166	2.98547e-05	0.00295541	up
Unigene0035283	0.4401	0.7105	0.2854	1.5399	2.6074	2.3063	2.16805	0.00157553	0.0388843	up
Unigene0046935	0.6085	1.3352	0.3237	2.271	4.3946	3.5238	2.16796	0.00120487	0.033451	up
Unigene0008666	1.0021	0.7859	1.0349	3.8894	4.7644	4.0296	2.16769	0.000221592	0.0118243	up
Unigene0060854	0.2435	0.634	0.4857	2.5314	1.7258	1.8621	2.16637	0.00187132	0.0428194	up
Unigene0040160	52.7821	36.5479	19.0983	146.319	224.075	116.024	2.16546	4.21682e-05	0.0038354	up
Unigene0042846	0.7825	1.6735	0.3955	3.6088	4.5033	4.6693	2.16425	0.000965339	0.0289763	up
Unigene0025500	44.7416	149.789	12.8476	192.409	392.907	343.62	2.16332	0.00237656	0.048733	up
Unigene0044280	2.0018	1.5489	0.9128	3.7737	5.9298	10.2605	2.16115	0.00095627	0.0287884	up
Unigene0049694	1.1577	1.7499	0.9668	3.4022	6.4942	7.4229	2.16034	0.000283442	0.0138953	up
Unigene0036449	1.7582	1.8262	1.8643	7.3195	7.868	9.1688	2.16031	2.52287e-05	0.00261657	up
Unigene0051074	7.6144	8.6519	2.8409	27.206	34.6489	23.3796	2.15732	0.000258854	0.0130923	up
Unigene0011781	3.975	16.5136	5.6644	17.8481	41.1873	57.5623	2.15649	0.000930211	0.0283367	up
Unigene0004666	2.8042	1.4019	1.2084	6.1001	11.629	6.3967	2.15568	0.000810953	0.0263001	up
Unigene0016152	1.8948	1.3837	0.9854	4.8356	6.5947	7.5582	2.15488	9.42585e-05	0.00651706	up
Unigene0021394	0.4642	0.6546	0.7124	2.4844	3.8681	1.7801	2.15093	0.00156266	0.0386586	up
Unigene0029234	34.4865	15.4564	7.7662	60.0199	126.367	69.7606	2.15011	0.000409786	0.0176016	up
Unigene0010400	1.5056	2.5509	0.6608	4.1342	8.6861	8.0935	2.14842	0.000660381	0.0231865	up
Unigene0003958	0.9822	1.1952	0.5723	3.3168	4.8031	4.0276	2.14331	0.000136859	0.00855608	up
Unigene0038062	0.6485	0.7719	0.345	2.0744	2.5088	3.1954	2.13952	0.0012908	0.0346839	up
Unigene0041889	0.804	1.0183	0.385	2.3664	4.4367	2.9152	2.13842	0.00135084	0.0356142	up
Unigene0013004	0.9606	1.4126	0.62	5.1407	3.6825	4.343	2.13708	0.000116694	0.00762068	up
Unigene0043886	0.9299	1.3207	0.7252	3.972	4.4716	4.6294	2.13524	0.000166968	0.0097743	up
Unigene0042345	0.5311	0.5833	0.2697	2.1622	1.9409	1.9692	2.13329	0.00113071	0.0320882	up
Unigene0047347	82.2439	119.245	67.0592	330.575	439.123	407.768	2.13243	5.58594e-06	0.000865881	up
Unigene0002355	1.9126	2.4162	1.354	5.5511	9.1771	10.1711	2.13143	5.34325e-05	0.00450188	up
Unigene0023028	0.8539	1.3392	0.5611	3.9969	3.8258	4.2301	2.12966	0.000387599	0.0170245	up
Unigene0049189	0.7952	2.7752	0.3584	3.1126	7.4428	6.6144	2.12771	0.00243468	0.0492633	up
Unigene0047765	2.1476	3.4045	1.3376	12.1489	8.3788	9.575	2.12738	0.000118035	0.0076803	up
Unigene0050409	0.5977	3.1594	1.5017	9.9524	5.8805	7.1423	2.12727	0.000447438	0.0184343	up
Unigene0008163	3.2171	7.1455	4.5826	30.006	15.7606	19.4571	2.12571	4.59467e-05	0.00404613	up
Unigene0047511	1.7238	3.9938	1.8118	13.7695	7.8995	11.1708	2.12484	8.09651e-05	0.00592358	up
Unigene0041193	0.7024	0.8214	0.236	1.5177	3.2747	2.8761	2.12353	0.000984947	0.0292832	up
Unigene0041345	5.3767	27.2255	7.9212	31.8372	59.5941	84.6619	2.11951	0.00145238	0.0369897	up
Unigene0027311	0.699	0.6338	0.3117	2.6637	2.3316	2.143	2.11793	0.000766045	0.0253702	up
Unigene0022452	2.0348	4.1446	2.7785	6.4733	17.719	14.6868	2.11776	0.000396423	0.0172641	up
Unigene0043279	5.0479	9.3425	3.0212	18.8268	28.0567	28.5966	2.11605	0.000179924	0.0102538	up
Unigene0007824	4.8272	5.7282	1.3586	19.7857	13.2412	18.6055	2.11562	0.000318088	0.0149406	up
Unigene0040021	14.1585	20.3976	10.5077	46.3476	75.2875	73.532	2.11467	1.52544e-05	0.00181861	up
Unigene0003246	0.7323	1.7669	1.0061	6.5747	4.4946	4.1028	2.11381	7.59181e-05	0.00568159	up
Unigene0014039	1.1774	2.0407	0.6389	7.3072	4.9027	4.4824	2.11363	0.00140957	0.036407	up
Unigene0067459	1.8857	8.5766	4.5145	14.0131	29.1264	21.6625	2.11331	0.0010092	0.0297481	up
Unigene0060778	10.8129	16.4391	9.1838	29.6351	59.5107	68.4924	2.11319	8.08305e-05	0.00592358	up
Unigene0043757	0.8293	2.6488	1.5809	3.9794	8.7342	9.1698	2.11291	0.000569162	0.0212754	up
Unigene0025844	31.0282	40.3029	18.7488	84.106	182.893	122.181	2.11116	4.05688e-05	0.0037267	up
Unigene0022428	2.1976	2.4687	1.299	7.5771	8.9965	9.1728	2.1097	4.04739e-05	0.00372412	up
Unigene0044310	1.2948	0.5885	0.5323	3.1067	3.5533	3.764	2.10946	0.00153539	0.03832	up
Unigene0003700	0.7887	2.8336	0.8746	7.5694	6.0597	5.6945	2.10336	0.000410333	0.0176016	up
Unigene0067484	17.6952	74.3729	51.465	116.024	245.016	255.665	2.1032	0.000307394	0.0146492	up
Unigene0002936	0.4988	0.3562	0.4549	1.909	1.7488	1.9645	2.1017	0.00216225	0.046213	up
Unigene0008890	1.7939	2.2479	1.8578	9.7474	6.896	8.6785	2.1017	1.992e-05	0.00223035	up
Unigene0006035	2.0782	6.1796	2.8616	21.0418	14.0707	12.5477	2.09971	0.000148316	0.00905777	up
Unigene0000591	12.647	23.0304	18.9149	51.6449	91.5127	90.7208	2.09899	4.45732e-05	0.00397613	up
Unigene0019468	0.3102	0.4092	0.3507	1.075	1.969	1.523	2.0935	0.00239589	0.0489066	up
Unigene0064386	0.6547	0.4923	0.395	1.8389	2.2298	2.5087	2.09271	0.000469691	0.0190128	up
Unigene0037954	1.4522	1.2951	0.6289	4.132	4.6073	5.6332	2.08984	7.10565e-05	0.00547181	up
Unigene0036506	1.6183	3.41	2.8808	11.7228	8.8103	13.1287	2.08953	5.55522e-05	0.00460254	up
Unigene0030100	0.8924	1.1331	0.4408	2.311	4.7473	3.4345	2.08898	0.00240236	0.0489545	up
Unigene0042325	2.1443	1.611	0.5049	4.92	7.9734	5.2043	2.08681	0.00148715	0.0374501	up
Unigene0033224	1.3442	2.5847	1.939	4.7136	12.6014	7.5758	2.0847	0.000962037	0.0289135	up
Unigene0051072	4.4612	8.1495	2.7385	19.4863	21.7102	23.8475	2.08325	0.000381792	0.0168831	up
Unigene0012597	0.3296	0.9428	0.5972	3.5056	1.9604	2.4563	2.08319	0.00037595	0.0167278	up
Unigene0017846	21.2475	13.225	3.1051	44.673	66.7737	47.7609	2.08296	0.00101134	0.0297964	up
Unigene0045018	8.9985	14.191	5.3086	22.6717	54.0346	43.9928	2.08248	0.000177006	0.010163	up
Unigene0000307	1.4851	0.7425	1.1258	4.4242	4.022	5.7489	2.0817	0.0006796	0.0235741	up
Unigene0064094	4.4814	17.2392	8.5232	30.8826	57.2708	39.661	2.07934	0.000448423	0.0184448	up
Unigene0033382	0.616	1.1835	0.6418	3.5035	3.389	3.3995	2.0758	0.000309481	0.0146901	up
Unigene0010931	0.4887	0.7967	0.5256	2.6339	1.9601	3.0333	2.07439	0.000735053	0.0248258	up
Unigene0026833	0.8999	1.318	0.3047	2.8789	2.8158	4.9231	2.0735	0.0024393	0.0493012	up
Unigene0051378	1.7792	11.4561	4.9372	36.221	18.4807	21.7169	2.07217	0.00146112	0.0370796	up
Unigene0025825	0.4436	1.2419	0.4319	3.1929	2.9884	2.7006	2.06857	0.000413425	0.0176887	up
Unigene0051065	25.5464	20.022	10.4958	75.9588	91.7279	67.3461	2.06771	9.30982e-05	0.00649307	up
Unigene0003269	0.6775	1.0469	0.403	2.1279	2.9712	3.8054	2.06544	0.000479119	0.0192169	up
Unigene0069052	0.758	2.8029	0.9452	5.7594	7.1374	5.9406	2.06365	0.00213679	0.0458194	up
Unigene0027565	0.465	0.8782	0.7916	3.8923	2.5711	2.4586	2.06327	0.00138464	0.0361626	up
Unigene0041902	0.6648	2.2619	1.7241	7.1332	5.1574	7.1136	2.06082	0.00180424	0.0419302	up
Unigene0029542	0.4617	0.3527	0.3838	2.1079	1.4654	1.4241	2.06031	0.00123192	0.0338625	up
Unigene0036425	0.8856	0.5765	0.9938	3.6077	3.2791	3.3447	2.05869	0.00062109	0.0223325	up
Unigene0006900	1.0438	0.9532	1.0155	2.2757	4.8043	5.4651	2.05809	0.0002453	0.0126032	up
Unigene0004053	0.9518	2.4391	1.0145	6.9607	6.1246	5.2199	2.05491	0.000140572	0.00868979	up
Unigene0035097	0.5424	2.3865	0.9416	3.1201	6.1687	6.7921	2.05476	0.00100303	0.0296246	up
Unigene0046159	0.8338	0.8932	1.1406	2.8102	4.1331	4.9484	2.05204	0.00225707	0.0473379	up
Unigene0001644	2.9965	3.3344	1.589	7.3904	11.044	14.398	2.05157	0.000144767	0.00889868	up
Unigene0043640	0.7524	1.7857	1.1312	6.5764	4.3553	4.2778	2.0514	0.000109514	0.00726522	up
Unigene0052913	2.1012	3.189	1.9163	8.9425	11.2416	9.6362	2.04892	0.000617026	0.0222756	up
Unigene0037409	0.7312	1.8675	0.9133	5.8986	4.9776	3.638	2.0471	0.000381407	0.0168764	up
Unigene0016739	1.0998	0.7844	0.351	2.4697	3.5071	3.2364	2.0433	0.000354554	0.0160706	up
Unigene0039668	0.7852	0.444	0.4475	2.4669	2.5157	1.9275	2.04308	0.00168137	0.0402957	up
Unigene0016198	0.6344	0.5074	0.6885	2.4149	2.8133	2.3	2.04022	0.00096802	0.0290052	up
Unigene0046188	11.5134	5.2033	2.1802	20.653	34.1324	22.6505	2.03485	0.0012678	0.0344138	up
Unigene0043790	1.484	1.8653	0.9434	4.1239	8.132	5.3198	2.03362	0.000460658	0.0188063	up
Unigene0038593	3.1863	4.5085	2.3988	11.5396	11.7028	18.0737	2.03326	0.000354942	0.0160706	up
Unigene0035741	5.0718	5.7038	3.2973	16.2534	18.9109	22.4233	2.03284	3.46691e-05	0.00330001	up
Unigene0041154	0.6332	1.4682	0.703	4.2275	2.9126	4.3151	2.03024	0.000410433	0.0176016	up
Unigene0044666	1.197	2.1084	1.5356	7.0405	7.0273	5.6996	2.02975	7.93322e-05	0.00584566	up
Unigene0035130	1.0472	0.6159	0.2949	2.184	3.406	2.4039	2.02952	0.00197371	0.0440548	up
Unigene0020889	1.9923	2.9881	2.2258	9.6662	11.016	8.7281	2.02901	0.00171509	0.0406776	up
Unigene0011322	1.2285	1.3143	0.6657	3.8693	5.6606	3.5628	2.02879	0.000269731	0.0134622	up
Unigene0005271	13.504	13.82	6.2978	42.6791	35.8984	58.5897	2.02847	7.89856e-05	0.0058381	up
Unigene0040231	1.0164	1.5093	1.0711	4.1061	4.9297	5.6301	2.02768	8.29731e-05	0.00603572	up
Unigene0023443	1.0996	1.262	0.894	2.3396	6.374	4.5604	2.02761	0.000679306	0.0235741	up
Unigene0017765	0.3422	0.7018	0.5881	1.7051	2.2054	2.7437	2.02754	0.00189979	0.043096	up
Unigene0039725	1.5286	3.2521	1.1679	4.7341	10.1847	9.3108	2.02615	0.000981046	0.0292156	up
Unigene0037131	24.1382	80.6385	67.9021	139.423	282.447	280.298	2.02372	0.000264661	0.0132866	up
Unigene0068677	54.97	155.797	145.439	334.985	594.644	513.344	2.01826	0.000140194	0.00868141	up
Unigene0026203	0.6014	1.9864	0.5484	4.2254	3.5627	4.9155	2.01815	0.00191819	0.043292	up
Unigene0033136	0.4463	0.9653	0.2728	2.7794	1.76	2.2736	2.01606	0.00110262	0.0315624	up
Unigene0003521	2.3026	4.2485	2.6513	7.1557	17.4556	12.5725	2.01459	0.000337029	0.0155154	up
Unigene0042471	0.7931	0.713	0.5329	3.1713	2.3845	2.6799	2.01403	0.000674954	0.0235381	up
Unigene0028932	0.8864	0.8655	0.431	2.6805	2.8717	3.2639	2.01389	0.000436826	0.0182201	up
Unigene0051672	6.37	8.6045	5.0468	26.7553	27.7705	26.2618	2.0126	2.41935e-05	0.00253855	up
Unigene0038106	0.4112	1.697	1.172	2.8504	5.1543	5.1918	2.0083	0.00169162	0.040398	up
Unigene0001663	1.1552	4.3525	2.8458	15.4652	8.3742	9.7502	2.00756	0.00141874	0.0365123	up
Unigene0007797	1.471	1.1031	0.8452	4.2351	4.5564	4.9554	2.00733	0.000533722	0.0204513	up
Unigene0009409	4.3112	9.0127	7.8602	36.5284	22.0351	26.5382	2.00621	7.34923e-05	0.00558744	up
Unigene0030513	9.1355	5.7305	1.884	16.2132	29.0156	22.0388	2.00575	0.000846653	0.0269044	up
Unigene0023225	2.1072	4.8398	1.5091	8.0806	12.8268	13.0191	2.00435	0.000591884	0.021667	up
Unigene0043252	4.8271	4.3719	1.7376	12.19	15.8306	15.7536	2.00092	0.000250078	0.0127685	up
Unigene0002346	0.8308	1.9038	1.2139	6.0047	4.4827	5.3067	2.00001	0.000102278	0.00689897	up
Unigene0003148	0.9436	2.5991	1.2237	8.8676	5.1357	5.0291	1.99749	0.000466569	0.0189398	up
Unigene0045351	5.5643	4.8931	0.9503	13.4653	21.044	11.027	1.99701	0.00173922	0.0410156	up
Unigene0051545	0.6095	0.9416	0.4458	2.3965	3.0519	2.5224	1.99696	0.000474208	0.019088	up
Unigene0022122	4.8159	7.7236	4.339	15.1577	23.3155	28.8273	1.99543	0.000198415	0.0109839	up
Unigene0003100	86.9308	68.5455	43.8744	234.623	245.389	313.348	1.99267	4.01408e-05	0.00370296	up
Unigene0001160	1.4726	3.4256	0.963	8.1461	7.0106	8.1263	1.99001	0.000647436	0.0228878	up
Unigene0027691	3.6057	2.9508	2.3122	11.6894	12.4246	11.0888	1.9889	0.000402107	0.0174165	up
Unigene0070418	2.8419	15.9505	6.3756	17.282	41.342	41.1904	1.98766	0.00234264	0.0483274	up
Unigene0008788	2.4256	2.5483	1.6831	5.8196	9.3717	11.1522	1.9845	0.002395	0.0489066	up
Unigene0048391	0.8639	2.1675	1.5971	6.9244	5.5404	5.8511	1.98448	0.000109416	0.00726522	up
Unigene0040244	0.8805	1.3225	0.8155	2.9821	4.8395	4.1221	1.98435	0.000167346	0.00978546	up
Unigene0033175	0.7366	2.0986	1.1756	4.0475	6.6359	5.1687	1.98271	0.000928536	0.0283097	up
Unigene0009623	1.3079	3.1103	1.6946	10.1313	6.6169	7.3929	1.98159	0.000150541	0.00912799	up
Unigene0049951	0.8998	2.3391	3.5613	10.8802	8.9856	6.9593	1.97993	0.00129761	0.0347629	up
Unigene0027472	3.4994	5.2883	3.1313	19.6737	13.8008	13.4822	1.97807	5.35729e-05	0.00450753	up
Unigene0045301	1.5044	1.4291	1.3326	4.5961	4.6728	7.534	1.97772	0.000133895	0.00843694	up
Unigene0071499	18.4926	17.5929	4.9965	38.0805	63.8363	59.8328	1.97718	0.000987636	0.0293146	up
Unigene0003744	1.5892	2.0842	1.1469	6.344	6.655	5.9708	1.97651	0.000106178	0.00709533	up
Unigene0043562	1.7402	4.8568	2.1416	7.6966	13.3085	13.3664	1.97574	0.000501088	0.0197058	up
Unigene0042121	1.7181	2.5905	2.0239	5.169	8.0319	11.6178	1.97058	0.00220926	0.0468079	up
Unigene0045518	3.6513	9.1463	3.9518	20.5323	24.2388	20.7193	1.96717	0.000215966	0.0116104	up
Unigene0029388	0.4625	0.3503	0.4026	1.4627	1.7614	1.5244	1.96604	0.00201283	0.0444221	up
Unigene0042733	0.4666	1.3746	0.5585	2.5187	3.1731	3.6626	1.96279	0.00159623	0.0391185	up
Unigene0038104	0.9976	2.0461	1.041	6.2905	5.1739	4.4245	1.95972	0.000264557	0.0132866	up
Unigene0040185	3.4062	2.2344	2.0242	8.6362	10.9179	10.2368	1.95855	0.000987107	0.0293146	up
Unigene0042085	0.4944	1.7422	0.947	4.2142	4.101	4.0549	1.95813	0.00086686	0.0272512	up
Unigene0006884	19.3957	30.645	12.574	41.7607	98.7459	102.753	1.95793	0.000288287	0.0140847	up
Unigene0029352	2.4274	3.423	2.4586	9.1095	12.5636	10.5781	1.95661	0.00121772	0.0335751	up
Unigene0048977	6.9056	13.5646	6.0708	21.1136	43.0001	38.8901	1.9564	0.000249772	0.0127679	up
Unigene0045924	1.8576	2.0816	0.9655	6.6655	6.2164	6.1341	1.95498	0.000110148	0.0072927	up
Unigene0000576	1.3922	0.9977	0.5777	3.4072	4.9489	3.1128	1.95036	0.00171243	0.0406419	up
Unigene0035449	2.436	2.5	0.8181	5.115	10.1492	6.9622	1.94961	0.000606884	0.0220537	up
Unigene0066307	1.3357	2.7825	1.3794	7.9492	6.8161	6.4691	1.94953	0.000938665	0.0285216	up
Unigene0008807	4.9811	7.6596	2.5295	12.2408	24.1444	22.1301	1.94757	0.000733475	0.0247841	up
Unigene0041300	1.2586	1.8658	0.4438	4.0966	4.7563	4.9082	1.94733	0.00117946	0.0330404	up
Unigene0049801	1.0614	2.626	1.2249	7.8616	4.6849	6.389	1.94662	0.00052108	0.0201339	up
Unigene0041418	1.105	2.4822	0.7901	5.7193	5.7831	5.3483	1.9447	0.000446858	0.0184232	up
Unigene0011412	1.489	2.2559	1.6743	8.715	5.4991	6.6461	1.9446	0.00172259	0.0407618	up
Unigene0019544	0.2828	0.5356	0.2668	1.5629	1.3221	1.2916	1.94437	0.000647697	0.0228878	up
Unigene0071287	4.9457	12.8256	2.074	16.4874	31.521	28.2846	1.94275	0.00232482	0.0482093	up
Unigene0032411	0.9087	1.8368	0.7898	4.6989	3.8379	5.0224	1.93937	0.000296823	0.0143364	up
Unigene0003099	24.5831	21.6771	16.951	66.5216	82.0104	93.8353	1.93894	7.76e-05	0.00576537	up
Unigene0046265	2.2969	2.7575	1.0598	5.3194	7.9601	10.1056	1.93535	0.000392348	0.017193	up
Unigene0023507	3.2541	1.9697	1.0289	5.7698	10.3928	7.7218	1.93352	0.00126597	0.0344032	up
Unigene0040654	2.6584	3.7161	2.582	6.9937	14.8907	12.2594	1.93062	0.000196706	0.0109278	up
Unigene0034904	36.8715	76.2838	54.755	252.123	192.881	194.866	1.93009	5.63218e-05	0.00463025	up
Unigene0046146	1.9243	1.3764	1.2231	7.0005	5.3471	4.888	1.92978	0.000222083	0.0118417	up
Unigene0013462	7.0385	7.7322	4.6387	26.8713	25.8134	21.2263	1.92903	6.17085e-05	0.00494661	up
Unigene0012013	5.1195	5.5598	1.1762	11.8199	18.3336	14.941	1.92739	0.00121825	0.0335766	up
Unigene0032465	0.7098	0.5836	0.4322	2.4125	2.2368	1.9117	1.92682	0.000406387	0.0175279	up
Unigene0051091	6.7749	11.9247	9.6587	34.9452	35.0475	37.7194	1.92534	0.000137413	0.00857574	up
Unigene0007305	4.7715	2.7203	1.2626	7.11	13.3477	12.7853	1.92497	0.0012053	0.033451	up
Unigene0038209	4.2013	11.6136	7.1577	16.4002	43.4871	27.1254	1.92131	0.000769857	0.025462	up
Unigene0010103	1.634	2.8432	1.7258	9.4168	7.8298	6.2257	1.91992	0.000330882	0.015319	up
Unigene0043142	0.8482	0.5783	0.4718	2.4051	2.0013	2.7763	1.91982	0.00238941	0.0488769	up
Unigene0038668	1.0396	1.2705	1.0232	5.1273	5.0153	2.4605	1.91876	0.00193739	0.0436156	up
Unigene0038829	1.2485	1.7338	0.7657	4.8814	4.6765	4.6103	1.91846	0.000275051	0.0136329	up
Unigene0022672	0.8692	1.7201	0.9248	3.8957	4.9654	4.4179	1.91792	0.00061628	0.0222756	up
Unigene0000004	0.6168	1.0781	0.3241	3.2606	2.3937	1.9432	1.91188	0.0024449	0.0493865	up
Unigene0043822	5.8959	10.1986	3.5535	17.747	28.6235	27.4534	1.90971	0.0003279	0.0152715	up
Unigene0046929	7.6697	7.8127	3.0555	22.244	24.9332	22.4637	1.90946	0.000155608	0.00933193	up
Unigene0046277	7.7407	6.9377	6.056	24.2599	31.8569	21.5696	1.90564	6.2609e-05	0.00497063	up
Unigene0004211	2.8279	3.9469	2.9901	16.1708	10.4111	9.986	1.9049	0.000968802	0.0290052	up
Unigene0038352	1.2582	1.6818	0.753	3.0397	5.1468	5.623	1.9028	0.000580365	0.0214854	up
Unigene0005904	149.069	167.41	46.6666	438.231	558.751	360.953	1.90279	0.000460372	0.0188063	up
Unigene0010504	0.7334	0.6234	0.4916	2.6044	1.8125	2.4819	1.90007	0.000986158	0.0293071	up
Unigene0019957	12.7427	3.8905	4.1658	17.5557	36.4152	23.5853	1.89873	0.00141124	0.036407	up
Unigene0047709	2.1348	2.5522	2.148	9.7985	7.8903	7.7898	1.89827	7.00874e-05	0.00543803	up
Unigene0040854	1.8741	2.5864	0.9503	7.0103	6.5594	6.562	1.89556	0.000572241	0.0213309	up
Unigene0050775	2.6951	4.8135	2.7024	15.369	11.96	10.5591	1.89162	0.00015324	0.00922653	up
Unigene0029378	3.1346	3.5377	2.0582	8.7268	12.4924	11.1494	1.89046	0.000480779	0.0192348	up
Unigene0048819	3.9583	5.224	1.8341	12.5914	14.8052	13.416	1.88936	0.000316408	0.0149104	up
Unigene0043812	3.8743	5.0218	2.7781	12.005	17.0444	14.194	1.88916	0.000148466	0.00905777	up
Unigene0050450	0.493	0.4108	0.5136	2.1028	1.1242	2.0171	1.88745	0.00178324	0.041634	up
Unigene0051614	1.3349	1.3567	0.7609	4.1764	5.2514	3.324	1.88499	0.000545389	0.0207873	up
Unigene0039243	0.7729	1.4352	1.0485	5.148	3.2332	3.6445	1.88468	0.000373493	0.0166702	up
Unigene0007589	0.8808	2.4032	0.8683	6.3675	3.5372	5.4268	1.88452	0.0016584	0.0399471	up
Unigene0006149	0.538	0.5559	0.5667	1.7039	2.2949	2.1295	1.88378	0.00215974	0.0462011	up
Unigene0000213	22.4934	45.3645	24.1182	57.842	153.452	128.06	1.88346	0.000417441	0.0177592	up
Unigene0003193	3.4176	2.3329	0.9245	6.9181	10.1808	7.4819	1.88069	0.00116344	0.0327324	up
Unigene0035495	0.8406	1.0697	0.4878	2.6279	3.7123	2.4704	1.87735	0.00131421	0.0350243	up
Unigene0038022	2.5065	3.3839	1.8989	8.3228	9.9621	10.293	1.87533	0.000173488	0.010009	up
Unigene0039076	1.2794	1.227	1.1943	3.8225	5.3935	4.3578	1.87495	0.000718074	0.0244766	up
Unigene0048402	1.1324	2.0517	1.0381	6.9343	4.2761	4.2638	1.8738	0.000303252	0.014529	up
Unigene0034748	1.8598	5.8705	3.0941	15.5801	12.2322	11.8576	1.87376	0.000583084	0.0215068	up
Unigene0045869	18.2179	16.0042	13.7303	36.9216	81.2583	57.2497	1.87122	0.000136318	0.00853715	up
Unigene0007254	1.7238	2.1506	1.2008	3.4961	7.1013	7.9636	1.87074	0.000457999	0.0187404	up
Unigene0009544	2.9549	5.0276	2.7958	8.1935	16.5176	14.7017	1.87053	0.000372182	0.016622	up
Unigene0043164	0.7584	1.3722	0.7089	2.4607	3.6126	4.3044	1.86978	0.00185801	0.042754	up
Unigene0038413	1.6529	2.0972	0.9093	5.8185	5.3519	5.8359	1.86785	0.000379489	0.0168167	up
Unigene0021558	1.866	3.2294	1.3091	8.5935	7.3411	7.4193	1.86651	0.000547501	0.0208119	up
Unigene0049206	5.9331	15.7162	11.2379	48.06	33.1373	38.5552	1.86446	0.000305025	0.0145944	up
Unigene0032205	0.4691	0.6329	0.9805	2.3404	2.609	2.6323	1.8642	0.00249187	0.0499139	up
Unigene0035016	1.8444	2.5075	0.9296	7.0843	5.9975	6.1226	1.86242	0.00103947	0.0304003	up
Unigene0050051	2.2206	5.4277	2.3006	14.3262	9.852	11.9238	1.85947	0.000414801	0.0177066	up
Unigene0038695	0.6846	1.8088	0.9727	4.2	4.4517	3.9226	1.85909	0.000530129	0.0203327	up
Unigene0048413	7.6392	10.9452	8.0766	36.696	28.7713	31.2196	1.85859	6.0971e-05	0.00491673	up
Unigene0046564	2.6657	4.0341	3.2196	7.0411	14.4998	14.4211	1.85815	0.000303627	0.0145372	up
Unigene0005924	0.5955	0.6616	0.5544	1.733	2.268	2.5614	1.85704	0.00148028	0.0373426	up
Unigene0048110	1.7828	5.5436	2.857	13.9281	9.9365	12.8097	1.84855	0.000552613	0.0208742	up
Unigene0037184	2.6702	4.0405	2.2842	7.7904	11.2632	13.3117	1.84727	0.0003683	0.0164999	up
Unigene0049811	1.5038	1.62	0.773	5.1576	4.7413	4.119	1.84691	0.000292046	0.0141814	up
Unigene0037851	3.5661	7.2749	4.3037	21.4392	16.2352	16.7853	1.84638	0.000232353	0.0121545	up
Unigene0046888	1.2725	4.3569	1.5878	9.5109	7.8325	8.5807	1.84478	0.0016794	0.0402957	up
Unigene0011805	5.0067	12.4308	5.1918	32.6923	23.7403	24.7041	1.84216	0.000393102	0.017203	up
Unigene0039045	1.009	2.7161	1.218	6.683	4.4666	6.5659	1.84152	0.00196416	0.0439427	up
Unigene0011520	17.2374	25.6652	10.8992	40.6418	69.0769	82.7816	1.83913	0.000502328	0.0197172	up
Unigene0013916	1.4742	2.0648	1.2015	4.3148	5.8934	6.7525	1.83908	0.00134458	0.0355065	up
Unigene0050412	5.2304	11.622	6.3328	34.484	22.8662	25.5029	1.83735	0.000257545	0.0130629	up
Unigene0004993	6.0367	9.2638	4.175	24.4214	22.9059	22.2292	1.83652	0.000428409	0.0180017	up
Unigene0001420	22.9728	52.856	22.9419	69.6342	147.289	135.797	1.83637	0.000574988	0.0213929	up
Unigene0037003	8.4363	9.2138	2.3582	17.3059	27.3092	26.7853	1.83533	0.00187527	0.0428349	up
Unigene0036640	12.7891	23.1711	13.7386	72.8828	49.3181	54.865	1.833	0.000188286	0.0106404	up
Unigene0044055	13.3266	20.173	14.2978	38.1472	67.1558	64.8012	1.83141	0.000144819	0.00889868	up
Unigene0003724	6.1093	3.0497	1.7769	10.3618	12.5788	15.9357	1.82982	0.00101225	0.029811	up
Unigene0050489	1.0092	2.6656	2.5225	9.3812	4.9476	7.6664	1.82748	0.00126208	0.034352	up
Unigene0052112	6.702	4.3153	4.0841	14.0335	21.6316	17.9023	1.82667	0.000302649	0.0145259	up
Unigene0039972	4.6732	8.0779	3.154	12.3059	20.6172	23.4326	1.82507	0.000766373	0.0253702	up
Unigene0040187	18.6421	20.3151	15.3369	53.1537	66.3093	72.8602	1.82467	6.24207e-05	0.00496117	up
Unigene0010586	3.7195	4.5428	3.7407	8.5982	18.3703	15.5101	1.82334	0.000889382	0.0276444	up
Unigene0034567	0.6293	1.349	0.6802	2.4339	3.1567	3.8154	1.82297	0.000594889	0.0217185	up
Unigene0034281	12.4184	22.9108	14.7744	35.0076	77.3308	64.9023	1.82272	0.0004002	0.0173444	up
Unigene0050952	1.2493	3.6847	1.4168	8.7735	6.8265	6.8459	1.82144	0.000843445	0.0268682	up
Unigene0047009	2.2456	3.1275	1.5616	10.5704	7.3442	6.4819	1.81477	0.000520946	0.0201339	up
Unigene0039764	119.363	79.6644	46.5866	215.982	409.539	237.234	1.81256	0.000461192	0.0188067	up
Unigene0045976	1.6657	1.8088	0.828	4.1056	5.5002	5.4864	1.81056	0.00071348	0.0243956	up
Unigene0011991	17.1807	31.1559	16.9566	45.2709	95.1004	88.0796	1.80688	0.000386073	0.0169886	up
Unigene0049861	0.8197	2.1963	0.6844	5.1339	3.7785	4.0295	1.8063	0.00204241	0.0447447	up
Unigene0018722	3.1081	3.0955	2.2455	8.2221	8.9655	12.3497	1.80567	0.000291411	0.0141602	up
Unigene0037483	1.5951	2.5634	0.8001	4.5197	6.133	6.6785	1.80537	0.00222197	0.0469308	up
Unigene0008297	5.6126	10.8536	6.8663	37.2018	24.1095	20.2176	1.80497	0.000432197	0.0180973	up
Unigene0050964	0.7727	1.468	0.592	3.5596	3.1522	3.1752	1.80336	0.00185013	0.0426136	up
Unigene0001908	3.2109	4.2851	4.9996	19.0403	10.8257	13.7237	1.80257	0.000384306	0.016942	up
Unigene0040826	5.2741	7.7727	5.5123	15.8649	21.4357	27.4258	1.80223	0.000237648	0.0123684	up
Unigene0004372	7.1851	9.0604	6.1386	18.5002	33.4687	26.0797	1.8019	0.000198852	0.0109911	up
Unigene0004673	0.7076	1.3207	0.768	2.8069	3.174	3.7628	1.80095	0.0012319	0.0338625	up
Unigene0047395	25.7792	29.4806	21.4059	46.4723	110.245	109.465	1.79576	0.000305286	0.0145972	up
Unigene0051144	0.5201	0.7534	0.4598	2.2974	1.8488	1.8676	1.79476	0.000830685	0.0266234	up
Unigene0037760	0.591	1.2372	0.9548	2.1905	3.7944	3.6695	1.79455	0.00175185	0.04125	up
Unigene0043935	1.3994	2.7807	1.2241	7.4794	5.6942	5.5699	1.79424	0.000791911	0.0259286	up
Unigene0025843	18.7604	47.7886	28.2863	66.5272	130.457	131.916	1.79416	0.000602418	0.0219025	up
Unigene0001966	10.3291	12.4693	9.0871	41.8147	26.5101	42.1312	1.7925	0.000151092	0.00914323	up
Unigene0039593	7.0852	5.6035	2.5235	17.2555	19.1073	16.3274	1.79231	0.000976134	0.0291177	up
Unigene0044899	1.3771	1.6662	0.8782	5.1649	4.2416	4.1751	1.79218	0.000322384	0.0150733	up
Unigene0003342	3.3111	6.1177	2.4699	13.8736	14.4379	12.8857	1.79174	0.00221542	0.0468594	up
Unigene0047127	1.3653	2.7148	1.4362	8.0157	4.7533	6.3283	1.7916	0.00202162	0.0445257	up
Unigene0011544	34.7089	49.3765	32.1681	93.7739	166.073	142.286	1.7904	0.000202225	0.0111131	up
Unigene0046414	38.4061	78.2108	48.8283	134.614	211.427	225.178	1.78769	0.000258696	0.0130923	up
Unigene0047314	6.6463	8.7614	4.4209	17.2642	25.8752	25.3119	1.7875	0.000235173	0.0122662	up
Unigene0032926	2.388	2.4587	0.971	5.9484	8.2257	5.8478	1.78306	0.00110295	0.0315624	up
Unigene0000037	0.851	1.9788	0.8475	4.9065	3.3777	4.3649	1.78232	0.00089794	0.0277475	up
Unigene0051132	1.9864	3.5062	2.0876	6.2306	10.076	9.7597	1.78188	0.000306115	0.0146271	up
Unigene0049918	2.857	2.4624	1.1878	7.0989	7.5954	7.6519	1.77992	0.000422572	0.0178929	up
Unigene0000708	1.7085	1.8222	1.1998	6.1213	5.0319	5.0845	1.77928	0.00175606	0.0412816	up
Unigene0045694	2.3913	2.5538	1.3304	8.3501	6.4705	6.7161	1.77899	0.00059401	0.0217068	up
Unigene0030450	3.3183	3.7249	1.8786	9.1033	12.728	8.7774	1.77854	0.00044165	0.0183148	up
Unigene0041523	2.0685	1.8009	1.8729	4.2736	7.3729	8.0124	1.77548	0.000473887	0.019088	up
Unigene0034891	0.6535	0.6807	0.6649	2.6001	2.1017	2.1349	1.77395	0.00190902	0.043177	up
Unigene0004924	101.011	389.422	337.939	629.882	1116.61	1085.59	1.77351	0.00147022	0.0371843	up
Unigene0038716	1.1573	2.6281	1.1367	3.8091	6.1298	6.8636	1.77133	0.0010092	0.0297481	up
Unigene0025796	3.539	2.6645	1.1182	6.9969	8.1493	9.8242	1.76997	0.00146912	0.0371786	up
Unigene0024524	11.0331	7.3957	11.7065	24.1054	41.3154	36.827	1.76254	0.000521513	0.0201339	up
Unigene0041924	1.3349	2.1545	1.6692	5.8424	5.0884	6.558	1.76138	0.000367912	0.0164928	up
Unigene0011705	0.9169	2.4501	2.4852	3.7802	8.4557	7.5705	1.75892	0.00242556	0.0492283	up
Unigene0049854	0.7819	1.1944	0.5934	2.1948	3.406	3.092	1.75822	0.000897863	0.0277475	up
Unigene0045420	2.9495	6.5156	2.2962	16.1559	10.6563	12.8822	1.75489	0.000951971	0.0287152	up
Unigene0000326	4.1892	6.0048	2.6267	18.3273	11.5228	13.3918	1.75395	0.000847226	0.0269051	up
Unigene0048978	2.3412	6.6716	4.6344	16.8598	15.5772	13.5886	1.75383	0.000704922	0.0242416	up
Unigene0045842	9.485	21.2234	8.3275	49.9684	47.6339	34.0418	1.75377	0.000745668	0.024989	up
Unigene0049711	1.3352	2.3757	1.5141	6.68	4.8344	6.1042	1.7536	0.000494335	0.0195689	up
Unigene0047486	0.9853	2.9032	1.3104	6.7151	5.39	5.4253	1.75358	0.00171894	0.0407157	up
Unigene0032267	2.3757	2.4821	1.5896	7.1323	6.9754	7.6197	1.75273	0.000488916	0.0194354	up
Unigene0006615	1.1664	1.562	1.0305	4.7476	3.7019	4.2007	1.75078	0.00140905	0.036407	up
Unigene0039131	77.3445	94.4255	38.8659	253.938	266.224	188.288	1.74992	0.000369595	0.0165373	up
Unigene0027310	0.9622	0.717	0.8302	3.4784	2.5422	2.4107	1.74841	0.000572297	0.0213309	up
Unigene0062717	17.9049	18.5606	10.5587	44.6579	57.789	55.3354	1.74646	0.000378186	0.0167961	up
Unigene0006102	2.9257	6.1326	2.262	14.7351	12.2543	10.9932	1.74643	0.00085308	0.0270027	up
Unigene0066274	903.106	360.404	283.677	1324.66	2375.55	1478.8	1.74303	0.00141035	0.036407	up
Unigene0049020	1.9661	3.0805	2.0115	3.763	9.7848	10.0529	1.74148	0.00173741	0.0410042	up
Unigene0045153	0.8341	1.3708	1.2943	3.9285	3.8239	3.9203	1.73804	0.00205614	0.0449132	up
Unigene0029773	0.4159	0.2868	0.3891	1.2845	0.971	1.3865	1.73802	0.00204656	0.0447946	up
Unigene0047016	0.7694	1.9232	1.1432	5.7182	3.862	3.1863	1.73476	0.00201797	0.0444671	up
Unigene0045916	1.1226	1.533	1.6547	6.8954	3.2724	4.1689	1.73385	0.00145167	0.036985	up
Unigene0049701	1.12	3.0307	1.047	6.7477	4.7484	5.7687	1.73189	0.0020912	0.0453158	up
Unigene0022536	1.0202	1.4434	0.9922	4.0286	3.7146	3.7085	1.72847	0.000592494	0.021667	up
Unigene0046952	18.7037	33.3494	14.0154	86.3379	65.0331	67.4598	1.72778	0.000480802	0.0192348	up
Unigene0051284	0.6721	1.37	0.6034	3.4553	2.7119	2.5835	1.72586	0.00233868	0.0483274	up
Unigene0043522	1.3232	2.7109	1.2954	6.4204	5.4262	5.7547	1.72361	0.000712341	0.0243876	up
Unigene0036619	3.4687	7.3969	3.8425	18.1779	12.2256	18.1681	1.7235	0.000942882	0.0285888	up
Unigene0041738	2.5002	4.4544	1.7747	12.0196	8.6512	8.1489	1.72312	0.00112975	0.0320863	up
Unigene0048547	1.2625	3.3199	1.8841	7.7892	7.2159	6.3411	1.72292	0.00137249	0.0359371	up
Unigene0041252	86.3678	87.8385	31.5049	178.45	252.798	247.24	1.7217	0.000794471	0.025965	up
Unigene0033772	3.5386	2.9832	1.7109	9.0561	10.2177	7.8771	1.72156	0.00091872	0.02813	up
Unigene0002836	4.0292	2.3455	1.8933	7.3453	9.8559	10.0659	1.72155	0.000612575	0.0222155	up
Unigene0003913	11.5332	42.6808	26.5294	121.236	68.3683	76.2246	1.71908	0.00168607	0.0403634	up
Unigene0046615	1.7967	3.6946	1.3959	5.2975	9.0144	8.3526	1.71844	0.00132748	0.0352471	up
Unigene0042140	2.2599	3.7807	1.9079	10.8652	7.4733	7.8166	1.71834	0.000617021	0.0222756	up
Unigene0026697	8.342	14.6472	9.9927	23.533	43.0867	41.9014	1.71823	0.000538639	0.0205896	up
Unigene0041930	4.8528	3.7884	4.0699	11.5113	13.6172	16.6906	1.71807	0.000273797	0.0135801	up
Unigene0035494	3.8873	3.6776	2.1403	10.7114	12.7	8.5138	1.71787	0.000670139	0.0234043	up
Unigene0047059	3.0296	7.5116	2.8859	17.3117	13.7436	13.1032	1.71754	0.00094407	0.0285888	up
Unigene0028616	0.5211	0.4587	0.328	1.1505	1.7455	1.4026	1.71672	0.00208102	0.0452405	up
Unigene0044149	1.01	2.653	1.4585	5.8698	4.9253	6.0306	1.71603	0.00121698	0.0335751	up
Unigene0041030	1.1329	1.5104	1.3018	5.3637	3.2983	4.2957	1.71568	0.00209281	0.0453296	up
Unigene0036788	1.4162	1.7259	0.9533	5.1776	3.7261	4.5262	1.71337	0.000748269	0.0250132	up
Unigene0049141	6.8052	13.3755	5.1366	16.1948	32.4415	34.2959	1.71181	0.00133265	0.0352949	up
Unigene0048299	3.1367	6.684	2.6791	16.0776	12.2298	12.5871	1.71	0.000935891	0.0284855	up
Unigene0062122	1.6905	2.0346	2.3233	3.9057	5.9215	9.9491	1.70915	0.00235385	0.0484335	up
Unigene0010539	0.852	1.1593	0.4451	3.1813	2.5211	2.3287	1.70905	0.00149771	0.0376369	up
Unigene0042704	1.0926	0.8291	0.9809	3.0271	3.1208	3.3306	1.70731	0.0021384	0.0458266	up
Unigene0038960	175.875	159.879	118.57	488.807	538.761	454.479	1.7058	0.000148814	0.00906652	up
Unigene0040908	0.7211	0.698	0.5813	2.3593	2.2254	1.9257	1.70246	0.000858096	0.0270832	up
Unigene0044553	1.9238	1.9236	1.2063	5.561	5.2568	5.5843	1.69847	0.00197857	0.044059	up
Unigene0071194	1.2099	2.0922	1.4431	4.7237	4.7895	5.8764	1.69741	0.00087522	0.0274299	up
Unigene0049472	9.302	18.3566	9.9794	51.5687	32.2444	37.8743	1.69292	0.000638375	0.0226925	up
Unigene0011482	3.4589	8.3806	5.2659	23.8371	14.7615	16.6395	1.69121	0.00126884	0.0344161	up
Unigene0048905	10.2073	9.6303	6.2461	21.1772	27.0011	36.0435	1.69105	0.000576248	0.0214034	up
Unigene0003970	3.6633	3.8759	1.7948	8.5441	10.0367	11.5317	1.6898	0.00105865	0.0308181	up
Unigene0041909	1.1411	1.7041	1.5965	3.283	5.7318	5.2947	1.68779	0.00136846	0.035897	up
Unigene0043560	1.7304	1.8617	1.1639	4.316	5.0106	5.9542	1.6839	0.000550424	0.020844	up
Unigene0014779	8.9774	13.8484	8.854	25.9209	40.1131	35.644	1.68237	0.000495577	0.0195781	up
Unigene0000065	0.9033	1.4373	0.4724	3.253	2.9241	2.8487	1.68195	0.00178424	0.0416438	up
Unigene0045462	4.3225	10.1667	4.7797	27.3564	16.9846	17.4118	1.68023	0.00104607	0.0305438	up
Unigene0004543	3.443	2.554	3.3507	6.3132	13.0774	10.5614	1.67997	0.00245661	0.0495534	up
Unigene0045313	5.1704	9.6676	5.7631	27.2495	15.0986	23.6002	1.67861	0.000821349	0.0264817	up
Unigene0061782	19.3864	28.5514	11.4456	42.026	76.1944	71.5028	1.67576	0.00123397	0.0339059	up
Unigene0032092	1.9885	1.4346	1.374	4.3055	5.7056	5.2753	1.67201	0.00208869	0.0453024	up
Unigene0003494	6.2547	5.4608	5.1105	15.9971	18.7534	18.8495	1.67154	0.000378981	0.0168152	up
Unigene0014390	1.3282	0.8829	1.2624	3.4733	3.1324	4.4527	1.67068	0.00180746	0.0419539	up
Unigene0039953	0.8705	1.3057	0.6451	2.7152	3.2365	3.02	1.66902	0.00106132	0.0308635	up
Unigene0032560	4.5444	6.4865	3.5084	12.6451	17.5234	16.0558	1.66869	0.000622805	0.0223493	up
Unigene0043240	1.1194	1.1756	1.0279	2.6368	2.998	4.9228	1.66777	0.00242246	0.0492104	up
Unigene0035011	3.2673	6.0426	3.1055	15.8908	11.3532	12.1591	1.66618	0.000891469	0.0276724	up
Unigene0050136	2.8077	4.2938	2.29	12.0969	8.896	8.7389	1.66258	0.000571941	0.0213309	up
Unigene0045360	2.6633	4.6508	2.9592	12.3113	10.332	9.8758	1.66239	0.000672296	0.0234568	up
Unigene0011192	1.4927	1.4563	0.671	4.6467	3.5021	3.2969	1.66074	0.00188203	0.0429283	up
Unigene0028636	10.2379	14.7263	9.4935	22.5967	43.0331	43.202	1.6592	0.00123072	0.0338554	up
Unigene0018114	15.6208	15.882	11.2075	38.9115	48.5762	47.3589	1.65866	0.00061375	0.0222357	up
Unigene0007320	1.4997	1.588	0.9059	4.1562	4.5833	3.8625	1.65789	0.00110049	0.0315425	up
Unigene0041697	7.23	16.1607	10.6051	41.1369	34.2277	31.6574	1.65448	0.00084007	0.0268204	up
Unigene0010159	29.0435	37.1716	20.8488	92.5982	92.8314	88.393	1.65309	0.000346854	0.0158403	up
Unigene0034731	3.2613	2.7951	2.082	9.191	9.6211	6.7333	1.65025	0.00179939	0.0418613	up
Unigene0039416	2.6316	5.8656	2.3494	11.6412	11.1777	11.2059	1.64934	0.00178707	0.0416757	up
Unigene0045915	2.7995	2.9111	1.8463	7.4385	7.1863	9.0526	1.64764	0.00122722	0.0337834	up
Unigene0013005	4.0886	5.3153	3.444	16.1072	10.9576	13.1681	1.64684	0.000760444	0.0252321	up
Unigene0043998	2.5031	4.677	1.831	10.4794	8.9712	8.7372	1.6453	0.00196645	0.0439527	up
Unigene0049405	5.7061	7.3567	6.6867	12.5399	25.8553	23.3658	1.64488	0.000671679	0.0234467	up
Unigene0044523	1.1952	2.0087	0.8244	3.9288	4.089	4.5598	1.64261	0.00194386	0.0436707	up
Unigene0006940	1.3	2.3663	1.3899	5.5216	5.2022	5.0528	1.64166	0.00132647	0.0352335	up
Unigene0047726	12.267	25.9573	19.5482	67.3264	57.2555	55.5855	1.64088	0.000550868	0.020844	up
Unigene0049697	1.9093	1.8525	1.2649	5.0667	5.9846	4.6104	1.63956	0.000580468	0.0214854	up
Unigene0046593	2.7082	3.183	3.401	5.5858	11.9188	11.4233	1.63837	0.00133273	0.0352949	up
Unigene0037628	6.1778	9.2888	4.0968	11.448	26.5369	22.8887	1.63766	0.00182061	0.0421501	up
Unigene0012382	0.8803	1.4107	1.3105	4.2244	3.5821	3.3888	1.63622	0.00248917	0.0498877	up
Unigene0037639	1.264	1.7582	0.6833	4.6388	3.3215	3.5573	1.6361	0.00247446	0.0497456	up
Unigene0046616	3.3847	4.6497	1.825	10.6084	10.2352	9.7429	1.63332	0.0017219	0.0407587	up
Unigene0042038	3.4836	3.6081	1.8966	9.7642	9.3134	8.767	1.63128	0.00114479	0.0323982	up
Unigene0004504	5.8077	5.6577	2.7262	9.8133	18.0107	16.1066	1.63019	0.00169455	0.040398	up
Unigene0058426	28.9598	39.9219	30.4826	61.7625	104.304	140.06	1.62333	0.0010903	0.031363	up
Unigene0031669	3.2656	4.8619	3.4299	12.5399	12.0305	10.9366	1.61929	0.000967114	0.0290052	up
Unigene0009152	11.9919	28.8012	18.9515	62.6589	54.5667	66.2834	1.61897	0.00126313	0.034352	up
Unigene0005312	6.4684	6.7768	3.6004	19.0111	17.0782	15.584	1.61705	0.000897341	0.0277475	up
Unigene0048768	1.6186	2.1276	1.4141	5.5461	5.2196	5.0589	1.61664	0.00119476	0.0333205	up
Unigene0014730	1.0192	1.5149	0.894	4.0317	3.0464	3.4194	1.61456	0.00153966	0.0383287	up
Unigene0012531	3.1743	3.5267	1.9434	9.9668	7.1073	9.3752	1.61339	0.00139263	0.0362133	up
Unigene0046239	3.2076	4.1969	2.3376	10.8981	8.9452	9.9619	1.61326	0.000540604	0.0206445	up
Unigene0019621	47.6357	41.2177	35.6895	124.24	137.285	119.477	1.61316	0.000351243	0.015965	up
Unigene0037890	3.2031	3.8685	3.4464	6.8793	13.7373	11.5536	1.61286	0.00239797	0.0489066	up
Unigene0040976	2.1879	2.4074	1.5452	6.3102	6.7164	5.7467	1.61225	0.000753447	0.0251305	up
Unigene0003639	4.5766	5.3287	2.1231	13.3426	11.651	11.7719	1.61191	0.00158567	0.0390006	up
Unigene0047355	29.9492	73.93	48.4667	204.091	124.453	136.646	1.61047	0.00120862	0.0335042	up
Unigene0005855	1.0734	0.8399	1.0133	3.0674	3.3457	2.5015	1.60694	0.00248211	0.0498569	up
Unigene0010224	4.7778	12.2675	6.0368	27.8186	20.892	21.5234	1.6054	0.00161365	0.0393175	up
Unigene0048583	2.0548	4.3696	2.8937	5.3689	11.2844	11.6515	1.60294	0.00247702	0.0497696	up
Unigene0043055	85.199	53.4838	39.6737	145.41	213.675	182.474	1.60235	0.000830931	0.0266234	up
Unigene0040451	18.9647	28.6887	23.2594	96.6549	56.406	62.1427	1.60158	0.000718374	0.0244766	up
Unigene0046108	6.2013	5.6862	3.57	13.8522	18.9997	14.0238	1.60053	0.000708777	0.0242957	up
Unigene0009668	1.6916	3.45	1.8665	8.4298	6.445	6.3333	1.59752	0.00138723	0.0361626	up
Unigene0042592	55.9607	55.312	40.1913	124.775	191.57	141.458	1.59575	0.00074932	0.0250366	up
Unigene0018164	3.8096	8.1746	4.3074	13.4009	16.6059	19.2014	1.59477	0.00145723	0.0370475	up
Unigene0045147	4.482	5.0159	2.8442	14.1473	10.8249	12.2992	1.59448	0.000975661	0.0291157	up
Unigene0020737	3.3264	3.496	2.6545	9.3981	8.6439	10.5681	1.59404	0.000916485	0.0281089	up
Unigene0034357	1.7709	3.1718	1.4924	6.1681	6.3452	6.9131	1.59398	0.00231561	0.04806	up
Unigene0042548	36.7021	36.6169	14.8655	83.832	109.892	72.4242	1.59363	0.00177637	0.0415007	up
Unigene0011004	1.6619	1.7617	1.0123	3.8143	6.0506	3.4688	1.58778	0.00229043	0.0477087	up
Unigene0045097	3.1954	2.7682	1.6625	6.5072	8.0299	8.3787	1.58733	0.00161082	0.039296	up
Unigene0049171	11.9305	23.9595	14.9452	61.0116	43.3775	48.3067	1.58676	0.000909952	0.0279928	up
Unigene0035518	2.1612	1.5703	1.5315	4.1344	5.7799	5.8637	1.58396	0.0021818	0.0464651	up
Unigene0029559	6.1689	8.4446	3.5585	19.8191	17.0501	17.427	1.57913	0.00165866	0.0399471	up
Unigene0046415	2.737	3.9649	2.2155	8.7119	7.9678	9.9627	1.57903	0.00103704	0.030354	up
Unigene0039256	6.4738	4.2504	3.0771	13.2506	17.0123	10.9338	1.57772	0.00134516	0.0355065	up
Unigene0017704	14.5995	20.7966	17.3065	51.1616	31.531	74.5396	1.57695	0.0020047	0.0443382	up
Unigene0023266	2.9681	2.9829	2.0612	7.2483	8.0731	8.4202	1.56715	0.00175827	0.0412885	up
Unigene0032776	0.9106	1.1732	0.7401	2.5893	3.0398	2.7384	1.56711	0.00198807	0.0441215	up
Unigene0044952	1.8483	2.2123	1.2525	4.8686	4.8666	5.9887	1.56533	0.00136232	0.0358146	up
Unigene0036719	3.5963	3.5414	3.0864	10.0936	9.4024	10.7585	1.56518	0.000601675	0.0218977	up
Unigene0002594	1.2197	1.3756	0.8996	2.9412	3.0082	4.3878	1.56452	0.00159861	0.0391311	up
Unigene0040720	2.3409	4.5124	3.5245	12.032	8.8891	9.7606	1.56388	0.00169333	0.040398	up
Unigene0046636	6.2904	6.928	3.3117	13.3922	18.4977	16.927	1.56229	0.00168989	0.040398	up
Unigene0040640	2.5343	2.6877	1.6445	6.6436	6.7272	6.9031	1.56198	0.00144612	0.0369221	up
Unigene0049576	3.8212	4.279	2.602	10.2645	10.8302	10.4839	1.56104	0.000707948	0.0242875	up
Unigene0025127	1.2499	1.3721	0.9183	2.8481	3.7192	3.8588	1.55826	0.0020446	0.0447653	up
Unigene0035683	4.5813	4.8382	3.5229	11.334	13.0677	13.6011	1.554	0.000746302	0.024994	up
Unigene0042357	4.0657	2.6931	1.873	7.652	9.2157	8.4768	1.55394	0.00205098	0.0448764	up
Unigene0040529	2.3771	2.4035	1.6656	6.538	5.7288	6.6457	1.55282	0.00164871	0.0398411	up
Unigene0012566	33.5202	24.7318	16.1756	62.6868	68.3983	86.2315	1.54589	0.00125026	0.0341834	up
Unigene0048883	4.5502	4.6204	2.8064	10.4484	12.2905	12.175	1.54353	0.00110042	0.0315425	up
Unigene0007363	1.5571	1.63	1.3522	5.2951	4.1361	3.8002	1.54342	0.00124273	0.0340814	up
Unigene0029739	2.9174	5.9116	3.8493	14.6357	11.7422	10.5549	1.54254	0.00205253	0.0448764	up
Unigene0036571	5.2197	7.99	4.528	16.9794	16.6156	18.0299	1.54125	0.00127741	0.034466	up
Unigene0022704	3.0007	3.4281	2.4699	7.6674	9.7591	8.4675	1.54095	0.00164027	0.0396906	up
Unigene0053755	46.2196	54.8258	33.3343	80.7991	163.149	146.662	1.53941	0.00160938	0.0392741	up
Unigene0039191	2.9876	4.3219	2.5718	9.7676	8.9317	10.0192	1.53921	0.00151003	0.0378801	up
Unigene0013705	9.3891	8.6724	9.0549	26.6811	23.9743	27.9456	1.53538	0.00080889	0.026245	up
Unigene0040802	7.4647	5.7888	5.1311	14.6293	16.0755	22.5536	1.53451	0.00209085	0.0453158	up
Unigene0019061	12.1346	10.5374	8.4362	30.0803	31.2188	28.8176	1.5345	0.000774476	0.0255795	up
Unigene0041131	3.0125	4.6485	3.3612	12.7827	9.1834	9.9237	1.53268	0.00239757	0.0489066	up
Unigene0010862	2.0579	1.9326	1.0751	5.2147	4.3156	5.1183	1.53196	0.00182381	0.0421696	up
Unigene0041512	14.0056	11.1698	8.0786	26.7936	30.1692	39.0114	1.52912	0.00142379	0.0365789	up
Unigene0010167	1.4358	1.9892	1.3528	5.2665	3.8066	4.704	1.52785	0.00146839	0.0371786	up
Unigene0028413	4.4665	4.7801	3.3463	11.0659	12.7738	12.4116	1.52542	0.00121738	0.0335751	up
Unigene0037188	35.6953	47.8683	27.3245	111.081	104.759	103.145	1.52438	0.000943895	0.0285888	up
Unigene0047166	698.889	406.457	407.718	1097.56	1786.23	1465.73	1.52338	0.0012584	0.0342882	up
Unigene0010667	4.5943	4.1022	2.1436	8.9821	12.7821	9.3789	1.52253	0.00191269	0.0432086	up
Unigene0040779	19.4793	23.7761	12.527	45.4449	50.8939	63.8567	1.52195	0.00139931	0.0363081	up
Unigene0040097	3.1894	4.6926	2.4099	7.356	12.0459	10.0916	1.51889	0.00203149	0.0446282	up
Unigene0008768	38.4521	70.4519	42.4486	108.633	166.529	158.343	1.51814	0.00139601	0.0362751	up
Unigene0048728	26.1086	26.3784	14.7937	55.3148	81.7977	55.4268	1.51689	0.00154153	0.0383486	up
Unigene0029073	4.3127	3.8692	2.834	10.2576	10.2423	10.975	1.51461	0.00106708	0.0309555	up
Unigene0009077	2.7882	2.4847	1.6301	7.1427	5.7037	6.8587	1.51327	0.00248277	0.0498569	up
Unigene0049031	5.0104	4.6093	2.691	8.9927	13.9099	12.2377	1.51321	0.00212091	0.0456288	up
Unigene0027470	4.1882	7.6707	5.9399	18.6547	15.5297	16.4755	1.50906	0.0018999	0.043096	up
Unigene0023400	18.1204	22.9334	18.3613	34.8746	66.8051	67.3772	1.50861	0.00151807	0.0380419	up
Unigene0051049	4.4622	6.988	3.9369	16.4424	13.4872	13.6017	1.50033	0.00119524	0.0333205	up
Unigene0036128	2.1783	3.2836	2.2439	7.4752	7.0138	7.2694	1.49756	0.0017112	0.040627	up
Unigene0012333	1.674	1.7637	1.8437	3.4133	5.1342	6.3535	1.49642	0.00216224	0.046213	up
Unigene0005274	11.6213	13.5986	11.8642	37.4781	33.3617	33.7576	1.49597	0.00094029	0.0285347	up
Unigene0050602	4.2271	3.8566	3.5761	9.254	15.3743	8.1439	1.49093	0.00242952	0.0492283	up
Unigene0044795	10.4949	13.107	8.3455	29.7019	26.8342	32.8022	1.48358	0.00106085	0.0308622	up
Unigene0045669	1.0815	1.8924	1.0973	3.6408	3.6524	4.0805	1.48218	0.00246617	0.0496624	up
Unigene0046302	58.3105	46.9363	26.7511	96.8911	133.301	137.082	1.47634	0.00233661	0.0483274	up
Unigene0011599	24.5269	55.993	33.717	125.61	93.0743	98.7862	1.47459	0.00217439	0.0463399	up
Unigene0048885	3.8991	6.349	4.1566	16.1511	10.9893	12.8654	1.47367	0.00198018	0.0440717	up
Unigene0034275	6.4492	8.8865	6.6949	17.081	23.8883	20.1918	1.47311	0.00161667	0.0393585	up
Unigene0036111	7.7935	13.8712	8.7884	32.562	24.9548	26.965	1.47205	0.00176384	0.0413426	up
Unigene0046426	2.623	3.5606	2.1312	8.5513	7.233	7.2047	1.46719	0.00226506	0.0474361	up
Unigene0030396	1.853	2.218	1.3789	5.0104	5.0346	5.0154	1.46646	0.00223178	0.0470037	up
Unigene0005291	4.7634	7.0332	5.7424	16.7367	15.5882	16.0999	1.46518	0.00126285	0.034352	up
Unigene0043832	60.4158	142.274	111.913	334.731	263.393	268.731	1.46225	0.00233473	0.0483274	up
Unigene0049003	42.9005	39.2823	27.8393	105.695	94.2951	103.03	1.46162	0.00231778	0.0480911	up
Unigene0032201	7.2112	10.8683	5.9131	25.7048	20.9998	19.0246	1.45394	0.00233106	0.0482968	up
Unigene0049962	90.8711	162.5	106.291	254.81	379.005	351.296	1.45365	0.00184738	0.0425759	up
Unigene0020574	7.1653	7.883	4.8203	17.9924	17.604	18.5157	1.44546	0.0016549	0.0398965	up
Unigene0039846	3.5639	3.2639	2.6817	7.1214	9.094	9.5795	1.43964	0.00234191	0.0483274	up
Unigene0062196	395.756	321.396	252.789	718.384	746.467	1162.03	1.43738	0.00193639	0.0436156	up
Unigene0027429	5.7767	4.7737	3.8111	11.6414	14.3767	12.6582	1.42924	0.00217169	0.0463399	up
Unigene0046942	2.6083	3.2506	2.1289	6.0828	7.8404	7.5668	1.4278	0.00220413	0.0467576	up
Unigene0004904	91.3943	171.274	130.321	388.797	297.741	369.682	1.42635	0.00210797	0.0454365	up
Unigene0002662	32.1767	24.8142	25.7992	63.7429	89.2279	68.0026	1.41634	0.00187014	0.0428194	up
Unigene0047482	8.5054	13.8104	13.908	37.9743	26.6887	31.7424	1.41218	0.00239097	0.0488769	up
Unigene0012491	50.8507	57.0483	43.0639	136.433	127.364	137.956	1.41211	0.00131931	0.0351342	up
Unigene0009069	37.1844	43.8709	47.395	128.086	92.6476	110.168	1.36519	0.00210533	0.0454024	up
Unigene0001659	32.1525	15.7387	33.1581	8.1714	9.5068	10.3855	-1.53009	0.00185904	0.0427639	down
Unigene0067770	75.2298	33.1439	71.6755	17.4898	21.601	23.1976	-1.53136	0.00200229	0.0443005	down
Unigene0006127	26.9172	15.4461	30.1527	7.091	7.3615	10.611	-1.53271	0.00195532	0.0438261	down
Unigene0055788	47.7013	24.0019	47.9501	12.0715	13.6034	15.4481	-1.54084	0.00222447	0.0469422	down
Unigene0069950	9.9879	7.6566	15.6219	3.2387	4.119	3.9367	-1.55846	0.00198713	0.0441215	down
Unigene0041504	54.8428	37.5517	83.2008	19.666	20.9374	18.9791	-1.55929	0.00135084	0.0356142	down
Unigene0009702	18.6756	11.6059	15.5485	4.1095	5.8941	5.5362	-1.56032	0.00154804	0.0384572	down
Unigene0027151	22.3382	9.9378	25.9969	5.95	6.053	7.7486	-1.56086	0.00210893	0.0454365	down
Unigene0044418	19.1458	10.0113	17.3599	4.7712	5.5657	5.4074	-1.56293	0.00180527	0.0419302	down
Unigene0045107	9.2344	5.5163	12.3134	2.8781	2.6722	3.4363	-1.59053	0.00201148	0.044406	down
Unigene0048772	13.6791	7.1299	18.441	3.5846	4.9593	4.4701	-1.59263	0.00236936	0.0486549	down
Unigene0032158	43.2404	19.0265	56.4379	12.8584	11.8045	14.6873	-1.59294	0.00215933	0.0462011	down
Unigene0051101	502.928	599.535	936.371	308.353	139.302	226.105	-1.59744	0.00128525	0.0345866	down
Unigene0065595	67.125	91.4775	134.867	31.9094	24.4231	39.9935	-1.60721	0.00152198	0.0381	down
Unigene0058762	21.6359	14.5629	18.4839	4.4206	5.2127	8.231	-1.61401	0.00204015	0.0447447	down
Unigene0034596	32.2751	13.5516	32.7587	7.9586	8.5998	9.0919	-1.61529	0.0013677	0.0358902	down
Unigene0060865	49.2228	20.5723	56.5401	11.3246	14.618	15.0836	-1.62264	0.00216287	0.046213	down
Unigene0020533	28.3346	15.3996	30.4315	8.7321	7.3925	7.8449	-1.62955	0.00146012	0.0370685	down
Unigene0047740	66.1228	30.3055	92.0799	18.7176	20.0353	22.1077	-1.63105	0.00141075	0.036407	down
Unigene0069658	12.9136	6.5955	17.7594	3.3552	3.8419	4.8152	-1.63344	0.00191804	0.043292	down
Unigene0040548	34.7754	13.7382	39.8873	9.056	9.7437	9.6624	-1.63502	0.00231544	0.04806	down
Unigene0052179	23.2713	9.8168	25.7327	5.8862	6.9012	6.0593	-1.64201	0.0017396	0.0410156	down
Unigene0066842	15.6732	8.6955	19.1884	3.7129	4.5671	5.5747	-1.65253	0.00196603	0.0439527	down
Unigene0026146	18.7518	8.1699	24.6858	5.1754	5.4768	5.7027	-1.65786	0.00196756	0.0439637	down
Unigene0055192	75.4953	31.3865	107.394	18.6641	24.765	24.4307	-1.65884	0.00201119	0.044406	down
Unigene0050126	516.896	308.627	486.044	128.522	177.984	107.09	-1.665	0.000518	0.0200848	down
Unigene0000092	15.8339	6.9947	18.9533	3.4774	4.6371	5.0498	-1.66625	0.00198244	0.0440717	down
Unigene0045467	19.3836	8.4057	20.7906	4.6173	3.969	6.6909	-1.66898	0.00173303	0.0409412	down
Unigene0046387	14.6323	6.7513	19.7588	4.1992	3.9475	4.7713	-1.67124	0.00200238	0.0443005	down
Unigene0004250	38.5854	17.541	48.6517	8.495	11.1816	13.2046	-1.672	0.00129982	0.03477	down
Unigene0011460	87.3962	38.194	88.8478	19.1472	21.1143	26.9713	-1.67332	0.000876671	0.0274437	down
Unigene0053089	31.5996	16.7258	32.7817	7.6678	8.479	9.1677	-1.67986	0.00077619	0.0256125	down
Unigene0029546	8.8186	4.2979	8.97	2.0996	2.394	2.3879	-1.68237	0.00133785	0.0353917	down
Unigene0048889	33.3108	52.2471	77.9093	19.0794	16.7909	14.9857	-1.68451	0.000814211	0.0263938	down
Unigene0049280	32.2268	16.4106	44.6252	8.8867	9.1228	10.9575	-1.68689	0.000803353	0.0261481	down
Unigene0000124	44.7625	24.6381	57.1306	11.3835	14.2215	13.5671	-1.69159	0.000691758	0.0239035	down
Unigene0027738	55.9188	21.6851	64.7355	12.625	13.8819	17.3815	-1.69742	0.00139873	0.0363077	down
Unigene0002623	248.512	180.099	298.27	79.6375	39.8867	104.074	-1.70081	0.000807694	0.0262181	down
Unigene0035342	54.4135	18.5417	64.4957	13.0376	13.4431	15.7495	-1.70257	0.00165419	0.039893	down
Unigene0002755	72.9762	32.4152	76.481	16.4661	19.5385	19.8692	-1.70268	0.000837884	0.0267862	down
Unigene0064316	27.6747	10.729	34.1675	7.0321	5.8902	9.3432	-1.70459	0.00159432	0.039106	down
Unigene0022313	15.8885	8.05	14.2908	4.0113	3.8746	3.8394	-1.70505	0.00100813	0.0297481	down
Unigene0032779	15.5454	8.8593	18.3782	4.4819	3.2161	5.4217	-1.7053	0.00144891	0.0369492	down
Unigene0021647	32.3713	12.6066	26.4247	7.4883	7.5861	6.7274	-1.71153	0.00144668	0.0369232	down
Unigene0002387	221.45	94.8372	277.79	56.5424	57.0178	67.7107	-1.7125	0.000756851	0.0251828	down
Unigene0034445	17.2354	19.3903	20.2835	4.2234	6.7286	6.3997	-1.71358	0.000845437	0.0268958	down
Unigene0042600	11.7254	5.9067	15.4941	3.3338	3.2073	3.5528	-1.71449	0.00125252	0.0342299	down
Unigene0048949	9.1152	4.8026	10.894	2.0231	2.6197	2.9105	-1.71585	0.000843208	0.0268682	down
Unigene0004132	12.6449	5.2682	13.463	2.4627	3.8538	3.2167	-1.71863	0.0022161	0.0468594	down
Unigene0068488	35.7111	14.1576	27.4422	7.8114	6.9747	8.5303	-1.72933	0.00217288	0.0463399	down
Unigene0059680	50.0814	50.2194	72.3995	14.0658	23.4165	14.4997	-1.73219	0.000645986	0.0228499	down
Unigene0004342	6.2287	2.8368	5.6343	1.6399	1.5717	1.2127	-1.73228	0.00195714	0.0438266	down
Unigene0016366	24.0955	17.8953	18.9776	5.7812	6.4725	6.0141	-1.73876	0.00146301	0.0370796	down
Unigene0013640	16.9061	7.8808	18.4914	4.1603	4.6527	4.1525	-1.73897	0.00197778	0.044059	down
Unigene0021230	136.806	59.0455	167.923	31.0094	36.9035	40.9501	-1.74053	0.000701738	0.0241553	down
Unigene0033777	105.553	42.5384	159.012	28.3605	29.44	33.9445	-1.74302	0.00106301	0.0308874	down
Unigene0045807	32.3257	14.1957	36.9124	6.2885	8.5033	10.1188	-1.74387	0.00125326	0.0342299	down
Unigene0062687	13.903	14.8141	21.7476	3.7884	5.3627	5.8549	-1.74974	0.00111634	0.0318493	down
Unigene0019554	21.3696	9.6523	26.7938	4.9778	5.9213	6.2337	-1.7547	0.000690328	0.0238655	down
Unigene0013849	58.3309	25.0106	75.6276	12.3913	14.8263	19.879	-1.75505	0.000971376	0.0290482	down
Unigene0056639	29.3808	12.7814	34.5716	5.5617	7.1247	10.0282	-1.75624	0.00122112	0.0336301	down
Unigene0026289	10.4413	4.6412	13.0958	2.4748	2.6021	3.2573	-1.75747	0.00130213	0.0348189	down
Unigene0027878	13.0043	7.602	16.6872	3.5903	2.9905	4.441	-1.75856	0.000892676	0.0276869	down
Unigene0003136	25.9734	13.1246	40.6396	7.033	6.7046	9.8235	-1.75885	0.00100083	0.0295994	down
Unigene0035255	20.5356	9.4176	26.3502	5.0207	5.293	6.2599	-1.76434	0.000656004	0.0230791	down
Unigene0041485	29.0521	18.7036	35.7762	7.3862	5.8493	11.1339	-1.77726	0.000831317	0.0266237	down
Unigene0003344	15.5653	8.7023	23.0554	4.1683	4.3175	5.2945	-1.77993	0.000511028	0.0199254	down
Unigene0061367	29.7503	10.444	37.058	7.1821	6.8688	8.3974	-1.78297	0.00119606	0.0333205	down
Unigene0051774	18.7994	8.4101	17.5843	4.529	3.0974	5.3541	-1.78695	0.00107233	0.0310177	down
Unigene0012152	11.3588	6.0881	11.0243	2.2588	2.6502	3.3392	-1.78735	0.00243284	0.0492467	down
Unigene0030455	4.4016	4.4987	7.5094	1.5607	1.725	1.4576	-1.79059	0.000968164	0.0290052	down
Unigene0010389	105.583	46.8143	75.4174	23.7181	23.3332	18.6421	-1.79404	0.000298046	0.0143658	down
Unigene0050125	4918.15	1633.44	2693.4	702.881	1127.98	831.354	-1.79605	0.000548204	0.0208119	down
Unigene0038933	3.9746	2.6405	3.8576	1.1455	0.7122	1.1495	-1.80014	0.00144151	0.0368175	down
Unigene0000412	21.9676	12.1415	29.5998	4.8974	6.8842	6.5063	-1.80061	0.00044173	0.0183148	down
Unigene0008998	54.0025	30.239	79.3806	16.0704	15.7601	14.9162	-1.80743	0.000416717	0.0177395	down
Unigene0012313	28.4721	12.989	32.7105	6.4162	6.6042	8.1304	-1.81015	0.000431377	0.0180735	down
Unigene0011699	4.9119	2.993	5.0766	1.1941	0.7692	1.7325	-1.8125	0.0019747	0.0440548	down
Unigene0003797	9.8821	4.6283	17.1071	2.8723	3.5682	2.5443	-1.81517	0.00158846	0.039029	down
Unigene0008203	12.0595	4.7344	14.4585	2.6894	2.9932	3.197	-1.8154	0.00128627	0.0345866	down
Unigene0055455	16.1955	9.8706	18.9061	3.3307	4.6212	4.8234	-1.81568	0.00193301	0.0435854	down
Unigene0021229	45.0157	17.0497	51.1921	8.7572	12.7307	10.5265	-1.82281	0.00143164	0.0366187	down
Unigene0012817	13.8536	10.4528	19.9342	5.5834	3.0466	3.8726	-1.82314	0.00106462	0.0309219	down
Unigene0039128	9.8736	3.8354	13.208	1.7738	3.0075	2.7742	-1.83292	0.00170574	0.0405367	down
Unigene0018545	15.3457	7.6824	21.9488	3.86	3.2993	5.4217	-1.83794	0.000927485	0.0283017	down
Unigene0004598	16.4433	6.9742	18.4494	3.0026	3.7151	4.9895	-1.83841	0.00058378	0.0215068	down
Unigene0049267	46.3306	21.1271	55.9837	9.823	11.8303	12.8467	-1.83916	0.000301685	0.0145023	down
Unigene0037264	81.7028	30.5487	109.359	16.2603	18.6504	26.9247	-1.84152	0.000723062	0.0245479	down
Unigene0025895	4.1404	1.5078	4.1607	0.7236	0.9345	1.0772	-1.84239	0.00218749	0.0465311	down
Unigene0013356	21.9565	7.233	22.8525	3.6073	5.3299	5.4961	-1.85028	0.00135308	0.0356368	down
Unigene0040169	8.2692	4.2231	9.7068	1.5787	2.0093	2.5589	-1.85257	0.0010413	0.0304416	down
Unigene0048354	7.4855	2.9797	9.3062	1.462	1.7504	2.2576	-1.8538	0.000987389	0.0293146	down
Unigene0009819	18.5403	14.6295	37.8848	6.7399	7.1324	5.7821	-1.85408	0.000898513	0.0277475	down
Unigene0033704	4.6681	2.695	5.6676	1.0933	1.3263	1.1837	-1.85452	0.00216194	0.046213	down
Unigene0063758	21.2164	17.2138	40.964	7.6012	4.9758	9.3732	-1.8548	0.000485901	0.019331	down
Unigene0050967	80.0895	31.7523	53.5809	6.9025	26.0607	12.762	-1.8551	0.00196347	0.0439408	down
Unigene0002135	19.0829	8.3739	23.8011	4.8409	4.1061	5.1479	-1.8626	0.000497484	0.0196178	down
Unigene0045235	38.9055	20.5776	46.9589	8.0652	10.6686	10.517	-1.86352	0.000347213	0.0158403	down
Unigene0038681	6.9794	3.9417	7.9418	1.7779	1.5971	1.7963	-1.86695	0.000731069	0.0247458	down
Unigene0033832	5.3822	2.821	8.7516	1.62	1.2735	1.7486	-1.86884	0.00216413	0.0462261	down
Unigene0042909	27.7364	13.3178	14.3887	3.4894	6.4432	5.246	-1.86896	0.000648102	0.0228909	down
Unigene0035289	19.8796	11.4216	47.5921	5.3851	8.4803	7.6896	-1.87188	0.00238213	0.0487709	down
Unigene0026969	14.0317	6.8737	18.9097	3.331	3.9357	3.6042	-1.87284	0.000789165	0.0258505	down
Unigene0042018	10.0954	5.0732	11.1292	1.5815	3.2591	2.3191	-1.87697	0.00217359	0.0463399	down
Unigene0032532	10.9917	6.198	10.9643	2.425	2.4059	2.8272	-1.87828	0.000878749	0.0274686	down
Unigene0054955	17.5328	7.5381	22.4404	4.1138	3.9976	4.7924	-1.88047	0.000468045	0.0189783	down
Unigene0040412	8.9939	3.9969	12.9752	1.7771	1.8209	3.4367	-1.88406	0.00227489	0.0475576	down
Unigene0020492	12.8116	4.9034	14.9197	2.4204	2.5898	3.8099	-1.88754	0.00119984	0.033364	down
Unigene0012457	6.6527	3.5957	10.1873	1.4903	1.8814	2.1483	-1.88835	0.000658549	0.0231573	down
Unigene0012257	9.4005	3.3649	12.6524	2.3296	2.4652	2.0502	-1.89272	0.00179599	0.0418148	down
Unigene0025061	20.0026	7.0654	20.9359	3.6516	4.5082	4.7626	-1.89328	0.000779859	0.0256826	down
Unigene0001214	4.0807	1.5254	4.1289	0.7015	1.0544	0.8642	-1.89356	0.00130894	0.0349358	down
Unigene0041486	6.6866	3.0254	9.4383	1.265	2.0689	1.8193	-1.89383	0.00228451	0.0476672	down
Unigene0072146	11.9829	4.7524	14.2287	2.8566	3.0474	2.4151	-1.89609	0.000797952	0.0260432	down
Unigene0060744	39.0421	14.9176	41.3213	8.8662	6.8766	9.8301	-1.89757	0.000641446	0.0227229	down
Unigene0040744	10.3716	4.5472	14.7519	2.3308	3.1919	2.4387	-1.89794	0.000955236	0.0287814	down
Unigene0038333	12.3529	6.7061	17.1763	3.1734	2.4394	4.0716	-1.90366	0.000741353	0.0249505	down
Unigene0036740	22.7543	9.9344	21.2194	3.79	3.1831	7.4147	-1.90566	0.000821265	0.0264817	down
Unigene0046111	13.0625	6.8466	12.8338	2.8645	3.804	2.0688	-1.90592	0.00159802	0.0391299	down
Unigene0016409	29.9947	9.5265	31.0737	5.3248	6.5456	6.9595	-1.90654	0.00107268	0.0310177	down
Unigene0050311	12.6973	38.6006	70.3735	9.6788	13.4327	9.2911	-1.90881	0.00238066	0.0487613	down
Unigene0027625	116.703	38.3137	136.854	22.5403	23.7542	31.2937	-1.91142	0.000557421	0.0209942	down
Unigene0030625	35.1477	20.337	19.4768	5.2922	6.6961	7.932	-1.91191	0.000223854	0.0118966	down
Unigene0008729	4.7686	3.9438	8.1787	1.5653	1.6565	1.2634	-1.91302	0.0013184	0.035123	down
Unigene0048538	6.0264	2.2072	6.9582	1.2005	1.4572	1.3673	-1.91623	0.00142135	0.0365367	down
Unigene0048254	12.5823	11.2825	13.8124	3.0648	2.973	3.9077	-1.92158	0.00048201	0.0192616	down
Unigene0051367	10.3593	4.0586	13.1586	1.9572	2.031	3.2125	-1.93723	0.000877401	0.0274437	down
Unigene0036248	15.8239	7.3487	25.3059	3.8704	4.0958	4.6896	-1.93755	0.000592161	0.021667	down
Unigene0042130	8.4496	3.1484	10.9675	1.1789	2.249	2.462	-1.9378	0.00127807	0.0344709	down
Unigene0016604	9.1936	2.7747	10.0805	1.8237	1.6542	2.2692	-1.93979	0.000976671	0.0291216	down
Unigene0066918	11.0278	5.4878	18.8228	1.868	3.6944	3.6443	-1.94048	0.00142452	0.0365789	down
Unigene0040099	10.8623	8.2602	13.1706	2.1086	3.0346	3.266	-1.94119	0.000576236	0.0214034	down
Unigene0046502	18.7378	8.5	29.9057	4.4242	4.4471	5.971	-1.94487	0.000414971	0.0177066	down
Unigene0019415	56.2098	22.1443	68.041	9.7415	14.3699	13.8605	-1.94686	0.000377274	0.0167763	down
Unigene0059574	14.0741	18.037	37.295	4.2821	5.5673	8.1464	-1.9474	0.000898883	0.0277475	down
Unigene0044805	435.4	453.382	639.71	69.6193	104.667	220.593	-1.95262	0.000227256	0.0120104	down
Unigene0028517	9.338	3.6378	11.6858	1.5518	2.0271	2.771	-1.95746	0.00119642	0.0333205	down
Unigene0053053	21.7961	8.1666	22.6464	4.0557	4.3331	5.1564	-1.95753	0.000511113	0.0199254	down
Unigene0036878	5.6389	2.4672	9.9553	1.2363	1.6768	1.7267	-1.96078	0.0014272	0.0365875	down
Unigene0022887	4.7008	2.6113	4.5984	0.9298	1.1123	0.9927	-1.97256	0.00241529	0.0491197	down
Unigene0009830	30.37	47.3109	171.165	19.8957	25.6585	17.3545	-1.98392	0.00171645	0.0406835	down
Unigene0021807	6.1454	2.5405	10.315	1.4478	1.6799	1.6672	-1.9865	0.000764342	0.025338	down
Unigene0009823	34.3435	56.2524	197.482	24.2884	31.2669	17.01	-1.98911	0.00186221	0.0427957	down
Unigene0007830	16.6776	7.9557	18.5532	2.4296	4.4601	3.9806	-1.99019	0.00075671	0.0251828	down
Unigene0002634	447.71	1613.58	1030.26	311.078	206.576	260.478	-1.99025	0.000205881	0.0112366	down
Unigene0002334	29.2646	11.3853	37.0329	5.314	6.1523	8.0396	-1.99368	0.00027955	0.0137889	down
Unigene0062769	43.6222	16.9918	45.6595	8.6031	7.987	10.0694	-1.99506	0.000263174	0.0132362	down
Unigene0011336	5.077	2.1353	6.7717	0.9668	1.1867	1.3513	-1.99637	0.00120745	0.0334849	down
Unigene0045804	32.2101	15.5589	55.0989	8.2135	8.2967	9.1998	-2.00039	0.000317981	0.0149406	down
Unigene0026511	9.8507	4.1578	11.3726	2.0027	1.8544	2.4756	-2.00286	0.000289288	0.014124	down
Unigene0039958	29.0021	11.2163	46.5221	6.2048	6.8148	8.5408	-2.00832	0.000429898	0.0180221	down
Unigene0071584	24.9704	8.3722	24.7076	2.7381	4.8188	6.8305	-2.0125	0.000724787	0.0245715	down
Unigene0004127	30.7226	86.4093	131.543	18.6933	28.1612	14.6484	-2.01554	0.000712777	0.0243876	down
Unigene0058455	9.4387	4.8687	12.0155	2.2466	2.0446	2.2067	-2.01827	0.00085328	0.0270027	down
Unigene0052591	13.7462	4.002	18.8553	3.6204	2.9902	2.4186	-2.01931	0.0019443	0.0436707	down
Unigene0034343	4.6188	1.7545	5.4565	0.6157	1.1497	1.1458	-2.02274	0.00160786	0.0392638	down
Unigene0050853	28.3852	51.4219	173.729	21.0292	28.4742	12.8261	-2.0242	0.00209404	0.045336	down
Unigene0023096	9.0582	3.938	11.8799	2.0158	1.5999	2.4989	-2.02443	0.00239591	0.0489066	down
Unigene0048884	6.768	2.5132	9.9799	1.4414	1.681	1.6114	-2.02462	0.0016369	0.0396473	down
Unigene0038151	4.3067	4.3619	5.5107	1.1283	1.0055	1.3461	-2.02667	0.000613483	0.0222357	down
Unigene0003152	9.8207	2.9962	13.7918	1.7007	1.8979	2.9205	-2.02915	0.00188234	0.0429283	down
Unigene0010949	25.814	53.8039	186.205	23.4208	26.6207	15.0198	-2.03059	0.00231499	0.04806	down
Unigene0049871	13.3839	7.4807	19.4123	2.9072	3.5582	3.3698	-2.03393	0.000117327	0.00765505	down
Unigene0066779	18.2998	8.3075	21.1992	2.958	4.1646	4.5185	-2.03798	0.000200726	0.0110561	down
Unigene0052561	22.6678	7.9106	28.7021	4.181	5.1678	5.0861	-2.038	0.000423677	0.0178929	down
Unigene0012328	49.3131	16.9113	61.9395	9.0967	9.9282	12.0836	-2.04261	0.000172594	0.00998245	down
Unigene0030971	8.4875	4.5262	7.3149	1.697	1.293	1.9233	-2.04875	0.00175981	0.0412885	down
Unigene0000360	14.8639	5.7378	17.8927	2.082	3.3404	3.8059	-2.06051	0.00141895	0.0365123	down
Unigene0039077	4.2944	3.8366	8.5851	0.8144	1.6486	1.5383	-2.0627	0.00146362	0.0370796	down
Unigene0026706	11.8707	4.4694	12.8411	2.3207	2.6047	2.059	-2.06283	0.00173244	0.0409407	down
Unigene0004193	7.8885	2.0035	11.2104	1.1667	2.0349	1.8365	-2.06646	0.00189646	0.0430724	down
Unigene0022035	7.2196	5.6815	6.9958	1.6497	1.6973	1.385	-2.07202	0.000579448	0.0214698	down
Unigene0047144	20.1869	9.0198	25.448	3.7437	3.4665	5.7457	-2.07674	0.00147038	0.0371843	down
Unigene0049662	3.2172	14.1782	10.84	2.6302	1.9362	2.1061	-2.08121	0.00234692	0.0483761	down
Unigene0047143	17.8929	6.3502	24.115	2.915	4.2065	4.3049	-2.08139	0.000844961	0.0268958	down
Unigene0064483	11.5957	6.8843	14.1693	2.7242	1.4721	3.5035	-2.08416	0.000913701	0.02806	down
Unigene0037065	15.2776	6.177	24.042	2.6603	3.3381	4.72	-2.08567	0.000386983	0.0170183	down
Unigene0003316	21.101	4.9944	19.5231	2.4458	4.607	3.6497	-2.09167	0.00127493	0.034451	down
Unigene0038698	5.7336	2.7362	8.7765	1.0838	1.4558	1.4961	-2.0954	0.00170202	0.0405019	down
Unigene0037334	13.1686	10.9727	18.8049	3.5475	3.7541	2.7223	-2.09909	0.000774304	0.0255795	down
Unigene0046222	99.6224	567.399	232.347	95.5825	45.7344	68.05	-2.10288	0.000718576	0.0244766	down
Unigene0011514	5.742	2.7533	4.2795	0.8665	1.1461	0.9411	-2.11271	0.00141649	0.03649	down
Unigene0008495	11.7849	4.6723	15.0167	2.0902	2.0109	3.1587	-2.11615	0.00064012	0.0227096	down
Unigene0025117	21.9229	10.1997	23.0134	4.7566	2.6924	5.2238	-2.12126	0.000308656	0.0146774	down
Unigene0013286	31.7813	13.8744	55.6681	7.6313	7.3035	8.3274	-2.12291	0.000201111	0.0110688	down
Unigene0016534	3.3788	1.3091	4.7743	0.4647	0.7468	0.9591	-2.12408	0.00157762	0.0389093	down
Unigene0064587	3.7119	2.0264	4.9369	0.8872	0.7222	0.8379	-2.125	0.00150801	0.0378426	down
Unigene0015569	33.1308	14.511	45.1489	6.9073	6.1592	8.0851	-2.13321	8.3176e-05	0.00603572	down
Unigene0030823	5.8201	2.1758	9.6907	0.9813	1.3845	1.6634	-2.13409	0.00127666	0.0344626	down
Unigene0013369	6.8416	2.8504	11.0799	1.4484	1.3624	1.8999	-2.14062	0.00136079	0.0358007	down
Unigene0009761	4.853	2.8339	7.7295	0.9544	0.9426	1.5925	-2.14337	0.00032976	0.015319	down
Unigene0008597	33.2246	15.7525	38.6161	7.1084	6.0895	6.607	-2.14496	8.43561e-05	0.00609078	down
Unigene0037630	25.8944	11.2535	33.181	5.9109	4.1851	5.7433	-2.15061	0.000139294	0.00865107	down
Unigene0046073	16.4344	61.5762	103.122	7.5621	17.3863	15.8147	-2.15171	0.000920821	0.0281711	down
Unigene0010680	4.6148	2.5116	5.3217	1.152	0.903	0.7455	-2.15217	0.000419302	0.0178083	down
Unigene0017854	49.1906	16.6693	75.1191	8.9494	11.5579	11.1778	-2.1536	0.000227575	0.0120184	down
Unigene0009828	3.5567	4.7418	7.0246	1.3511	1.2041	0.8731	-2.16014	0.00206826	0.0450633	down
Unigene0007230	6.3276	1.9332	9.8464	1.1808	1.5768	1.2878	-2.16221	0.000597604	0.0217959	down
Unigene0011454	10.4654	4.047	14.9957	1.4798	2.1532	2.9262	-2.16952	0.0010286	0.0301932	down
Unigene0071603	14.0061	3.3959	18.8725	2.0659	2.5262	3.4687	-2.16996	0.00147956	0.0373375	down
Unigene0062151	25.8625	9.1153	28.7626	3.3883	4.2278	6.5436	-2.17042	0.000321677	0.0150599	down
Unigene0032030	4.0606	1.887	6.512	0.9368	0.5287	1.2977	-2.17285	0.00206109	0.0449618	down
Unigene0007352	6.402	1.6892	5.492	0.8533	1.3094	0.8463	-2.17447	0.00242633	0.0492283	down
Unigene0067778	8.4938	3.6679	11.7256	1.5371	2.2038	1.5454	-2.17591	0.000956018	0.0287884	down
Unigene0056164	34.4333	10.247	41.769	5.0405	5.8545	8.1278	-2.18412	0.000358798	0.0162057	down
Unigene0034276	3.7024	1.7458	4.7639	0.8952	0.4615	0.8888	-2.18517	0.00106624	0.0309438	down
Unigene0009763	11.3747	4.4083	12.2435	2.7503	1.6791	1.6984	-2.19335	0.00210348	0.0453953	down
Unigene0067084	21.1098	7.1581	29.5532	2.5136	4.6106	5.4997	-2.19544	0.000456484	0.0187104	down
Unigene0062466	9.5403	2.963	8.9282	1.8035	1.101	1.7688	-2.19722	0.00195226	0.0437856	down
Unigene0045695	19.3784	109.753	31.4134	18.8052	4.2889	11.8508	-2.19982	0.00186215	0.0427957	down
Unigene0002255	8.0389	3.0343	11.5142	1.099	1.5701	2.2316	-2.20446	0.00164283	0.039739	down
Unigene0031891	3.6998	1.2694	3.4238	0.4227	0.7368	0.6576	-2.20755	0.00149184	0.0375418	down
Unigene0035290	8.0455	4.7943	11.2843	1.2479	1.6095	2.3572	-2.20985	0.000382302	0.0168926	down
Unigene0039998	4.2595	2.9154	6.1103	0.8111	0.6008	1.4555	-2.212	0.00129469	0.0347411	down
Unigene0032663	6.098	2.4594	8.0438	0.7572	1.414	1.4092	-2.21309	0.000560412	0.0210801	down
Unigene0042283	9.4447	2.794	14.2265	1.3409	2.0811	2.2795	-2.21468	0.00139344	0.0362214	down
Unigene0046072	29.2438	148.339	175.075	15.0423	39.6107	21.1924	-2.21714	0.000720978	0.0245119	down
Unigene0045333	3.4569	1.7451	4.6515	0.7265	0.7047	0.6861	-2.21841	0.000472905	0.0190783	down
Unigene0067991	17.3445	5.9874	26.2101	2.356	4.5902	3.5976	-2.23226	0.000251202	0.0127954	down
Unigene0039442	2.8427	1.6355	4.1589	0.5413	0.6874	0.5964	-2.24257	0.000440681	0.018308	down
Unigene0012999	2.5854	1.1669	2.4644	0.2585	0.4255	0.6238	-2.24901	0.00210267	0.0453953	down
Unigene0002934	6.2106	22.5976	13.4366	2.5387	2.6865	3.6487	-2.25113	0.000408346	0.0175714	down
Unigene0031040	9.1164	3.0111	10.257	1.0017	2.0158	1.675	-2.25407	0.000216239	0.0116164	down
Unigene0001418	21.704	6.2938	17.2436	3.441	2.4276	3.5388	-2.26578	0.000528154	0.0203064	down
Unigene0002003	6.2381	3.6188	4.2849	1.0104	1.2029	0.7157	-2.27149	0.00110671	0.0316447	down
Unigene0058824	4.3784	2.3106	7.0462	0.9921	0.8029	1.0473	-2.27275	0.00186602	0.0428194	down
Unigene0043280	12.9704	55.1185	12.6202	8.4441	1.3288	6.8236	-2.28185	0.00207391	0.045159	down
Unigene0041951	2.1792	8.3573	2.2419	1.1339	0.3555	1.1304	-2.28618	0.00199227	0.0441641	down
Unigene0032715	6.6751	24.111	4.1416	3.8113	0.6354	2.7121	-2.28658	0.00237285	0.0486987	down
Unigene0031958	2.6224	11.5316	2.1593	1.6207	0.3228	1.3956	-2.28852	0.0024708	0.0497139	down
Unigene0040394	4.8707	1.4694	7.7736	0.9403	0.7107	1.2369	-2.289	0.00167138	0.0401953	down
Unigene0032687	10.735	5.0977	13.9092	3.2311	1.3677	1.4822	-2.29012	0.00136178	0.0358136	down
Unigene0056094	3.5104	2.4272	3.8146	0.5376	0.9482	0.5078	-2.29035	0.00207876	0.0452098	down
Unigene0009826	5.205	11.1787	39.8982	2.9315	5.8322	2.7133	-2.29393	0.00206589	0.0450529	down
Unigene0051627	21.1483	10.2477	30.9678	3.5887	4.1494	4.9272	-2.29983	4.4677e-05	0.00397824	down
Unigene0031249	10.3707	4.208	12.8455	1.1179	1.8317	2.5884	-2.30801	0.000350802	0.015965	down
Unigene0029545	7.5344	2.9503	7.8852	0.7903	1.0802	1.8348	-2.30968	0.000510597	0.0199254	down
Unigene0063795	27.8491	24.336	2.6838	3.6335	4.7938	2.6295	-2.31105	0.00187338	0.0428194	down
Unigene0047108	3.8275	15.4263	2.9714	2.5786	0.7042	1.1941	-2.31162	0.00155435	0.0385339	down
Unigene0048793	1.3406	5.856	0.9725	0.7927	0.2063	0.6444	-2.31349	0.00212493	0.0457015	down
Unigene0012862	34.0163	56.8443	189.846	19.5055	21.9767	14.9074	-2.31556	0.000211202	0.01144	down
Unigene0009485	77.2728	352.185	65.7011	64.6412	11.962	22.8104	-2.31638	0.00181425	0.0420492	down
Unigene0036487	4.4096	1.2897	3.7053	0.6539	0.7662	0.4632	-2.3201	0.000816272	0.0264037	down
Unigene0009148	8.9844	44.5941	11.4259	7.2889	1.1395	4.459	-2.33458	0.0017784	0.0415346	down
Unigene0012003	3.7588	17.3986	3.9468	2.4452	0.6697	1.8611	-2.33487	0.00108771	0.0313011	down
Unigene0007743	18.5692	5.0182	18.7231	3.1107	2.3361	2.9379	-2.33518	0.000850216	0.0269419	down
Unigene0033300	6.6921	17.5182	19.3765	4.4048	0.6516	3.5787	-2.33561	0.00125549	0.034248	down
Unigene0050493	7.28	28.23	5.1003	4.7562	0.6725	2.6139	-2.33611	0.00206068	0.0449618	down
Unigene0008135	19.3654	6.4878	28.8044	3.6085	3.7172	3.4985	-2.33616	0.000112882	0.0074122	down
Unigene0008718	6.2119	2.1369	4.3204	0.3646	1.447	0.6888	-2.34109	0.00214818	0.0460086	down
Unigene0033614	5.1793	17.6746	2.1109	2.7087	0.5231	1.69	-2.34264	0.0024173	0.0491332	down
Unigene0004088	10.06	40.8584	10.123	6.8526	1.2625	3.903	-2.34458	0.000957497	0.0288008	down
Unigene0009722	4.4884	16.0418	2.5455	2.2576	0.4778	1.8017	-2.34653	0.00167772	0.0402957	down
Unigene0064177	3.6257	0.9454	4.8812	0.789	0.5845	0.4844	-2.34699	0.00107521	0.0310515	down
Unigene0027698	3.0747	1.708	3.7259	0.592	0.5783	0.4946	-2.35349	0.000313522	0.0147939	down
Unigene0006540	60.2072	300.569	78.7415	47.7318	5.0512	33.0676	-2.35602	0.0023094	0.0479865	down
Unigene0017439	5.5646	2.8979	7.4177	0.9609	1.1239	1.003	-2.36258	0.000506787	0.0198309	down
Unigene0044380	5.9764	40.0027	8.2834	5.3877	0.8874	4.2371	-2.36789	0.00244116	0.0493249	down
Unigene0065499	6.0463	2.3253	6.0313	0.6509	1.0825	1.0539	-2.36942	0.000717256	0.0244665	down
Unigene0023634	6.9324	46.8197	9.0677	6.0862	1.3675	4.6458	-2.37627	0.00235141	0.0483971	down
Unigene0011610	3.3169	2.085	3.3899	0.5352	0.3447	0.8132	-2.37649	0.000363276	0.0163565	down
Unigene0047313	14.1231	53.5086	11.0249	8.0679	1.4474	5.6314	-2.37656	0.00107145	0.0310177	down
Unigene0043516	16.1955	68.3968	11.8256	10.103	1.3707	7.0749	-2.37799	0.00221728	0.0468594	down
Unigene0053025	1.2464	3.4077	1.523	0.5918	0.3296	0.2648	-2.38058	0.00197777	0.044059	down
Unigene0045593	3.1179	8.6827	1.7346	1.4994	0.2415	0.8569	-2.38135	0.001136	0.0322071	down
Unigene0042599	9.0164	2.401	13.5743	1.4125	0.9834	2.3872	-2.38543	0.000920849	0.0281711	down
Unigene0033990	6.4093	2.3385	9.5635	0.7583	1.7333	1.0026	-2.3897	0.000538767	0.0205896	down
Unigene0035104	9.1923	30.5829	6.9133	5.5534	0.8955	2.4477	-2.39174	0.00204171	0.0447447	down
Unigene0044715	1.7177	8.4759	1.8513	1.1775	0.3398	0.7751	-2.39349	0.00194746	0.0437053	down
Unigene0041002	2.4626	10.0137	3.557	1.9695	0.3335	0.7441	-2.39556	0.00176173	0.0413066	down
Unigene0068903	2.2324	1.4064	4.3884	0.479	0.553	0.4935	-2.39561	0.00165605	0.0399109	down
Unigene0015153	25.9921	140.714	37.0731	21.4446	4.8042	12.4117	-2.39808	0.000864408	0.027198	down
Unigene0050446	6.1955	18.521	4.0064	2.6127	0.2938	2.5416	-2.39838	0.00189192	0.0430507	down
Unigene0045490	6.8021	2.2179	10.9743	1.2615	1.3349	1.1914	-2.40016	0.000622711	0.0223493	down
Unigene0037021	1.2906	5.1287	1.2279	0.5955	0.2521	0.5999	-2.40137	0.0019777	0.044059	down
Unigene0009216	17.095	95.7286	14.9436	14.4286	2.8163	6.9369	-2.40152	0.00171563	0.0406776	down
Unigene0047383	2.8501	14.3544	3.0628	2.0869	0.3538	1.3873	-2.40449	0.00167508	0.040248	down
Unigene0042284	6.4478	3.5129	11.3463	1.2561	0.7696	1.9981	-2.4047	0.000966911	0.0290052	down
Unigene0004065	24.4327	5.6641	29.374	2.9746	3.3107	4.9407	-2.40534	0.000273497	0.0135746	down
Unigene0003427	3.3192	11.8227	2.4063	1.9442	0.3957	0.9711	-2.40598	0.00156053	0.0386203	down
Unigene0001814	10.101	43.9168	8.2841	6.6547	0.8803	4.2002	-2.40843	0.00190949	0.043177	down
Unigene0000097	3.8678	18.301	3.0644	2.9386	0.5612	1.2521	-2.40875	0.00248463	0.0498692	down
Unigene0044121	2.8497	11.602	4.2603	1.7598	0.4274	1.3351	-2.40937	0.0011493	0.0324746	down
Unigene0040393	4.391	0.8385	5.4021	0.7682	0.542	0.691	-2.40942	0.00222979	0.0470007	down
Unigene0066579	17.0982	6.1944	13.2885	2.6754	2.5167	1.6846	-2.41131	0.000154298	0.00926691	down
Unigene0027893	4.796	20.5307	6.3388	3.1404	0.6596	2.1509	-2.41173	0.000824242	0.0265463	down
Unigene0050543	5.2273	15.6624	3.1124	2.5885	0.5043	1.4116	-2.41375	0.000816525	0.0264037	down
Unigene0003480	4.0696	2.4046	4.3105	0.7693	0.7515	0.503	-2.41385	0.0010589	0.0308181	down
Unigene0049707	81.0803	315.53	73.2122	49.0441	6.0051	32.7188	-2.42035	0.00119148	0.0332735	down
Unigene0048218	4.2909	19.5039	3.2282	2.8426	0.4948	1.7045	-2.42215	0.00161184	0.0393074	down
Unigene0051933	3.3639	9.0205	2.5868	1.2963	0.5694	0.924	-2.42401	0.000429328	0.0180192	down
Unigene0071818	2.6551	1.0324	1.8363	0.1416	0.5743	0.312	-2.42596	0.00186801	0.0428194	down
Unigene0036819	1.5481	7.4676	1.7908	1.1132	0.1683	0.7188	-2.43361	0.00218345	0.0464741	down
Unigene0003120	3.0496	3.0801	7.227	0.813	0.8212	0.8376	-2.43393	0.000338818	0.015538	down
Unigene0044125	6.8939	2.1744	10.5055	1.0591	1.6152	0.9414	-2.43658	0.000442649	0.0183317	down
Unigene0024200	4.9103	23.7637	5.1058	3.094	0.5877	2.5476	-2.43902	0.00213591	0.0458143	down
Unigene0030840	2.9957	13.6011	4.4747	2.2423	0.3901	1.2329	-2.44664	0.000923271	0.0281971	down
Unigene0038941	2.8112	14.6207	3.4211	1.986	0.4758	1.3625	-2.44699	0.00118108	0.0330482	down
Unigene0041422	2.6471	15.695	3.5439	2.292	0.3333	1.3881	-2.44711	0.00239781	0.0489066	down
Unigene0049902	5.1659	21.9692	4.8996	2.9349	0.5495	2.3881	-2.44759	0.000900907	0.0277741	down
Unigene0008888	1.609	6.9414	1.308	1.0583	0.2036	0.5452	-2.44768	0.00211635	0.0455444	down
Unigene0013085	2.8739	8.7078	2.1683	1.3373	0.3538	0.8288	-2.44799	0.00088447	0.0275486	down
Unigene0038382	2.4969	9.9994	2.1315	1.5015	0.3276	0.848	-2.44997	0.00123484	0.0339168	down
Unigene0034658	2.6511	6.1911	1.6702	0.7253	0.2952	0.8958	-2.4557	0.00107314	0.0310187	down
Unigene0047264	3.7702	11.9417	1.8412	1.9594	0.2416	0.9972	-2.45639	0.0020528	0.0448764	down
Unigene0002343	6.4184	1.337	6.6808	0.558	1.1219	0.9485	-2.45743	0.00203713	0.0447384	down
Unigene0043680	1.9604	7.5863	2.1511	1.1759	0.1276	0.8258	-2.45779	0.00247704	0.0497696	down
Unigene0009825	5.1775	10.8368	26.2166	2.5141	3.0778	2.0951	-2.45781	0.000280728	0.0137999	down
Unigene0034698	9.1171	3.4742	10.9577	1.2449	1.3174	1.7216	-2.45867	0.000198933	0.0109911	down
Unigene0035982	14.3565	59.3781	12.3287	8.8199	0.7568	6.0787	-2.45874	0.00245635	0.0495534	down
Unigene0045588	10.9691	42.2727	7.1225	6.6002	0.832	3.4979	-2.46539	0.00176618	0.0413724	down
Unigene0022005	1.6457	6.4081	1.6921	0.7846	0.1875	0.7889	-2.4684	0.00234042	0.0483274	down
Unigene0048780	17.1063	111.113	14.26	13.0167	2.318	10.3777	-2.47021	0.00231866	0.0480953	down
Unigene0050120	18.5702	88.84	22.0447	13.0919	1.4471	8.8159	-2.47065	0.0014196	0.0365123	down
Unigene0003891	5.7363	2.8097	8.2891	0.589	0.9841	1.4638	-2.4708	0.000264918	0.0132866	down
Unigene0041339	8.3951	33.2114	7.351	4.6733	0.4751	3.6814	-2.47108	0.00193739	0.0436156	down
Unigene0032118	4.5839	18.3973	3.9628	2.444	0.9052	1.5004	-2.47403	0.000654552	0.0230456	down
Unigene0001912	2.1182	9.173	1.4999	1.0976	0.303	0.9014	-2.47418	0.00229138	0.0477087	down
Unigene0044219	24.8821	11.6408	24.4077	3.5039	4.0578	3.3718	-2.47841	2.09755e-05	0.00230893	down
Unigene0043418	2.868	1.9552	5.3055	0.6256	0.5517	0.64	-2.47858	0.000929412	0.0283244	down
Unigene0047601	8.7472	43.1215	6.3486	5.4921	0.8375	4.0809	-2.48341	0.00185697	0.042754	down
Unigene0008517	1.4539	6.5476	1.3536	0.7752	0.293	0.6014	-2.48625	0.00228595	0.0476672	down
Unigene0006805	39.4016	230.929	54.5597	30.8017	5.3543	21.7974	-2.48699	0.00106572	0.0309413	down
Unigene0030056	6.0069	31.3219	6.434	4.4198	0.6327	2.7425	-2.48908	0.00157376	0.0388675	down
Unigene0048548	14.6075	73.4399	17.0743	9.9039	1.1095	7.6741	-2.49192	0.00163567	0.0396328	down
Unigene0005834	10.3741	42.075	9.1476	5.8521	0.9055	4.185	-2.4929	0.000764727	0.0253391	down
Unigene0029023	3.8697	22.0377	3.088	2.3968	0.8372	1.912	-2.4943	0.00129934	0.03477	down
Unigene0000791	4.2233	13.1683	2.3374	1.8523	0.4612	1.1834	-2.49617	0.0023323	0.0483086	down
Unigene0019598	7.165	32.7098	7.2078	4.3759	0.588	3.3784	-2.49668	0.00166773	0.0401324	down
Unigene0010503	3.527	9.4308	2.6466	1.8104	0.3564	0.5964	-2.49754	0.00204214	0.0447447	down
Unigene0067423	5.6529	29.9526	7.8654	4.2312	0.6134	2.8466	-2.49877	0.00225288	0.0472776	down
Unigene0020358	1.7441	5.5225	1.364	0.6695	0.3543	0.5006	-2.50122	0.00108013	0.0311454	down
Unigene0045870	4.4189	22.4302	5.338	3.8421	0.3774	1.4546	-2.50402	0.00226141	0.0473873	down
Unigene0049663	99.1621	651.067	226.507	76.7673	32.4791	62.4479	-2.50813	0.000140418	0.00868776	down
Unigene0043850	6.6188	14.0973	2.0211	2.2686	0.6288	1.0968	-2.50908	0.000968643	0.0290052	down
Unigene0036181	4.416	21.4805	4.2002	2.3589	0.2758	2.634	-2.51409	0.00229342	0.0477376	down
Unigene0044479	6.7479	42.053	10.3659	5.734	0.9042	3.7166	-2.51449	0.00121603	0.0335751	down
Unigene0003661	6.843	36.8744	10.0555	5.5692	0.5613	3.2789	-2.5147	0.00180499	0.0419302	down
Unigene0027501	2.6029	1.4283	3.0398	0.2031	0.6985	0.3357	-2.51472	0.00218351	0.0464741	down
Unigene0028103	2.9129	1.3069	2.8609	0.3584	0.3161	0.5642	-2.51507	0.00240107	0.0489419	down
Unigene0042013	4.5234	17.0603	3.0556	1.8723	0.3694	2.068	-2.5153	0.00110182	0.0315552	down
Unigene0004399	7.801	3.4575	8.0464	0.7301	0.9833	1.6612	-2.51618	0.000119267	0.00772548	down
Unigene0013157	8.6625	3.9724	13.9647	1.2787	1.5007	1.8664	-2.51741	3.92913e-05	0.00364805	down
Unigene0039180	12.7841	71.5519	16.2074	10.1085	1.1024	6.3405	-2.51816	0.00187	0.0428194	down
Unigene0041810	15.9018	67.8087	13.4116	9.2287	1.0038	6.6966	-2.52029	0.0014621	0.0370796	down
Unigene0008344	1.7325	7.7146	2.1704	0.9535	0.1261	0.9428	-2.52216	0.00202721	0.0445478	down
Unigene0006673	2.9988	17.3896	4.6304	2.1156	0.3508	1.8876	-2.5226	0.00102973	0.0302103	down
Unigene0045417	2.7348	11.8992	2.0633	1.4634	0.202	1.2394	-2.5231	0.00159354	0.039106	down
Unigene0050214	3.1743	9.9304	1.5776	1.0689	0.1493	1.3321	-2.52534	0.00176807	0.041374	down
Unigene0040962	3.254	1.2174	3.4976	0.2124	0.6182	0.5518	-2.52722	0.00238971	0.0488769	down
Unigene0018755	1.4429	8.4484	2.1161	0.7173	0.363	1.0015	-2.52802	0.00189855	0.0430926	down
Unigene0046002	17.5978	106.48	25.6374	12.7702	2.5973	10.5398	-2.53079	0.000754127	0.0251387	down
Unigene0008685	6.3075	27.5441	6.3071	3.7679	0.6319	2.5474	-2.53121	0.000793	0.0259406	down
Unigene0055149	11.68	3.5319	13.9811	1.0547	1.7538	2.2412	-2.53135	0.00017261	0.00998245	down
Unigene0010388	2.968	4.5843	1.2853	0.5934	0.4289	0.5058	-2.53192	0.000122974	0.00791555	down
Unigene0033164	6.4888	41.8228	10.9697	5.4788	0.4975	4.2694	-2.53256	0.00234769	0.0483761	down
Unigene0048433	6.0876	19.2572	4.0527	2.9914	0.2228	1.8393	-2.54034	0.00179622	0.0418148	down
Unigene0035639	3.4486	2.4164	3.8153	0.1254	0.5307	1.0064	-2.5417	0.00243735	0.0492756	down
Unigene0045818	5.1668	19.4094	3.9751	2.7282	0.3503	1.822	-2.54256	0.00101543	0.0298678	down
Unigene0044830	4.0767	1.7939	9.0286	0.7327	0.504	1.3148	-2.54582	0.000901607	0.0277837	down
Unigene0009824	6.0216	21.1229	81.9855	8.2642	7.9904	2.3584	-2.55167	0.00189439	0.0430569	down
Unigene0044048	5.2432	16.0016	2.8734	2.4756	0.3208	1.3122	-2.5534	0.00158018	0.0389356	down
Unigene0006153	114.113	484.784	101.229	65.9966	9.0231	44.178	-2.55426	0.000697307	0.0240489	down
Unigene0032902	7.9602	1.7498	12.0031	0.9374	0.9093	1.8444	-2.55644	0.000744521	0.0249773	down
Unigene0032057	1.525	11.2689	3.5867	0.8987	0.3396	1.5459	-2.55665	0.00212661	0.0457103	down
Unigene0050824	6.8891	17.547	3.0333	2.3496	0.4447	1.8709	-2.55781	0.000395682	0.0172423	down
Unigene0006432	4.1188	10.5442	0.6204	0.8334	0.686	1.062	-2.56574	0.00135699	0.0357267	down
Unigene0032353	8.2905	27.152	3.4318	3.5811	0.5253	2.4446	-2.56903	0.00186976	0.0428194	down
Unigene0005501	5.4815	21.2087	3.693	2.0123	0.6274	2.4775	-2.56985	0.000517	0.0200785	down
Unigene0035467	1.7491	14.2507	4.2133	1.5802	0.2741	1.5414	-2.57351	0.00228835	0.047701	down
Unigene0034801	1.9912	6.324	1.1514	0.877	0.1465	0.5667	-2.57364	0.00227845	0.0475914	down
Unigene0040634	3.1381	8.7161	1.3163	1.3836	0.3405	0.4862	-2.575	0.00223539	0.0470482	down
Unigene0039337	2.6494	5.9278	2.6623	1.0987	0.083	0.7041	-2.57533	0.00242353	0.0492158	down
Unigene0038824	1.7363	7.1079	1.3554	0.483	0.2556	0.9693	-2.57822	0.00220002	0.0467147	down
Unigene0010594	2.854	11.9749	2.1785	1.5066	0.1909	1.1418	-2.58256	0.00127151	0.034424	down
Unigene0065071	4.3286	4.6998	3.5589	0.8392	0.6661	0.5945	-2.58365	0.000991594	0.0293956	down
Unigene0004892	2.848	1.2854	2.6042	0.2847	0.3013	0.5378	-2.58385	0.00137064	0.0359371	down
Unigene0041627	37.2108	225.645	52.5556	27.6095	3.9964	20.9736	-2.58466	0.000820379	0.0264742	down
Unigene0037504	10.0209	46.5469	10.4305	5.7992	0.6848	4.6779	-2.58554	0.0011367	0.0322071	down
Unigene0027062	1.2345	8.1309	2.6035	1.1283	0.199	0.666	-2.58606	0.00201717	0.0444632	down
Unigene0010278	0.9839	8.9102	2.8307	1.0975	0.2191	0.8018	-2.5866	0.00228505	0.0476672	down
Unigene0029265	2.9485	11.3955	2.1527	1.6557	0.4248	0.6634	-2.58788	0.0022312	0.0470037	down
Unigene0035612	0.9523	4.9263	1.9948	0.6664	0.403	0.2398	-2.5883	0.00158564	0.0390006	down
Unigene0014560	3.0202	13.1994	3.3939	1.331	0.626	1.3036	-2.58864	0.000829169	0.0266175	down
Unigene0064394	17.5833	7.6498	20.4885	3.2356	3.424	0.9403	-2.58882	0.000451233	0.0185375	down
Unigene0023817	3.0142	14.7555	21.4226	1.13	3.7468	1.6364	-2.58913	0.00121314	0.033566	down
Unigene0031758	6.2748	34.4466	13.9617	5.3136	0.7497	3.0111	-2.59122	0.00105775	0.0308181	down
Unigene0031573	4.2301	13.0961	3.6501	2.0629	0.3493	1.0651	-2.59272	0.000688597	0.0238172	down
Unigene0043171	3.804	11.5742	2.1617	1.671	0.3415	0.8925	-2.59403	0.000445741	0.0183961	down
Unigene0010710	1.8622	5.2996	1.326	0.8707	0.1455	0.3895	-2.5941	0.00169511	0.040398	down
Unigene0016831	6.5721	31.981	6.0837	4.0209	0.3894	2.9785	-2.59482	0.00193489	0.043614	down
Unigene0037136	2.6618	9.1785	1.9659	1.0191	0.1917	1.0695	-2.59802	0.00124955	0.0341834	down
Unigene0009088	3.3957	1.8653	6.7042	0.5431	0.5961	0.836	-2.59877	0.000112645	0.00740834	down
Unigene0005342	64.5541	20.9347	85.8196	8.7659	9.6981	9.7844	-2.60035	1.0351e-05	0.00135317	down
Unigene0001295	3.336	13.9558	3.3208	1.9528	0.3493	1.0911	-2.60281	0.00100929	0.0297481	down
Unigene0011711	4.4463	34.0005	8.0845	3.1059	0.8098	3.7411	-2.60339	0.0013261	0.0352335	down
Unigene0041931	4.4255	17.5294	2.8045	2.134	0.358	1.5731	-2.60661	0.000853312	0.0270027	down
Unigene0025826	3.059	1.0864	2.161	0.2406	0.3395	0.4545	-2.60774	0.00121041	0.0335279	down
Unigene0018062	3.5467	16.3841	2.9387	2.0105	0.345	1.3959	-2.60792	0.000779331	0.0256807	down
Unigene0063612	1.3007	5.8112	1.0601	0.7968	0.1874	0.3554	-2.60889	0.00232959	0.0482942	down
Unigene0004821	31.7995	133.61	21.334	17.0597	2.8818	10.6494	-2.60989	0.000615439	0.0222756	down
Unigene0022148	1.2009	5.8715	1.2295	0.6886	0.1918	0.4792	-2.61026	0.00140997	0.036407	down
Unigene0023409	3.4182	1.1855	5.3818	0.5024	0.5317	0.6001	-2.61125	0.000117794	0.00767159	down
Unigene0009816	9.7129	15.644	68.1563	5.5114	5.5568	4.2216	-2.6126	0.000193266	0.0108196	down
Unigene0023148	2.4567	11.3558	2.0224	1.2823	0.1532	1.1525	-2.6132	0.00156409	0.0386685	down
Unigene0008652	17.1737	108.557	22.7476	13.7349	1.8466	8.6658	-2.61435	0.00120917	0.0335066	down
Unigene0039713	1.3525	8.7007	1.7141	0.7317	0.1683	1.0216	-2.6144	0.00212974	0.0457502	down
Unigene0037361	7.095	24.6266	6.2869	3.482	0.7214	2.001	-2.61496	0.000231233	0.0121491	down
Unigene0046042	3.3224	11.7496	2.2916	1.6684	0.1526	1.0116	-2.61587	0.00137593	0.036001	down
Unigene0027828	13.8014	46.0001	5.1829	5.5838	1.3055	3.71	-2.61612	0.000721499	0.0245157	down
Unigene0002726	3.1743	11.2506	2.9256	1.2515	0.227	1.3508	-2.61646	0.00136367	0.0358368	down
Unigene0041943	5.1857	16.6167	2.3582	1.7535	0.2259	1.9585	-2.61716	0.00156315	0.0386586	down
Unigene0010930	4.6446	24.9379	3.6819	2.2878	0.5727	2.5557	-2.61863	0.00109616	0.0314811	down
Unigene0004063	3.4214	14.0328	5.6123	1.7938	0.2574	1.6942	-2.62261	0.000866115	0.0272397	down
Unigene0008829	16.2904	4.641	21.7889	2.2105	2.1266	2.5938	-2.62381	3.92698e-05	0.00364805	down
Unigene0009401	9.3565	51.0826	8.7949	5.1417	1.3117	4.7694	-2.62505	0.000704603	0.0242416	down
Unigene0035534	3.1862	1.5632	4.7526	0.3334	0.5544	0.6523	-2.62521	0.000180016	0.0102538	down
Unigene0051337	7.1374	34.4915	70.0766	9.1176	0.9284	8.0134	-2.62888	0.00166804	0.0401324	down
Unigene0053888	4.6537	3.0205	6.2937	0.5877	1.0779	0.592	-2.62925	0.000118395	0.00769676	down
Unigene0009904	2.0702	2.1432	2.8535	0.301	0.3186	0.5212	-2.63103	0.000737454	0.0248601	down
Unigene0006678	6.8539	23.0526	3.4933	3.561	0.2964	1.5305	-2.63204	0.00196137	0.0439075	down
Unigene0045601	2.4362	11.9071	2.2633	1.2504	0.2462	1.181	-2.63274	0.00170554	0.0405367	down
Unigene0048163	58.3263	242.843	64.2918	31.2231	3.5879	24.0427	-2.63451	0.000518818	0.0200948	down
Unigene0038391	1.8501	7.2589	1.6275	0.8156	0.0986	0.8143	-2.63493	0.00142707	0.0365875	down
Unigene0009111	2.2734	1.9645	3.6955	0.2694	0.4988	0.5088	-2.63518	0.00127212	0.034424	down
Unigene0011523	3.049	5.9165	1.2999	1.0689	0.1414	0.4417	-2.6355	0.00210363	0.0453953	down
Unigene0036229	3.1511	1.4372	4.8704	0.5836	0.3369	0.6013	-2.63586	0.000249349	0.0127554	down
Unigene0012798	2.2903	11.9464	2.6318	1.8317	0.4652	0.4152	-2.63685	0.00227379	0.0475576	down
Unigene0011168	9.3335	44.815	10.2505	6.1712	0.5475	3.6297	-2.63763	0.00147218	0.0372051	down
Unigene0071895	2.9837	9.9447	1.5212	0.9943	0.7014	0.626	-2.63778	0.00194017	0.0436372	down
Unigene0035625	1.9855	11.1167	2.8597	1.2393	0.1639	1.1522	-2.64301	0.00162028	0.0393929	down
[truncated: 1,586 more rows]
