# Supplementary material for: Transcriptome Analysis Reveals the Molecular Response to Salinity Challenge in Larvae of the Giant Freshwater Prawn Macrobrachium rosenbergii
Source: Front Physiol. 2022 Apr 29;13:885035. doi: 10.3389/fphys.2022.885035 (PMC9099292; doi:10.3389/fphys.2022.885035)
Supplement: Supplementary file 10 [file Table7.XLS]

## Sheet: S13 VS S16.GO terms
Table S7 The top 20 differentially enriched GO terms in three major functional categories between S13 and S16.
GO terms	GO ID	Description	GeneRatio (322)	BgRatio (2949)	pvalue	qvalue	geneID
Cellular Component	GO:0030529	intracellular ribonucleoprotein complex	171	1055	1.2e-11	5.34e-10	Unigene0000498;Unigene0000530;Unigene0001776;Unigene0002020;Unigene0002567;Unigene0002649;Unigene0003396;Unigene0004161;Unigene0005123;Unigene0005418;Unigene0005871;Unigene0006540;Unigene0006849;Unigene0008877;Unigene0009366;Unigene0009492;Unigene0009577;Unigene0009728;Unigene0009926;Unigene0010235;Unigene0013407;Unigene0013474;Unigene0014003;Unigene0014357;Unigene0015521;Unigene0015581;Unigene00…
	GO:1990904	ribonucleoprotein complex	171	1055	1.2e-11	5.34e-10	Unigene0000498;Unigene0000530;Unigene0001776;Unigene0002020;Unigene0002567;Unigene0002649;Unigene0003396;Unigene0004161;Unigene0005123;Unigene0005418;Unigene0005871;Unigene0006540;Unigene0006849;Unigene0008877;Unigene0009366;Unigene0009492;Unigene0009577;Unigene0009728;Unigene0009926;Unigene0010235;Unigene0013407;Unigene0013474;Unigene0014003;Unigene0014357;Unigene0015521;Unigene0015581;Unigene00…
	GO:0005622	intracellular	275	2236	5.9e-06	0.000175033	Unigene0000498;Unigene0000530;Unigene0000831;Unigene0001776;Unigene0001972;Unigene0002019;Unigene0002020;Unigene0002567;Unigene0002649;Unigene0002910;Unigene0002976;Unigene0003396;Unigene0003494;Unigene0004143;Unigene0004161;Unigene0005123;Unigene0005215;Unigene0005418;Unigene0005823;Unigene0005871;Unigene0006540;Unigene0006805;Unigene0006849;Unigene0007068;Unigene0007177;Unigene0007235;Unigene00…
	GO:0005623	cell	284	2355	2.2e-05	0.0003916	Unigene0000498;Unigene0000530;Unigene0000831;Unigene0001776;Unigene0001972;Unigene0002019;Unigene0002020;Unigene0002413;Unigene0002567;Unigene0002649;Unigene0002910;Unigene0002976;Unigene0003396;Unigene0003494;Unigene0004143;Unigene0004161;Unigene0005123;Unigene0005215;Unigene0005418;Unigene0005823;Unigene0005871;Unigene0006540;Unigene0006805;Unigene0006849;Unigene0007068;Unigene0007177;Unigene00…
	GO:0044464	cell part	284	2355	2.2e-05	0.0003916	Unigene0000498;Unigene0000530;Unigene0000831;Unigene0001776;Unigene0001972;Unigene0002019;Unigene0002020;Unigene0002413;Unigene0002567;Unigene0002649;Unigene0002910;Unigene0002976;Unigene0003396;Unigene0003494;Unigene0004143;Unigene0004161;Unigene0005123;Unigene0005215;Unigene0005418;Unigene0005823;Unigene0005871;Unigene0006540;Unigene0006805;Unigene0006849;Unigene0007068;Unigene0007177;Unigene00…
	GO:0044424	intracellular part	258	2093	5.1e-05	0.000673857	Unigene0000498;Unigene0000530;Unigene0000831;Unigene0001776;Unigene0002020;Unigene0002567;Unigene0002649;Unigene0003396;Unigene0003494;Unigene0004143;Unigene0004161;Unigene0005123;Unigene0005215;Unigene0005418;Unigene0005823;Unigene0005871;Unigene0006540;Unigene0006805;Unigene0006849;Unigene0007177;Unigene0007235;Unigene0008553;Unigene0008652;Unigene0008877;Unigene0009216;Unigene0009366;Unigene00…
	GO:0032991	macromolecular complex	196	1491	5.3e-05	0.000673857	Unigene0000498;Unigene0000530;Unigene0001776;Unigene0002020;Unigene0002567;Unigene0002649;Unigene0003396;Unigene0004161;Unigene0005123;Unigene0005215;Unigene0005418;Unigene0005871;Unigene0006540;Unigene0006805;Unigene0006849;Unigene0008877;Unigene0009366;Unigene0009492;Unigene0009577;Unigene0009728;Unigene0009926;Unigene0009961;Unigene0010235;Unigene0013407;Unigene0013474;Unigene0014003;Unigene00…
	GO:0044391	ribosomal subunit	47	293	0.0031	0.0336222	Unigene0002567;Unigene0004161;Unigene0005871;Unigene0006849;Unigene0009366;Unigene0009577;Unigene0009926;Unigene0013474;Unigene0015521;Unigene0016861;Unigene0019451;Unigene0019610;Unigene0022784;Unigene0023889;Unigene0024098;Unigene0024733;Unigene0027809;Unigene0029376;Unigene0030208;Unigene0030989;Unigene0032044;Unigene0032424;Unigene0037073;Unigene0038003;Unigene0041468;Unigene0047362;Unigene00…
	GO:0005815	microtubule organizing center	6	15	0.0034	0.0336222	Unigene0000831;Unigene0009961;Unigene0034100;Unigene0034190;Unigene0051540;Unigene0053461
	GO:0005840	ribosome	51	333	0.0055	0.04895	Unigene0002567;Unigene0004161;Unigene0005871;Unigene0006849;Unigene0009366;Unigene0009577;Unigene0009728;Unigene0009926;Unigene0013474;Unigene0015521;Unigene0016861;Unigene0019451;Unigene0019610;Unigene0022784;Unigene0023889;Unigene0024098;Unigene0024733;Unigene0027809;Unigene0029376;Unigene0030208;Unigene0030989;Unigene0032044;Unigene0032424;Unigene0035684;Unigene0037073;Unigene0038003;Unigene00…
	GO:0044421	extracellular region part	4	11	0.0247	0.199845	Unigene0002779;Unigene0009961;Unigene0053461;Unigene0061782
	GO:0015935	small ribosomal subunit	12	65	0.0455	0.337458	Unigene0006849;Unigene0015521;Unigene0019451;Unigene0024733;Unigene0027809;Unigene0041468;Unigene0053274;Unigene0054619;Unigene0057863;Unigene0058024;Unigene0059559;Unigene0065058
	GO:0044444	cytoplasmic part	66	503	0.0506	0.346415	Unigene0002567;Unigene0004161;Unigene0005871;Unigene0006849;Unigene0009366;Unigene0009577;Unigene0009728;Unigene0009926;Unigene0009970;Unigene0011262;Unigene0013474;Unigene0015073;Unigene0015521;Unigene0015535;Unigene0016264;Unigene0016861;Unigene0019451;Unigene0019610;Unigene0022784;Unigene0023889;Unigene0024098;Unigene0024640;Unigene0024733;Unigene0027809;Unigene0029376;Unigene0030208;Unigene00…
	GO:0005737	cytoplasm	66	510	0.0648	0.411943	Unigene0002567;Unigene0004161;Unigene0005871;Unigene0006849;Unigene0009366;Unigene0009577;Unigene0009728;Unigene0009926;Unigene0009970;Unigene0011262;Unigene0013474;Unigene0015073;Unigene0015521;Unigene0015535;Unigene0016264;Unigene0016861;Unigene0019451;Unigene0019610;Unigene0022784;Unigene0023889;Unigene0024098;Unigene0024640;Unigene0024733;Unigene0027809;Unigene0029376;Unigene0030208;Unigene00…
	GO:0005819	spindle	4	15	0.0721	0.427793	Unigene0000831;Unigene0034100;Unigene0034190;Unigene0051540
	GO:0005576	extracellular region	5	22	0.0835	0.464469	Unigene0000601;Unigene0002779;Unigene0009961;Unigene0053461;Unigene0061782
	GO:0044446	intracellular organelle part	70	557	0.0965	0.48594	Unigene0000831;Unigene0002567;Unigene0004161;Unigene0005215;Unigene0005871;Unigene0006805;Unigene0006849;Unigene0008553;Unigene0008652;Unigene0009366;Unigene0009577;Unigene0009926;Unigene0009961;Unigene0011262;Unigene0013474;Unigene0015153;Unigene0015521;Unigene0016031;Unigene0016861;Unigene0019451;Unigene0019610;Unigene0022005;Unigene0022784;Unigene0023889;Unigene0024098;Unigene0024733;Unigene00…
	GO:0043228	non-membrane-bounded organelle	82	665	0.1055	0.48594	Unigene0000831;Unigene0002567;Unigene0004143;Unigene0004161;Unigene0005215;Unigene0005823;Unigene0005871;Unigene0006849;Unigene0009366;Unigene0009577;Unigene0009728;Unigene0009860;Unigene0009926;Unigene0009961;Unigene0009994;Unigene0011269;Unigene0013474;Unigene0015521;Unigene0016739;Unigene0016837;Unigene0016861;Unigene0019451;Unigene0019610;Unigene0022005;Unigene0022784;Unigene0023889;Unigene00…
	GO:0043232	intracellular non-membrane-bounded organelle	82	665	0.1055	0.48594	Unigene0000831;Unigene0002567;Unigene0004143;Unigene0004161;Unigene0005215;Unigene0005823;Unigene0005871;Unigene0006849;Unigene0009366;Unigene0009577;Unigene0009728;Unigene0009860;Unigene0009926;Unigene0009961;Unigene0009994;Unigene0011269;Unigene0013474;Unigene0015521;Unigene0016739;Unigene0016837;Unigene0016861;Unigene0019451;Unigene0019610;Unigene0022005;Unigene0022784;Unigene0023889;Unigene00…
	GO:0030684	preribosome	1	1	0.1092	0.48594	Unigene0022005
	GO ID	Description	GeneRatio (340)	BgRatio (4216)	pvalue	qvalue	geneID
Molecular Function	GO:0005198	structural molecule activity	49	354	7.7e-05	0.015785	Unigene0004161;Unigene0009366;Unigene0009577;Unigene0009728;Unigene0009926;Unigene0010235;Unigene0015521;Unigene0016006;Unigene0016837;Unigene0016861;Unigene0017246;Unigene0019451;Unigene0022784;Unigene0023889;Unigene0024098;Unigene0029376;Unigene0030408;Unigene0032044;Unigene0037073;Unigene0037551;Unigene0039068;Unigene0040187;Unigene0040944;Unigene0040945;Unigene0043700;Unigene0047362;Unigene00…
	GO:0016836	hydro-lyase activity	7	22	0.0012	0.09225	Unigene0002286;Unigene0002703;Unigene0020020;Unigene0024620;Unigene0039416;Unigene0040704;Unigene0057135
	GO:0016835	carbon-oxygen lyase activity	7	23	0.0016	0.09225	Unigene0002286;Unigene0002703;Unigene0020020;Unigene0024620;Unigene0039416;Unigene0040704;Unigene0057135
	GO:0003723	RNA binding	30	215	0.0018	0.09225	Unigene0004161;Unigene0005123;Unigene0007177;Unigene0012003;Unigene0016448;Unigene0017246;Unigene0023889;Unigene0024815;Unigene0024816;Unigene0024817;Unigene0026323;Unigene0026324;Unigene0029376;Unigene0034100;Unigene0035197;Unigene0035198;Unigene0045032;Unigene0045928;Unigene0049532;Unigene0049920;Unigene0052172;Unigene0052203;Unigene0052310;Unigene0055614;Unigene0056623;Unigene0058555;Unigene00…
	GO:0043021	ribonucleoprotein complex binding	5	17	0.0091	0.3731	Unigene0019451;Unigene0035197;Unigene0035198;Unigene0052203;Unigene0061893
	GO:0008135	translation factor activity, RNA binding	18	129	0.0144	0.492	Unigene0007177;Unigene0012003;Unigene0024815;Unigene0024816;Unigene0024817;Unigene0026323;Unigene0026324;Unigene0034100;Unigene0035197;Unigene0035198;Unigene0045032;Unigene0045928;Unigene0049532;Unigene0049920;Unigene0052172;Unigene0052203;Unigene0055614;Unigene0061893
	GO:0044877	macromolecular complex binding	6	27	0.0182	0.533	Unigene0019451;Unigene0035197;Unigene0035198;Unigene0035480;Unigene0052203;Unigene0061893
	GO:0003676	nucleic acid binding	50	478	0.0283	0.688458	Unigene0002825;Unigene0004143;Unigene0004161;Unigene0005123;Unigene0005215;Unigene0005823;Unigene0007177;Unigene0009860;Unigene0009994;Unigene0011935;Unigene0012003;Unigene0016448;Unigene0016861;Unigene0017246;Unigene0023889;Unigene0024815;Unigene0024816;Unigene0024817;Unigene0026323;Unigene0026324;Unigene0029376;Unigene0034100;Unigene0035197;Unigene0035198;Unigene0035216;Unigene0035480;Unigene00…
	GO:0015297	antiporter activity	2	5	0.0551	0.688458	Unigene0018658;Unigene0037639
	GO:0032028	myosin head/neck binding	2	5	0.0551	0.688458	Unigene0034190;Unigene0051540
	GO:0032036	myosin heavy chain binding	2	5	0.0551	0.688458	Unigene0034190;Unigene0051540
	GO:0016769	transferase activity, transferring nitrogenous groups	4	19	0.0612	0.688458	Unigene0019061;Unigene0025796;Unigene0032267;Unigene0048548
	GO:0005488	binding	193	2221	0.0645	0.688458	Unigene0000326;Unigene0000601;Unigene0000831;Unigene0002286;Unigene0002703;Unigene0002779;Unigene0002825;Unigene0002833;Unigene0002918;Unigene0002965;Unigene0002994;Unigene0003427;Unigene0004088;Unigene0004143;Unigene0004161;Unigene0004904;Unigene0005123;Unigene0005215;Unigene0005733;Unigene0005823;Unigene0007039;Unigene0007050;Unigene0007177;Unigene0008238;Unigene0008250;Unigene0009216;Unigene00…
	GO:0097367	carbohydrate derivative binding	81	863	0.065	0.688458	Unigene0003427;Unigene0004904;Unigene0007050;Unigene0007177;Unigene0008250;Unigene0009216;Unigene0009970;Unigene0010244;Unigene0011262;Unigene0011295;Unigene0012003;Unigene0012874;Unigene0015535;Unigene0016837;Unigene0017574;Unigene0018439;Unigene0018514;Unigene0021905;Unigene0022302;Unigene0023189;Unigene0024316;Unigene0024640;Unigene0024815;Unigene0024816;Unigene0024817;Unigene0025451;Unigene00…
	GO:0016829	lyase activity	11	83	0.0677	0.688458	Unigene0002286;Unigene0002703;Unigene0004904;Unigene0008097;Unigene0020020;Unigene0024620;Unigene0039416;Unigene0040704;Unigene0057135;Unigene0064560;Unigene0064809
	GO:0004386	helicase activity	5	28	0.0699	0.688458	Unigene0034100;Unigene0044260;Unigene0045272;Unigene0048433;Unigene0049902
	GO:0016776	phosphotransferase activity, phosphate group as acceptor	4	20	0.0719	0.688458	Unigene0018439;Unigene0021905;Unigene0052168;Unigene0068085
	GO:0044822	poly(A) RNA binding	2	6	0.0783	0.688458	Unigene0023889;Unigene0034100
	GO:0000295	adenine nucleotide transmembrane transporter activity	1	1	0.0806	0.688458	Unigene0061563
	GO:0005337	nucleoside transmembrane transporter activity	1	1	0.0806	0.688458	Unigene0061563
	GO ID	Description	GeneRatio (396)	BgRatio (4239)	pvalue	qvalue	geneID
Biological Process	GO:0010467	gene expression	166	1193	4.3e-10	3.3196e-07	Unigene0000498;Unigene0000530;Unigene0001776;Unigene0002020;Unigene0002567;Unigene0003396;Unigene0004161;Unigene0005123;Unigene0005304;Unigene0005418;Unigene0005871;Unigene0006849;Unigene0008877;Unigene0009366;Unigene0009492;Unigene0009577;Unigene0009728;Unigene0009926;Unigene0011420;Unigene0013275;Unigene0013474;Unigene0014003;Unigene0015521;Unigene0015581;Unigene0016006;Unigene0016007;Unigene00…
	GO:0071704	organic substance metabolic process	277	2461	2e-07	6.948e-05	Unigene0000036;Unigene0000498;Unigene0000530;Unigene0001776;Unigene0002020;Unigene0002286;Unigene0002567;Unigene0002703;Unigene0002833;Unigene0003396;Unigene0003427;Unigene0003494;Unigene0004161;Unigene0004904;Unigene0005123;Unigene0005304;Unigene0005418;Unigene0005871;Unigene0006540;Unigene0006805;Unigene0006849;Unigene0007039;Unigene0007177;Unigene0008553;Unigene0008877;Unigene0009366;Unigene00…
	GO:0043170	macromolecule metabolic process	231	1960	2.7e-07	6.948e-05	Unigene0000498;Unigene0000530;Unigene0001776;Unigene0002020;Unigene0002567;Unigene0002833;Unigene0003396;Unigene0003427;Unigene0004161;Unigene0005123;Unigene0005304;Unigene0005418;Unigene0005871;Unigene0006540;Unigene0006849;Unigene0007039;Unigene0007177;Unigene0008553;Unigene0008877;Unigene0009366;Unigene0009492;Unigene0009577;Unigene0009728;Unigene0009864;Unigene0009926;Unigene0009961;Unigene00…
	GO:0008152	metabolic process	325	3150	8.2e-05	0.015826	Unigene0000036;Unigene0000326;Unigene0000337;Unigene0000498;Unigene0000499;Unigene0000530;Unigene0001776;Unigene0002020;Unigene0002286;Unigene0002567;Unigene0002703;Unigene0002833;Unigene0002994;Unigene0003396;Unigene0003427;Unigene0003494;Unigene0004088;Unigene0004161;Unigene0004340;Unigene0004363;Unigene0004904;Unigene0005123;Unigene0005304;Unigene0005418;Unigene0005733;Unigene0005871;Unigene00…
	GO:0006558	L-phenylalanine metabolic process	3	4	0.003	0.386	Unigene0000036;Unigene0035741;Unigene0038127
	GO:1902221	erythrose 4-phosphate/phosphoenolpyruvate family amino acid metabolic process	3	4	0.003	0.386	Unigene0000036;Unigene0035741;Unigene0038127
	GO:0009416	response to light stimulus	4	8	0.0039	0.430114	Unigene0009961;Unigene0034190;Unigene0051540;Unigene0053461
	GO:0022411	cellular component disassembly	6	20	0.008	0.514667	Unigene0012003;Unigene0035197;Unigene0035198;Unigene0051679;Unigene0052203;Unigene0061893
	GO:0032984	macromolecular complex disassembly	6	20	0.008	0.514667	Unigene0012003;Unigene0035197;Unigene0035198;Unigene0051679;Unigene0052203;Unigene0061893
	GO:0043241	protein complex disassembly	6	20	0.008	0.514667	Unigene0012003;Unigene0035197;Unigene0035198;Unigene0051679;Unigene0052203;Unigene0061893
	GO:0043624	cellular protein complex disassembly	6	20	0.008	0.514667	Unigene0012003;Unigene0035197;Unigene0035198;Unigene0051679;Unigene0052203;Unigene0061893
	GO:0006415	translational termination	4	10	0.01	0.514667	Unigene0035197;Unigene0035198;Unigene0052203;Unigene0061893
	GO:0006449	regulation of translational termination	4	10	0.01	0.514667	Unigene0035197;Unigene0035198;Unigene0052203;Unigene0061893
	GO:0009314	response to radiation	4	10	0.01	0.514667	Unigene0009961;Unigene0034190;Unigene0051540;Unigene0053461
	GO:0042254	ribosome biogenesis	4	10	0.01	0.514667	Unigene0005123;Unigene0019451;Unigene0022005;Unigene0024455
	GO:0043244	regulation of protein complex disassembly	5	16	0.0127	0.544463	Unigene0035197;Unigene0035198;Unigene0051679;Unigene0052203;Unigene0061893
	GO:0006364	rRNA processing	3	6	0.0131	0.544463	Unigene0005123;Unigene0022005;Unigene0024455
	GO:0009953	dorsal/ventral pattern formation	3	6	0.0131	0.544463	Unigene0009961;Unigene0053461;Unigene0055135
	GO:0006090	pyruvate metabolic process	10	49	0.0134	0.544463	Unigene0002286;Unigene0002703;Unigene0009790;Unigene0018108;Unigene0020020;Unigene0024620;Unigene0048218;Unigene0057135;Unigene0060857;Unigene0064560
	GO:0006414	translational elongation	6	23	0.0163	0.563171	Unigene0035197;Unigene0035198;Unigene0045928;Unigene0052172;Unigene0052203;Unigene0061893
