# Supplementary material for: Transcriptome Analysis Reveals the Molecular Response to Salinity Challenge in Larvae of the Giant Freshwater Prawn Macrobrachium rosenbergii
Source: Front Physiol. 2022 Apr 29;13:885035. doi: 10.3389/fphys.2022.885035 (PMC9099292; doi:10.3389/fphys.2022.885035)
Supplement: Supplementary file 11 [file Table11.XLS]

## Sheet: TF.class
Table S11 Identification of 1535 DEGs belong to different transcription factor families.
Family	Count	Genes
zf-C2H2	847	Unigene0000127;Unigene0000160;Unigene0000181;Unigene0000214;Unigene0000228;Unigene0000260;Unigene0000281;Unigene0000385;Unigene0000600;Unigene0000615;Unigene0000641;Unigene0000752;Unigene0000792;Unigene0000916;Unigene0000952;Unigene0001000;Unigene0001109;Unigene0001110;Unigene0001111;Unigene0001112;Unigene0001114;Unigene0001301;Unigene0001406;Unigene0001444;Unigene0001685;Unigene0001900;Unigene00…
Homeobox	98	Unigene0000265;Unigene0002720;Unigene0003010;Unigene0003251;Unigene0003463;Unigene0004737;Unigene0007201;Unigene0008927;Unigene0011097;Unigene0011312;Unigene0011657;Unigene0011838;Unigene0011936;Unigene0012010;Unigene0012235;Unigene0012287;Unigene0012552;Unigene0012674;Unigene0013027;Unigene0013058;Unigene0013364;Unigene0014335;Unigene0015475;Unigene0015476;Unigene0017604;Unigene0017900;Unigene00…
bHLH	80	Unigene0000163;Unigene0000627;Unigene0001157;Unigene0002924;Unigene0002941;Unigene0003103;Unigene0003450;Unigene0003567;Unigene0007946;Unigene0008245;Unigene0009302;Unigene0010538;Unigene0010939;Unigene0012573;Unigene0013920;Unigene0014105;Unigene0014223;Unigene0014310;Unigene0014311;Unigene0014390;Unigene0015858;Unigene0015859;Unigene0018094;Unigene0018772;Unigene0019508;Unigene0019509;Unigene00…
HMG	55	Unigene0002161;Unigene0008098;Unigene0008881;Unigene0010440;Unigene0010631;Unigene0010766;Unigene0011056;Unigene0012356;Unigene0013165;Unigene0015663;Unigene0016888;Unigene0018208;Unigene0019355;Unigene0026763;Unigene0028660;Unigene0028992;Unigene0029187;Unigene0030123;Unigene0031193;Unigene0031254;Unigene0031543;Unigene0034244;Unigene0036591;Unigene0037020;Unigene0037096;Unigene0038767;Unigene00…
MYB	39	Unigene0000069;Unigene0000835;Unigene0000935;Unigene0002167;Unigene0002259;Unigene0006229;Unigene0007219;Unigene0010610;Unigene0012758;Unigene0013273;Unigene0014197;Unigene0018263;Unigene0018264;Unigene0019429;Unigene0019670;Unigene0019671;Unigene0022198;Unigene0022310;Unigene0023382;Unigene0023435;Unigene0027651;Unigene0028961;Unigene0032916;Unigene0036592;Unigene0038730;Unigene0039496;Unigene00…
TF_bZIP	36	Unigene0000310;Unigene0006955;Unigene0007660;Unigene0009503;Unigene0012037;Unigene0012416;Unigene0014314;Unigene0017258;Unigene0017812;Unigene0022358;Unigene0025602;Unigene0028569;Unigene0029214;Unigene0032523;Unigene0032958;Unigene0033247;Unigene0035915;Unigene0036056;Unigene0036459;Unigene0037029;Unigene0038083;Unigene0039090;Unigene0042064;Unigene0042515;Unigene0043053;Unigene0043685;Unigene00…
ZBTB	32	Unigene0000666;Unigene0001871;Unigene0003645;Unigene0023416;Unigene0028492;Unigene0036488;Unigene0037011;Unigene0037310;Unigene0037359;Unigene0037893;Unigene0039087;Unigene0041028;Unigene0041158;Unigene0041442;Unigene0041930;Unigene0042477;Unigene0043898;Unigene0044302;Unigene0044681;Unigene0044821;Unigene0045554;Unigene0045603;Unigene0045604;Unigene0045605;Unigene0045609;Unigene0045680;Unigene00…
THR-like	24	Unigene0004339;Unigene0004734;Unigene0005896;Unigene0008641;Unigene0009875;Unigene0010457;Unigene0012411;Unigene0023163;Unigene0023164;Unigene0025974;Unigene0025975;Unigene0025976;Unigene0026592;Unigene0026593;Unigene0027244;Unigene0028675;Unigene0033322;Unigene0035725;Unigene0037292;Unigene0040385;Unigene0040386;Unigene0042171;Unigene0044730;Unigene0060856
ETS	20	Unigene0004086;Unigene0006102;Unigene0008483;Unigene0010565;Unigene0010821;Unigene0011989;Unigene0014180;Unigene0014735;Unigene0021644;Unigene0033152;Unigene0033241;Unigene0034456;Unigene0035427;Unigene0038275;Unigene0040262;Unigene0042297;Unigene0045747;Unigene0056556;Unigene0056731;Unigene0019933
RXR-like	18	Unigene0002713;Unigene0007012;Unigene0010995;Unigene0011215;Unigene0013491;Unigene0014112;Unigene0023401;Unigene0023402;Unigene0023403;Unigene0025994;Unigene0027518;Unigene0028146;Unigene0031995;Unigene0033474;Unigene0043927;Unigene0049001;Unigene0056818;Unigene0070497
Fork_head	18	Unigene0003279;Unigene0004520;Unigene0004908;Unigene0016619;Unigene0017072;Unigene0018632;Unigene0019261;Unigene0028588;Unigene0031531;Unigene0032398;Unigene0034880;Unigene0036324;Unigene0036880;Unigene0036881;Unigene0039611;Unigene0044071;Unigene0064553;Unigene0067092
CSD	18	Unigene0002624;Unigene0003454;Unigene0010374;Unigene0011538;Unigene0018294;Unigene0021428;Unigene0027876;Unigene0032957;Unigene0048393;Unigene0051365;Unigene0051900;Unigene0055621;Unigene0057364;Unigene0058082;Unigene0061088;Unigene0062182;Unigene0067334;Unigene0007165
THAP	15	Unigene0001088;Unigene0006041;Unigene0015485;Unigene0021975;Unigene0027670;Unigene0033093;Unigene0035106;Unigene0038268;Unigene0045180;Unigene0054067;Unigene0055218;Unigene0057390;Unigene0061068;Unigene0067008;Unigene0068664
TSC22	12	Unigene0006298;Unigene0012908;Unigene0033433;Unigene0036863;Unigene0036865;Unigene0036866;Unigene0036867;Unigene0043682;Unigene0060690;Unigene0070051;Unigene0066671;Unigene0071266
zf-GATA	12	Unigene0005279;Unigene0006035;Unigene0022270;Unigene0023791;Unigene0026835;Unigene0033232;Unigene0037534;Unigene0038797;Unigene0044371;Unigene0003435;Unigene0025542;Unigene0060309
zf-MIZ	10	Unigene0003395;Unigene0015159;Unigene0024787;Unigene0040071;Unigene0041234;Unigene0047612;Unigene0064215;Unigene0067316;Unigene0070858;Unigene0070859
RFX	10	Unigene0017766;Unigene0021852;Unigene0023107;Unigene0028271;Unigene0038752;Unigene0038753;Unigene0043527;Unigene0059295;Unigene0012412;Unigene0021451
NF-YB	10	Unigene0006328;Unigene0007951;Unigene0014993;Unigene0019482;Unigene0020516;Unigene0021887;Unigene0033925;Unigene0055779;Unigene0065010;Unigene0072195
MBD	9	Unigene0000322;Unigene0004671;Unigene0011061;Unigene0015300;Unigene0015658;Unigene0020251;Unigene0027255;Unigene0042665;Unigene0051268
HTH	9	Unigene0010933;Unigene0012338;Unigene0038713;Unigene0039512;Unigene0054333;Unigene0059486;Unigene0066607;Unigene0017099;Unigene0035441
ARID	9	Unigene0003496;Unigene0019301;Unigene0027685;Unigene0033103;Unigene0036287;Unigene0037489;Unigene0037934;Unigene0043197;Unigene0051476
NF-YC	9	Unigene0004672;Unigene0007312;Unigene0016078;Unigene0029657;Unigene0043219;Unigene0049246;Unigene0052023;Unigene0070585;Unigene0072101
C_EBP	9	Unigene0007809;Unigene0007923;Unigene0030693;Unigene0034099;Unigene0043943;Unigene0048934;Unigene0064749;Unigene0072114;Unigene0041312
zf-BED	8	Unigene0012341;Unigene0017164;Unigene0023372;Unigene0038266;Unigene0038623;Unigene0040145;Unigene0044776;Unigene0070513
RHD	7	Unigene0012405;Unigene0020072;Unigene0040193;Unigene0047743;Unigene0048176;Unigene0060103;Unigene0066561
MH1	7	Unigene0022389;Unigene0031679;Unigene0037299;Unigene0039240;Unigene0039241;Unigene0044266;Unigene0072332
DM	6	Unigene0011691;Unigene0021954;Unigene0021956;Unigene0040184;Unigene0040185;Unigene0067281
SF-like	6	Unigene0001635;Unigene0011254;Unigene0023125;Unigene0045688;Unigene0070409;Unigene0070410
P53	6	Unigene0007325;Unigene0014437;Unigene0033685;Unigene0034052;Unigene0047284;Unigene0052692
GCNF-like	6	Unigene0029231;Unigene0032444;Unigene0032445;Unigene0043880;Unigene0045218;Unigene0063053
Pou	5	Unigene0010365;Unigene0028280;Unigene0038095;Unigene0051964;Unigene0054860
T-box	5	Unigene0018082;Unigene0018102;Unigene0038970;Unigene0046737;Unigene0068338
PAX	5	Unigene0005179;Unigene0020873;Unigene0032271;Unigene0054185;Unigene0070853
zf-LITAF-like	4	Unigene0009650;Unigene0014533;Unigene0014534;Unigene0032322
HMGI_HMGY	4	Unigene0008504;Unigene0008505;Unigene0057473;Unigene0028092
Nrf1	4	Unigene0004494;Unigene0012216;Unigene0012543;Unigene0046566
zf-NF-X1	4	Unigene0016865;Unigene0020733;Unigene0045935;Unigene0055501
NGFIB-like	4	Unigene0012611;Unigene0036964;Unigene0025808;Unigene0046716
CBF	3	Unigene0032118;Unigene0033326;Unigene0038560
CP2	3	Unigene0019102;Unigene0032503;Unigene0059085
SRF	3	Unigene0012782;Unigene0017245;Unigene0038055
zf-C2HC	3	Unigene0010288;Unigene0020307;Unigene0046539
TEA	3	Unigene0018622;Unigene0018623;Unigene0018966
AF-4	3	Unigene0015467;Unigene0035109;Unigene0035110
ESR-like	3	Unigene0019887;Unigene0059547;Unigene0064378
HSF	3	Unigene0059554;Unigene0069962;Unigene0069963
zf-GAGA	3	Unigene0033649;Unigene0033650;Unigene0033652
NF-YA	2	Unigene0004479;Unigene0038503
COE	2	Unigene0044792;Unigene0051429
STAT	2	Unigene0040452;Unigene0069816
CUT	2	Unigene0046969;Unigene0047316
E2F	2	Unigene0022070;Unigene0027311
Tub	2	Unigene0019715;Unigene0034684
Miscellaneous	2	Unigene0038424;Unigene0060655
AP-2	2	Unigene0030034;Unigene0040592
PC4	2	Unigene0029815;Unigene0069643
CSL	2	Unigene0002762;Unigene0042883
SAND	1	Unigene0016362
CTF_NFI	1	Unigene0006381
NDT80_PhoG	1	Unigene0034504
Runt	1	Unigene0039500
CG-1	1	Unigene0046966
IRF	1	Unigene0007675
NCU-G1	1	Unigene0046061
HPD	1	Unigene0038965
