# Supplementary material for: Transcriptome Analysis Reveals the Molecular Response to Salinity Challenge in Larvae of the Giant Freshwater Prawn Macrobrachium rosenbergii
Source: Front Physiol. 2022 Apr 29;13:885035. doi: 10.3389/fphys.2022.885035 (PMC9099292; doi:10.3389/fphys.2022.885035)
Supplement: Supplementary file 13 [file Table10.XLSX]

## Sheet: S13 VS S16
Table S10 The significantly differentially enriched (P<0.05) KEGG pathways between S13 and S16.
KEGG Pathway	Gene Number	Pvalue	Genes
Ribosome	234	9.47878e-21	Unigene0000498;Unigene0000530;Unigene0001776;Unigene0001972;Unigene0002020;Unigene0002567;Unigene0002649;Unigene0002769;Unigene0002910;Unigene0002976;Unigene0003387;Unigene0003396;Unigene0003750;Unigene0003973;Unigene0004161;Unigene0005418;Unigene0005871;Unigene0006540;Unigene0006849;Unigene0007068;Unigene0008877;Unigene0009366;Unigene0009492;Unigene0009577;Unigene0009728;Unigene0009926;Unigene00…
Glycolysis / Gluconeogenesis	24	0.0213918	Unigene0000097;Unigene0001461;Unigene0002145;Unigene0002286;Unigene0002703;Unigene0004904;Unigene0005950;Unigene0009722;Unigene0009790;Unigene0018108;Unigene0020020;Unigene0024620;Unigene0026449;Unigene0026468;Unigene0026469;Unigene0044524;Unigene0045626;Unigene0047985;Unigene0048218;Unigene0051621;Unigene0057135;Unigene0060857;Unigene0064560;Unigene0065233
Glycosaminoglycan degradation	9	0.0472434	Unigene0011501;Unigene0024382;Unigene0027429;Unigene0038211;Unigene0039131;Unigene0042733;Unigene0047395;Unigene0048547;Unigene0063604
