# Supplementary material for: Transcriptome Analysis Reveals the Molecular Response to Salinity Challenge in Larvae of the Giant Freshwater Prawn Macrobrachium rosenbergii
Source: Front Physiol. 2022 Apr 29;13:885035. doi: 10.3389/fphys.2022.885035 (PMC9099292; doi:10.3389/fphys.2022.885035)
Supplement: Supplementary file 14 [file Table8.XLSX]

## Sheet: S10 VS S13
Table S8 The significantly differentially enriched (P<0.05) KEGG pathways between S10 and S13.
KEGG Pathway	Gene Number	Pvalue	Genes
Spliceosome	123	6.12e-09	Unigene0000119;Unigene0000783;Unigene0001092;Unigene0001262;Unigene0001297;Unigene0002399;Unigene0002557;Unigene0002698;Unigene0002987;Unigene0003332;Unigene0003436;Unigene0003545;Unigene0004096;Unigene0004773;Unigene0004825;Unigene0005091;Unigene0005304;Unigene0006146;Unigene0006535;Unigene0006537;Unigene0006981;Unigene0007235;Unigene0007278;Unigene0008373;Unigene0008805;Unigene0009136;Unigene00…
Ribosome biogenesis in eukaryotes	63	4.62e-05	Unigene0000859;Unigene0002039;Unigene0003164;Unigene0003441;Unigene0003933;Unigene0003979;Unigene0004201;Unigene0004815;Unigene0005123;Unigene0005413;Unigene0008675;Unigene0009130;Unigene0009982;Unigene0011209;Unigene0011381;Unigene0011528;Unigene0011549;Unigene0011828;Unigene0013049;Unigene0014383;Unigene0016213;Unigene0021604;Unigene0021745;Unigene0021767;Unigene0021768;Unigene0022683;Unigene00…
DNA replication	32	0.000206449	Unigene0001205;Unigene0005278;Unigene0006110;Unigene0006328;Unigene0006916;Unigene0009551;Unigene0010277;Unigene0012996;Unigene0014149;Unigene0024475;Unigene0025439;Unigene0028281;Unigene0030443;Unigene0034220;Unigene0037017;Unigene0041540;Unigene0043040;Unigene0043123;Unigene0043125;Unigene0044260;Unigene0045272;Unigene0047078;Unigene0048433;Unigene0048802;Unigene0049902;Unigene0049903;Unigene00…
Oxidative phosphorylation	105	0.00038444	Unigene0000903;Unigene0001718;Unigene0001730;Unigene0004023;Unigene0004431;Unigene0005286;Unigene0005298;Unigene0005326;Unigene0005327;Unigene0005449;Unigene0006479;Unigene0006918;Unigene0007644;Unigene0007777;Unigene0008356;Unigene0008452;Unigene0008652;Unigene0008968;Unigene0009497;Unigene0009621;Unigene0009634;Unigene0009776;Unigene0010988;Unigene0011135;Unigene0011711;Unigene0011745;Unigene00…
Pyrimidine metabolism	62	0.00254803	Unigene0001230;Unigene0001962;Unigene0002321;Unigene0005818;Unigene0005878;Unigene0006110;Unigene0006328;Unigene0009551;Unigene0012204;Unigene0013420;Unigene0014620;Unigene0018890;Unigene0019144;Unigene0020832;Unigene0021237;Unigene0021619;Unigene0022182;Unigene0022365;Unigene0022366;Unigene0025591;Unigene0026210;Unigene0026372;Unigene0027368;Unigene0032050;Unigene0034033;Unigene0034558;Unigene00…
RNA transport	107	0.00274003	Unigene0000116;Unigene0000169;Unigene0000216;Unigene0000545;Unigene0000678;Unigene0000891;Unigene0002427;Unigene0002726;Unigene0003570;Unigene0004722;Unigene0004773;Unigene0004984;Unigene0006409;Unigene0006766;Unigene0007177;Unigene0007278;Unigene0008156;Unigene0009358;Unigene0009419;Unigene0009895;Unigene0010708;Unigene0011935;Unigene0013773;Unigene0013999;Unigene0014067;Unigene0015808;Unigene00…
RNA polymerase	23	0.00308881	Unigene0001962;Unigene0014620;Unigene0018890;Unigene0019144;Unigene0020832;Unigene0021237;Unigene0021619;Unigene0025591;Unigene0034558;Unigene0036235;Unigene0037999;Unigene0040704;Unigene0040902;Unigene0045417;Unigene0050446;Unigene0050824;Unigene0051923;Unigene0057270;Unigene0061210;Unigene0063075;Unigene0064816;Unigene0064948;Unigene0070126
Aminoacyl-tRNA biosynthesis	34	0.00460625	Unigene0000622;Unigene0001912;Unigene0002476;Unigene0002799;Unigene0004353;Unigene0006619;Unigene0008568;Unigene0010483;Unigene0012290;Unigene0013513;Unigene0013600;Unigene0023355;Unigene0026838;Unigene0027975;Unigene0028444;Unigene0029042;Unigene0032631;Unigene0034359;Unigene0041422;Unigene0043512;Unigene0044514;Unigene0044965;Unigene0045664;Unigene0046445;Unigene0048395;Unigene0048665;Unigene00…
Ubiquitin mediated proteolysis	72	0.00573605	Unigene0000575;Unigene0001064;Unigene0001626;Unigene0001793;Unigene0002150;Unigene0002171;Unigene0002276;Unigene0002384;Unigene0002843;Unigene0003893;Unigene0003956;Unigene0003972;Unigene0005564;Unigene0005851;Unigene0006268;Unigene0007323;Unigene0007916;Unigene0008651;Unigene0010154;Unigene0010178;Unigene0010492;Unigene0010503;Unigene0010633;Unigene0011142;Unigene0011497;Unigene0012241;Unigene00…
Nucleotide excision repair	29	0.0107901	Unigene0003972;Unigene0005278;Unigene0005851;Unigene0006110;Unigene0006328;Unigene0010277;Unigene0012996;Unigene0014149;Unigene0015097;Unigene0019441;Unigene0022952;Unigene0022953;Unigene0022954;Unigene0024475;Unigene0025439;Unigene0030728;Unigene0034220;Unigene0035772;Unigene0037017;Unigene0039334;Unigene0039548;Unigene0040343;Unigene0043123;Unigene0043125;Unigene0048802;Unigene0054156;Unigene00…
Glutathione metabolism	41	0.015433	Unigene0000325;Unigene0002065;Unigene0002097;Unigene0002424;Unigene0002970;Unigene0005628;Unigene0006012;Unigene0006429;Unigene0006780;Unigene0009242;Unigene0010640;Unigene0011876;Unigene0017575;Unigene0019346;Unigene0019807;Unigene0021890;Unigene0033339;Unigene0035608;Unigene0036051;Unigene0037419;Unigene0038261;Unigene0041098;Unigene0041117;Unigene0042762;Unigene0042763;Unigene0043016;Unigene00…
Metabolic pathways	587	0.0158426	Unigene0000016;Unigene0000097;Unigene0000108;Unigene0000200;Unigene0000203;Unigene0000235;Unigene0000325;Unigene0000584;Unigene0000814;Unigene0000903;Unigene0001026;Unigene0001182;Unigene0001230;Unigene0001619;Unigene0001679;Unigene0001718;Unigene0001730;Unigene0001962;Unigene0002065;Unigene0002097;Unigene0002114;Unigene0002121;Unigene0002265;Unigene0002295;Unigene0002329;Unigene0002331;Unigene00…
Wnt signaling pathway	49	0.0167433	Unigene0000513;Unigene0001775;Unigene0002150;Unigene0003427;Unigene0005851;Unigene0006524;Unigene0010154;Unigene0010617;Unigene0015844;Unigene0015893;Unigene0017257;Unigene0017258;Unigene0020152;Unigene0020689;Unigene0021181;Unigene0021416;Unigene0021417;Unigene0021476;Unigene0023035;Unigene0023189;Unigene0023689;Unigene0030015;Unigene0030016;Unigene0030883;Unigene0031625;Unigene0031679;Unigene00…
Histidine metabolism	13	0.0238727	Unigene0002562;Unigene0002890;Unigene0004247;Unigene0008010;Unigene0010299;Unigene0010488;Unigene0018506;Unigene0038197;Unigene0041676;Unigene0041727;Unigene0044286;Unigene0045307;Unigene0047458
Alanine, aspartate and glutamate metabolism	24	0.0290422	Unigene0000016;Unigene0005031;Unigene0010942;Unigene0022182;Unigene0022365;Unigene0022366;Unigene0032412;Unigene0032992;Unigene0034021;Unigene0035612;Unigene0035613;Unigene0035631;Unigene0035739;Unigene0035740;Unigene0037373;Unigene0037374;Unigene0037375;Unigene0039786;Unigene0041698;Unigene0047909;Unigene0048548;Unigene0048780;Unigene0062560;Unigene0070157
Protein processing in endoplasmic reticulum	104	0.0291925	Unigene0000431;Unigene0000580;Unigene0002449;Unigene0002698;Unigene0002833;Unigene0003039;Unigene0003570;Unigene0004973;Unigene0005441;Unigene0005851;Unigene0007340;Unigene0007360;Unigene0008373;Unigene0008542;Unigene0008651;Unigene0008682;Unigene0009619;Unigene0010594;Unigene0010826;Unigene0011160;Unigene0011497;Unigene0011793;Unigene0012073;Unigene0012915;Unigene0013274;Unigene0014187;Unigene00…
Protein export	19	0.0335546	Unigene0001650;Unigene0003261;Unigene0003341;Unigene0004973;Unigene0006862;Unigene0007192;Unigene0013274;Unigene0014187;Unigene0017662;Unigene0019740;Unigene0023555;Unigene0024200;Unigene0034352;Unigene0034611;Unigene0035954;Unigene0036524;Unigene0041862;Unigene0061073;Unigene0071229
Starch and sucrose metabolism	23	0.0343746	Unigene0002114;Unigene0002265;Unigene0003000;Unigene0004088;Unigene0005615;Unigene0005945;Unigene0007070;Unigene0011659;Unigene0012588;Unigene0020108;Unigene0022163;Unigene0035582;Unigene0036354;Unigene0037452;Unigene0039192;Unigene0045094;Unigene0047461;Unigene0047730;Unigene0048216;Unigene0049032;Unigene0059143;Unigene0061412;Unigene0067938
Galactose metabolism	20	0.0436208	Unigene0002616;Unigene0005615;Unigene0005945;Unigene0008329;Unigene0009234;Unigene0020108;Unigene0036354;Unigene0039680;Unigene0042697;Unigene0042698;Unigene0044460;Unigene0046746;Unigene0048216;Unigene0048218;Unigene0049032;Unigene0053405;Unigene0058134;Unigene0061412;Unigene0064317;Unigene0067938
Notch signaling pathway	22	0.0463364	Unigene0002762;Unigene0010617;Unigene0020439;Unigene0021181;Unigene0030015;Unigene0030016;Unigene0030883;Unigene0031432;Unigene0031581;Unigene0032669;Unigene0032670;Unigene0032672;Unigene0035151;Unigene0038382;Unigene0038475;Unigene0042676;Unigene0043613;Unigene0046297;Unigene0047006;Unigene0047129;Unigene0060868;Unigene0061777
Longevity regulating pathway - worm	44	0.0470553	Unigene0000325;Unigene0001323;Unigene0002638;Unigene0004819;Unigene0006767;Unigene0008339;Unigene0009216;Unigene0009993;Unigene0010169;Unigene0011694;Unigene0012133;Unigene0012779;Unigene0018632;Unigene0018954;Unigene0023083;Unigene0023428;Unigene0024224;Unigene0028947;Unigene0032353;Unigene0033741;Unigene0033742;Unigene0035608;Unigene0037419;Unigene0038261;Unigene0038871;Unigene0038968;Unigene00…
